# Supplementary material for: Targets for Renal Carcinoma Growth Control Identified by Screening FOXD1 Cell Proliferation Pathways
Source: MDPI journal article supplement (doi:10.3390/cancers14163958), 2022-08-16
Supplement: s1 [file s1]

**Table S2:** Compound titrations used in study.

| Compound                  | Target    | Reported Concentration (& Source of report) | Reported Assay                                                                                            |
|---------------------------|-----------|---------------------------------------------|-----------------------------------------------------------------------------------------------------------|
| AMZ30                     | PME1      | IC50 = 0.6µM (Calbiochem)                   | Human cell protein lysates and HEK293T methylated PP2A measurements.                                      |
| EED226                    | SUZ12     | IC50 = 53.5nM (Selleckchem)                 | Human G401 Cells <i>in vitro</i> enzymatic assay.                                                         |
| CINPA1                    | CXADR     | IC50 = 70nM (EMD Millipore)                 | Human primary hepatocytes CAR-mediated transcription analysis.                                            |
| Galectin-9 mAb            | LGALS9    | 1 IU = 1 µg/ml (Sigma-Aldrich)              | Human CD14+ PBMCs expression of CD40, CD54, and CD80.                                                     |
| Recombinant Semaphorin 3C | SEMA3 C   | Reported = 10 µg/ml (R&D Systems)           | Mouse SVEC-4-10 Cells binding to fibronectin.                                                             |
| Recombinant CXCL5         | CXCL5     | ED50 = 3 – 15ng/ml (R&D Systems)            | Chemoattraction of CXCR2+ mouse BaF3 cells .                                                              |
| Recombinant ANGPTL4       | ANGPT L4  | IC50 = 0.05-2µg/ml (R&D Systems)            | Chemical assay inhibition of lipoprotein lipase activity.                                                 |
| Recombinant SHH           | HHIP      | ED50 = 0.1 – 0.42 µg/ml (R&D Systems)       | Mouse C3H10T1/2 alkaline phosphatase assay.                                                               |
| Recombinant CTRP1         | C1QTN F1  | ED50 = 0.6- 3.62 µg/ml (R&D Systems)        | Functional ELISA protein binding to recombinant BAI3                                                      |
| Recombinant Netrin        | UNC5B     | ED50 = 0.5 – 2.0 µg/ml (R&D Systems)        | Rat RT4-D6P2T proliferation assay.                                                                        |
| WAY1701523                | MMP1 3    | IC50 = 17nM (Tocris,[25])                   | Alkaline phosphatase activity of AP- PAR1 rat cardiac fibroblasts.                                        |
| C5OH                      | S100P     | IC50 = 100nM ([43])                         | NF-κB activity of human BxPC-3 cells expressing NF-κB-luc.                                                |
| CPI-637                   | EP300     | IC50 = 0.05µM (Selleckchem)                 | TR-FRET Assay inhibition of CBP/EP300 in human AMO-1 cells.                                               |
| FDI-6                     | FOXM1     | IC50 = 22.5µM (Sigma-Aldrich)               | Proliferation inhibition of human MCF-7 cells.                                                            |
| APE-1 Inhibitor III       | APEX1     | IC50 = 600nM - 12µM (EMD Millipore)         | Alkaline phosphatase activity inhibition of APE1 in human HEK293T and HeLa cells.                         |
| Benzyl Isocyanate         | AGPS      | IC50 = 2 - 5µM ([33])                       | Inhibition of proliferation of human MDA-MB-231 cells.                                                    |
| Silibinin                 | TMEM 167A | IC50 = 30.9µM                               | Proliferation of human fibroblasts, E.coli ATP synthase activity, and gene expression of prostate cancer. |
| Recombinant LTBP1         | LTBP1     | IC50 = 2µg/ml ([48])                        | Immunolocalization with extracted fibrillin-1.                                                            |
