# Supplementary material for: Targets for Renal Carcinoma Growth Control Identified by Screening FOXD1 Cell Proliferation Pathways
Source: MDPI journal article supplement (doi:10.3390/cancers14163958), 2022-08-16
Supplement: s1 [file s1]

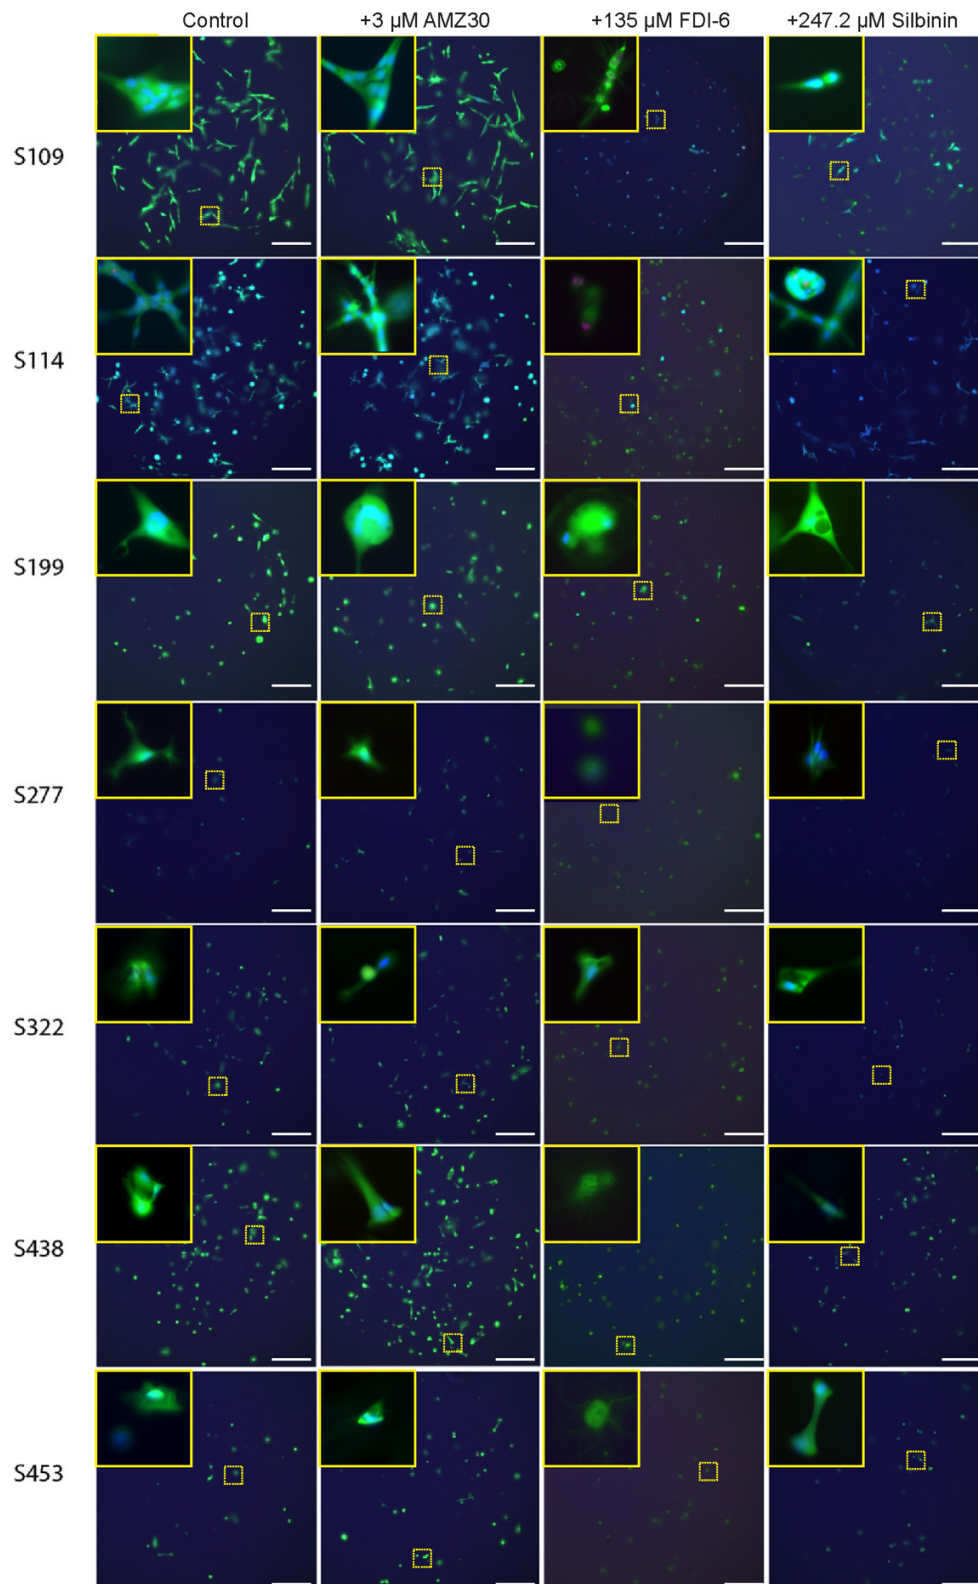

**Figure S1:** Compound treatment of patient tumor avatars. Scalebar = 500 microns.

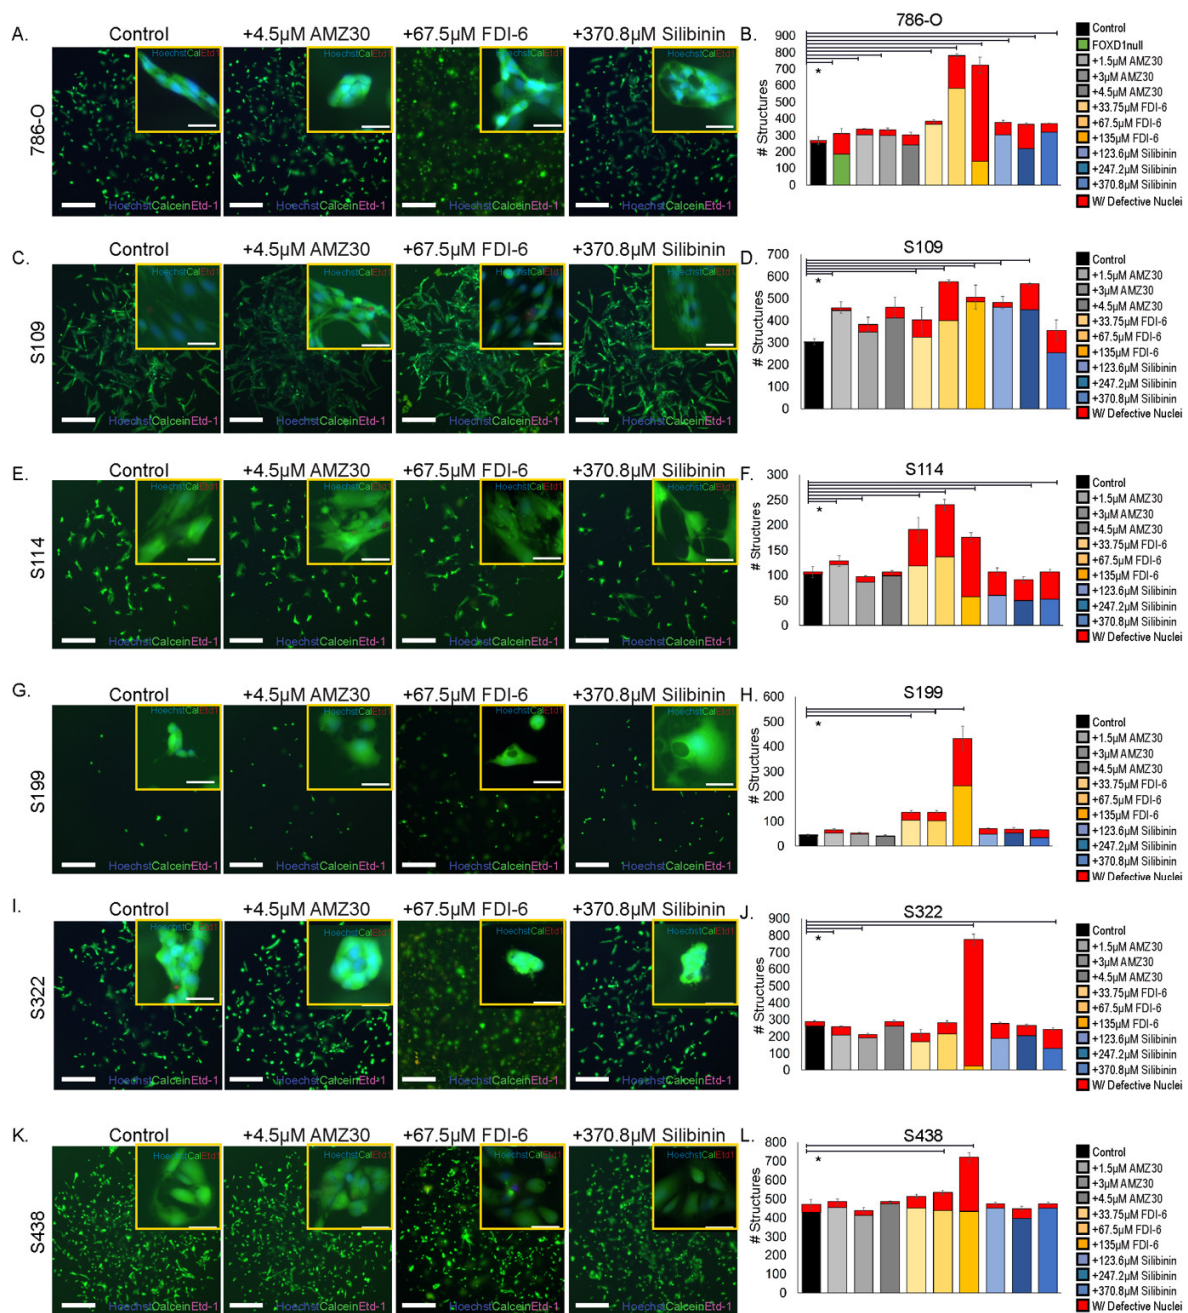

**Figure S2:** Compound treatment of primary 3D cultures structure analysis. (A-L) Treatments of primary 3D tumor cultures with compounds (AMZ30, Silibinin, FDI-6) were titrated and analyzed for number of structures formed. Scalebar = 500µm. Inlay images are representative structures. Scalebar = 20µm.

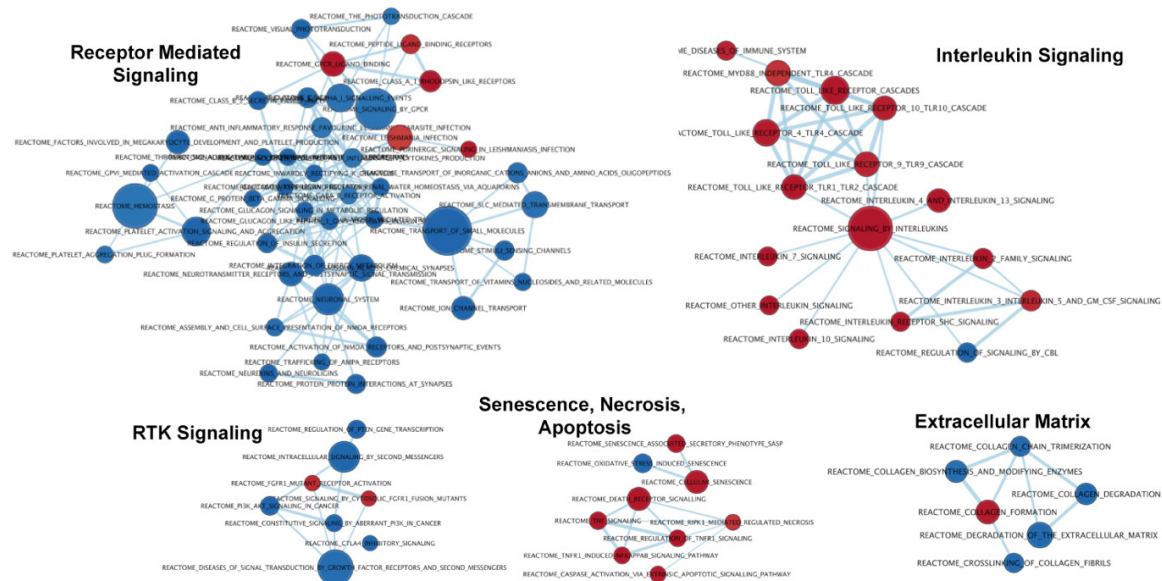

**Figure S3:** GSEA Pathway analysis identifies actionable pathways. Red nodes indicate REACTOME pathways upregulated in 786-O<sup>FOXDI</sup> while blue nodes indicate pathways downregulated in 786-O<sup>FOXDI</sup>.

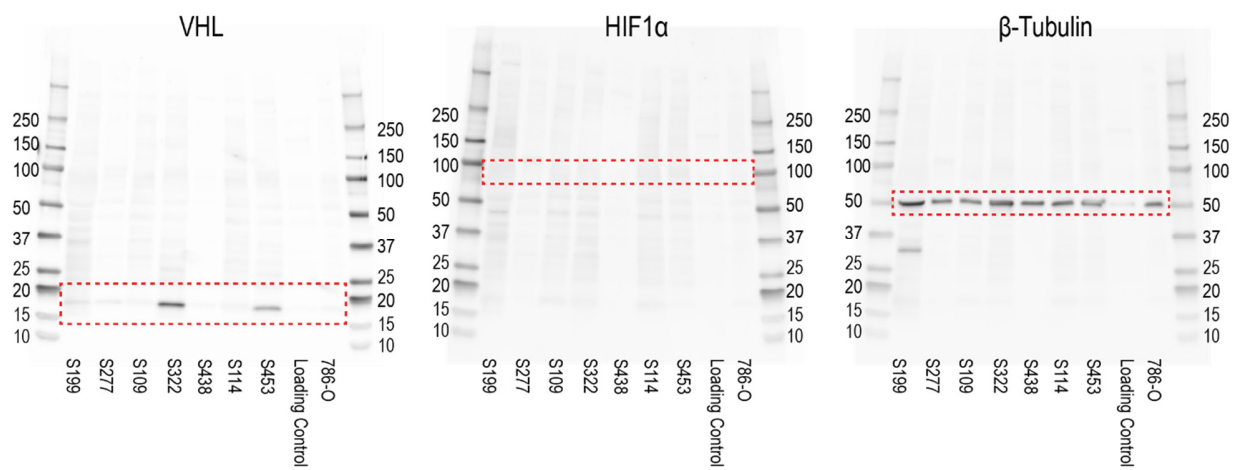

**Figure S4:** Uncropped Western Blot Figures. Unedited blots used in Figure 8A. Dotted-red line indicates region analyzed for protein abundance against designated target. Contrast enhanced in main figure for presentation.
