# Supplementary material for: Targets for Renal Carcinoma Growth Control Identified by Screening FOXD1 Cell Proliferation Pathways
Source: Cancers (Basel). 2022 Aug 16;14(16):3958. doi: 10.3390/cancers14163958 (PMC9406217; doi:10.3390/cancers14163958)
Supplement: Supplementary file 1 [file cancers-14-03958-s001.zip › Table S1.xlsx]

## Sheet: Details
						This document contains the analysis of RNA-seq comparing 786-O and 786-OFOXD1null cells.
						Each tab details a separate step in the curation of the data from differential gene analysis to candidate compound selection,
						as indicated in the tab name.
						Original sequencing data is available in the NCBI GEO repository under accession number GSE210145

## Sheet: 16855 total 5828 diff
This tab contains all identified genes fron RNA-seq
ID	log2FoldChange	Fold Change	pvalue	padj	LD2-3	LD2-2	LD2-1	Parent-3	Parent-2	Parent-1	Gene.name
ENSG00000129991	-6.63843	0.0100377	NA	NA	0	0	1.07789	2.75969	105.164	1.11601	TNNI3
ENSG00000171560	-4.63561	0.0402294	NA	NA	0	0	3.23367	2.75969	77.0597	0	FGA
ENSG00000130224	-4.00252	0.062391	NA	NA	0.971127	1.0105	107.789	587.814	581.121	589.253	LRCH2
ENSG00000127324	-3.99184	0.0628547	NA	NA	0	0	7.54524	3.67959	116.043	0	TSPAN8
ENSG00000101938	-3.87286	0.0682579	NA	NA	8.74014	13.1365	253.304	1384.45	1331.77	1313.54	CHRDL1
ENSG00000166825	-3.8557	0.0690748	NA	NA	9.71127	5.05251	330.913	1670.53	1550.26	1782.27	ANPEP
ENSG00000118194	-3.73417	0.0751456	NA	NA	0	1.0105	8.62313	0.919897	126.922	0	TNNT2
ENSG00000140937	-3.6868	0.077654	NA	NA	0.971127	1.0105	155.216	701.882	646.395	675.186	CDH11
ENSG00000120594	-3.68141	0.0779445	NA	NA	20.3937	13.1365	389.119	1865.55	1720.7	1834.72	PLXDC2
ENSG00000064042	-3.65304	0.0794923	NA	NA	3.88451	7.07352	141.204	587.814	660.9	664.026	LIMCH1
ENSG00000002933	-3.6378	0.0803363	NA	NA	0	1.0105	7.54524	2.75969	103.351	0	TMEM176A
ENSG00000163581	-3.59402	0.0828119	NA	NA	7.76901	6.06301	169.229	743.277	741.586	724.29	SLC2A2
ENSG00000017483	-3.54986	0.0853856	NA	NA	25.2493	22.2311	272.707	1199.55	1252.9	1295.69	SLC38A5
ENSG00000092054	-3.53052	0.0865382	NA	NA	0	1.0105	108.867	21.1576	1248.37	0	MYH7
ENSG00000197616	-3.51373	0.0875513	NA	NA	1.94225	0	237.136	27.5969	2703.44	0	MYH6
ENSG00000169604	-3.4079	0.094215	NA	NA	45.6429	54.5671	482.895	2109.32	1975.45	2102.56	ANTXR1
ENSG00000077522	-3.19056	0.109534	NA	NA	0	0	12.9347	3.67959	114.23	0	ACTN2
ENSG00000159251	-3.1336	0.113944	NA	NA	0.971127	1.0105	56.0504	6.43928	501.341	1.11601	ACTC1
ENSG00000176153	-2.98735	0.126101	NA	NA	0.971127	3.03151	12.9347	5.51938	121.482	6.69606	GPX2
ENSG00000187134	-2.45044	0.182955	NA	NA	14.5669	24.2521	60.3619	45.075	459.639	36.8283	AKR1C1
ENSG00000130822	-0.000205495	0.999858	0.999716	0.999716	13.5958	19.1995	8.62313	8.27908	20.8515	12.2761	PNCK
ENSG00000107281	-2.96e-05	0.999979	0.999706	0.999716	4966.34	5060.6	5530.66	5200.18	4959.02	5399.25	NPDC1
ENSG00000099999	-5.17e-05	0.999964	0.999639	0.999716	550.629	613.375	515.232	535.38	553.017	592.601	RNF215
ENSG00000164746	-0.00021097	0.999854	0.999472	0.999649	43.7007	66.6932	36.6483	44.1551	57.1148	45.7564	C7orf57
ENSG00000254815	-0.000167845	0.999884	0.999451	0.999649	79.6324	88.9242	68.985	72.6719	67.9939	98.2088	AP006284.1
ENSG00000165685	0.000433627	1.0003	0.999217	0.999513	16.5092	27.2836	22.6357	18.3979	30.8239	16.7401	TMEM52B
ENSG00000123983	0.000102624	1.00007	0.998864	0.999219	8842.11	8835.83	8097.12	8563.32	8812.01	8397.97	ACSL3
ENSG00000210100	0.000294349	1.0002	0.998807	0.999219	197.139	157.638	246.837	178.46	219.394	203.114	MT-TI
ENSG00000149292	0.000208585	1.00014	0.998769	0.999219	264.146	265.762	273.784	286.088	241.152	276.77	TTC12
ENSG00000123545	-0.000317451	0.99978	0.998726	0.999219	282.598	300.119	465.649	372.558	350.848	323.643	NDUFAF4
ENSG00000281087	0.000983631	1.00068	0.998177	0.998768	20.3937	21.2205	31.2589	29.4367	28.1041	14.5081	AC135068.6
ENSG00000125450	-0.000222956	0.999845	0.998166	0.998768	2865.79	2959.76	3438.47	2973.11	3087.83	3204.06	NUP85
ENSG00000226193	0.000910304	1.00063	0.99813	0.998768	21.3648	37.3886	22.6357	30.3566	26.291	24.5522	AL049548.1
ENSG00000230358	-0.00115151	0.999202	0.998076	0.998768	20.3937	10.105	28.0252	19.3178	19.0383	20.0882	SPDYE21P
ENSG00000109689	0.00021564	1.00015	0.998042	0.998768	909.946	870.042	939.921	881.262	928.343	909.548	STIM2
ENSG00000181192	-0.000274061	0.99981	0.997849	0.998735	1381.91	1332.85	1183.52	1270.38	1235.68	1396.13	DHTKD1
ENSG00000140992	-0.000346813	0.99976	0.997809	0.998735	1554.77	1542.03	1202.93	1483.79	1313.64	1505.5	PDPK1
ENSG00000240854	0.00151435	1.00105	0.9978	0.998735	13.5958	13.1365	9.70102	8.27908	11.7856	16.7401	AC117409.1
ENSG00000234072	0.000360789	1.00025	0.997788	0.998735	297.165	285.972	285.641	264.011	295.547	310.251	AC074117.1
ENSG00000160062	-0.000494209	0.999657	0.997247	0.99837	415.642	355.697	362.172	406.595	404.337	321.411	ZBTB8A
ENSG00000197061	0.00118542	1.00082	0.996863	0.998044	91.2859	75.7877	162.762	123.266	116.949	88.1647	HIST1H4C
ENSG00000185721	0.000501246	1.00035	0.996756	0.997996	1833.49	1823.96	2397.23	2018.25	2041.63	1990.96	DRG1
ENSG00000062194	0.000294111	1.0002	0.996714	0.997996	1962.65	1922.99	1938.05	1975.94	1959.13	1886.06	GPBP1
ENSG00000139546	-0.00052166	0.999638	0.996692	0.997996	894.408	901.368	1137.18	988.89	909.305	1035.66	TARBP2
ENSG00000050405	0.000452141	1.00031	0.996617	0.997996	1748.03	1748.17	2113.75	1901.43	1937.37	1766.64	LIMA1
ENSG00000228606	0.0018454	1.00128	0.996559	0.997996	19.4225	22.2311	16.1684	18.3979	16.3185	23.4362	AL139011.1
ENSG00000277072	-0.000425246	0.999705	0.99643	0.997966	682.702	623.48	657.514	658.646	651.835	653.982	STAG3L2
ENSG00000055070	-0.000312325	0.999784	0.996302	0.997896	7535.94	7726.3	8198.44	7874.32	7781.22	7808.72	SZRD1
ENSG00000270006	0.00166678	1.00116	0.996297	0.997896	23.307	36.3781	40.9599	34.9561	38.0766	26.7842	AC010531.6
ENSG00000225684	-0.00178206	0.998766	0.996286	0.997896	36.9028	33.3466	21.5578	22.9974	38.9832	30.1323	FAM225B
ENSG00000106605	0.000590978	1.00041	0.996181	0.997896	1538.26	1648.13	2065.24	1720.21	1727.04	1801.24	BLVRA
ENSG00000181450	0.000975467	1.00068	0.995871	0.997701	364.172	337.508	222.046	311.845	306.426	305.787	ZNF678
ENSG00000173209	-0.000744578	0.999484	0.995721	0.997609	2059.76	1768.38	1451.92	1688.01	1669.02	1928.46	AHSA2P
ENSG00000166450	0.0009889	1.00069	0.995694	0.997609	263.175	227.363	182.164	223.535	252.031	196.418	PRTG
ENSG00000228532	-0.0023117	0.998399	0.99569	0.997609	14.5669	24.2521	33.4146	26.677	20.8515	24.5522	AC005000.1
ENSG00000260461	0.00222822	1.00155	0.995573	0.997609	24.2782	43.4516	32.3367	20.2377	40.7963	39.0603	AL133355.1
ENSG00000100401	-0.000750314	0.99948	0.995525	0.997609	7731.14	8124.44	10927.7	9031.55	8950.71	8813.13	RANGAP1
ENSG00000251474	0.000959333	1.00067	0.995304	0.997488	359.317	293.046	258.694	317.365	271.069	323.643	RPL32P3
ENSG00000184304	-0.00103756	0.999281	0.995289	0.997488	381.653	393.085	256.538	353.241	349.035	330.339	PRKD1
ENSG00000264112	-0.00125871	0.999128	0.995148	0.99745	426.325	326.392	232.825	314.605	349.035	323.643	AC015813.1
ENSG00000268357	0.0020684	1.00143	0.995076	0.997437	40.7873	29.3046	31.2589	35.876	37.17	27.9002	VN1R81P
ENSG00000243415	0.0035155	1.00244	0.994923	0.997342	23.307	17.1785	6.46735	14.7184	13.5988	18.9722	AC107021.1
ENSG00000004961	0.000775019	1.00054	0.994775	0.997253	1106.11	1201.49	1417.43	1319.13	1232.96	1168.46	HCCS
ENSG00000125611	0.000919494	1.00064	0.994502	0.997038	583.647	665.921	796.562	658.646	706.23	678.534	CHCHD5
ENSG00000183665	0.00106641	1.00074	0.994428	0.997023	280.656	247.573	323.367	304.486	289.201	255.566	TRMT12
ENSG00000189180	-0.00103186	0.999285	0.994254	0.996908	1892.73	1735.03	1283.77	1634.66	1599.22	1682.94	ZNF33A
ENSG00000135932	-0.000529127	0.999633	0.994244	0.996908	4987.71	4936.3	4563.79	4973.88	4752.32	4767.59	CAB39
ENSG00000255339	0.00390551	1.00271	0.994207	0.996908	20.3937	13.1365	11.8568	17.478	8.15926	20.0882	AL133352.1
ENSG00000250966	0.0036596	1.00254	0.994195	0.996908	11.6535	12.126	16.1684	12.8786	14.5054	12.2761	AC023886.2
ENSG00000127837	-0.000771611	0.999465	0.994177	0.996908	3438.76	3570.1	4302.94	3630.83	3851.17	3834.61	AAMP
ENSG00000138686	-0.000717685	0.999503	0.994107	0.996908	760.392	708.362	738.356	782.833	718.015	706.434	BBS7
ENSG00000116497	0.000857718	1.00059	0.993806	0.996814	1226.53	1219.68	993.816	1114	1175.84	1149.49	S100PBP
ENSG00000174206	-0.00120506	0.999165	0.993557	0.996624	285.511	264.752	237.136	292.527	258.377	236.594	C12orf66
ENSG00000272010	-0.004874	0.996627	0.993213	0.996337	13.5958	8.08402	35.5704	17.478	21.758	17.8562	AC100814.1
ENSG00000167080	-0.0048998	0.996609	0.993139	0.996322	11.6535	11.1155	10.7789	8.27908	9.06585	16.7401	B4GALNT2
ENSG00000231043	-0.00413845	0.997136	0.99296	0.996202	11.6535	22.2311	18.3242	15.6383	20.8515	15.6241	AC007238.1
ENSG00000116117	-0.00188127	0.998697	0.992908	0.996202	216.561	223.321	134.736	205.137	193.103	177.445	PARD3B
ENSG00000247400	0.00257905	1.00179	0.992894	0.996202	62.1521	64.6721	43.1157	44.1551	62.5544	63.6125	DNAJC3-AS1
ENSG00000224094	-0.00265477	0.998162	0.992238	0.995655	44.6718	66.6932	72.2187	57.9535	58.928	66.9606	RPS24P8
ENSG00000172586	0.00170852	1.00118	0.992237	0.995655	990.549	967.051	1537.07	1189.43	1191.25	1108.2	CHCHD1
ENSG00000234719	-0.00438222	0.996967	0.992141	0.995655	15.538	18.189	18.3242	16.5582	20.8515	14.5081	NPIPB2
ENSG00000171988	-0.00159709	0.998894	0.992063	0.995655	2721.1	2769.79	1790.38	2421.17	2325.39	2544.5	JMJD1C
ENSG00000100994	0.000708638	1.00049	0.991931	0.995583	6255.03	6666.28	6867.25	6542.31	6545.54	6690.48	PYGB
ENSG00000189362	-0.00113618	0.999213	0.991754	0.995464	610.839	581.039	513.076	579.535	562.989	564.701	NEMP2
ENSG00000223797	-0.00219816	0.998478	0.991717	0.995464	79.6324	77.8087	81.9197	75.4316	79.7795	84.8167	ENTPD3-AS1
ENSG00000140006	-0.00124477	0.999138	0.991667	0.995464	390.393	376.917	390.197	422.233	367.167	368.283	WDR89
ENSG00000229539	-0.00457197	0.996836	0.991596	0.995464	15.538	24.2521	32.3367	17.478	29.0107	25.6682	AL353194.1
ENSG00000004799	0.00257172	1.00178	0.991514	0.99546	181.601	137.428	109.945	118.667	175.877	133.921	PDK4
ENSG00000242100	0.00371549	1.00258	0.991435	0.99544	42.7296	31.3256	43.1157	26.677	48.9556	41.2923	RPL9P32
ENSG00000150628	-0.00586768	0.995941	0.991262	0.995325	11.6535	26.2731	9.70102	16.5582	13.5988	17.8562	SPATA4
ENSG00000113583	0.000754139	1.00052	0.991259	0.995325	7479.62	7363.53	7021.38	7205.56	7559.1	7087.78	C5orf15
ENSG00000167081	0.000814108	1.00056	0.991069	0.99525	2169.5	2117	2262.49	2177.4	2220.23	2146.09	PBX3
ENSG00000174010	0.0018364	1.00127	0.991006	0.995245	771.074	726.551	505.531	634.729	706.23	660.678	KLHL15
ENSG00000258427	0.00533547	1.00371	0.99015	0.994445	17.4803	18.189	32.3367	25.7571	23.5712	17.8562	RBM8B
ENSG00000210191	0.00153776	1.00107	0.990072	0.994425	941.993	726.551	915.13	836.187	850.377	895.04	MT-TL2
ENSG00000214432	0.00497841	1.00346	0.989988	0.994401	24.2782	33.3466	21.5578	34.0362	24.4778	20.0882	VPS33B-DT
ENSG00000260213	-0.00747318	0.994833	0.989978	0.994401	9.71127	16.168	10.7789	11.9587	6.34609	18.9722	AC092718.2
ENSG00000185963	-0.000970922	0.999327	0.989786	0.994316	3187.24	3409.43	3193.79	3379.7	3121.37	3296.69	BICD2
ENSG00000205578	-0.00316225	0.99781	0.989738	0.994316	71.8634	67.7037	58.2061	57.0336	66.1807	75.8886	POM121B
ENSG00000198868	-0.00420759	0.997088	0.989486	0.994132	43.7007	42.4411	28.0252	39.5556	36.2634	39.0603	MTND4LP30
ENSG00000171109	-0.000945798	0.999345	0.989396	0.994101	2118.03	2090.73	2059.85	2127.72	2115.97	2027.79	MFN1
ENSG00000253882	0.00857245	1.00596	0.989085	0.993848	12.6246	18.189	7.54524	18.3979	5.43951	14.5081	AC099548.2
ENSG00000142676	0.0016126	1.00112	0.989009	0.993831	21289	21680.3	27985.3	23394.8	23718.1	23761	RPL11
ENSG00000151651	-0.00493523	0.996585	0.988915	0.993795	31.0761	25.2626	28.0252	32.1964	23.5712	29.0162	ADAM8
ENSG00000147894	-0.00253857	0.998242	0.988765	0.993704	247.637	269.804	198.332	198.698	263.816	255.566	C9orf72
ENSG00000273472	0.00656594	1.00456	0.988759	0.993704	17.4803	19.1995	24.7915	27.5969	21.758	11.1601	AC096733.2
ENSG00000256525	0.00176829	1.00123	0.988607	0.993663	418.556	412.285	351.393	378.998	391.645	411.807	POLG2
ENSG00000279048	-0.00897673	0.993797	0.988497	0.993611	14.5669	4.04201	19.402	11.0388	12.6922	14.5081	AC080080.1
ENSG00000240053	0.00250868	1.00174	0.988244	0.993416	247.637	200.079	192.943	202.377	195.822	243.29	LY6G5B
ENSG00000181163	-0.00195564	0.998645	0.988084	0.993314	35203.3	34682.5	47407.8	40075.3	40451.8	36923.2	NPM1
ENSG00000272405	-0.00135731	0.99906	0.98808	0.993314	1040.08	1069.11	1076.81	1070.76	991.804	1128.29	AL365181.3
ENSG00000273270	0.00261202	1.00181	0.988072	0.993314	138.871	124.292	153.061	137.065	145.96	131.689	AC090114.2
ENSG00000180979	-0.00154306	0.998931	0.987796	0.993202	807.006	716.446	813.808	766.274	816.833	755.538	LRRC57
ENSG00000129226	-0.0057131	0.996048	0.987688	0.993152	25.2493	29.3046	24.7915	21.1576	31.7305	26.7842	CD68
ENSG00000167601	-0.00104476	0.999276	0.987648	0.993152	16038.2	16913.8	15474.2	16422.9	15906	16133	AXL
ENSG00000265678	-0.00485046	0.996644	0.987562	0.993144	45.6429	54.5671	39.882	35.876	45.3292	60.2645	AC129510.1
ENSG00000118200	0.00221356	1.00154	0.987433	0.993074	3139.65	3115.38	2198.9	2890.32	2804.07	2747.62	CAMSAP2
ENSG00000182810	0.00220978	1.00153	0.987297	0.992996	363.201	381.97	477.506	393.716	414.309	411.807	DDX28
ENSG00000126012	-0.00144099	0.999002	0.987144	0.992901	4866.32	5051.5	4316.96	4836.82	4527.49	4887.01	KDM5C
ENSG00000221914	0.00130296	1.0009	0.987124	0.992901	1433.38	1437.94	1526.29	1464.48	1514	1412.87	PPP2R2A
ENSG00000187066	0.00421897	1.00293	0.98706	0.992901	53.412	57.5986	73.2966	65.3127	52.5819	65.8446	TMEM262
ENSG00000172426	0.00977424	1.0068	0.987054	0.992901	13.5958	8.08402	9.70102	13.7985	6.34609	11.1601	RSPH9
ENSG00000254204	0.00707675	1.00492	0.987045	0.992901	26.2204	22.2311	12.9347	21.1576	19.0383	21.2042	AC022034.4
ENSG00000226015	-0.00604593	0.995818	0.987003	0.992901	28.1627	27.2836	30.181	22.9974	38.0766	24.5522	CCT8P1
ENSG00000135476	0.00157224	1.00109	0.986906	0.992901	2592.91	2738.46	2287.29	2464.4	2491.3	2657.22	ESPL1
ENSG00000152683	0.00151488	1.00105	0.986903	0.992901	1932.54	1938.14	1698.76	1846.23	1943.72	1773.34	SLC30A6
ENSG00000169696	-0.00178779	0.998762	0.986614	0.992841	1122.62	1084.27	1319.34	1157.23	1227.52	1143.91	ASPSCR1
ENSG00000130764	-0.00176168	0.99878	0.986543	0.992828	2508.42	2563.64	3092.47	2709.1	2649.04	2815.69	LRRC47
ENSG00000197102	0.00232348	1.00161	0.986507	0.992828	15096.2	15161.6	10662.5	13953.9	13293.3	13608.6	DYNC1H1
ENSG00000232284	-0.00988975	0.993168	0.986486	0.992828	23.307	14.147	6.46735	11.0388	19.9449	13.3921	GNG12-AS1
ENSG00000163374	-0.00141581	0.999019	0.986458	0.992828	1708.21	1662.28	1531.68	1675.13	1593.78	1639.42	YY1AP1
ENSG00000117153	-0.00160396	0.998889	0.986441	0.992828	1573.23	1588.51	1388.32	1601.54	1463.23	1490.99	KLHL12
ENSG00000143632	0.00903114	1.00628	0.98613	0.992708	21.3648	32.3361	30.181	17.478	50.7688	14.5081	ACTA1
ENSG00000169100	-0.00175725	0.998783	0.986093	0.992708	13072.3	13726.7	16358.1	14496.7	14184.4	14527.1	SLC25A6
ENSG00000115539	0.00281545	1.00195	0.986073	0.992708	816.717	825.58	1213.71	990.729	937.409	920.708	PDCL3
ENSG00000177548	0.00319844	1.00222	0.98606	0.992708	703.096	772.024	1157.66	880.342	804.141	941.912	RABEP2
ENSG00000237437	0.00831833	1.00578	0.985784	0.992597	29.1338	33.3466	10.7789	26.677	20.8515	25.6682	ASS1P12
ENSG00000241563	0.0104706	1.00728	0.985733	0.992597	10.6824	16.168	6.46735	9.19897	11.7856	12.2761	CORT
ENSG00000130147	-0.00148089	0.998974	0.985653	0.992583	5429.57	5748.75	5097.35	5636.21	5145.78	5511.97	SH3BP4
ENSG00000094916	0.00251034	1.00174	0.985486	0.992473	12662.5	11824.9	8660.86	11256.8	10726.7	11108.8	CBX5
ENSG00000263843	0.00377755	1.00262	0.985339	0.992385	119.449	108.124	87.3092	99.3489	112.417	102.673	AC022211.2
ENSG00000100852	-0.00262074	0.998185	0.985338	0.992385	3589.28	3333.65	2434.96	3147.89	3234.69	2993.14	ARHGAP5
ENSG00000163558	0.00197678	1.00137	0.985337	0.992385	3112.46	3105.27	2494.24	2950.11	2932.8	2817.92	PRKCI
ENSG00000171680	0.00263062	1.00183	0.985283	0.992385	1090.58	1027.68	772.848	959.453	902.959	1025.61	PLEKHG5
ENSG00000117481	0.00152623	1.00106	0.985196	0.992385	1374.14	1336.89	1257.9	1343.05	1332.68	1288.99	NSUN4
ENSG00000178429	0.00560061	1.00389	0.98519	0.992385	36.9028	47.4936	48.5051	35.876	51.6753	44.6404	RPS3AP5
ENSG00000005436	-0.00173417	0.998799	0.98512	0.992385	732.229	725.541	742.667	735.918	767.877	697.506	GCFC2
ENSG00000279656	0.00672783	1.00467	0.984997	0.992385	24.2782	27.2836	30.181	27.5969	29.9173	23.4362	AL132780.4
ENSG00000218502	0.00877061	1.0061	0.984822	0.992337	16.5092	14.147	16.1684	14.7184	17.2251	14.5081	H2AFZP3
ENSG00000145020	-0.00910776	0.993707	0.984765	0.992337	17.4803	23.2416	11.8568	15.6383	22.6646	14.5081	AMT
ENSG00000237296	-0.00740594	0.99488	0.984761	0.992337	64.0944	57.5986	22.6357	52.4341	40.7963	52.4524	SMG1P1
ENSG00000108679	-0.00119895	0.999169	0.984757	0.992337	14502.8	15172.7	15040.9	14879.3	14546.2	15329.5	LGALS3BP
ENSG00000179431	0.0025873	1.00179	0.984666	0.992337	1089.6	1234.83	1542.46	1311.77	1286.44	1259.97	FJX1
ENSG00000187650	-0.00403979	0.997204	0.984656	0.992337	139.842	187.953	116.412	155.463	150.493	139.501	VMAC
ENSG00000140299	0.00153766	1.00107	0.984594	0.992337	3341.65	3243.71	2950.19	3173.65	3205.68	3147.15	BNIP2
ENSG00000124383	0.00252577	1.00175	0.984562	0.992337	1562.54	1472.3	2024.28	1723.89	1680.81	1643.88	MPHOSPH10
ENSG00000113312	0.00259676	1.0018	0.984415	0.992337	1400.36	1314.66	1814.09	1528.87	1549.35	1440.77	TTC1
ENSG00000224116	0.0109996	1.00765	0.984168	0.99221	16.5092	14.147	9.70102	19.3178	12.6922	7.81207	INHBA-AS1
ENSG00000162614	-0.00454975	0.996851	0.984148	0.99221	908.974	915.515	1766.66	1168.27	1255.62	1177.39	NEXN
ENSG00000164961	-0.00182176	0.998738	0.984099	0.99221	3881.59	3834.86	3343.62	3870.01	3534.77	3670.55	WASHC5
ENSG00000149016	0.00252555	1.00175	0.984078	0.99221	366.115	420.369	459.182	405.675	427.001	409.575	TUT1
ENSG00000111879	0.00377239	1.00262	0.983708	0.991983	142.756	146.523	119.646	150.863	135.988	120.529	FAM184A
ENSG00000182866	-0.0105362	0.992723	0.983497	0.99183	16.5092	13.1365	11.8568	17.478	9.97243	14.5081	LCK
ENSG00000275532	0.012263	1.00854	0.983487	0.99183	10.6824	21.2205	8.62313	7.35918	16.3185	16.7401	AC006449.2
ENSG00000181896	-0.00267033	0.998151	0.983465	0.99183	448.66	408.243	494.752	449.83	490.462	411.807	ZNF101
ENSG00000104936	-0.00209392	0.99855	0.983278	0.991786	1747.06	1753.22	2059.85	1780.92	1837.65	1949.67	DMPK
ENSG00000261366	-0.0130582	0.99099	0.983202	0.991769	12.6246	13.1365	5.38946	7.35918	9.97243	14.5081	MANEA-AS1
ENSG00000061936	-0.00213306	0.998523	0.983175	0.991769	1703.36	1861.35	2108.36	1928.1	1876.63	1874.9	SFSWAP
ENSG00000262227	-0.0138553	0.990442	0.983093	0.991769	20.3937	8.08402	5.38946	8.27908	11.7856	14.5081	AC004771.3
ENSG00000081041	0.0212922	1.01487	0.983091	0.991769	244.724	266.773	331.991	115.907	663.62	51.3364	CXCL2
ENSG00000059758	-0.00245841	0.998297	0.982858	0.991659	897.321	866	724.343	798.471	824.086	871.603	CDK17
ENSG00000139266	-0.00230634	0.998403	0.982638	0.991496	755.536	754.845	729.732	754.316	677.219	814.687	2020-03-09
ENSG00000198689	-0.00265711	0.99816	0.982493	0.991408	1151.76	1239.89	953.934	1143.43	1046.2	1164	SLC9A6
ENSG00000132475	-0.00194881	0.99865	0.982467	0.991408	18253.3	18540.7	21586.9	19350	19776.2	19331.5	H3F3B
ENSG00000120509	-0.00218828	0.998484	0.982345	0.991378	1134.28	1068.1	1243.89	1198.63	1085.18	1167.35	PDZD11
ENSG00000178440	-0.0109787	0.992419	0.982183	0.991273	18.4514	22.2311	9.70102	17.478	13.5988	20.0882	LINC00843
ENSG00000174912	0.0122127	1.0085	0.981916	0.991063	19.4225	20.21	7.54524	18.3979	10.879	17.8562	METTL15P1
ENSG00000100591	0.00346197	1.0024	0.981542	0.990745	3128.97	2997.15	4460.31	3520.45	3494.88	3544.45	AHSA1
ENSG00000196275	-0.00354152	0.997548	0.981505	0.990745	192.283	187.953	204.799	202.377	174.971	209.81	GTF2IRD2
ENSG00000261766	0.0156937	1.01094	0.981493	0.990745	14.5669	10.105	7.54524	11.9587	3.62634	16.7401	AC133550.2
ENSG00000197345	-0.00393557	0.997276	0.981372	0.990745	731.258	733.625	1110.23	894.14	834.058	852.631	MRPL21
ENSG00000272030	-0.0094766	0.993453	0.981127	0.990562	30.1049	20.21	23.7136	18.3979	25.3844	31.2483	AL162258.2
ENSG00000279191	0.0126846	1.00883	0.981124	0.990562	9.71127	15.1575	12.9347	10.1189	10.879	16.7401	AC068491.4
ENSG00000198837	0.00218827	1.00152	0.980645	0.990195	1906.32	2044.25	1787.14	1900.51	1822.24	2008.82	DENND4B
ENSG00000242088	-0.014916	0.989714	0.980587	0.990195	15.538	12.126	5.38946	11.0388	14.5054	7.81207	AC090602.1
ENSG00000215199	0.0123833	1.00862	0.980406	0.990071	20.3937	13.1365	10.7789	12.8786	13.5988	17.8562	YWHAZP6
ENSG00000196531	0.00273451	1.0019	0.980204	0.989927	11641.9	11797.6	14862	12665.1	12934.2	12627.6	NACA
ENSG00000270049	0.00731194	1.00508	0.979957	0.989736	48.5563	40.4201	42.0378	36.7959	48.049	45.7564	AC009061.2
ENSG00000247595	0.00911354	1.00634	0.9799	0.989736	24.2782	30.3151	28.0252	27.5969	31.7305	22.3202	SPTY2D1OS
ENSG00000272807	0.0100861	1.00702	0.979839	0.989736	29.1338	20.21	20.4799	23.9173	26.291	18.9722	AC007038.2
ENSG00000261221	-0.00325246	0.997748	0.979705	0.989659	827.4	1023.64	924.831	983.37	808.674	991.016	ZNF865
ENSG00000269937	-0.0115808	0.992005	0.979668	0.989659	19.4225	24.2521	11.8568	20.2377	19.0383	16.7401	AC093525.7
ENSG00000067225	0.00221414	1.00154	0.979596	0.989659	106470	113516	126680	115464	112729	117941	PKM
ENSG00000148384	0.00221884	1.00154	0.979388	0.989516	1599.45	1616.8	1496.11	1589.58	1478.64	1639.42	INPP5E
ENSG00000088205	0.00240852	1.00167	0.979329	0.989515	4949.83	4964.6	5822.77	5317.93	5357.01	5033.2	DDX18
ENSG00000164338	-0.00323125	0.997763	0.979287	0.989515	503.044	495.146	565.893	543.659	560.269	460.912	UTP15
ENSG00000283390	0.0123925	1.00863	0.979132	0.989435	17.4803	11.1155	21.5578	18.3979	14.5054	16.7401	AC068631.3
ENSG00000183763	-0.00369777	0.99744	0.978946	0.989306	538.004	495.146	656.436	574.016	606.505	511.132	TRAIP
ENSG00000165171	0.00878073	1.0061	0.978945	0.989306	61.181	51.5356	31.2589	57.9535	40.7963	44.6404	METTL27
ENSG00000160075	-0.00366536	0.997463	0.978876	0.989306	3160.05	3331.63	4516.36	3755.02	3703.4	3575.69	SSU72
ENSG00000082196	0.00820759	1.00571	0.978743	0.989279	61.181	41.4306	37.7262	44.1551	42.6095	53.5685	C1QTNF3
ENSG00000141446	-0.00295524	0.997954	0.978667	0.989261	958.502	931.683	775.004	885.861	902.052	883.879	ESCO1
ENSG00000272335	-0.00426232	0.99705	0.978656	0.989261	221.417	175.827	185.397	186.739	204.888	193.07	AC093297.2
ENSG00000239900	-0.00276291	0.998087	0.978575	0.989261	2591.94	2827.39	3261.7	2944.59	2867.53	2883.77	ADSL
ENSG00000244313	0.0069482	1.00483	0.978499	0.989261	94.1993	74.7772	134.736	86.4703	105.164	110.485	AC024293.1
ENSG00000184083	0.00463172	1.00322	0.978311	0.989137	696.298	556.787	447.325	628.29	529.446	537.917	FAM120C
ENSG00000235363	0.00577485	1.00401	0.978142	0.989026	160.236	119.239	201.566	156.383	160.466	161.821	SNRPGP10
ENSG00000197535	-0.00429701	0.997026	0.978019	0.988961	3353.3	3406.4	2260.34	3148.81	2795	3104.74	MYO5A
ENSG00000277938	-0.0149365	0.9897	0.977834	0.988833	9.71127	12.126	11.8568	11.0388	11.7856	11.1601	AL035252.3
ENSG00000269176	0.0106615	1.00742	0.977748	0.988805	28.1627	23.2416	25.8694	21.1576	22.6646	33.4803	AP001160.3
ENSG00000199753	0.00616825	1.00428	0.97773	0.988805	101.968	89.9347	128.269	122.346	94.2848	101.557	SNORD104
ENSG00000111897	0.00276862	1.00192	0.977685	0.988805	5050.83	5142.45	4195.15	4801.86	4849.32	4710.68	SERINC1
ENSG00000118689	0.00351202	1.00244	0.977632	0.988805	2987.19	3099.21	2277.58	2816.73	2716.13	2812.34	FOXO3
ENSG00000163812	-0.00214618	0.998513	0.977562	0.988805	2034.51	2023.03	2194.59	2093.69	2052.51	2114.84	ZDHHC3
ENSG00000066933	-0.00410393	0.997159	0.977516	0.988805	1849.02	1943.2	1325.81	1765.28	1735.2	1632.72	MYO9A
ENSG00000234645	0.0141115	1.00983	0.977444	0.988805	10.6824	20.21	14.0126	16.5582	15.4119	12.2761	YWHAEP5
ENSG00000260423	-0.0128639	0.991123	0.977382	0.988805	13.5958	20.21	17.2463	14.7184	19.9449	16.7401	LINC02367
ENSG00000052723	0.00275783	1.00191	0.977339	0.988805	2694.88	2541.41	2223.69	2436.81	2574.7	2435.13	SIKE1
ENSG00000272767	-0.007561	0.994773	0.977317	0.988805	54.3831	69.7247	49.583	52.4341	65.2741	56.9165	JMJD1C-AS1
ENSG00000172731	0.00286045	1.00198	0.977125	0.988766	900.234	837.706	868.78	942.895	823.179	834.775	LRRC20
ENSG00000251141	-0.0101602	0.992982	0.976974	0.988673	55.3542	26.2731	52.8167	43.2352	38.9832	53.5685	MRPS30-DT
ENSG00000112306	-0.00363549	0.997483	0.976947	0.988673	15194.2	15924.5	20819.5	17563.6	16877	17627.4	RPS12
ENSG00000171469	0.00315508	1.00219	0.976923	0.988673	552.571	510.304	485.051	511.463	538.511	494.392	ZNF561
ENSG00000210154	-0.0120402	0.991689	0.976921	0.988673	25.2493	29.3046	33.4146	45.075	20.8515	22.3202	MT-TD
ENSG00000180389	0.0147201	1.01026	0.976858	0.988673	13.5958	13.1365	30.181	14.7184	24.4778	16.7401	ATP5F1EP2
ENSG00000186642	0.00999161	1.00695	0.976554	0.988544	43.7007	55.5776	30.181	45.9949	49.8622	32.3643	PDE2A
ENSG00000225234	-0.0148036	0.989791	0.976474	0.988522	12.6246	25.2626	12.9347	22.0775	13.5988	15.6241	TRAPPC12-AS1
ENSG00000265688	0.00460002	1.00319	0.976372	0.988478	255.406	304.161	322.29	309.085	315.492	252.218	MAFG-AS1
ENSG00000238186	0.01454	1.01013	0.976251	0.988415	16.5092	21.2205	10.7789	17.478	18.1317	12.2761	AL603839.2
ENSG00000249193	0.0137844	1.0096	0.976234	0.988415	21.3648	15.1575	18.3242	14.7184	14.5054	25.6682	HSPD1P5
ENSG00000087448	0.00268236	1.00186	0.975911	0.988189	920.628	887.221	836.444	877.582	875.761	887.227	KLHL42
ENSG00000164776	-0.00889318	0.993855	0.975606	0.987939	53.412	42.4411	76.5303	54.2739	60.7412	58.0325	PHKG1
ENSG00000198015	0.00283126	1.00196	0.975597	0.987939	1849.02	1795.66	1988.71	1906.03	1985.42	1727.58	MRPL42
ENSG00000198924	-0.0034208	0.997632	0.975534	0.987939	976.953	963.009	799.795	953.934	878.481	915.128	DCLRE1A
ENSG00000225082	0.0175251	1.01222	0.975493	0.987939	9.71127	10.105	16.1684	7.35918	12.6922	15.6241	DAP3P1
ENSG00000188641	0.00410905	1.00285	0.975085	0.987648	1032.31	1041.83	773.926	955.773	934.689	950.84	DPYD
ENSG00000269559	-0.0140264	0.990325	0.97493	0.98755	15.538	27.2836	15.0905	18.3979	19.0383	21.2042	AC093677.2
ENSG00000138640	-0.00520389	0.996399	0.974573	0.987248	505.957	486.052	339.536	429.592	456.012	451.984	FAM13A
ENSG00000185269	0.0131927	1.00919	0.974547	0.987248	25.2493	24.2521	28.0252	35.876	16.3185	24.5522	NOTUM
ENSG00000214413	0.00311223	1.00216	0.974322	0.987112	782.728	736.656	749.135	732.238	805.047	725.406	BBIP1
ENSG00000137693	-0.00442451	0.996938	0.973862	0.986705	4608	4671.55	3318.83	4302.36	4206.55	4129.23	YAP1
ENSG00000257074	-0.0175889	0.987882	0.97355	0.986448	10.6824	14.147	15.0905	18.3979	12.6922	8.92808	RPL29P33
ENSG00000099822	-0.00604219	0.995821	0.973488	0.986444	143.727	177.848	198.332	184.899	155.026	181.91	HCN2
ENSG00000279483	0.0083391	1.0058	0.973451	0.986444	87.4014	83.8717	137.97	115.907	97.9112	92.6288	AC090498.1
ENSG00000145916	0.00316073	1.00219	0.973248	0.98632	672.02	664.911	709.253	655.887	691.724	694.158	RMND5B
ENSG00000256210	0.0210716	1.01471	0.973162	0.986291	9.71127	11.1155	12.9347	17.478	10.879	4.46404	AC005255.1
ENSG00000128596	-0.00346581	0.997601	0.973113	0.986291	527.322	567.902	513.076	524.341	538.511	550.193	CCDC136
ENSG00000257681	0.015278	1.01065	0.97302	0.986266	29.1338	23.2416	14.0126	22.9974	15.4119	27.9002	AC025265.1
ENSG00000222937	-0.0149882	0.989665	0.972942	0.986246	20.3937	19.1995	14.0126	21.1576	16.3185	16.7401	SNORD63B
ENSG00000219451	-0.0104124	0.992809	0.972882	0.986244	33.0183	44.4621	44.1935	35.876	46.2358	40.1763	RPL23P8
ENSG00000164405	0.00512501	1.00356	0.972882	0.986244	2610.39	2723.3	3891.19	3008.98	3076.04	3105.85	UQCRQ
ENSG00000228463	-0.0165357	0.988604	0.972682	0.98616	12.6246	20.21	17.2463	22.0775	11.7856	16.7401	AP006222.1
ENSG00000240489	-0.00659806	0.995437	0.972484	0.986019	113.622	119.239	141.204	114.987	140.521	119.413	SETP14
ENSG00000096717	0.00399003	1.00277	0.972341	0.985932	1345.01	1308.6	1058.49	1278.66	1195.79	1228.73	SIRT1
ENSG00000148832	0.00642308	1.00446	0.972258	0.985908	127.218	140.46	157.372	128.786	133.268	161.821	PAOX
ENSG00000235587	0.00838747	1.00583	0.972056	0.985761	69.9211	71.7457	93.7766	80.951	86.1256	65.8446	GAPDHP65
ENSG00000257497	0.0115038	1.00801	0.972046	0.985761	53.412	36.3781	35.5704	49.6745	32.6371	42.4084	AC121761.1
ENSG00000198815	0.00308718	1.00214	0.971791	0.985612	2637.58	2687.94	2323.93	2574.79	2487.67	2572.4	FOXJ3
ENSG00000235677	0.0171086	1.01193	0.971773	0.985612	31.0761	12.126	18.3242	25.7571	17.2251	17.8562	NPM1P26
ENSG00000269974	0.0141652	1.00987	0.971758	0.985612	25.2493	30.3151	18.3242	22.9974	29.9173	20.0882	AC091057.3
ENSG00000004766	-0.00323535	0.99776	0.971665	0.985612	1113.88	1037.79	991.66	1087.32	1045.29	1017.8	VPS50
ENSG00000161180	-0.0175737	0.987893	0.97151	0.985563	23.307	9.09452	31.2589	21.1576	20.8515	22.3202	CCDC116
ENSG00000166823	-0.0126808	0.991249	0.971341	0.985451	22.3359	41.4306	36.6483	34.9561	32.6371	33.4803	MESP1
ENSG00000105568	0.00381946	1.00265	0.971305	0.985451	7961.3	8321.49	10054.6	9012.23	8413.11	8841.03	PPP2R1A
ENSG00000213609	-0.0113753	0.992146	0.971106	0.98533	56.3253	46.4831	67.9072	77.2714	52.5819	41.2923	RPL7AP50
ENSG00000147535	0.00402077	1.00279	0.971066	0.98533	629.29	667.942	689.85	593.334	688.098	700.854	PLPP5
ENSG00000181544	-0.00554217	0.996166	0.970886	0.985226	213.648	229.384	191.865	230.894	208.515	197.534	FANCB
ENSG00000237718	-0.0214728	0.985226	0.970866	0.985226	18.4514	7.07352	9.70102	14.7184	9.97243	11.1601	AC009095.1
ENSG00000261840	0.0112204	1.00781	0.970805	0.985226	76.719	84.8822	40.9599	74.5117	58.928	68.0766	AC093249.6
ENSG00000142867	-0.00381523	0.997359	0.970726	0.985226	1133.3	1228.77	1377.55	1207.83	1310.02	1229.84	BCL10
ENSG00000140678	0.0209244	1.01461	0.970688	0.985226	9.71127	24.2521	10.7789	9.19897	17.2251	17.8562	ITGAX
ENSG00000163512	-0.00332629	0.997697	0.970665	0.985226	737.085	702.299	750.212	727.639	726.175	741.03	AZI2
ENSG00000277559	0.0119166	1.00829	0.970601	0.985226	40.7873	33.3466	36.6483	30.3566	34.4502	45.7564	AC018553.1
ENSG00000269888	0.0162456	1.01132	0.970529	0.985226	20.3937	13.1365	22.6357	18.3979	18.1317	18.9722	AC112491.1
ENSG00000226549	-0.0197268	0.98642	0.970529	0.985226	18.4514	20.21	7.54524	17.478	18.1317	11.1601	SCDP1
ENSG00000187024	0.020355	1.01421	0.970324	0.985187	12.6246	13.1365	9.70102	8.27908	14.5054	12.2761	PTRH1
ENSG00000243680	0.0164711	1.01148	0.969837	0.984752	20.3937	18.189	17.2463	22.9974	15.4119	16.7401	RPL37P23
ENSG00000205571	0.00794027	1.00552	0.969746	0.984719	129.16	103.071	145.515	127.866	140.521	106.021	SMN2
ENSG00000103353	0.00250945	1.00174	0.969506	0.984534	4003.95	4115.78	3962.33	4001.55	3940.02	4121.42	UBFD1
ENSG00000234769	0.0160389	1.01118	0.969321	0.984406	16.5092	20.21	31.2589	22.9974	22.6646	21.2042	WASH4P
ENSG00000185090	-0.00414797	0.997129	0.969057	0.984197	1246.93	1334.87	1490.72	1459.88	1262.87	1360.42	MANEAL
ENSG00000172817	0.0137584	1.00958	0.969006	0.984197	61.181	42.4411	29.1031	35.876	53.4885	42.4084	CYP7B1
ENSG00000163072	-0.0107953	0.992545	0.968997	0.984197	55.3542	44.4621	51.7388	43.2352	49.8622	60.2645	NOSTRIN
ENSG00000133392	0.0146536	1.01021	0.96894	0.984197	47.5852	31.3256	21.5578	33.1163	35.3568	31.2483	MYH11
ENSG00000233762	0.00820122	1.0057	0.968714	0.984084	150.525	142.481	222.046	154.543	173.158	184.142	AC007969.1
ENSG00000120555	0.0207477	1.01449	0.968648	0.984077	17.4803	16.168	7.54524	13.7985	13.5988	13.3921	SEPT7P9
ENSG00000162695	0.00372544	1.00259	0.968588	0.984075	2637.58	2456.53	2189.2	2397.25	2492.2	2375.98	SLC30A7
ENSG00000244041	0.0115071	1.00801	0.968524	0.984069	52.4408	40.4201	46.3493	37.7158	52.5819	47.9884	LINC01011
ENSG00000220749	-0.01327	0.990844	0.968512	0.984069	36.9028	38.3991	66.8293	38.6357	55.3017	49.1044	RPL21P28
ENSG00000002079	0.0143542	1.01	0.968495	0.984069	26.2204	28.2941	29.1031	21.1576	32.6371	29.0162	MYH16
ENSG00000112365	-0.00483095	0.996657	0.968165	0.983882	635.117	696.236	546.491	653.127	604.692	627.197	ZBTB24
ENSG00000258682	0.0196964	1.01375	0.968011	0.983785	18.4514	14.147	14.0126	19.3178	16.3185	10.0441	AL132989.1
ENSG00000213144	-0.00858005	0.99407	0.967989	0.983785	88.3725	87.9137	109.945	91.9897	87.0322	109.369	AC084880.1
ENSG00000111358	0.00319967	1.00222	0.967943	0.983785	1690.73	1759.28	1641.63	1703.65	1751.52	1623.79	GTF2H3
ENSG00000219133	-0.0214244	0.985259	0.967879	0.983785	11.6535	11.1155	17.2463	10.1189	11.7856	18.9722	AL592114.1
ENSG00000115310	0.00267633	1.00186	0.967674	0.983679	32683.3	33847.8	35440	34125.4	33129.3	34527.1	RTN4
ENSG00000177311	0.00627177	1.00436	0.967329	0.983387	7961.3	7765.71	5220.23	7182.56	6741.37	6933.77	ZBTB38
ENSG00000203666	0.0105044	1.00731	0.966969	0.98308	76.719	95.9977	99.166	109.468	94.2848	64.7285	EFCAB2
ENSG00000249628	-0.0321859	0.977937	0.966784	0.982951	15.538	5.05251	17.2463	2.75969	23.5712	12.2761	LINC00942
ENSG00000225264	-0.0126729	0.991254	0.966739	0.982951	51.4697	52.5461	40.9599	62.553	45.3292	37.9443	ZNRF2P2
ENSG00000198198	0.00721755	1.00502	0.966732	0.982951	2004.41	2043.24	1285.92	1722.05	1637.29	1949.67	SZT2
ENSG00000126214	0.00354415	1.00246	0.96672	0.982951	1372.2	1380.35	1486.41	1354.09	1470.48	1402.82	KLC1
ENSG00000061794	-0.00410492	0.997159	0.966327	0.982723	2027.71	2029.09	2383.22	2184.76	2212.97	2057.92	MRPS35
ENSG00000213493	0.0190128	1.01327	0.96617	0.982623	18.4514	21.2205	14.0126	17.478	20.8515	14.5081	ACTN4P1
ENSG00000179134	0.00406878	1.00282	0.966077	0.982587	3807.79	4138.01	3472.97	4021.79	3604.58	3760.95	SAMD4B
ENSG00000249485	0.0205611	1.01435	0.965953	0.98252	21.3648	16.168	12.9347	20.2377	18.1317	11.1601	RBBP4P1
ENSG00000268350	-0.0184009	0.987326	0.965943	0.98252	21.3648	18.189	16.1684	21.1576	15.4119	20.0882	FAM156A
ENSG00000240990	-0.011198	0.992268	0.965889	0.98252	110.708	91.9557	98.0881	91.9897	74.34	138.385	HOXA11-AS
ENSG00000280211	-0.018264	0.98742	0.965886	0.98252	19.4225	16.168	20.4799	16.5582	18.1317	22.3202	AC106886.4
ENSG00000118058	-0.00671162	0.995359	0.965787	0.98252	5653.9	5293.01	3600.16	5010.68	4748.69	4856.87	KMT2A
ENSG00000277290	-0.0274476	0.981155	0.965725	0.98252	17.4803	6.06301	7.54524	9.19897	13.5988	8.92808	AC136475.10
ENSG00000170325	-0.00519961	0.996402	0.965685	0.98252	531.206	563.86	452.714	503.184	514.94	536.801	PRDM10
ENSG00000218510	0.00595229	1.00413	0.965559	0.98252	290.367	369.844	310.433	318.284	329.997	318.063	LINC00339
ENSG00000125388	-0.0087686	0.993941	0.965404	0.982435	97.1127	124.292	132.581	107.628	129.642	118.297	GRK4
ENSG00000135334	-0.00340142	0.997645	0.965339	0.982428	1400.36	1428.85	1489.65	1433.2	1414.27	1482.06	AKIRIN2
ENSG00000228043	-0.0162201	0.98882	0.965276	0.982423	25.2493	23.2416	22.6357	22.9974	24.4778	24.5522	AC114763.1
ENSG00000176386	0.00687431	1.00478	0.965248	0.982423	369.999	378.938	524.933	429.592	415.216	421.852	CDC26
ENSG00000085982	-0.00347577	0.997594	0.965194	0.982423	2119	2250.39	2009.19	2156.24	2138.63	2099.21	USP40
ENSG00000058272	0.00342173	1.00237	0.965172	0.982423	3772.83	3470.06	3762.92	3682.35	3803.12	3491.99	PPP1R12A
ENSG00000176473	0.00963268	1.0067	0.96517	0.982423	108.766	157.638	145.515	162.822	132.361	112.717	WDR25
ENSG00000141522	-0.00512559	0.996454	0.964932	0.982368	10328.9	11214.6	13608.4	12191.4	11010.5	12074.1	ARHGDIA
ENSG00000179148	-0.0274621	0.981145	0.964764	0.982256	22.3359	8.08402	10.7789	9.19897	22.6646	10.0441	ALOXE3
ENSG00000101442	0.00614579	1.00427	0.964655	0.982205	501.101	491.104	638.112	523.422	513.127	587.021	ACTR5
ENSG00000263680	0.0258579	1.01808	0.963876	0.981471	7.76901	13.1365	11.8568	8.27908	12.6922	11.1601	AC007639.1
ENSG00000024526	0.00382833	1.00266	0.963875	0.981471	4487.58	4378.51	3882.56	4267.4	4309.9	4138.16	DEPDC1
ENSG00000220583	0.0176254	1.01229	0.963829	0.981471	23.307	19.1995	32.3367	23.9173	26.291	23.4362	RPL35P2
ENSG00000213889	0.0127086	1.00885	0.963598	0.981365	49.5275	45.4726	52.8167	53.354	39.8897	53.5685	PPM1N
ENSG00000225643	-0.0251126	0.982744	0.963456	0.98128	12.6246	13.1365	8.62313	13.7985	9.06585	12.2761	AL606491.1
ENSG00000115268	-0.00638635	0.995583	0.963426	0.98128	15160.3	16400.5	22014.9	18022.6	17149	18640.7	RPS15
ENSG00000093100	0.0241222	1.01686	0.963303	0.981242	31.0761	17.1785	8.62313	17.478	20.8515	17.8562	AC016026.1
ENSG00000273369	-0.0255098	0.982473	0.963013	0.981006	14.5669	10.105	10.7789	14.7184	8.15926	13.3921	AC096586.2
ENSG00000213406	0.0150065	1.01046	0.962973	0.981006	31.0761	31.3256	36.6483	33.1163	34.4502	30.1323	ANXA2P1
ENSG00000171044	-0.00826497	0.994288	0.962843	0.980951	114.593	120.25	130.425	119.587	127.828	119.413	XKR6
ENSG00000119689	-0.00319044	0.997791	0.962574	0.980736	2479.29	2510.09	2501.79	2554.55	2442.34	2511.02	DLST
ENSG00000223773	0.0111083	1.00773	0.962487	0.980706	78.6613	130.355	95.9323	106.708	100.631	94.8608	CD99P1
ENSG00000206532	0.0279784	1.01958	0.962184	0.980456	10.6824	16.168	9.70102	10.1189	7.25268	18.9722	AC117402.1
ENSG00000278867	0.0283385	1.01984	0.962168	0.980456	14.5669	7.07352	9.70102	10.1189	12.6922	7.81207	AC090616.6
ENSG00000280710	-0.0251189	0.98274	0.962083	0.980456	13.5958	24.2521	14.0126	16.5582	9.97243	26.7842	AL139035.1
ENSG00000115541	0.00739316	1.00514	0.961866	0.98031	5608.26	5531.49	8303	6502.75	6544.64	6294.29	HSPE1
ENSG00000258388	-0.0127079	0.99123	0.961828	0.98031	58.2676	47.4936	49.583	46.9148	54.3951	55.8005	PPT2-EGFL8
ENSG00000265817	0.0148138	1.01032	0.96176	0.98031	74.7767	81.8507	39.882	74.5117	58.928	61.3805	FSBP
ENSG00000204599	-0.00614842	0.995747	0.96162	0.980237	303.963	334.476	349.237	353.241	310.959	326.991	TRIM39
ENSG00000250321	0.0262474	1.01836	0.961614	0.980237	17.4803	9.09452	10.7789	11.0388	14.5054	11.1601	AC079140.2
ENSG00000173674	0.00528162	1.00367	0.961211	0.979938	4177.79	3979.36	4963.69	4388.83	4609.98	4071.2	EIF1AX
ENSG00000164252	-0.004321	0.997009	0.9612	0.979938	1045.9	951.893	958.245	986.13	1009.03	969.812	AGGF1
ENSG00000174564	-0.0131988	0.990893	0.960992	0.979832	47.5852	50.5251	63.5956	61.6331	50.7688	50.2204	IL20RB
ENSG00000088543	-0.0134397	0.990728	0.96093	0.979828	78.6613	55.5776	52.8167	59.7933	55.3017	74.7726	C3orf18
ENSG00000213371	-0.0273069	0.98125	0.960765	0.97972	11.6535	9.09452	15.0905	14.7184	13.5988	7.81207	NAP1L1P3
ENSG00000099783	-0.00605893	0.995809	0.960622	0.979633	15006.8	15584	20267.6	17233.4	16627.7	17210	HNRNPM
ENSG00000168758	0.00449579	1.00312	0.960529	0.979597	1813.09	1979.57	1741.87	1865.55	1734.3	1919.54	SEMA4C
ENSG00000177469	-0.00563968	0.996098	0.960514	0.979597	20613.1	22164.4	27276	23656.1	22845.9	23824.6	CAVIN1
ENSG00000272509	0.0292702	1.0205	0.960394	0.979578	10.6824	17.1785	6.46735	11.9587	12.6922	8.92808	AC087752.4
ENSG00000225706	0.011826	1.00823	0.960365	0.979578	100.026	145.512	100.244	106.708	97.9112	139.501	PTPRD-AS1
ENSG00000157017	-0.0316525	0.978299	0.960103	0.979399	18.4514	11.1155	6.46735	9.19897	8.15926	20.0882	GHRL
ENSG00000139343	0.00693163	1.00482	0.959976	0.979329	1707.24	1660.26	2329.32	1904.19	1901.11	1862.62	SNRPF
ENSG00000085978	0.00372869	1.00259	0.959972	0.979329	1678.11	1681.48	1768.82	1730.33	1690.78	1692.99	ATG16L1
ENSG00000231169	-0.0247836	0.982968	0.959969	0.979329	16.5092	19.1995	14.0126	16.5582	23.5712	10.0441	EEF1B2P1
ENSG00000233122	-0.0223884	0.984601	0.959756	0.979281	26.2204	20.21	12.9347	21.1576	17.2251	22.3202	CTAGE7P
ENSG00000109572	-0.00588408	0.99593	0.959739	0.979281	3660.18	3648.92	2843.48	3564.6	3308.13	3322.36	CLCN3
ENSG00000187186	0.0210863	1.01472	0.959736	0.979281	17.4803	28.2941	18.3242	19.3178	22.6646	21.2042	AL162231.1
ENSG00000198945	0.0090447	1.00629	0.959447	0.979143	191.312	162.691	141.204	150.863	170.438	171.865	L3MBTL3
ENSG00000078674	0.00616604	1.00428	0.959413	0.979143	3172.67	3195.21	2427.41	3010.82	2936.43	2811.23	PCM1
ENSG00000260259	-0.0229476	0.98422	0.95934	0.979143	21.3648	22.2311	36.6483	14.7184	34.4502	32.3643	LINC02166
ENSG00000198804	-0.00496991	0.996561	0.959297	0.979143	314475	300151	256284	281355	287923	304639	MT-CO1
ENSG00000243160	0.0223442	1.01561	0.959256	0.979143	21.3648	18.189	25.8694	29.4367	19.9449	14.5081	AC093270.2
ENSG00000139410	-0.00722815	0.995002	0.95918	0.979143	386.508	425.421	481.817	478.347	381.672	439.708	SDSL
ENSG00000177084	-0.00441587	0.996944	0.959142	0.979143	4694.43	4803.93	4173.6	4565.45	4401.47	4749.74	POLE
ENSG00000249936	-0.00701565	0.995149	0.959126	0.979143	349.606	367.823	454.87	396.476	384.392	396.183	RAC1P2
ENSG00000213881	-0.0209713	0.985569	0.958979	0.979138	29.1338	27.2836	60.3619	35.876	51.6753	30.1323	NPM1P6
ENSG00000137504	0.00617818	1.00429	0.958904	0.979122	2164.64	2107.91	1651.33	1908.79	1941.9	2050.11	CREBZF
ENSG00000113070	0.0238282	1.01665	0.958815	0.979089	271.915	296.077	720.031	452.589	428.815	385.023	HBEGF
ENSG00000226986	0.0402297	1.02828	0.958782	0.979089	15.538	14.147	7.54524	8.27908	25.3844	2.23202	AC092017.1
ENSG00000123728	0.00491296	1.00341	0.958727	0.979089	1623.72	1594.57	1423.89	1567.51	1612.81	1445.23	RAP2C
ENSG00000239719	0.0234395	1.01638	0.958675	0.979089	11.6535	23.2416	23.7136	18.3979	19.0383	20.0882	AC004890.1
ENSG00000086475	0.00443202	1.00308	0.958562	0.979068	3584.43	3884.37	4208.09	3838.73	3903.75	3897.1	SEPHS1
ENSG00000153956	0.00964348	1.00671	0.958422	0.978984	590.445	524.451	366.483	540.9	503.155	427.432	CACNA2D1
ENSG00000197421	0.0361197	1.02535	0.958093	0.978707	8.74014	12.126	12.9347	9.19897	19.9449	3.34803	GGT3P
ENSG00000110274	-0.00445626	0.996916	0.957799	0.978466	1193.51	1188.35	1296.7	1202.31	1243.83	1243.23	CEP164
ENSG00000164845	-0.018905	0.986982	0.95776	0.978466	33.0183	27.2836	56.0504	43.2352	36.2634	37.9443	FAM86FP
ENSG00000135535	-0.00407872	0.997177	0.957584	0.978364	9527.72	9575.52	8620.98	9256.93	9561.75	8983.88	CD164
ENSG00000176092	-0.0221278	0.984779	0.957417	0.978253	23.307	16.168	28.0252	24.8372	18.1317	25.6682	CRYBG2
ENSG00000111247	0.00514655	1.00357	0.956941	0.977826	1150.78	1105.49	1112.38	1116.76	1207.57	1030.08	RAD51AP1
ENSG00000147065	0.00442734	1.00307	0.956933	0.977826	31079	32826.2	28002.5	30566.3	30339.8	30721.5	MSN
ENSG00000107951	0.0050744	1.00352	0.956886	0.977826	1021.63	989.282	1132.86	1055.12	1063.42	1012.22	MTPAP
ENSG00000260367	0.0216972	1.01515	0.956847	0.977826	21.3648	24.2521	21.5578	26.677	17.2251	22.3202	AC109460.1
ENSG00000186020	0.00740142	1.00514	0.956709	0.977825	308.818	278.899	302.887	294.367	324.557	265.61	ZNF529
ENSG00000118596	0.0115884	1.00806	0.956632	0.977806	658.424	695.226	372.95	590.574	604.692	517.828	SLC16A7
ENSG00000121864	-0.00432051	0.99701	0.956622	0.977806	1301.31	1279.3	1243.89	1320.05	1265.59	1249.93	ZNF639
ENSG00000227398	-0.0167519	0.988456	0.956592	0.977806	76.719	66.6932	43.1157	46.9148	74.34	68.0766	KIF9-AS1
ENSG00000163947	-0.00726534	0.994977	0.956384	0.97773	324.356	289.004	273.784	301.726	281.041	310.251	ARHGEF3
ENSG00000261737	0.0221254	1.01545	0.956334	0.97773	26.2204	18.189	20.4799	20.2377	23.5712	20.0882	AL049597.2
ENSG00000188725	-0.00492753	0.99659	0.95624	0.9777	1334.33	1311.63	1467.01	1389.04	1425.15	1310.2	SMIM15
ENSG00000046647	-0.00706035	0.995118	0.956146	0.977664	361.259	430.474	421.456	391.876	386.205	441.94	GEMIN8
ENSG00000233016	0.00707345	1.00491	0.956082	0.977658	2458.89	2551.52	3350.09	2692.54	2836.7	2788.91	SNHG7
ENSG00000155858	0.00716875	1.00498	0.956022	0.977655	464.199	435.526	364.327	434.192	406.15	418.504	LSM11
ENSG00000162105	-0.0112884	0.992206	0.955864	0.977552	1224.59	1159.05	669.371	1065.24	922.903	1090.34	SHANK2
ENSG00000253683	0.0141447	1.00985	0.955575	0.977316	55.3542	50.5251	60.3619	51.5142	56.2083	56.9165	AC027309.2
ENSG00000082153	-0.00363323	0.997485	0.955549	0.977316	11548.6	11231.7	11917.2	11834.5	11718.5	11229.3	BZW1
ENSG00000246273	0.01895	1.01322	0.955399	0.977254	54.3831	41.4306	28.0252	34.9561	45.3292	42.4084	SBF2-AS1
ENSG00000254635	-0.00809471	0.994405	0.955163	0.977072	703.096	781.118	976.57	781.913	908.398	782.323	WAC-AS1
ENSG00000169951	0.00791429	1.0055	0.954877	0.976839	367.086	396.117	315.822	390.956	353.568	328.107	ZNF764
ENSG00000215305	0.00613515	1.00426	0.954829	0.976839	791.468	877.116	765.303	822.388	741.586	861.559	VPS16
ENSG00000146005	0.0222367	1.01553	0.954792	0.976839	42.7296	47.4936	18.3242	34.9561	34.4502	37.9443	PSD2
ENSG00000273064	-0.0316307	0.978314	0.954655	0.976789	7.76901	15.1575	12.9347	14.7184	12.6922	8.92808	AC017083.1
ENSG00000167995	0.031079	1.02178	0.954476	0.976665	11.6535	16.168	8.62313	11.9587	13.5988	10.0441	BEST1
ENSG00000260160	-0.0275518	0.981084	0.954206	0.976448	14.5669	16.168	20.4799	12.8786	24.4778	14.5081	AC011468.1
ENSG00000210151	0.0193138	1.01348	0.954118	0.976417	42.7296	34.3571	30.181	42.3153	35.3568	27.9002	MT-TS1
ENSG00000215021	0.00626733	1.00435	0.953913	0.976266	5778.2	6098.38	7399.72	6423.64	6213.73	6554.32	PHB2
ENSG00000101888	0.00804664	1.00559	0.95386	0.976266	668.135	699.268	629.489	636.569	781.476	565.817	NXT2
ENSG00000258940	-0.0282147	0.980633	0.953638	0.976103	11.6535	21.2205	17.2463	11.9587	18.1317	21.2042	AL132639.2
ENSG00000229419	0.043619	1.0307	0.953499	0.97602	14.5669	8.08402	9.70102	1.83979	16.3185	13.3921	RALGAPA1P1
ENSG00000136156	-0.00386673	0.997323	0.953433	0.976012	17061.7	16841	15731.8	16399	16619.5	16751.3	ITM2B
ENSG00000272760	-0.0211774	0.985428	0.953052	0.97568	51.4697	51.5356	28.0252	56.1137	45.3292	31.2483	AC093726.1
ENSG00000146963	-0.0043497	0.99699	0.952926	0.975611	2478.32	2374.68	2404.78	2530.64	2394.29	2353.66	LUC7L2
ENSG00000167780	0.0278613	1.0195	0.952905	0.975611	16.5092	22.2311	47.4272	33.1163	19.9449	31.2483	SOAT2
ENSG00000272374	-0.0257663	0.982299	0.952641	0.975437	17.4803	17.1785	19.402	20.2377	19.9449	14.5081	Z97832.2
ENSG00000007341	0.00626293	1.00435	0.952553	0.975406	459.343	459.779	490.441	461.788	484.116	456.448	ST7L
ENSG00000107862	-0.00569837	0.996058	0.95252	0.975406	5452.88	5751.78	4810.63	5382.32	5063.28	5635.85	GBF1
ENSG00000162461	-0.031016	0.978731	0.952519	0.975406	15.538	9.09452	15.0905	16.5582	12.6922	11.1601	SLC25A34
ENSG00000185046	-0.0201568	0.986126	0.952501	0.975406	33.9894	32.3361	26.9473	35.876	31.7305	26.7842	ANKS1B
ENSG00000200913	-0.021738	0.985045	0.952439	0.975406	24.2782	28.2941	31.2589	32.1964	21.758	31.2483	SNORD46
ENSG00000178852	-0.0103394	0.992859	0.95243	0.975406	159.265	135.407	129.347	137.985	147.773	141.733	EFCAB13
ENSG00000280018	0.0210583	1.0147	0.952308	0.975406	31.0761	34.3571	23.7136	29.4367	32.6371	25.6682	CU634019.6
ENSG00000268750	-0.0335087	0.977041	0.952241	0.975406	19.4225	14.147	6.46735	12.8786	11.7856	16.7401	AC010522.1
ENSG00000145191	-0.00616077	0.995739	0.952236	0.975406	1767.45	1954.31	2201.05	2011.82	1921.96	2013.28	EIF2B5
ENSG00000254469	-0.0148313	0.989772	0.952216	0.975406	58.2676	59.6196	67.9072	54.2739	63.4609	70.3086	AP002495.1
ENSG00000151445	-0.0068092	0.995291	0.952203	0.975406	595.301	520.409	509.843	574.936	528.539	530.104	VIPAS39
ENSG00000100554	0.00706175	1.00491	0.951938	0.975406	950.733	906.421	1156.58	986.13	980.018	1032.31	ATP6V1D
ENSG00000183172	-0.00832899	0.994243	0.951858	0.975404	395.249	402.18	503.375	462.708	406.15	438.592	SMDT1
ENSG00000129007	-0.0118605	0.991813	0.951797	0.9754	90.3148	95.9977	100.244	101.189	91.5651	95.9768	CALML4
ENSG00000269403	-0.035898	0.975424	0.951784	0.9754	12.6246	7.07352	20.4799	18.3979	14.5054	7.81207	AC008750.8
ENSG00000224543	-0.0183839	0.987338	0.951579	0.975295	42.7296	34.3571	49.583	41.3954	38.0766	49.1044	SNRPGP15
ENSG00000146373	0.0110374	1.00768	0.951548	0.975295	980.838	885.2	577.75	764.435	839.498	822.499	RNF217
ENSG00000114346	0.00582461	1.00405	0.951528	0.975295	9989.98	9712.95	8237.25	9332.36	9540.9	8954.86	ECT2
ENSG00000110315	-0.00589271	0.995924	0.951319	0.975205	1063.38	1132.77	995.972	1108.48	1093.34	1002.18	RNF141
ENSG00000163888	-0.0132111	0.990885	0.951273	0.975205	169.947	167.743	220.968	213.416	138.707	212.042	CAMK2N2
ENSG00000239246	-0.0377066	0.974202	0.951149	0.975149	6.79789	11.1155	19.402	16.5582	14.5054	6.69606	AC008026.1
ENSG00000258920	-0.0234246	0.983894	0.951023	0.975079	24.2782	27.2836	34.4925	33.1163	19.9449	34.5963	FOXN3-AS1
ENSG00000104957	-0.00576611	0.996011	0.950848	0.974959	999.289	951.893	1059.57	1003.61	960.073	1060.21	CCDC130
ENSG00000118369	0.0082487	1.00573	0.950812	0.974959	424.382	458.768	392.352	408.434	383.485	478.768	USP35
ENSG00000243819	-0.0296547	0.979655	0.950713	0.974939	16.5092	18.189	16.1684	10.1189	20.8515	21.2042	RN7SL832P
ENSG00000167333	-0.00783948	0.994581	0.950634	0.974918	369.999	388.033	341.692	393.716	377.139	333.687	TRIM68
ENSG00000067334	-0.00831117	0.994256	0.950597	0.974918	2732.75	2675.81	3701.48	3042.1	3146.76	2971.93	DNTTIP2
ENSG00000197279	-0.0141145	0.990264	0.950576	0.974918	70.8922	72.7562	65.7514	66.2326	77.0597	68.0766	ZNF165
ENSG00000077458	-0.0107143	0.992601	0.950566	0.974918	788.555	774.045	526.011	646.688	800.514	657.33	FAM76B
ENSG00000130751	-0.0347908	0.976173	0.950165	0.974673	8.74014	12.126	22.6357	15.6383	9.97243	18.9722	NPAS1
ENSG00000102103	-0.0108536	0.992505	0.94994	0.974501	1019.68	1063.05	1617.91	1251.98	1291.88	1182.97	PQBP1
ENSG00000162542	0.00681626	1.00474	0.949844	0.974462	1035.22	1210.58	1192.15	1142.51	1051.64	1228.73	TMCO4
ENSG00000152147	-0.01072	0.992597	0.949743	0.974418	436.036	378.938	582.061	491.225	485.93	428.548	GEMIN6
ENSG00000116574	0.0304495	1.02133	0.949742	0.974418	94.1993	54.5671	17.2463	55.1938	60.7412	46.8724	RHOU
ENSG00000134532	-0.0395858	0.972934	0.949561	0.974349	16.5092	15.1575	4.31157	8.27908	14.5054	14.5081	SOX5
ENSG00000242814	-0.0335393	0.97702	0.949558	0.974349	11.6535	10.105	22.6357	14.7184	11.7856	18.9722	AC113398.1
ENSG00000106404	0.00782264	1.00544	0.949482	0.974349	401.075	388.033	402.053	389.117	359.008	438.592	CLDN15
ENSG00000165898	-0.00806838	0.994423	0.949192	0.974148	452.545	418.348	474.272	505.024	417.029	429.664	ISCA2
ENSG00000280739	0.0207416	1.01448	0.949113	0.974126	30.1049	42.4411	36.6483	30.3566	36.2634	41.2923	EIF1B-AS1
ENSG00000101413	-0.00680436	0.995295	0.949033	0.974103	1742.2	1765.35	1428.21	1690.77	1624.6	1645	RPRD1B
ENSG00000167088	0.00960704	1.00668	0.949012	0.974103	2253.98	2261.5	3282.18	2583.99	2643.6	2516.6	SNRPD1
ENSG00000216775	0.0104025	1.00724	0.948673	0.973851	298.136	311.235	231.747	286.088	249.311	301.323	AL109918.1
ENSG00000135837	0.0112531	1.00783	0.948361	0.973591	2541.44	2374.68	1518.75	2195.79	2133.19	2056.81	CEP350
ENSG00000233325	-0.0225784	0.984472	0.948346	0.973591	46.6141	28.2941	39.882	43.2352	28.1041	45.7564	MIPEPP3
ENSG00000041988	-0.00811182	0.994393	0.948332	0.973591	343.779	356.707	400.976	356.92	394.364	354.891	THAP3
ENSG00000054967	0.00912421	1.00634	0.948224	0.973591	494.303	633.585	682.305	608.052	621.917	566.933	RELT
ENSG00000280123	-0.00780249	0.994606	0.948085	0.973544	504.015	454.726	469.961	439.711	526.726	469.84	AC023632.6
ENSG00000116984	0.00939319	1.00653	0.948038	0.973544	3421.28	3297.27	2342.26	3151.57	2901.98	2949.61	MTR
ENSG00000131873	-0.00629727	0.995645	0.947921	0.973493	2776.45	2834.46	2398.31	2770.73	2535.72	2739.8	CHSY1
ENSG00000233622	-0.040161	0.972546	0.947782	0.97341	15.538	15.1575	7.54524	5.51938	16.3185	17.8562	CYP2T1P
ENSG00000242588	-0.0227766	0.984336	0.947554	0.973235	248.608	239.489	85.1534	226.295	145.96	210.926	AC108010.1
ENSG00000233994	0.0324411	1.02274	0.947241	0.972973	14.5669	13.1365	21.5578	18.3979	10.879	18.9722	GDI2P2
ENSG00000257103	-0.00448869	0.996894	0.947233	0.972973	4592.46	4384.57	4314.8	4526.81	4465.84	4340.16	LSM14A
ENSG00000102393	-0.00763903	0.994719	0.947097	0.972943	977.924	1045.87	1252.51	1073.52	1120.54	1098.15	GLA
ENSG00000223509	0.0173861	1.01212	0.947015	0.972918	162.178	136.418	82.9976	118.667	112.417	147.313	AC135983.2
ENSG00000271888	-0.0313144	0.978528	0.94698	0.972918	24.2782	15.1575	19.402	19.3178	28.1041	12.2761	AL136162.1
ENSG00000027001	-0.00658489	0.995446	0.946874	0.972891	626.377	680.068	703.863	655.887	672.686	690.81	MIPEP
ENSG00000223459	-0.0160925	0.988908	0.946768	0.972842	216.561	261.72	128.269	198.698	201.262	214.274	TCAF1P1
ENSG00000131732	0.00824155	1.00573	0.946756	0.972842	496.246	429.463	519.544	444.31	487.743	505.552	ZCCHC9
ENSG00000175595	0.00814314	1.00566	0.946575	0.972762	516.639	471.905	414.988	461.788	475.957	458.68	ERCC4
ENSG00000272721	-0.0403727	0.972404	0.946306	0.972545	11.6535	12.126	6.46735	12.8786	7.25268	11.1601	AC131235.3
ENSG00000109323	-0.0106435	0.99265	0.946239	0.972534	466.141	412.285	319.056	386.357	394.364	427.432	MANBA
ENSG00000118260	-0.00850701	0.994121	0.946044	0.972393	2883.27	2739.47	2115.9	2665.86	2627.28	2492.05	CREB1
ENSG00000084073	-0.0059851	0.99586	0.945936	0.972342	3402.83	3286.15	3840.53	3582.08	3573.76	3414.99	ZMPSTE24
ENSG00000185236	0.00646319	1.00449	0.945798	0.972259	3018.26	3175	3580.76	3383.38	3071.51	3274.37	RAB11B
ENSG00000166578	0.0239658	1.01675	0.945787	0.972259	42.7296	32.3361	25.8694	30.3566	39.8897	29.0162	IQCD
ENSG00000229180	0.0110024	1.00766	0.945487	0.972057	228.215	189.974	206.955	180.3	222.113	218.738	AC006001.3
ENSG00000218739	-0.00805869	0.99443	0.945388	0.972014	2357.9	2191.78	2790.66	2440.49	2667.17	2271.08	CEBPZOS
ENSG00000184616	0.0275333	1.01927	0.945091	0.971768	29.1338	28.2941	56.0504	44.1551	41.7029	24.5522	SPDYE12P
ENSG00000175104	0.00887404	1.00617	0.944818	0.971547	399.133	350.644	331.991	378.078	341.783	356.007	TRAF6
ENSG00000228302	0.0232077	1.01622	0.944768	0.971547	34.9606	34.3571	28.0252	28.5168	29.9173	37.9443	AL512770.1
ENSG00000248578	0.0403057	1.02833	0.94472	0.971547	8.74014	8.08402	18.3242	10.1189	12.6922	11.1601	NPM1P21
ENSG00000013288	0.00804037	1.00559	0.944687	0.971547	2654.09	2938.54	2238.78	2659.42	2449.59	2680.65	MAN2B2
ENSG00000130363	-0.00900694	0.993776	0.944555	0.971513	564.225	582.049	448.403	539.06	521.286	545.729	RSPH3
ENSG00000213261	-0.0357421	0.97553	0.944394	0.971406	15.538	14.147	31.2589	16.5582	30.8239	14.5081	EEF1B2P6
ENSG00000178449	0.00910426	1.00633	0.944284	0.971352	432.151	459.779	552.958	485.706	494.995	453.1	COX14
ENSG00000114739	-0.0130453	0.990998	0.944279	0.971352	526.351	509.293	322.29	483.866	428.815	458.68	ACVR2B
ENSG00000069275	0.00523831	1.00364	0.944174	0.971352	30545.8	29171.2	27050.8	28941.8	29395.1	28116.7	NUCKS1
ENSG00000113575	-0.00634217	0.995614	0.944161	0.971352	6950.35	6996.72	8179.04	7518.32	7501.08	7201.61	PPP2CA
ENSG00000259562	-0.029882	0.9795	0.94416	0.971352	26.2204	23.2416	16.1684	23.9173	27.1975	15.6241	AC090607.2
ENSG00000188542	-0.0129353	0.991074	0.944015	0.971352	142.756	159.659	125.035	138.904	161.372	130.573	DUSP28
ENSG00000122912	-0.00753655	0.99479	0.943979	0.971352	942.964	814.465	890.338	884.021	954.634	821.383	SLC25A16
ENSG00000141994	0.00870881	1.00605	0.943852	0.971321	1076.98	1119.64	1420.66	1184.83	1213.92	1195.25	DUS3L
ENSG00000111364	-0.00853555	0.994101	0.943833	0.971321	714.749	672.995	850.456	727.639	797.795	724.29	DDX55
ENSG00000130779	-0.00685138	0.995262	0.943808	0.971321	3294.06	3139.63	2722.75	3202.16	2998.98	2999.83	CLIP1
ENSG00000266278	-0.0347554	0.976197	0.943665	0.971306	11.6535	13.1365	16.1684	12.8786	14.5054	14.5081	LINC01910
ENSG00000242861	0.0238743	1.01669	0.94366	0.971306	37.8739	39.4096	32.3367	31.2765	47.1424	29.0162	AL591895.1
ENSG00000240776	0.041971	1.02952	0.943598	0.971306	15.538	11.1155	25.8694	8.27908	29.0107	13.3921	AC079944.1
ENSG00000237773	-0.0363912	0.975091	0.943532	0.971306	16.5092	11.1155	11.8568	16.5582	12.6922	11.1601	AC073332.1
ENSG00000167770	-0.00803594	0.994445	0.9434	0.97127	2757.03	2904.18	3569.98	3156.17	3002.61	3122.59	OTUB1
ENSG00000111880	0.00681738	1.00474	0.943263	0.971188	999.289	1059.01	963.635	957.613	1075.21	974.276	RNGTT
ENSG00000244122	-0.0387013	0.973531	0.94324	0.971188	27.1915	23.2416	6.46735	22.0775	20.8515	15.6241	UGT1A7
ENSG00000101654	-0.0090029	0.993779	0.942978	0.971014	1943.22	1916.92	1449.76	1757	1763.31	1824.68	RNMT
ENSG00000230896	0.0174944	1.0122	0.942952	0.971014	87.4014	61.6406	64.6735	73.5918	70.7136	66.9606	AL604028.1
ENSG00000166326	-0.00540172	0.996263	0.942831	0.97098	7283.45	7304.92	6599.93	7284.67	6964.39	7019.7	TRIM44
ENSG00000188002	-0.0198569	0.986331	0.94281	0.97098	52.4408	56.5881	51.7388	67.1525	51.6753	43.5244	AC026412.1
ENSG00000283429	-0.0445801	0.969572	0.94276	0.97098	10.6824	7.07352	16.1684	6.43928	17.2251	11.1601	MIR1244-3
ENSG00000166359	-0.031085	0.978684	0.942684	0.97098	30.1049	16.168	26.9473	22.9974	33.5436	17.8562	WDR88
ENSG00000077063	-0.00977376	0.993248	0.942606	0.97098	407.873	460.789	356.782	438.791	387.112	408.459	CTTNBP2
ENSG00000161800	0.00445254	1.00309	0.942273	0.970701	6337.57	6213.58	6066.37	6248.86	6154.8	6157.02	RACGAP1
ENSG00000114054	-0.00512054	0.996457	0.942142	0.970626	2404.51	2392.87	2316.39	2421.17	2310.88	2408.35	PCCB
ENSG00000272588	-0.0376529	0.974239	0.942011	0.970549	18.4514	11.1155	11.8568	11.0388	18.1317	13.3921	AC139887.4
ENSG00000230499	0.0291347	1.0204	0.94194	0.970536	30.1049	39.4096	26.9473	44.1551	30.8239	18.9722	AC108463.2
ENSG00000198791	0.00627505	1.00436	0.941838	0.97049	2246.22	2006.86	2084.64	2067.01	2215.69	2026.67	CNOT7
ENSG00000123349	-0.00821023	0.994325	0.941691	0.970398	2556.98	2599.01	3260.62	2806.61	2808.6	2848.06	PFDN5
ENSG00000213862	0.0283013	1.01981	0.94169	0.970398	25.2493	25.2626	25.8694	22.0775	19.9449	33.4803	AC044787.1
ENSG00000174652	0.00710007	1.00493	0.941597	0.970398	1086.69	1152.98	998.127	1026.61	1072.49	1124.94	ZNF266
ENSG00000168137	-0.00941685	0.993494	0.941337	0.97021	4914.87	4741.28	3561.35	4504.74	4303.56	4497.52	SETD5
ENSG00000153832	-0.0149242	0.989709	0.941172	0.970099	172.861	168.754	114.256	153.623	144.147	164.053	FBXO36
ENSG00000267368	0.0335613	1.02354	0.941146	0.970099	16.5092	18.189	21.5578	11.9587	20.8515	22.3202	UPK3BL1
ENSG00000205871	0.0311011	1.02179	0.940958	0.969997	19.4225	34.3571	40.9599	20.2377	39.8897	32.3643	RPS3AP47
ENSG00000136436	0.00545282	1.00379	0.940936	0.969997	2588.05	2644.48	2431.72	2582.15	2534.81	2518.83	CALCOCO2
ENSG00000231806	-0.0329072	0.977449	0.940743	0.969894	17.4803	14.147	20.4799	18.3979	19.0383	15.6241	PCAT7
ENSG00000261557	0.0310346	1.02174	0.940697	0.969894	24.2782	20.21	23.7136	30.3566	17.2251	18.9722	EEF1A1P38
ENSG00000124228	0.0100049	1.00696	0.940649	0.969894	2913.38	3040.6	4084.13	3382.46	3254.64	3330.17	DDX27
ENSG00000230626	-0.0316082	0.978329	0.940418	0.969736	15.538	26.2731	28.0252	23.9173	29.0107	17.8562	AC011005.1
ENSG00000261659	-0.0396504	0.972891	0.940324	0.969699	9.71127	17.1785	35.5704	22.0775	16.3185	25.6682	Z92544.2
ENSG00000156521	0.00681565	1.00474	0.940315	0.969699	970.155	952.904	972.258	927.256	925.623	1031.19	TYSND1
ENSG00000170903	0.00770319	1.00535	0.940151	0.969639	712.807	707.352	629.489	658.646	709.856	670.722	MSANTD4
ENSG00000278600	0.0204596	1.01428	0.940142	0.969639	143.727	132.376	70.0629	103.028	119.669	119.413	AC015871.3
ENSG00000273716	-0.029058	0.98006	0.939988	0.969588	23.307	26.2731	25.8694	24.8372	32.6371	18.9722	AC092670.1
ENSG00000158623	-0.00590831	0.995913	0.939975	0.969588	2236.5	2382.76	2139.61	2300.66	2231.11	2255.46	COPG2
ENSG00000143977	0.0103537	1.0072	0.939923	0.969588	2530.76	2592.95	3529.02	2938.15	2931.9	2718.6	SNRPG
ENSG00000040933	-0.0117006	0.991923	0.939574	0.969339	1051.73	1061.03	735.122	1031.2	885.733	955.304	INPP4A
ENSG00000272540	-0.0226654	0.984412	0.939215	0.969027	89.3436	65.6826	60.3619	98.429	65.2741	54.6845	AL662797.1
ENSG00000180071	0.0157615	1.01098	0.939203	0.969027	164.12	132.376	182.164	174.78	173.158	123.877	ANKRD18A
ENSG00000213650	-0.0409912	0.971987	0.939042	0.968967	9.71127	12.126	14.0126	10.1189	15.4119	11.1601	AC092447.2
ENSG00000277363	-0.0226738	0.984407	0.939014	0.968967	41.7584	45.4726	34.4925	38.6357	40.7963	44.6404	SRCIN1
ENSG00000270696	-0.008741	0.99396	0.938791	0.968827	376.797	358.728	395.586	382.677	387.112	367.167	AC005034.3
ENSG00000213985	-0.0298087	0.97955	0.93873	0.968823	33.9894	40.4201	18.3242	36.7959	29.0107	29.0162	AC078899.1
ENSG00000276814	0.0396409	1.02786	0.938316	0.968455	10.6824	13.1365	15.0905	13.7985	12.6922	11.1601	AC004801.6
ENSG00000231443	-0.0402081	0.972515	0.93831	0.968455	11.6535	10.105	17.2463	11.0388	14.5054	14.5081	AC124944.2
ENSG00000260329	0.0243887	1.01705	0.93819	0.968443	38.8451	46.4831	52.8167	42.3153	58.0214	34.5963	AC007541.1
ENSG00000271862	-0.032624	0.977641	0.93801	0.968316	19.4225	24.2521	16.1684	17.478	22.6646	21.2042	AC104118.1
ENSG00000275318	-0.0331212	0.977304	0.937874	0.968235	28.1627	18.189	18.3242	16.5582	25.3844	24.5522	AL136981.2
ENSG00000278635	0.0263322	1.01842	0.937836	0.968235	57.2965	49.5146	28.0252	50.5944	40.7963	41.2923	AC141557.2
ENSG00000250746	0.0313739	1.02198	0.937745	0.96822	36.9028	23.2416	26.9473	25.7571	38.9832	20.0882	AC105250.1
ENSG00000171302	-0.00642465	0.995557	0.937738	0.96822	4604.11	4999.97	5249.33	5146.83	4783.14	4988.56	CANT1
ENSG00000171425	-0.0110896	0.992343	0.937458	0.968042	310.761	308.203	381.574	343.122	309.145	356.007	ZNF581
ENSG00000275029	-0.0394364	0.973035	0.937329	0.967968	15.538	14.147	20.4799	21.1576	20.8515	8.92808	HMGB1P24
ENSG00000265393	-0.0295713	0.979711	0.937314	0.967968	25.2493	34.3571	60.3619	45.075	39.8897	36.8283	AC084125.4
ENSG00000065613	-0.00729101	0.994959	0.936855	0.967596	3816.53	3780.29	3246.61	3766.06	3556.53	3576.81	SLK
ENSG00000262766	-0.0492202	0.966459	0.936831	0.967596	9.71127	15.1575	6.46735	6.43928	11.7856	14.5081	AC135050.5
ENSG00000211460	0.00618755	1.0043	0.936415	0.967261	4733.27	4636.18	5157.71	4896.61	4917.32	4648.18	TSN
ENSG00000109475	0.0106044	1.00738	0.936336	0.967238	6188.02	6208.53	8506.72	6797.12	7115.78	6835.56	RPL34
ENSG00000260285	0.02849	1.01994	0.936143	0.967098	38.8451	44.4621	25.8694	33.1163	29.0107	45.7564	AL133367.1
ENSG00000257790	0.0312143	1.02187	0.936131	0.967098	39.8162	19.1995	34.4925	31.2765	35.3568	24.5522	EIF4A1P4
ENSG00000270084	-0.0352413	0.975869	0.935853	0.966917	24.2782	35.3676	24.7915	14.7184	35.3568	36.8283	GAS5-AS1
ENSG00000131759	0.00770745	1.00536	0.935499	0.966609	1443.09	1490.49	1277.3	1447.92	1344.47	1397.24	RARA
ENSG00000127337	0.00882729	1.00614	0.935365	0.96653	645.799	613.375	694.162	594.254	674.499	672.954	YEATS4
ENSG00000180957	-0.00712889	0.995071	0.93512	0.966395	3564.03	3509.47	3994.67	3850.69	3755.98	3513.2	PITPNB
ENSG00000119812	0.00729633	1.00507	0.935039	0.966371	3636.87	3641.85	4237.19	3874.61	3750.54	3831.26	FAM98A
ENSG00000090857	0.0113377	1.00789	0.935035	0.966371	2132.59	2185.72	1561.86	1940.06	1824.96	2071.31	PDPR
ENSG00000131503	-0.0107316	0.992589	0.934987	0.966371	274.829	261.72	241.448	262.171	254.75	267.842	ANKHD1
ENSG00000188549	0.00936778	1.00651	0.934849	0.966352	1872.33	1964.42	2387.53	2027.45	1974.54	2181.8	CCDC9B
ENSG00000187961	-0.0068571	0.995258	0.934633	0.966188	1464.46	1508.68	1525.22	1489.31	1433.31	1599.24	KLHL17
ENSG00000272240	-0.0462666	0.968439	0.934541	0.966152	13.5958	16.168	8.62313	11.0388	9.06585	20.0882	AC004908.1
ENSG00000076321	-0.00845138	0.994159	0.934168	0.965825	533.148	502.22	488.285	503.184	516.753	513.364	KLHL20
ENSG00000072818	-0.0175222	0.987928	0.934165	0.965825	100.026	94.9872	99.166	106.708	110.603	79.2367	ACAP1
ENSG00000025800	-0.00535706	0.996294	0.934079	0.965825	6307.47	6073.12	6409.14	6304.98	6406.84	6145.86	KPNA6
ENSG00000251259	-0.0410496	0.971948	0.933941	0.965767	16.5092	10.105	15.0905	13.7985	13.5988	15.6241	AC004069.1
ENSG00000275910	-0.0429719	0.970653	0.933894	0.965767	13.5958	16.168	15.0905	19.3178	8.15926	18.9722	AC138932.5
ENSG00000228589	0.0350563	1.0246	0.933582	0.965514	16.5092	22.2311	21.5578	18.3979	17.2251	23.4362	SPCS2P4
ENSG00000166167	-0.0109389	0.992446	0.933519	0.965509	905.09	897.326	700.629	890.461	770.597	862.675	BTRC
ENSG00000212802	-0.020559	0.985851	0.93349	0.965509	95.1704	84.8822	145.515	115.907	97.9112	116.065	RPL15P3
ENSG00000178035	0.00865128	1.00601	0.933254	0.965353	5189.7	5439.53	6482.44	5807.31	5466.71	5734.06	IMPDH2
ENSG00000213839	0.0173908	1.01213	0.932758	0.964898	131.102	112.166	135.814	149.943	119.669	103.789	TMX2P1
ENSG00000272905	-0.0532344	0.963773	0.932291	0.964475	8.74014	9.09452	12.9347	5.51938	9.97243	16.7401	AC018648.1
ENSG00000173653	-0.0117073	0.991918	0.93201	0.964243	865.274	764.95	1075.74	872.983	914.744	939.68	RCE1
ENSG00000116044	0.0058911	1.00409	0.931991	0.964243	4742.01	4673.57	4433.37	4581.09	4716.96	4494.17	NFE2L2
ENSG00000144182	0.0199767	1.01394	0.931912	0.964243	106.824	71.7457	117.49	96.5892	97.0046	98.2088	LIPT1
ENSG00000166479	0.0092839	1.00646	0.93191	0.964243	3085.27	2930.46	2433.88	2899.52	2821.29	2675.07	TMX3
ENSG00000114439	-0.00920989	0.993637	0.931609	0.964064	4737.16	4549.28	3774.78	4603.17	4381.52	4160.48	BBX
ENSG00000236976	-0.0353807	0.975774	0.931378	0.963884	25.2493	19.1995	28.0252	16.5582	29.9173	27.9002	AC091685.2
ENSG00000179698	0.0232088	1.01622	0.931245	0.963806	60.2098	43.4516	54.9725	53.354	53.4885	49.1044	WDR97
ENSG00000265415	-0.00857626	0.994073	0.931236	0.963806	699.211	693.205	789.017	730.398	723.455	739.914	AC099850.3
ENSG00000135972	0.0108355	1.00754	0.931215	0.963806	1203.23	1144.9	1523.06	1321.89	1281.91	1236.54	MRPS9
ENSG00000256742	-0.042724	0.97082	0.931196	0.963806	24.2782	17.1785	9.70102	17.478	14.5054	21.2042	AC145422.1
ENSG00000151304	-0.00865011	0.994022	0.931116	0.963806	664.251	678.047	659.67	714.76	673.593	623.849	SRFBP1
ENSG00000115761	-0.0112581	0.992227	0.930827	0.963668	1689.76	1697.64	2240.94	1938.22	1957.32	1774.45	NOL10
ENSG00000079332	0.00726547	1.00505	0.93073	0.963627	6075.37	6016.53	6930.84	6328.89	6353.35	6242.96	SAR1A
ENSG00000177034	-0.0126184	0.991292	0.930704	0.963627	822.544	766.971	588.529	677.964	727.988	793.483	MTX3
ENSG00000234129	0.0256157	1.01791	0.930685	0.963627	49.5275	41.4306	38.8041	47.8347	42.6095	36.8283	AC073529.1
ENSG00000141867	0.00597364	1.00415	0.930557	0.963624	6336.6	6373.24	6749.76	6547.83	6248.18	6583.34	BRD4
ENSG00000227268	0.0208378	1.01455	0.930544	0.963624	88.3725	80.8402	63.5956	68.9923	73.4334	88.1647	KLLN
ENSG00000235408	0.0469871	1.03311	0.930345	0.963523	19.4225	13.1365	11.8568	21.1576	12.6922	8.92808	SNORA71B
ENSG00000125871	-0.00729568	0.994956	0.930298	0.963523	904.119	923.599	907.585	895.98	928.343	925.172	MGME1
ENSG00000229659	0.0642133	1.04551	0.930034	0.963319	6.79789	12.126	12.9347	20.2377	5.43951	4.46404	RPL26P6
ENSG00000278709	0.0135213	1.00942	0.929828	0.963164	178.687	201.09	188.631	203.297	185.85	172.981	NKILA
ENSG00000237886	-0.0276443	0.981021	0.929715	0.963106	55.3542	47.4936	33.4146	37.7158	52.5819	49.1044	NALT1
ENSG00000169635	-0.0128874	0.991107	0.929529	0.962973	382.624	380.959	320.134	377.158	315.492	402.879	HIC2
ENSG00000161860	-0.0346	0.976302	0.929379	0.962876	25.2493	20.21	22.6357	27.5969	20.8515	21.2042	SYCE2
ENSG00000207741	0.0431596	1.03037	0.929345	0.962876	20.3937	19.1995	10.7789	16.5582	19.9449	12.2761	MIR590
ENSG00000102908	-0.0199708	0.986253	0.929293	0.962876	1450.86	1254.03	684.461	1139.75	1203.94	1093.69	NFAT5
ENSG00000165813	-0.0101101	0.993017	0.929271	0.962876	1695.59	1722.91	1364.61	1596.94	1679	1541.21	CCDC186
ENSG00000267395	0.0264906	1.01853	0.929153	0.962876	50.4986	50.5251	63.5956	37.7158	61.6478	62.4965	DM1-AS
ENSG00000075188	-0.00994188	0.993133	0.929	0.962778	1152.73	1069.11	1355.99	1196.79	1231.14	1172.93	NUP37
ENSG00000163933	0.00978451	1.00681	0.928985	0.962778	989.578	926.631	1158.73	1006.37	1013.56	1033.42	RFT1
ENSG00000259523	-0.0294387	0.979801	0.928902	0.962778	33.9894	39.4096	29.1031	41.3954	30.8239	32.3643	AC022613.2
ENSG00000125901	-0.0125123	0.991365	0.928721	0.962667	874.014	1038.8	1266.52	1081.8	1042.57	1081.41	MRPS26
ENSG00000180015	0.0395393	1.02779	0.928458	0.962453	25.2493	42.4411	17.2463	23.9173	36.2634	22.3202	AC093909.1
ENSG00000180104	-0.00647185	0.995524	0.928327	0.962376	2620.1	2583.85	2678.56	2705.42	2530.28	2682.89	EXOC3
ENSG00000276851	0.0448037	1.03154	0.928028	0.962125	14.5669	19.1995	37.7262	32.1964	20.8515	15.6241	AC002401.4
ENSG00000279800	-0.0444349	0.96967	0.927958	0.962112	17.4803	26.2731	12.9347	15.6383	28.1041	14.5081	BCLAF1P2
ENSG00000135074	0.00984495	1.00685	0.927775	0.961981	3646.58	3773.22	2959.89	3521.37	3390.63	3398.25	ADAM19
ENSG00000269190	0.00730348	1.00508	0.927602	0.961861	3408.65	3396.3	3240.14	3314.39	3136.78	3546.68	FBXO17
ENSG00000099917	0.00807786	1.00561	0.927561	0.961861	3771.86	3912.66	4276	4024.55	3701.59	4168.3	MED15
ENSG00000179715	0.0172505	1.01203	0.927188	0.96155	239.868	227.363	167.073	209.737	182.224	236.594	PCED1B
ENSG00000241061	0.0359685	1.02524	0.927181	0.96155	22.3359	25.2626	19.402	20.2377	20.8515	24.5522	RPL5P1
ENSG00000107443	0.00965704	1.00672	0.927003	0.961476	609.867	567.902	600.386	596.093	623.73	544.613	CCNJ
ENSG00000128585	-0.0178406	0.98771	0.926984	0.961476	3482.46	3252.81	1888.47	2964.83	2816.76	2950.73	MKLN1
ENSG00000273066	0.0172811	1.01205	0.926746	0.961327	1794.64	1741.1	1054.18	1461.72	1407.02	1668.43	AL355987.4
ENSG00000231731	0.0326034	1.02286	0.926739	0.961327	28.1627	28.2941	24.7915	28.5168	26.291	24.5522	AC010976.1
ENSG00000172345	-0.0320843	0.978006	0.926601	0.961295	44.6718	46.4831	35.5704	34.0362	61.6478	33.4803	STARD5
ENSG00000214192	0.045842	1.03229	0.926442	0.961189	11.6535	14.147	24.7915	12.8786	18.1317	17.8562	UBE2V1P2
ENSG00000262814	-0.0173372	0.988055	0.92632	0.961121	874.985	939.767	1484.26	1101.12	1070.68	1166.23	MRPL12
ENSG00000132622	-0.0267815	0.981608	0.92621	0.961066	37.8739	43.4516	43.1157	44.1551	38.0766	44.6404	HSPA12B
ENSG00000105988	0.0634626	1.04497	0.925906	0.96081	5.82676	13.1365	25.8694	10.1189	24.4778	7.81207	NHP2P1
ENSG00000105085	0.0147116	1.01025	0.925856	0.96081	155.38	183.911	169.229	161.902	168.625	172.981	MED26
ENSG00000273301	-0.0402396	0.972493	0.92577	0.960786	24.2782	23.2416	12.9347	21.1576	19.0383	22.3202	AC016717.2
ENSG00000186300	0.014744	1.01027	0.925461	0.960524	226.272	232.416	198.332	204.217	200.355	247.754	ZNF555
ENSG00000185038	-0.0547346	0.962772	0.925327	0.960445	6.79789	16.168	18.3242	9.19897	12.6922	21.2042	MROH2A
ENSG00000272455	0.0231497	1.01618	0.925224	0.960396	79.6324	83.8717	120.724	87.3902	109.697	81.4687	AL391244.3
ENSG00000162885	-0.0109927	0.992409	0.925089	0.960315	1032.31	1073.15	845.067	1029.37	995.43	948.608	B3GALNT2
ENSG00000277462	0.0158137	1.01102	0.924789	0.960063	193.254	156.628	178.93	185.819	155.933	181.91	ZNF670
ENSG00000250568	0.0427771	1.03009	0.924718	0.960048	18.4514	16.168	18.3242	22.0775	13.5988	15.6241	AC098591.2
ENSG00000168477	0.0620335	1.04394	0.92457	0.959954	19.4225	8.08402	5.38946	11.0388	12.6922	7.81207	TNXB
ENSG00000144744	0.00645997	1.00449	0.9243	0.959732	2397.71	2425.21	2436.03	2457.05	2408.8	2359.24	UBA3
ENSG00000279968	-0.0464411	0.968322	0.924242	0.959731	13.5958	13.1365	15.0905	12.8786	12.6922	17.8562	GVQW2
ENSG00000272097	0.0468363	1.033	0.92371	0.959237	15.538	16.168	12.9347	11.9587	12.6922	18.9722	AL024498.1
ENSG00000187741	-0.00827946	0.994278	0.923663	0.959237	2308.37	2424.2	2142.85	2241.79	2246.52	2429.55	FANCA
ENSG00000136011	-0.0613566	0.958363	0.923617	0.959237	16.5092	8.08402	5.38946	10.1189	8.15926	13.3921	STAB2
ENSG00000198324	0.0112555	1.00783	0.923552	0.959237	430.209	463.821	486.129	437.871	436.067	496.624	FAM109A
ENSG00000146243	0.0184352	1.01286	0.923526	0.959237	149.553	163.701	127.191	134.305	169.531	130.573	IRAK1BP1
ENSG00000147955	0.00893351	1.00621	0.923364	0.959172	2475.4	2824.35	2908.15	2769.81	2593.74	2793.37	SIGMAR1
ENSG00000238249	-0.0493649	0.966362	0.923256	0.959119	15.538	17.1785	23.7136	31.2765	15.4119	11.1601	HMGN2P17
ENSG00000101306	-0.0336426	0.976951	0.92324	0.959119	29.1338	30.3151	44.1935	37.7158	27.1975	41.2923	MYLK2
ENSG00000025293	0.00801965	1.00557	0.923163	0.959119	2728.87	2719.26	2491.01	2746.81	2656.29	2490.93	PHF20
ENSG00000025156	0.0126237	1.00879	0.923108	0.959119	633.175	525.461	479.662	526.181	551.204	547.961	HSF2
ENSG00000238000	-0.04394	0.970002	0.923043	0.959119	15.538	18.189	19.402	19.3178	22.6646	12.2761	AC116347.1
ENSG00000282508	-0.0291193	0.980018	0.923029	0.959119	57.2965	57.5986	36.6483	45.075	48.049	62.4965	LINC01002
ENSG00000253111	0.0600573	1.04251	0.922781	0.958979	4.85563	16.168	14.0126	10.1189	9.06585	14.5081	AC091114.1
ENSG00000238018	0.0317369	1.02224	0.922747	0.958979	69.9211	78.8192	36.6483	53.354	55.3017	73.6566	AC093110.1
ENSG00000125726	-0.0105105	0.992741	0.922649	0.95896	16304.2	16174.1	20460.5	17996.9	17482.6	17845	CD70
ENSG00000256060	0.0225917	1.01578	0.922533	0.958899	86.4303	88.9242	131.503	96.5892	109.697	94.8608	TRAPPC2B
ENSG00000132424	-0.00783189	0.994586	0.922457	0.958878	3394.09	3008.27	3076.3	3114.77	3229.26	3187.32	PNISR
ENSG00000164414	-0.0152409	0.989491	0.922427	0.958878	179.658	181.89	223.124	195.938	196.729	197.534	SLC35A1
ENSG00000258643	0.0323924	1.02271	0.922305	0.958839	34.9606	41.4306	35.5704	40.4755	42.6095	25.6682	BCL2L2-PABPN1
ENSG00000279573	-0.0651493	0.955846	0.922187	0.958775	11.6535	3.03151	15.0905	10.1189	10.879	10.0441	AC134407.2
ENSG00000105676	0.0165835	1.01156	0.922107	0.95875	1312.96	1411.67	2074.94	1699.05	1568.39	1475.36	ARMC6
ENSG00000141519	0.0162338	1.01132	0.921696	0.958383	163.149	146.523	146.593	140.744	149.587	161.821	CCDC40
ENSG00000238228	-0.0473408	0.967718	0.921639	0.958382	15.538	15.1575	12.9347	12.8786	13.5988	18.9722	OR7E7P
ENSG00000281896	0.0328268	1.02301	0.921413	0.958206	116.535	116.208	47.4272	107.628	86.1256	80.3527	AC018638.8
ENSG00000205060	-0.00835296	0.994227	0.921387	0.958206	1760.65	1826.99	1629.77	1809.44	1746.08	1691.87	SLC35B4
ENSG00000245275	0.0466122	1.03284	0.92102	0.957915	41.7584	22.2311	15.0905	18.3979	31.7305	26.7842	SAP30L-AS1
ENSG00000165379	-0.029576	0.979708	0.920876	0.957825	58.2676	53.5566	34.4925	53.354	46.2358	50.2204	LRFN5
ENSG00000139190	0.0179389	1.01251	0.920786	0.957789	297.165	245.552	192.943	230.894	256.564	239.942	VAMP1
ENSG00000226054	-0.0424608	0.970997	0.920595	0.95765	22.3359	19.1995	19.402	22.9974	14.5054	25.6682	MEMO1P1
ENSG00000257058	0.0558367	1.03946	0.920495	0.957605	8.74014	12.126	16.1684	12.8786	14.5054	7.81207	AP001363.2
ENSG00000148362	-0.0124585	0.991402	0.920384	0.957548	1392.6	1387.42	1817.32	1534.39	1514.9	1586.97	PAXX
ENSG00000188493	-0.0116571	0.991952	0.920297	0.957517	453.516	438.558	399.898	419.473	419.749	465.376	C19orf54
ENSG00000216937	0.0212681	1.01485	0.920279	0.957517	128.189	98.0187	89.465	99.3489	104.257	108.253	CCDC7
ENSG00000236438	0.0333252	1.02337	0.920116	0.957446	67.0077	72.7562	52.8167	43.2352	52.5819	93.7448	FAM157A
ENSG00000185418	-0.0124975	0.991375	0.919842	0.95722	416.613	367.823	457.026	407.515	422.469	421.852	TARSL2
ENSG00000204390	0.0375412	1.02636	0.919825	0.95722	38.8451	35.3676	25.8694	40.4755	21.758	35.7123	HSPA1L
ENSG00000170949	-0.0130673	0.990983	0.919721	0.957212	598.214	547.692	469.961	501.344	580.214	550.193	ZNF160
ENSG00000163513	-0.011826	0.991836	0.919702	0.957212	2803.64	2850.63	2178.42	2651.14	2603.71	2643.83	TGFBR2
ENSG00000102547	0.0113687	1.00791	0.919269	0.956859	378.739	371.865	363.249	360.6	381.672	362.703	CAB39L
ENSG00000220205	-0.0101982	0.992956	0.918973	0.95661	708.922	650.763	625.177	682.564	668.153	648.401	VAMP2
ENSG00000171222	0.014446	1.01006	0.918927	0.95661	1513.99	1607.71	2143.93	1672.37	1674.46	1865.97	SCAND1
ENSG00000173599	-0.0098151	0.99322	0.918875	0.95661	879.841	905.41	795.484	882.182	881.201	834.775	PC
ENSG00000134900	-0.0115538	0.992024	0.918705	0.956508	2596.79	2669.75	2065.24	2469	2472.26	2450.76	TPP2
ENSG00000225032	-0.036017	0.975344	0.918658	0.956508	55.3542	32.3361	38.8041	36.7959	58.0214	34.5963	AL162586.1
ENSG00000179115	0.0141385	1.00985	0.918584	0.9565	2678.37	2732.4	3765.07	3115.69	2978.13	2990.91	FARSA
ENSG00000255993	-0.0674953	0.954293	0.918573	0.9565	7.76901	13.1365	10.7789	10.1189	4.53292	18.9722	PSMC1P9
ENSG00000110841	-0.0136127	0.990609	0.918507	0.9565	2753.14	2699.05	1973.62	2497.52	2495.83	2504.33	PPFIBP1
ENSG00000279355	-0.0293561	0.979858	0.918429	0.9565	57.2965	38.3991	54.9725	56.1137	52.5819	44.6404	AGPAT4-IT1
ENSG00000262519	-0.0495091	0.966265	0.918116	0.956248	10.6824	15.1575	20.4799	15.6383	15.4119	16.7401	TXNP4
ENSG00000033100	0.0122026	1.00849	0.918086	0.956248	6027.78	6549.07	8093.89	6835.76	6618.98	7040.9	CHPF2
ENSG00000132357	-0.0149549	0.989688	0.918086	0.956248	208.792	242.521	206.955	212.496	221.207	232.13	CARD6
ENSG00000149781	-0.0519182	0.964653	0.918031	0.956248	23.307	11.1155	42.0378	22.0775	22.6646	34.5963	FERMT3
ENSG00000257285	-0.0597577	0.959425	0.91802	0.956248	15.538	7.07352	15.0905	11.0388	19.0383	8.92808	AL132780.1
ENSG00000132792	0.0145916	1.01017	0.917877	0.956248	1538.26	1621.86	2199.98	1710.09	1791.41	1803.47	CTNNBL1
ENSG00000267426	-0.0582716	0.960414	0.917777	0.956248	8.74014	14.147	15.0905	7.35918	14.5054	17.8562	AC087289.3
ENSG00000229349	-0.0589792	0.959943	0.917747	0.956248	12.6246	13.1365	10.7789	11.9587	19.0383	6.69606	ACTG1P9
ENSG00000147121	-0.0133029	0.990822	0.917725	0.956248	365.144	324.371	377.262	378.078	369.887	326.991	KRBOX4
ENSG00000204713	0.00737511	1.00513	0.91732	0.95595	2206.4	2171.57	2248.48	2163.6	2164.92	2265.5	TRIM27
ENSG00000183474	0.0166475	1.01161	0.917251	0.955937	146.64	147.533	150.905	148.103	141.427	150.661	GTF2H2C
ENSG00000132950	0.0145837	1.01016	0.917241	0.955937	348.634	375.907	328.757	319.204	397.991	324.759	ZMYM5
ENSG00000120451	-0.0100173	0.993081	0.916837	0.955622	2757.03	2908.23	2484.54	2933.55	2618.22	2654.99	SNX19
ENSG00000235652	0.0443641	1.03123	0.916827	0.955622	52.4408	39.4096	17.2463	31.2765	31.7305	43.5244	AL356599.1
ENSG00000117569	-0.0124429	0.991412	0.916785	0.955622	632.203	514.346	577.75	545.499	608.318	585.905	PTBP2
ENSG00000198056	-0.0104828	0.99276	0.916779	0.955622	718.634	633.585	677.994	684.404	702.603	657.33	PRIM1
ENSG00000053254	0.0130621	1.0091	0.916402	0.955405	1253.72	1189.36	938.843	1101.12	1106.03	1146.14	FOXN3
ENSG00000214016	-0.0543223	0.963047	0.916377	0.955405	12.6246	10.105	14.0126	11.9587	11.7856	14.5081	RPSAP61
ENSG00000138744	-0.0104821	0.992761	0.91636	0.955405	676.875	709.373	671.526	722.119	641.862	709.782	NAAA
ENSG00000243147	0.0134039	1.00933	0.916248	0.955405	2095.69	1947.24	2658.08	2144.28	2313.6	2179.57	MRPL33
ENSG00000101353	-0.0297004	0.979624	0.916233	0.955405	54.3831	49.5146	39.882	47.8347	55.3017	43.5244	MROH8
ENSG00000261326	0.0242622	1.01696	0.915999	0.95528	193.254	130.355	116.412	130.625	164.092	138.385	LINC01355
ENSG00000142694	-0.0158294	0.989088	0.915986	0.95528	636.088	721.499	902.195	744.197	698.07	842.587	EVA1B
ENSG00000172086	-0.00833353	0.99424	0.915723	0.95511	2056.85	1964.42	1954.22	1971.34	2106.9	1930.7	KRCC1
ENSG00000162775	-0.0150563	0.989618	0.9155	0.954935	1011.91	963.009	717.876	895.06	869.415	958.652	RBM15
ENSG00000137124	-0.0117653	0.991878	0.915453	0.954935	1735.4	1717.85	2155.78	1865.55	1912.89	1874.9	ALDH1B1
ENSG00000021826	0.0169168	1.01179	0.915366	0.954914	2068.5	2228.16	1414.19	1872.91	1931.93	1840.3	CPS1
ENSG00000175215	0.0142168	1.0099	0.915342	0.954914	3983.56	4256.24	2993.3	3809.29	3561.97	3753.14	CTDSP2
ENSG00000273888	-0.0397788	0.972804	0.915309	0.954914	25.2493	21.2205	29.1031	22.9974	29.9173	24.5522	FRMD6-AS1
ENSG00000234925	0.0452201	1.03184	0.915274	0.954914	19.4225	23.2416	17.2463	16.5582	23.5712	17.8562	ATP5PDP4
ENSG00000138398	-0.0139741	0.990361	0.915127	0.954901	3586.37	3354.87	4619.84	3795.5	4163.04	3712.96	PPIG
ENSG00000232472	0.0286928	1.02009	0.915117	0.954901	60.2098	51.5356	79.764	55.1938	70.7136	61.3805	EEF1B2P3
ENSG00000111540	0.00968037	1.00673	0.914898	0.95478	3292.12	3247.75	2818.69	3143.29	2989.92	3165	RAB5B
ENSG00000262049	0.0199243	1.01391	0.914768	0.954702	139.842	125.302	169.229	130.625	152.306	145.081	AC139530.1
ENSG00000164885	-0.0136578	0.990578	0.914602	0.954589	826.429	856.906	1095.14	925.417	942.848	935.216	CDK5
ENSG00000188460	0.047835	1.03371	0.914566	0.954589	17.4803	15.1575	19.402	16.5582	19.0383	14.5081	ACTBP11
ENSG00000089009	0.0137626	1.00959	0.914243	0.954332	17252.1	17621.1	23620.9	19463.2	19293	19180.9	RPL6
ENSG00000267105	0.0600798	1.04252	0.913984	0.954121	10.6824	9.09452	16.1684	9.19897	10.879	14.5081	AC011511.3
ENSG00000272606	0.0531079	1.0375	0.913829	0.954018	16.5092	11.1155	20.4799	14.7184	19.0383	12.2761	AC015982.1
ENSG00000046889	0.0209407	1.01462	0.913787	0.954018	3063.9	2833.45	1671.81	2586.75	2392.48	2482	PREX2
ENSG00000150433	-0.012931	0.991077	0.913783	0.954018	451.574	446.642	526.011	507.783	461.452	466.492	TMEM218
ENSG00000213790	0.0414367	1.02914	0.913724	0.954018	23.307	29.3046	23.7136	25.7571	29.0107	18.9722	OLA1P1
ENSG00000278058	-0.0283019	0.980574	0.91371	0.954018	55.3542	46.4831	54.9725	53.354	57.1148	49.1044	AC009159.3
ENSG00000018610	-0.0148939	0.989729	0.913567	0.954018	754.565	692.194	951.778	761.675	844.937	815.803	CXorf56
ENSG00000145868	0.011549	1.00804	0.913514	0.954018	1470.29	1477.35	1204	1363.29	1370.76	1386.08	FBXO38
ENSG00000186280	0.0237193	1.01658	0.913453	0.954018	92.257	90.9452	78.6861	90.1499	94.2848	72.5406	KDM4D
ENSG00000228057	0.0583701	1.04129	0.913356	0.953995	24.2782	11.1155	11.8568	11.0388	19.9449	14.5081	SEC63P1
ENSG00000187187	0.0288669	1.02021	0.913195	0.953885	102.939	64.6721	62.5177	74.5117	72.5268	79.2367	ZNF546
ENSG00000253327	-0.0686801	0.95351	0.913022	0.953764	13.5958	8.08402	16.1684	18.3979	16.3185	4.46404	RAD21-AS1
ENSG00000225151	-0.0231334	0.984093	0.913005	0.953764	75.7479	85.8927	85.1534	79.1112	81.5926	90.3968	GOLGA2P7
ENSG00000128708	0.00934549	1.0065	0.912996	0.953764	3728.15	3729.76	4203.78	3901.28	3998.04	3683.95	HAT1
ENSG00000159267	-0.0152752	0.989468	0.912923	0.953764	1438.24	1377.31	1017.53	1322.81	1224.8	1328.05	HLCS
ENSG00000210174	0.040043	1.02814	0.912901	0.953764	62.1521	51.5356	103.478	81.8709	87.9387	40.1763	MT-TR
ENSG00000235238	-0.0343426	0.976477	0.912792	0.953764	40.7873	37.3886	52.8167	42.3153	55.3017	35.7123	SUMO2P1
ENSG00000101856	0.00704365	1.00489	0.912651	0.95373	7160.12	7036.13	7452.54	7220.27	7284.41	7036.44	PGRMC1
ENSG00000239653	-0.0456124	0.968878	0.912517	0.953648	36.9028	16.168	28.0252	28.5168	32.6371	22.3202	PSMD6-AS2
ENSG00000268568	-0.0672652	0.954446	0.912378	0.953563	7.76901	9.09452	16.1684	13.7985	6.34609	14.5081	AC007228.2
ENSG00000172809	0.0153595	1.0107	0.912123	0.953355	8083.66	8535.71	11684.3	9455.62	9228.13	9318.68	RPL38
ENSG00000261716	-0.0226403	0.984429	0.91199	0.953275	226.272	190.985	143.36	173.861	218.487	177.445	AC239868.1
ENSG00000137962	0.0172886	1.01206	0.911871	0.95321	8820.74	8550.87	5674.02	7650.79	7664.27	7457.17	ARHGAP29
ENSG00000171169	-0.0132797	0.990837	0.911748	0.95314	507.899	558.808	632.722	543.659	578.401	592.601	NAIF1
ENSG00000185009	0.0109024	1.00759	0.911584	0.953027	3704.85	3705.51	3118.34	3664.87	3361.62	3423.92	AP3M1
ENSG00000002586	-0.00845561	0.994156	0.911564	0.953027	9037.3	9149.09	10128.9	9678.24	9460.21	9341	CD99
ENSG00000256694	0.0248515	1.01737	0.911499	0.953027	67.9789	73.7667	76.5303	71.752	67.0873	75.8886	AC026369.2
ENSG00000145331	0.0132519	1.00923	0.911452	0.953027	324.356	314.266	327.679	322.884	329.997	303.555	TRMT10A
ENSG00000169976	-0.0179906	0.987607	0.911411	0.953027	1645.09	1756.25	2565.38	1980.54	2055.23	2004.35	SF3B5
ENSG00000125779	0.00983625	1.00684	0.911013	0.952725	1304.22	1281.32	1451.92	1343.97	1323.61	1341.44	PANK2
ENSG00000249471	-0.0246056	0.983089	0.911007	0.952725	92.257	112.166	133.659	126.026	121.482	94.8608	ZNF324B
ENSG00000197971	0.0148161	1.01032	0.910828	0.952649	1500.39	1526.87	1130.71	1431.36	1287.35	1398.36	MBP
ENSG00000184277	-0.0105517	0.992713	0.910729	0.952605	716.691	737.667	757.758	782.833	724.361	719.826	TM2D3
ENSG00000151151	-0.0194258	0.986625	0.910231	0.952143	1072.12	1088.31	684.461	918.977	1003.59	962	IPMK
ENSG00000224905	-0.0372518	0.97451	0.910065	0.952028	30.1049	43.4516	31.2589	33.1163	33.5436	41.2923	AP001347.1
ENSG00000267571	-0.0751655	0.949233	0.909337	0.951325	15.538	13.1365	3.23367	9.19897	14.5054	10.0441	AC104532.2
ENSG00000175376	0.0148667	1.01036	0.909008	0.95104	753.594	785.16	1004.59	857.344	820.459	838.123	EIF1AD
ENSG00000250539	0.0468417	1.033	0.908991	0.95104	23.307	32.3361	28.0252	19.3178	38.9832	22.3202	KRT8P33
ENSG00000255200	-0.0310955	0.978677	0.90895	0.95104	58.2676	46.4831	74.3745	57.0336	58.0214	68.0766	PGAM1P8
ENSG00000134375	0.0185378	1.01293	0.908744	0.95094	2425.87	2433.29	3700.4	2824.08	2825.83	2798.95	TIMM17A
ENSG00000265366	0.0621613	1.04403	0.908595	0.950844	22.3359	11.1155	11.8568	10.1189	19.9449	13.3921	GLUD1P2
ENSG00000198754	-0.0376505	0.97424	0.908467	0.950768	32.0472	42.4411	32.3367	30.3566	36.2634	43.5244	OXCT2
ENSG00000171720	-0.00957157	0.993387	0.90845	0.950768	2174.35	2281.71	2492.08	2340.22	2329.02	2323.53	HDAC3
ENSG00000091164	-0.0158534	0.989071	0.908312	0.950724	2334.59	2216.03	3116.18	2607.91	2700.72	2440.71	TXNL1
ENSG00000254363	-0.037208	0.974539	0.908281	0.950724	36.9028	31.3256	36.6483	37.7158	29.0107	41.2923	AC011379.2
ENSG00000212664	0.032065	1.02247	0.908202	0.950724	70.8922	65.6826	71.1408	85.5505	70.7136	45.7564	AC064799.1
ENSG00000100580	-0.015892	0.989045	0.907842	0.950408	1018.71	1031.72	749.135	967.732	941.942	921.824	TMED8
ENSG00000238197	-0.041257	0.971808	0.907814	0.950408	63.1232	41.4306	26.9473	40.4755	45.3292	50.2204	PAXBP1-AS1
ENSG00000172869	0.020589	1.01437	0.907556	0.950227	2080.15	1991.7	1236.34	1725.73	1769.65	1738.74	DMXL1
ENSG00000105552	-0.012374	0.99146	0.90753	0.950227	981.809	1104.48	1182.45	1090.08	1039.85	1167.35	BCAT2
ENSG00000269858	-0.0145918	0.989937	0.907426	0.950208	388.451	413.295	486.129	436.951	428.815	434.128	EGLN2
ENSG00000107566	-0.00945815	0.993466	0.90729	0.950125	4327.34	4560.4	3967.72	4313.4	4390.59	4236.37	ERLIN1
ENSG00000166596	0.0636695	1.04512	0.90727	0.950125	20.3937	7.07352	26.9473	18.3979	19.9449	13.3921	CFAP52
ENSG00000060642	-0.0121504	0.991613	0.906743	0.94967	569.08	593.165	520.622	556.538	571.148	570.281	PIGV
ENSG00000100523	-0.0152288	0.9895	0.906716	0.94967	704.067	665.921	531.4	663.246	620.104	639.473	DDHD1
ENSG00000080503	0.0127032	1.00884	0.906564	0.9496	4843.01	4882.75	3875.02	4579.25	4355.23	4548.85	SMARCA2
ENSG00000258317	-0.060098	0.959199	0.90654	0.9496	16.5092	13.1365	14.0126	10.1189	13.5988	22.3202	AC034102.6
ENSG00000236144	-0.0149774	0.989672	0.90636	0.949504	247.637	258.689	256.538	256.651	258.377	255.566	TMEM147-AS1
ENSG00000204622	-0.0600867	0.959206	0.905994	0.949179	12.6246	21.2205	11.8568	11.0388	19.9449	16.7401	HLA-J
ENSG00000129472	0.0129995	1.00905	0.905872	0.94911	528.293	524.451	462.415	483.866	506.781	512.248	RAB2B
ENSG00000270761	-0.0671319	0.954534	0.905815	0.949109	7.76901	11.1155	11.8568	9.19897	11.7856	11.1601	AL355353.1
ENSG00000065150	0.00713614	1.00496	0.905788	0.949109	8899.4	9007.62	9047.82	9176.9	8808.38	8835.45	IPO5
ENSG00000145337	-0.0363754	0.975102	0.905727	0.949109	39.8162	60.6301	71.1408	71.752	48.9556	54.6845	PYURF
ENSG00000139746	0.0122551	1.00853	0.90549	0.948946	2634.67	2411.06	2107.28	2286.86	2432.37	2374.87	RBM26
ENSG00000131375	0.0139444	1.00971	0.905485	0.948946	1379.97	1338.92	1068.19	1279.58	1230.24	1242.12	CAPN7
ENSG00000131788	0.00980109	1.00682	0.905434	0.948946	1483.88	1445.02	1365.69	1437.8	1368.94	1460.86	PIAS3
ENSG00000162337	-0.0111764	0.992283	0.905197	0.948874	3126.06	3453.9	2862.88	3266.56	3087.83	3162.77	LRP5
ENSG00000141428	-0.0185165	0.987247	0.905194	0.948874	283.569	255.657	356.782	309.085	297.36	300.207	C18orf21
ENSG00000151640	0.0135889	1.00946	0.905168	0.948874	1310.05	1304.56	1600.67	1321.89	1365.32	1488.76	DPYSL4
ENSG00000110697	0.00898654	1.00625	0.905164	0.948874	3017.29	3183.08	3220.74	3018.18	3076.04	3269.91	PITPNM1
ENSG00000155252	0.0121746	1.00847	0.904998	0.948874	1177.01	1152.98	1321.49	1304.41	1154.99	1159.53	PI4K2A
ENSG00000085491	0.0107091	1.00745	0.904927	0.948874	4448.73	4270.38	3811.42	4115.62	4342.54	3979.69	SLC25A24
ENSG00000161526	0.0140691	1.0098	0.904836	0.948848	2362.75	2454.51	3101.09	2623.55	2598.27	2618.16	SAP30BP
ENSG00000204839	-0.0212444	0.985382	0.904811	0.948848	400.104	407.232	613.32	456.269	481.397	503.32	MROH6
ENSG00000198134	0.0501745	1.03539	0.904578	0.948695	19.4225	20.21	21.5578	16.5582	24.4778	17.8562	AC007537.1
ENSG00000105792	-0.0277794	0.980929	0.904481	0.948652	116.535	116.208	73.2966	103.948	100.631	108.253	CFAP69
ENSG00000168026	-0.0359841	0.975366	0.904409	0.948636	107.795	97.0082	49.583	79.1112	83.4058	99.3248	TTC21A
ENSG00000224316	-0.080022	0.946043	0.904377	0.948636	13.5958	12.126	4.31157	8.27908	7.25268	16.7401	GTF2IP5
ENSG00000104969	-0.0167649	0.988447	0.904367	0.948636	4141.85	4591.72	6072.84	5104.51	4918.22	4955.08	SGTA
ENSG00000146757	0.0154582	1.01077	0.903579	0.947942	676.875	628.532	533.556	587.814	659.087	572.513	ZNF92
ENSG00000096080	-0.0156767	0.989193	0.903522	0.947941	424.382	477.968	540.024	518.822	461.452	476.536	MRPS18A
ENSG00000229647	0.0433944	1.03054	0.903521	0.947941	31.0761	26.2731	38.8041	23.9173	31.7305	37.9443	MYOSLID
ENSG00000259495	-0.062655	0.9575	0.903501	0.947941	16.5092	14.147	9.70102	15.6383	16.3185	10.0441	AC016705.2
ENSG00000110876	0.073536	1.05229	0.903407	0.947941	18.4514	15.1575	11.8568	15.6383	22.6646	4.46404	SELPLG
ENSG00000112118	-0.0106678	0.992633	0.903378	0.947941	5994.76	6278.25	7025.7	6685.81	6227.33	6527.54	MCM3
ENSG00000135631	-0.00881098	0.993911	0.903377	0.947941	4633.24	4723.09	4384.86	4665.72	4426.85	4735.23	RAB11FIP5
ENSG00000184675	-0.0182358	0.987439	0.903217	0.947941	443.805	438.558	321.212	401.995	405.243	412.923	AMER1
ENSG00000158555	-0.0195808	0.986519	0.903214	0.947941	167.034	215.237	206.955	207.897	191.289	197.534	GDPD5
ENSG00000129473	-0.0144706	0.99002	0.902968	0.947831	644.828	709.373	587.451	602.533	655.461	705.318	BCL2L2
ENSG00000176054	0.0627481	1.04445	0.902964	0.947831	14.5669	16.168	19.402	24.8372	12.6922	10.0441	RPL23P2
ENSG00000119203	0.0110615	1.0077	0.902948	0.947831	2731.78	2684.9	2977.14	2700.82	2998.98	2627.09	CPSF3
ENSG00000175886	0.0365903	1.02569	0.902927	0.947831	39.8162	41.4306	51.7388	38.6357	38.9832	52.4524	RPL7AP66
ENSG00000176909	-0.0552953	0.962397	0.902857	0.947831	17.4803	21.2205	17.2463	20.2377	12.6922	25.6682	MAMSTR
ENSG00000260128	-0.0714057	0.95171	0.90282	0.947831	9.71127	12.126	7.54524	9.19897	12.6922	8.92808	ULK4P2
ENSG00000185065	-0.0557084	0.962122	0.902682	0.947831	22.3359	18.189	11.8568	18.3979	16.3185	20.0882	AC000068.1
ENSG00000214776	0.043475	1.03059	0.902522	0.947774	53.412	27.2836	35.5704	31.2765	41.7029	40.1763	AC092821.1
ENSG00000143374	-0.00924502	0.993612	0.90232	0.947621	1474.17	1453.1	1497.19	1449.76	1518.53	1484.29	TARS2
ENSG00000232259	-0.0540924	0.9632	0.90219	0.947544	17.4803	22.2311	17.2463	14.7184	25.3844	18.9722	AL158166.2
ENSG00000089723	-0.0216006	0.985139	0.901986	0.947388	147.611	204.121	171.385	186.739	174.064	169.633	OTUB2
ENSG00000249602	-0.0561893	0.961801	0.901975	0.947388	16.5092	21.2205	14.0126	19.3178	13.5988	21.2042	AL589765.4
ENSG00000180616	-0.0741501	0.949902	0.901917	0.947388	11.6535	9.09452	8.62313	14.7184	7.25268	8.92808	SSTR2
ENSG00000225663	-0.0173299	0.98806	0.901845	0.947388	1063.38	1184.31	1524.14	1230.82	1251.09	1334.75	MCRIP1
ENSG00000186660	0.0117297	1.00816	0.901499	0.947111	3519.36	3633.77	3051.51	3507.57	3382.47	3231.96	ZFP91
ENSG00000174606	-0.0161735	0.988852	0.90149	0.947111	1160.5	1071.13	870.936	1054.2	1122.35	960.884	ANGEL2
ENSG00000177483	0.0629714	1.04462	0.901133	0.946845	35.9317	23.2416	9.70102	17.478	25.3844	23.4362	RBM44
ENSG00000160783	0.0164487	1.01147	0.900976	0.946739	629.29	616.406	790.094	725.799	633.703	651.749	PMF1
ENSG00000265800	-0.0568281	0.961375	0.900933	0.946739	31.0761	22.2311	23.7136	12.8786	36.2634	31.2483	AC022211.3
ENSG00000233429	-0.0110782	0.992351	0.900872	0.946739	1106.11	1078.21	1092.98	1024.77	1134.14	1145.03	HOTAIRM1
ENSG00000241547	0.041332	1.02906	0.90058	0.9465	36.9028	27.2836	39.882	30.3566	37.17	33.4803	ACTG1P20
ENSG00000266402	-0.0236453	0.983744	0.900501	0.946475	134.015	139.449	184.319	163.742	159.559	140.617	SNHG25
ENSG00000266983	-0.0360156	0.975345	0.900428	0.946457	40.7873	39.4096	43.1157	38.6357	45.3292	42.4084	AC011444.1
ENSG00000179348	-0.0140288	0.990323	0.900285	0.946366	502.072	597.207	544.335	563.897	531.259	564.701	GATA2
ENSG00000010539	0.014895	1.01038	0.899917	0.946038	385.537	346.602	361.094	362.44	376.233	342.615	ZNF200
ENSG00000230701	-0.0717097	0.95151	0.899909	0.946038	8.74014	9.09452	20.4799	15.6383	9.97243	14.5081	FBXW4P1
ENSG00000112144	-0.0152882	0.989459	0.899787	0.946019	605.012	617.417	518.466	585.055	634.609	539.033	ICK
ENSG00000228818	-0.0407185	0.972171	0.899769	0.946019	35.9317	32.3361	31.2589	37.7158	35.3568	29.0162	AL359918.1
ENSG00000163681	-0.0158592	0.989067	0.899408	0.945738	2629.81	2833.45	2059.85	2568.35	2575.61	2463.03	SLMAP
ENSG00000151893	-0.0138813	0.990424	0.899396	0.945738	3455.27	3472.09	2744.31	3226.08	3321.73	3218.57	CACUL1
ENSG00000233045	0.0663247	1.04705	0.899318	0.945738	11.6535	22.2311	15.0905	9.19897	20.8515	16.7401	AC097523.1
ENSG00000161202	-0.0139061	0.990407	0.899213	0.94571	4376.87	4570.5	3793.1	4612.37	3843.92	4409.35	DVL3
ENSG00000272341	-0.0366733	0.9749	0.89915	0.945702	48.5563	52.5461	36.6483	42.3153	47.1424	52.4524	AL137003.2
ENSG00000134453	0.0122455	1.00852	0.899103	0.945702	3436.82	3542.82	4156.35	3753.18	3696.15	3590.2	RBM17
ENSG00000036054	0.0121547	1.00846	0.89899	0.945652	2443.35	2382.76	2064.16	2327.34	2334.46	2170.64	TBC1D23
ENSG00000229017	-0.0737794	0.950146	0.89843	0.945121	10.6824	11.1155	7.54524	11.9587	9.97243	8.92808	LINC01277
ENSG00000138081	0.0185368	1.01293	0.898414	0.945121	2273.41	2279.69	1580.19	2067.01	1948.25	2041.18	FBXO11
ENSG00000116731	-0.0127368	0.99121	0.898301	0.945104	1345.01	1408.64	1192.15	1359.61	1253.81	1369.34	PRDM2
ENSG00000100124	-0.0153805	0.989396	0.898291	0.945104	795.353	828.612	1018.61	860.104	894.799	915.128	ANKRD54
ENSG00000262728	-0.0921364	0.938133	0.898177	0.94509	18.4514	6.06301	6.46735	5.51938	9.06585	18.9722	AC123768.3
ENSG00000244926	-0.070986	0.951987	0.898119	0.94509	10.6824	12.126	8.62313	11.9587	9.97243	11.1601	ALKBH3-AS1
ENSG00000160256	0.0174076	1.01214	0.898114	0.94509	791.468	925.62	1060.65	1010.97	892.986	838.123	FAM207A
ENSG00000089505	0.0300746	1.02106	0.898069	0.94509	152.467	156.628	89.465	132.465	126.922	131.689	CMTM1
ENSG00000251595	0.034474	1.02418	0.898021	0.94509	79.6324	75.7877	64.6735	68.0724	92.4717	53.5685	ABCA11P
ENSG00000091106	-0.0557854	0.962071	0.897964	0.94509	17.4803	19.1995	29.1031	28.5168	23.5712	15.6241	NLRC4
ENSG00000120137	-0.0174007	0.988011	0.89778	0.945085	4438.05	4081.42	3094.63	4065.03	3969.94	3720.78	PANK3
ENSG00000272916	0.0619216	1.04386	0.897205	0.944597	20.3937	15.1575	21.5578	13.7985	13.5988	27.9002	AC022400.6
ENSG00000198604	0.0163789	1.01142	0.897097	0.944542	2479.29	2445.42	3188.4	2614.35	2899.26	2505.44	BAZ1A
ENSG00000135912	0.0132411	1.00922	0.896831	0.944321	1059.5	1074.16	907.585	1027.53	971.859	1015.57	TTLL4
ENSG00000182606	-0.0121595	0.991607	0.896576	0.944112	1736.37	1755.24	1523.06	1744.13	1608.28	1706.38	TRAK1
ENSG00000256683	-0.0231196	0.984102	0.896565	0.944112	146.64	153.596	119.646	135.225	145.96	146.197	ZNF350
ENSG00000261460	-0.0385445	0.973637	0.896261	0.943897	37.8739	42.4411	49.583	42.3153	38.9832	52.4524	AC009690.2
ENSG00000099910	0.0173632	1.01211	0.896218	0.943897	392.335	363.781	328.757	333.003	347.222	393.951	KLHL22
ENSG00000164045	-0.017684	0.987817	0.89618	0.943897	782.728	768.992	1011.06	939.215	828.619	824.731	CDC25A
ENSG00000188277	-0.0423243	0.971089	0.895954	0.94375	37.8739	27.2836	36.6483	36.7959	34.4502	33.4803	C15orf62
ENSG00000100441	-0.0145022	0.989998	0.895687	0.943528	1234.3	1313.65	1053.1	1230.82	1148.64	1259.97	KHNYN
ENSG00000240184	-0.0187962	0.987056	0.895355	0.943237	2089.86	2302.93	1589.89	2159.92	1865.75	2036.72	PCDHGC3
ENSG00000227694	-0.0526726	0.964149	0.895261	0.943197	24.2782	17.1785	24.7915	22.0775	26.291	20.0882	RPL23AP74
ENSG00000135749	-0.020914	0.985608	0.895105	0.943091	878.87	907.431	612.242	803.99	758.812	872.719	PCNX2
ENSG00000124151	-0.0224418	0.984565	0.894919	0.942954	2705.56	2793.03	1713.85	2501.2	2397.01	2428.44	NCOA3
ENSG00000280025	-0.0802028	0.945925	0.894425	0.942492	4.85563	13.1365	15.0905	11.0388	13.5988	10.0441	AL008638.6
ENSG00000254505	0.0288545	1.0202	0.89442	0.942492	75.7479	82.8612	95.9323	88.3101	76.1531	84.8167	CHMP4A
ENSG00000274026	0.0561061	1.03966	0.894365	0.942492	39.8162	16.168	24.7915	25.7571	25.3844	26.7842	FAM27E3
ENSG00000176444	-0.0111838	0.992278	0.894326	0.942492	1502.33	1402.58	1379.7	1383.53	1442.38	1494.34	CLK2
ENSG00000254595	0.0439418	1.03093	0.89417	0.942458	30.1049	39.4096	31.2589	32.1964	36.2634	29.0162	AC084337.1
ENSG00000156172	0.021585	1.01507	0.893988	0.942325	240.839	218.268	187.553	194.098	210.328	234.362	C8orf37
ENSG00000115257	-0.0322262	0.97791	0.893816	0.942203	181.601	190.985	104.555	159.142	145.96	184.142	PCSK4
ENSG00000124207	0.00833373	1.00579	0.893744	0.942186	14925.2	14639.1	15072.2	15274.9	14749.2	14353	CSE1L
ENSG00000111669	0.0133989	1.00933	0.893737	0.942186	22489.3	23543.7	28052.1	24645	23928.4	24825.6	TPI1
ENSG00000226360	-0.0350506	0.975998	0.893703	0.942186	52.4408	52.5461	74.3745	58.8734	58.928	65.8446	RPL10AP6
ENSG00000165458	-0.0108696	0.992494	0.893418	0.942018	6263.77	6345.95	5876.66	6007.85	5960.8	6661.46	INPPL1
ENSG00000112599	0.0794831	1.05664	0.893308	0.941961	20.3937	8.08402	11.8568	18.3979	11.7856	7.81207	GUCA1B
ENSG00000177646	-0.0123173	0.991499	0.893113	0.941814	1991.78	2034.14	2319.62	2165.44	2059.76	2173.99	ACAD9
ENSG00000238795	0.0747855	1.0532	0.892577	0.941307	6.79789	18.189	25.8694	14.7184	14.5054	18.9722	SCARNA12
ENSG00000128886	0.0468821	1.03303	0.892562	0.941307	28.1627	29.3046	36.6483	32.1964	24.4778	34.5963	ELL3
ENSG00000174233	-0.0167006	0.988491	0.892516	0.941307	2400.62	2561.62	1892.78	2366.9	2214.79	2354.78	ADCY6
ENSG00000260342	0.085783	1.06126	0.892475	0.941307	15.538	6.06301	9.70102	6.43928	9.97243	13.3921	AC138811.2
ENSG00000269427	-0.0578843	0.960672	0.892465	0.941307	27.1915	25.2626	60.3619	26.677	48.049	42.4084	AC024075.3
ENSG00000115486	0.0145403	1.01013	0.892115	0.941114	2205.43	2197.84	1824.87	2062.41	1926.49	2179.57	GGCX
ENSG00000178974	-0.0136895	0.990556	0.892074	0.941114	924.512	906.421	809.496	898.74	929.25	837.007	FBXO34
ENSG00000125870	-0.0231715	0.984067	0.891755	0.940911	1662.57	1655.2	2588.02	1996.18	2070.64	1932.93	SNRPB2
ENSG00000280927	-0.0341379	0.976615	0.891562	0.940766	99.0549	73.7667	66.8293	69.9122	80.6861	95.9768	CTBP1-AS
ENSG00000151131	-0.0173247	0.988063	0.891456	0.940712	435.065	410.264	520.622	466.388	454.199	460.912	C12orf45
ENSG00000267419	0.0584951	1.04138	0.891409	0.940712	17.4803	17.1785	26.9473	21.1576	20.8515	16.7401	AC011477.1
ENSG00000231551	0.0567172	1.0401	0.89139	0.940712	35.9317	24.2521	16.1684	23.9173	26.291	23.4362	AC245100.4
ENSG00000094914	-0.0104814	0.992761	0.891307	0.940712	1463.49	1506.66	1561.86	1518.75	1499.49	1546.79	AAAS
ENSG00000236814	0.0780172	1.05557	0.891275	0.940712	9.71127	14.147	24.7915	11.9587	23.5712	10.0441	AC046176.1
ENSG00000174989	0.0246234	1.01721	0.891253	0.940712	1076.01	1025.66	644.579	890.461	876.668	934.1	FBXW8
ENSG00000182578	-0.0418307	0.971421	0.891246	0.940712	57.2965	59.6196	68.985	44.1551	58.928	89.2808	CSF1R
ENSG00000278765	0.0709179	1.05038	0.891179	0.940712	8.74014	21.2205	15.0905	14.7184	13.5988	14.5081	AC004477.3
ENSG00000159217	-0.0799248	0.946107	0.890981	0.940681	9.71127	15.1575	10.7789	7.35918	19.0383	11.1601	IGF2BP1
ENSG00000169871	0.00883692	1.00614	0.890926	0.940681	8401.22	8092.1	8457.14	8031.62	8486.54	8279.67	TRIM56
ENSG00000167595	0.0148919	1.01038	0.890584	0.940379	773.988	746.761	648.891	746.957	698.07	703.086	PROSER3
ENSG00000233873	-0.075548	0.948982	0.890545	0.940379	6.79789	14.147	21.5578	14.7184	16.3185	13.3921	RPL7P44
ENSG00000274354	-0.0617994	0.958068	0.890525	0.940379	16.5092	13.1365	22.6357	19.3178	17.2251	17.8562	AC105105.4
ENSG00000139908	0.0430924	1.03032	0.890485	0.940379	79.6324	76.7982	43.1157	53.354	58.928	82.5847	TSSK4
ENSG00000006757	0.0152019	1.01059	0.890412	0.940379	463.227	480.999	466.727	450.75	502.248	441.94	PNPLA4
ENSG00000232995	-0.0390714	0.973281	0.890075	0.940136	40.7873	53.5566	43.1157	49.6745	42.6095	49.1044	AL592435.1
ENSG00000196865	0.0197522	1.01379	0.890005	0.94012	2138.42	2028.08	1477.79	1825.08	1960.94	1782.27	NHLRC2
ENSG00000138696	-0.020952	0.985582	0.889926	0.940096	189.37	166.733	172.463	180.3	177.691	178.562	BMPR1B
ENSG00000147316	-0.0162335	0.988811	0.88978	0.94	335.039	353.676	340.614	353.241	329.09	359.355	MCPH1
ENSG00000197808	-0.0265049	0.981796	0.889759	0.94	110.708	122.271	101.322	105.788	124.202	110.485	ZNF461
ENSG00000115138	0.505418	1.41953	0.889732	0.94	0	0	58.2061	11.9587	29.0107	0	POMC
ENSG00000101473	-0.0160843	0.988913	0.88952	0.939901	494.303	566.892	598.23	539.98	552.11	585.905	ACOT8
ENSG00000198237	0.0812164	1.05791	0.889378	0.93981	16.5092	8.08402	11.8568	10.1189	16.3185	7.81207	AC131392.1
ENSG00000203279	0.045075	1.03174	0.889349	0.93981	37.8739	38.3991	56.0504	53.354	35.3568	39.0603	AL590705.1
ENSG00000283689	0.0520554	1.03674	0.889349	0.93981	31.0761	31.3256	20.4799	27.5969	29.9173	22.3202	AC018553.2
ENSG00000134297	-0.0257565	0.982305	0.889304	0.93981	154.409	141.47	127.191	148.103	123.296	160.705	PLEKHA8P1
ENSG00000118960	0.0124163	1.00864	0.889286	0.93981	936.166	1011.51	973.336	975.091	921.997	999.944	HS1BP3
ENSG00000138750	-0.0145096	0.989993	0.888728	0.939417	1769.39	1511.71	1838.88	1720.21	1805.92	1643.88	NUP54
ENSG00000218175	-0.0317367	0.978242	0.888633	0.939375	76.719	94.9872	119.646	101.189	92.4717	103.789	AC016739.1
ENSG00000137764	-0.0146936	0.989867	0.888578	0.939375	470.025	507.272	471.039	482.026	504.061	476.536	MAP2K5
ENSG00000249915	0.010877	1.00757	0.888489	0.939341	4583.72	4548.27	5097.35	4726.43	4660.75	4734.11	PDCD6
ENSG00000262712	0.069492	1.04935	0.888469	0.939341	20.3937	18.189	51.7388	18.3979	30.8239	36.8283	AC012676.1
ENSG00000198925	-0.0100916	0.993029	0.888326	0.939286	3388.26	3537.77	3450.33	3544.36	3321.73	3584.62	ATG9A
ENSG00000169598	-0.019437	0.986618	0.88832	0.939286	257.349	235.447	269.473	275.969	256.564	238.826	DFFB
ENSG00000107902	0.0188146	1.01313	0.888287	0.939286	271.915	283.951	253.304	257.571	254.75	287.93	LHPP
ENSG00000256238	-0.056519	0.961581	0.88823	0.939286	29.1338	17.1785	33.4146	32.1964	29.0107	21.2042	SUPT16HP1
ENSG00000175691	-0.0213734	0.985294	0.888135	0.939286	172.861	189.974	210.189	195.018	194.916	190.838	ZNF77
ENSG00000227477	0.0718108	1.05104	0.888083	0.939286	12.6246	25.2626	15.0905	11.0388	16.3185	23.4362	STK4-AS1
ENSG00000147475	-0.0142702	0.990157	0.888077	0.939286	1566.43	1644.09	1345.21	1499.43	1563.86	1538.98	ERLIN2
ENSG00000261884	-0.0281001	0.980711	0.88802	0.939286	100.026	120.25	115.334	114.067	128.735	98.2088	AC040162.1
ENSG00000006625	0.0181491	1.01266	0.887958	0.939286	1420.76	1381.36	1863.67	1525.19	1552.98	1527.82	GGCT
ENSG00000174165	0.0163502	1.0114	0.887853	0.939286	584.618	684.11	712.486	642.088	689.911	624.965	ZDHHC24
ENSG00000117519	-0.0145044	0.989997	0.887833	0.939286	13471.5	13532.6	16676.1	14869.2	14765.5	14484.7	CNN3
ENSG00000126821	-0.0168176	0.988411	0.887689	0.939259	741.941	684.11	582.061	660.486	697.164	675.186	SGPP1
ENSG00000225695	0.0604968	1.04282	0.887615	0.93924	17.4803	20.21	20.4799	20.2377	14.5054	21.2042	HNRNPA1P35
ENSG00000270705	-0.0883731	0.940583	0.887366	0.939034	7.76901	11.1155	14.0126	11.9587	5.43951	17.8562	AL161669.2
ENSG00000099834	-0.0620049	0.957932	0.887319	0.939034	81.5746	57.5986	35.5704	40.4755	101.538	40.1763	CDHR5
ENSG00000198064	0.0559317	1.03953	0.887234	0.939012	29.1338	19.1995	24.7915	24.8372	19.0383	26.7842	NPIPB13
ENSG00000196951	0.0468257	1.03299	0.887103	0.938932	33.9894	43.4516	28.0252	32.1964	34.4502	35.7123	SCOC-AS1
ENSG00000231203	0.0771887	1.05496	0.886907	0.938784	20.3937	8.08402	17.2463	19.3178	12.6922	11.1601	KRT8P10
ENSG00000113838	-0.0171531	0.988181	0.88679	0.938719	392.335	373.886	343.847	382.677	352.662	389.487	TBCCD1
ENSG00000170889	-0.0205645	0.985847	0.886658	0.938638	14431.9	15159.6	21245.2	17005.2	17560.5	16999.1	RPS9
ENSG00000235036	-0.0739981	0.950002	0.886626	0.938638	16.5092	11.1155	10.7789	12.8786	16.3185	11.1601	AL035456.1
ENSG00000090372	0.0117642	1.00819	0.886608	0.938638	3741.75	3906.6	4182.22	4000.63	3695.24	4038.84	STRN4
ENSG00000236772	-0.0839011	0.943503	0.886558	0.938638	23.307	18.189	6.46735	9.19897	20.8515	21.2042	AL034550.1
ENSG00000184992	0.0135939	1.00947	0.886446	0.938638	1528.55	1511.71	1761.27	1581.3	1637.29	1535.63	BRI3BP
ENSG00000205710	-0.0688146	0.953421	0.886399	0.938638	12.6246	15.1575	18.3242	14.7184	12.6922	21.2042	C17orf107
ENSG00000083817	0.0274116	1.01918	0.886292	0.938604	97.1127	119.239	119.646	106.708	114.23	108.253	ZNF416
ENSG00000277449	-0.0560078	0.961922	0.886289	0.938604	36.9028	25.2626	18.3242	26.677	26.291	31.2483	CEBPB-AS1
ENSG00000111445	-0.0104638	0.992773	0.885957	0.938366	1839.31	1759.28	1775.29	1827.84	1816.8	1767.76	RFC5
ENSG00000259209	0.0697129	1.04951	0.885859	0.938321	20.3937	17.1785	11.8568	20.2377	14.5054	12.2761	AC004943.1
ENSG00000245904	-0.0840863	0.943382	0.885664	0.938174	10.6824	11.1155	12.9347	6.43928	11.7856	18.9722	AC025164.1
ENSG00000218582	0.0410575	1.02887	0.88564	0.938174	58.2676	41.4306	43.1157	45.075	47.1424	46.8724	GAPDHP63
ENSG00000171450	0.0389008	1.02733	0.885307	0.937912	57.2965	47.4936	47.4272	45.9949	48.049	54.6845	CDK5R2
ENSG00000224578	0.02127	1.01485	0.885184	0.937841	219.475	227.363	266.239	250.212	224.833	226.55	HNRNPA1P48
ENSG00000004838	-0.0451695	0.969176	0.885084	0.937794	42.7296	32.3361	33.4146	35.876	36.2634	40.1763	ZMYND10
ENSG00000222043	-0.0782036	0.947236	0.885064	0.937794	13.5958	11.1155	10.7789	16.5582	11.7856	8.92808	AC079305.1
ENSG00000138442	0.0126252	1.00879	0.884884	0.9377	1768.42	1760.29	1994.1	1865.55	1825.86	1781.15	WDR12
ENSG00000186710	0.0852622	1.06088	0.884717	0.937581	8.74014	9.09452	17.2463	8.27908	14.5054	10.0441	CFAP73
ENSG00000260884	0.0696002	1.04943	0.884712	0.937581	27.1915	24.2521	9.70102	18.3979	19.0383	21.2042	AC009120.3
ENSG00000212493	-0.0787958	0.946848	0.884655	0.937581	17.4803	11.1155	8.62313	14.7184	14.5054	10.0441	SNORD19
ENSG00000250988	-0.0328977	0.977455	0.88464	0.937581	97.1127	82.8612	111.023	88.3101	89.7519	120.529	SNHG21
ENSG00000276550	0.0177666	1.01239	0.884234	0.937304	1072.12	985.24	826.743	941.975	899.332	1009.99	HERC2P2
ENSG00000159761	-0.0589811	0.959942	0.884187	0.937304	20.3937	21.2205	18.3242	19.3178	19.9449	23.4362	C16orf86
ENSG00000217094	-0.032715	0.977579	0.884136	0.937304	96.1415	79.8297	119.646	89.23	106.977	106.021	PPIAP31
ENSG00000230373	-0.0588562	0.960025	0.883901	0.937128	28.1627	21.2205	17.2463	24.8372	24.4778	20.0882	GOLGA6L5P
ENSG00000119684	-0.0171906	0.988155	0.883867	0.937128	544.802	528.493	451.636	522.502	492.276	530.104	MLH3
ENSG00000167862	-0.0228203	0.984307	0.883761	0.937097	949.762	873.074	1305.33	1126.87	1000.87	1049.05	MRPL58
ENSG00000110321	-0.00856382	0.994082	0.883701	0.937093	38496.4	39411.6	38212.3	39910.7	38526.2	38374	EIF4G2
ENSG00000186523	0.0376876	1.02647	0.883616	0.937061	51.4697	79.8297	71.1408	63.4729	63.4609	70.3086	FAM86B1
ENSG00000101901	0.0132108	1.0092	0.883549	0.937049	967.242	967.051	944.233	949.334	897.519	1007.76	ALG13
ENSG00000139890	0.084663	1.06044	0.883486	0.93704	11.6535	18.189	7.54524	12.8786	8.15926	14.5081	REM2
ENSG00000127589	0.0212485	1.01484	0.88321	0.936807	189.37	206.142	194.02	197.778	185.85	197.534	TUBBP1
ENSG00000262089	0.0537506	1.03796	0.883189	0.936807	31.0761	22.2311	34.4925	23.9173	32.6371	27.9002	AC040977.1
ENSG00000273680	0.0648098	1.04595	0.882836	0.936528	33.9894	26.2731	18.3242	28.5168	31.7305	14.5081	AC009318.2
ENSG00000102805	0.0229922	1.01606	0.882765	0.936511	243.753	290.014	288.875	255.731	310.052	242.174	CLN5
ENSG00000271936	0.0231418	1.01617	0.882629	0.936426	178.687	187.953	198.332	164.662	193.103	198.65	AC012073.1
ENSG00000163635	0.0189413	1.01322	0.882365	0.936204	1145.93	1158.04	877.404	1018.33	1097.87	1024.5	ATXN7
ENSG00000253106	0.0377026	1.02648	0.881964	0.935838	67.9789	50.5251	59.284	57.0336	56.2083	60.2645	AC090198.1
ENSG00000023041	0.0132017	1.00919	0.881852	0.935777	1568.37	1600.64	1789.3	1651.22	1587.43	1674.01	ZDHHC6
ENSG00000219470	0.0434007	1.03054	0.881526	0.93549	48.5563	39.4096	57.1282	54.2739	42.6095	43.5244	AL355802.1
ENSG00000131368	-0.0191207	0.986834	0.881511	0.93549	980.838	868.021	1159.81	1003.61	957.354	1088.11	MRPS25
ENSG00000198042	-0.0182356	0.98744	0.881481	0.93549	551.6	586.091	704.941	614.491	631.89	618.269	MAK16
ENSG00000167670	0.0138578	1.00965	0.881426	0.93549	3552.38	3530.7	4169.28	3673.15	3665.32	3805.59	CHAF1A
ENSG00000156256	-0.0166524	0.988524	0.881318	0.93549	2018.97	1948.25	2427.41	2255.59	2193.94	2016.63	USP16
ENSG00000234241	-0.0650549	0.955909	0.881104	0.935336	20.3937	17.1785	19.402	19.3178	25.3844	14.5081	AL109618.1
ENSG00000273796	-0.0485901	0.966881	0.880732	0.935	57.2965	31.3256	47.4272	38.6357	48.9556	53.5685	BX322562.1
ENSG00000176472	-0.0513165	0.965055	0.880729	0.935	32.0472	36.3781	42.0378	48.7546	38.0766	26.7842	ZNF575
ENSG00000112130	0.0161394	1.01125	0.880399	0.934763	758.45	726.551	875.248	779.153	759.718	794.599	RNF8
ENSG00000222014	0.0879573	1.06286	0.880301	0.934719	10.6824	9.09452	12.9347	13.7985	9.97243	6.69606	RAB6C
ENSG00000198711	-0.060694	0.958803	0.880276	0.934719	26.2204	18.189	24.7915	28.5168	18.1317	25.6682	SSBP3-AS1
ENSG00000177173	0.0726084	1.05162	0.880187	0.934714	15.538	15.1575	14.0126	12.8786	17.2251	12.2761	NAP1L4P1
ENSG00000214655	-0.016459	0.988656	0.880082	0.934662	1960.7	1901.77	1607.14	1791.04	1752.43	1992.08	ZSWIM8
ENSG00000115053	0.0191042	1.01333	0.879769	0.934388	33390.2	34269.2	45586.2	37627.5	37329.5	36797.1	NCL
ENSG00000258539	0.0904212	1.06468	0.879648	0.934319	14.5669	9.09452	7.54524	8.27908	9.06585	12.2761	AC068896.1
ENSG00000267397	0.0949971	1.06806	0.879357	0.934068	11.6535	6.06301	15.0905	6.43928	9.97243	14.5081	AC090229.1
ENSG00000225507	0.0343683	1.02411	0.879252	0.934015	104.882	76.7982	98.0881	78.1913	102.444	92.6288	AC069282.1
ENSG00000128228	0.0273393	1.01913	0.879098	0.933911	780.786	833.664	1270.83	884.021	971.859	974.276	SDF2L1
ENSG00000237380	-0.0206957	0.985757	0.878562	0.933399	244.724	247.573	246.837	271.37	234.805	243.29	HOXD-AS2
ENSG00000279488	-0.0599087	0.959325	0.878473	0.933363	23.307	25.2626	18.3242	21.1576	26.291	22.3202	AC004623.1
ENSG00000183048	0.0180627	1.0126	0.878448	0.933363	1303.25	1333.86	1680.43	1440.56	1408.83	1412.87	SLC25A10
ENSG00000156467	-0.0186317	0.987169	0.878394	0.933363	5381.01	5283.92	6990.13	5936.1	6186.54	5759.72	UQCRB
ENSG00000259940	-0.0924442	0.937932	0.878343	0.933363	5.82676	11.1155	15.0905	8.27908	14.5054	11.1601	AC109449.1
ENSG00000257740	-0.04423	0.969807	0.87802	0.933118	41.7584	40.4201	58.2061	48.7546	50.7688	44.6404	AC073896.3
ENSG00000215156	-0.0612199	0.958453	0.877986	0.933118	44.6718	27.2836	25.8694	22.0775	43.5161	36.8283	AC138409.1
ENSG00000198836	0.0142694	1.00994	0.877539	0.932723	5361.59	5188.93	4481.87	4919.61	5117.67	4847.94	OPA1
ENSG00000110880	-0.00938033	0.993519	0.877074	0.932288	12168.2	12491.8	12762.2	12770	12380.3	12514.9	CORO1C
ENSG00000279452	0.0681265	1.04835	0.877069	0.932288	36.9028	25.2626	20.4799	30.3566	33.5436	14.5081	AC006277.1
ENSG00000163655	0.0109053	1.00759	0.877035	0.932288	5385.87	5675.99	5892.83	5532.26	5729.62	5563.31	GMPS
ENSG00000143153	-0.0210937	0.985485	0.876864	0.93224	13322.9	13819.6	9625.57	12247.5	12312.3	12751.5	ATP1B1
ENSG00000127540	0.0218775	1.01528	0.876863	0.93224	1828.63	1836.08	2565.38	2052.29	1992.67	2090.29	UQCR11
ENSG00000243753	0.0261139	1.01827	0.876759	0.93224	129.16	135.407	137.97	126.946	132.361	136.153	HLA-L
ENSG00000233621	-0.0319144	0.978122	0.87613	0.931635	134.987	98.0187	144.437	136.145	129.642	119.413	LINC01137
ENSG00000164002	-0.0222137	0.984721	0.876052	0.931611	263.175	283.951	322.29	266.77	310.052	305.787	EXO5
ENSG00000070371	0.0320132	1.02244	0.87597	0.931583	935.195	849.832	507.687	728.559	690.818	824.731	CLTCL1
ENSG00000241352	-0.0797362	0.946231	0.875867	0.931532	14.5669	9.09452	15.0905	12.8786	13.5988	14.5081	AC007688.1
ENSG00000065518	0.0148773	1.01037	0.875769	0.931486	2946.4	3036.56	3529.02	3150.65	3048.85	3214.11	NDUFB4
ENSG00000085377	-0.013526	0.990668	0.875705	0.931476	1415.9	1531.92	1606.06	1522.43	1499.49	1574.69	PREP
ENSG00000234290	-0.0508752	0.965351	0.87558	0.931402	40.7873	33.3466	30.181	34.9561	41.7029	31.2483	AC116366.1
ENSG00000207507	0.11455	1.08264	0.875225	0.931083	11.6535	3.03151	21.5578	10.1189	16.3185	6.69606	RNU6-9
ENSG00000235082	0.0710613	1.05049	0.875222	0.931083	17.4803	19.1995	15.0905	14.7184	19.9449	14.5081	SUMO1P3
ENSG00000244617	0.0801058	1.0571	0.875151	0.931083	11.6535	17.1785	12.9347	13.7985	15.4119	10.0441	ASPRV1
ENSG00000121897	0.016032	1.01117	0.874702	0.930703	479.737	476.957	497.986	480.186	487.743	469.84	LIAS
ENSG00000230629	-0.0363689	0.975106	0.874501	0.930547	67.9789	65.6826	84.0755	75.4316	77.9663	69.1926	RPS23P8
ENSG00000149311	-0.0314985	0.978404	0.87434	0.930435	2174.35	2057.38	1169.51	1810.36	1823.14	1888.29	ATM
ENSG00000131018	-0.0259792	0.982154	0.874194	0.930337	2484.14	2455.52	1582.34	2221.55	2278.25	2141.62	SYNE1
ENSG00000184967	0.0207322	1.01447	0.874168	0.930337	760.392	834.675	1032.62	866.543	832.245	890.576	NOC4L
ENSG00000262619	-0.0775963	0.947635	0.874165	0.930337	19.4225	12.126	20.4799	13.7985	26.291	14.5081	LINC00621
ENSG00000256673	0.0556203	1.03931	0.873858	0.930156	41.7584	40.4201	24.7915	39.5556	35.3568	27.9002	AC141557.1
ENSG00000172943	-0.0168977	0.988356	0.873853	0.930156	1215.85	1227.76	1021.84	1165.51	1117.82	1225.38	PHF8
ENSG00000236423	-0.0401849	0.97253	0.873696	0.930101	61.181	70.7352	77.6082	63.4729	63.4609	89.2808	LINC01134
ENSG00000272644	0.0782741	1.05575	0.873614	0.930072	17.4803	10.105	26.9473	17.478	17.2251	16.7401	AC097468.3
ENSG00000120049	0.052688	1.0372	0.873469	0.929976	73.8056	67.7037	40.9599	40.4755	73.4334	62.4965	KCNIP2
ENSG00000127870	0.0156769	1.01093	0.873397	0.929958	2242.33	2235.23	1922.96	2166.36	2191.22	1973.1	RNF6
ENSG00000131470	-0.01695	0.98832	0.873321	0.929935	584.618	620.448	661.825	670.605	601.066	616.037	PSMC3IP
ENSG00000262904	-0.0916169	0.93847	0.873279	0.929935	21.3648	12.126	7.54524	17.478	17.2251	8.92808	TMPOP2
ENSG00000164654	-0.0174731	0.987962	0.873234	0.929935	856.534	969.072	786.861	907.939	846.75	890.576	MIOS
ENSG00000230424	0.0630581	1.04468	0.873151	0.929931	32.0472	19.1995	28.0252	30.3566	19.9449	25.6682	AL035413.1
ENSG00000250548	-0.0693139	0.953091	0.873121	0.929931	13.5958	22.2311	29.1031	20.2377	26.291	21.2042	LINC01303
ENSG00000264235	0.0688242	1.04886	0.873066	0.929931	22.3359	17.1785	34.4925	21.1576	29.9173	18.9722	AP005329.1
ENSG00000232600	-0.0662863	0.955093	0.872918	0.929858	15.538	24.2521	28.0252	20.2377	28.1041	22.3202	TONSL-AS1
ENSG00000172053	0.0109075	1.00759	0.872776	0.929766	5272.25	5443.58	5710.67	5430.15	5362.45	5509.74	QARS
ENSG00000054116	0.0206778	1.01444	0.872766	0.929766	1893.7	1979.57	2584.78	2154.4	2058.85	2151.67	TRAPPC3
ENSG00000162378	-0.0271387	0.981365	0.872745	0.929766	1927.69	1814.86	1179.21	1691.69	1636.39	1688.52	ZYG11B
ENSG00000180376	-0.0213864	0.985285	0.872714	0.929766	430.209	338.518	360.016	368.879	387.112	390.603	CCDC66
ENSG00000213793	0.0465044	1.03276	0.872711	0.929766	56.3253	54.5671	36.6483	48.7546	44.4227	50.2204	ZNF888
ENSG00000116266	0.0127047	1.00885	0.872561	0.929766	1558.66	1614.78	1518.75	1553.71	1602.84	1493.22	STXBP3
ENSG00000197019	0.0266797	1.01867	0.872423	0.929741	233.07	290.014	340.614	266.77	283.761	296.859	SERTAD1
ENSG00000261512	-0.0326612	0.977615	0.872323	0.929693	94.1993	91.9557	114.256	107.628	92.4717	107.137	AC092368.3
ENSG00000247809	0.039727	1.02792	0.872262	0.929686	65.0655	58.6091	53.8946	59.7933	56.2083	56.9165	NR2F2-AS1
ENSG00000250608	0.0653237	1.04632	0.872247	0.929686	31.0761	17.1785	22.6357	22.9974	23.5712	21.2042	AC010210.1
ENSG00000143847	0.0300766	1.02107	0.872028	0.929555	138.871	128.334	107.789	129.706	120.576	117.181	PPFIA4
ENSG00000261485	-0.0406046	0.972247	0.871753	0.929321	51.4697	57.5986	63.5956	57.9535	64.3675	54.6845	PAN3-AS1
ENSG00000133065	-0.0190067	0.986912	0.871533	0.929144	2037.42	2134.18	1624.38	2015.5	1931.03	1927.35	SLC41A1
ENSG00000101365	-0.0216365	0.985115	0.871268	0.92892	2005.38	2174.6	2799.28	2462.57	2229.29	2391.61	IDH3B
ENSG00000270083	0.112737	1.08128	0.871264	0.92892	16.5092	8.08402	11.8568	2.75969	14.5054	16.7401	AL021878.2
ENSG00000088756	0.0216786	1.01514	0.871201	0.92892	706.98	684.11	532.478	631.05	602.879	662.91	ARHGAP28
ENSG00000107890	-0.0224883	0.984533	0.8712	0.92892	841.967	750.803	1007.83	876.662	970.046	792.367	ANKRD26
ENSG00000150867	-0.0158592	0.989067	0.870931	0.928795	5301.38	5558.77	4602.6	5463.27	4939.98	5231.85	PIP4K2A
ENSG00000161551	-0.0497728	0.966088	0.870688	0.928595	44.6718	33.3466	40.9599	41.3954	35.3568	46.8724	ZNF577
ENSG00000172780	-0.0248211	0.982942	0.870541	0.928496	280.656	319.319	234.98	288.848	269.256	292.394	RAB43
ENSG00000185697	-0.0175354	0.987919	0.870479	0.928489	4972.17	4632.14	3862.08	4642.72	4531.11	4458.46	MYBL1
ENSG00000107223	-0.0217543	0.985034	0.870337	0.928396	6346.31	6615.76	8905.54	7546.84	7410.43	7240.67	EDF1
ENSG00000248487	0.0323134	1.02265	0.870264	0.928377	98.0838	95.9977	112.101	103.948	90.6585	104.905	ABHD14A
ENSG00000214653	-0.0823771	0.9445	0.870243	0.928377	13.5958	18.189	19.402	9.19897	21.758	23.4362	HNRNPA3P3
ENSG00000259349	-0.0829942	0.944096	0.870229	0.928377	11.6535	17.1785	10.7789	14.7184	11.7856	15.6241	AC011921.1
ENSG00000168883	-0.015751	0.989142	0.870209	0.928377	2490.94	2517.16	2977.14	2728.42	2644.51	2698.51	USP39
ENSG00000187609	0.0245918	1.01719	0.870028	0.928359	266.089	284.962	270.551	226.295	291.014	291.278	EXD3
ENSG00000280010	0.0695135	1.04936	0.869874	0.928253	20.3937	28.2941	22.6357	14.7184	23.5712	30.1323	AP001350.2
ENSG00000135720	-0.0210254	0.985532	0.869515	0.92793	5720.91	5792.2	4256.59	5235.14	5179.32	5588.98	DYNC1LI2
ENSG00000263335	-0.0623099	0.957729	0.869331	0.927791	36.9028	26.2731	19.402	30.3566	27.1975	29.0162	AF001548.2
ENSG00000151806	-0.0140874	0.990283	0.869177	0.927686	2122.88	2021	1877.69	2088.17	2052.51	1939.62	GUF1
ENSG00000273432	-0.0961217	0.935545	0.869138	0.927686	13.5958	7.07352	12.9347	16.5582	8.15926	11.1601	AC004951.4
ENSG00000251365	-0.0885066	0.940496	0.868955	0.927566	12.6246	12.126	14.0126	11.9587	19.9449	8.92808	AC122710.2
ENSG00000118965	-0.0193892	0.98665	0.86884	0.927502	1124.56	1116.61	889.26	1087.32	1019	1068.02	WDR35
ENSG00000206838	-0.0986315	0.933918	0.868584	0.927287	14.5669	11.1155	7.54524	7.35918	10.879	17.8562	SNORA5A
ENSG00000144048	0.0171557	1.01196	0.868556	0.927287	751.652	706.341	819.197	769.954	770.597	707.55	DUSP11
ENSG00000236104	0.015937	1.01111	0.867951	0.926728	583.647	569.923	573.438	564.817	559.363	584.789	ZBTB22
ENSG00000054277	-0.028065	0.980735	0.867947	0.926728	805.064	832.654	536.79	768.114	687.191	763.35	OPN3
ENSG00000258559	0.0707321	1.05025	0.867852	0.926728	28.1627	17.1785	32.3367	17.478	24.4778	32.3643	AC005519.1
ENSG00000104763	-0.0142003	0.990205	0.867481	0.926402	2058.79	2062.44	1976.85	2098.29	2160.39	1897.22	ASAH1
ENSG00000003393	-0.0175788	0.987889	0.866966	0.925911	3176.56	3194.2	2576.16	3073.38	3023.46	2960.77	ALS2
ENSG00000100867	-0.0817998	0.944878	0.866724	0.92571	12.6246	18.189	21.5578	11.9587	25.3844	17.8562	DHRS2
ENSG00000167965	0.0195021	1.01361	0.86647	0.925497	1127.48	1264.14	1461.62	1232.66	1244.74	1323.59	MLST8
ENSG00000187951	-0.0228002	0.98432	0.866464	0.925497	1621.78	1578.4	1182.45	1429.52	1430.59	1594.78	ARHGAP11B
ENSG00000279179	-0.0971558	0.934874	0.86623	0.925359	12.6246	7.07352	16.1684	15.6383	14.5054	7.81207	AL662907.2
ENSG00000176183	-0.0739258	0.950049	0.866188	0.925359	18.4514	14.147	18.3242	17.478	17.2251	18.9722	AC233964.1
ENSG00000169032	-0.0123486	0.991477	0.866149	0.925359	3095.95	3323.54	3303.74	3354.87	3164.89	3286.65	MAP2K1
ENSG00000167900	-0.0206418	0.985794	0.865984	0.925271	6072.45	6315.64	8143.47	6994.9	6702.38	7129.07	TK1
ENSG00000122432	0.0710069	1.05045	0.865713	0.92504	33.0183	40.4201	15.0905	30.3566	26.291	27.9002	SPATA1
ENSG00000231609	-0.0600419	0.959236	0.865442	0.924809	36.9028	52.5461	25.8694	43.2352	44.4227	32.3643	AC009501.1
ENSG00000258881	-0.0904654	0.93922	0.865244	0.924655	8.74014	13.1365	14.0126	10.1189	13.5988	14.5081	AC007040.2
ENSG00000168610	0.0147828	1.0103	0.865127	0.924589	5921.93	6279.26	5301.07	5662.89	5850.19	5812.18	STAT3
ENSG00000270012	0.0456116	1.03212	0.865051	0.924567	59.2387	51.5356	45.2714	47.8347	54.3951	49.1044	AC232271.1
ENSG00000159882	0.0322138	1.02258	0.864987	0.924556	110.708	126.313	123.958	108.548	133.268	110.485	ZNF230
ENSG00000197714	-0.0585982	0.960197	0.86482	0.924436	91.2859	101.05	43.1157	74.5117	106.977	63.6125	ZNF460
ENSG00000276529	0.0388114	1.02727	0.86482	0.924436	161.207	169.764	268.395	187.659	170.438	225.434	AP001505.1
ENSG00000205765	-0.0253221	0.982601	0.864811	0.924436	2131.62	2192.79	1475.63	1954.78	1957.32	1992.08	C5orf51
ENSG00000255737	-0.0282027	0.980641	0.864673	0.924436	494.303	562.85	769.614	624.61	601.066	636.125	AGAP2-AS1
ENSG00000143630	-0.0186056	0.987186	0.864497	0.924325	502.072	494.136	459.182	466.388	488.649	521.176	HCN3
ENSG00000212232	-0.0502387	0.965777	0.864433	0.924315	47.5852	34.3571	47.4272	48.7546	42.6095	42.4084	SNORD17
ENSG00000048028	0.0230114	1.01608	0.864427	0.924315	1065.33	1086.29	796.562	946.574	1007.22	948.608	USP28
ENSG00000116883	-0.0352768	0.975845	0.864411	0.924315	98.0838	112.166	88.3871	107.628	89.7519	109.369	AL591845.1
ENSG00000119929	0.017998	1.01255	0.863999	0.924026	576.849	626.511	651.046	640.249	611.038	578.093	CUTC
ENSG00000162923	0.0194902	1.0136	0.863907	0.923986	5290.7	5373.85	4139.1	4855.22	4832.1	4919.37	WDR26
ENSG00000251201	0.0572296	1.04047	0.863867	0.923986	42.7296	32.3361	30.181	35.876	37.17	27.9002	TMED7-TICAM2
ENSG00000213025	-0.118514	0.921136	0.86385	0.923986	4.85563	7.07352	18.3242	11.9587	6.34609	14.5081	COX20P1
ENSG00000178026	0.0271121	1.01897	0.863722	0.923964	342.808	427.442	299.654	359.68	326.371	364.935	LRRC75B
ENSG00000137411	-0.016319	0.988752	0.863716	0.923964	926.455	1041.83	944.233	999.928	935.596	1011.1	VARS2
ENSG00000178342	0.113743	1.08203	0.863679	0.923964	19.4225	10.105	4.31157	8.27908	9.97243	13.3921	KCNG2
ENSG00000177426	-0.0113157	0.992187	0.863575	0.923964	2737.61	2711.18	2785.27	2779.93	2732.45	2786.68	TGIF1
ENSG00000254859	-0.0751687	0.949231	0.863503	0.923964	38.8451	19.1995	16.1684	27.5969	26.291	24.5522	AC067930.4
ENSG00000261428	0.0442437	1.03114	0.8634	0.923912	60.2098	83.8717	75.4524	72.6719	57.1148	83.7007	AC097461.1
ENSG00000260051	-0.0692186	0.953154	0.863348	0.923912	43.7007	41.4306	17.2463	30.3566	41.7029	35.7123	AL031600.1
ENSG00000203805	-0.0415058	0.97164	0.863195	0.923809	201.023	237.468	406.365	283.328	292.827	292.394	PLPP4
ENSG00000095321	0.0140377	1.00978	0.863148	0.923809	2417.13	2595.98	2362.74	2449.69	2323.58	2533.34	CRAT
ENSG00000196656	-0.0739122	0.950058	0.863099	0.923809	22.3359	20.21	47.4272	37.7158	31.7305	24.5522	AC004057.1
ENSG00000103269	0.0366219	1.02571	0.862941	0.923713	80.6035	102.061	108.867	93.8295	88.8453	101.557	RHBDL1
ENSG00000251611	0.0955393	1.06846	0.86288	0.923706	14.5669	11.1155	9.70102	12.8786	8.15926	12.2761	FAM160A1-DT
ENSG00000226790	0.0796723	1.05678	0.862516	0.923375	13.5958	17.1785	19.402	16.5582	17.2251	13.3921	HNRNPA3P1
ENSG00000271576	-0.0442591	0.969788	0.86232	0.923223	64.0944	54.5671	71.1408	54.2739	67.0873	74.7726	AL359504.2
ENSG00000223891	0.0305101	1.02137	0.862182	0.923135	141.784	132.376	117.49	129.706	126.922	127.225	OSER1-AS1
ENSG00000127483	-0.0210029	0.985547	0.862072	0.923134	11037.8	10634.5	8179.04	9997.44	9931.64	10362.1	HP1BP3
ENSG00000133302	0.0198763	1.01387	0.862008	0.923124	482.65	446.642	409.599	446.15	438.787	436.36	SLF1
ENSG00000007952	-0.0898294	0.939634	0.861874	0.923039	12.6246	9.09452	19.402	13.7985	16.3185	13.3921	NOX1
ENSG00000036549	-0.0177315	0.987785	0.86178	0.922996	2311.28	2286.77	1898.17	2219.71	2229.29	2128.23	AC118549.1
ENSG00000134256	0.0695873	1.04942	0.861718	0.922988	29.1338	44.4621	22.6357	24.8372	26.291	41.2923	CD101
ENSG00000011198	-0.0219262	0.984917	0.861475	0.922787	368.057	344.581	418.222	392.796	388.925	364.935	ABHD5
ENSG00000089195	0.0246353	1.01722	0.861401	0.922766	749.71	717.457	988.426	804.91	844.937	762.234	TRMT6
ENSG00000261105	0.0983576	1.07055	0.861335	0.922754	10.6824	14.147	8.62313	9.19897	9.97243	12.2761	LMO7-AS1
ENSG00000176058	0.0197491	1.01378	0.861242	0.922713	1083.78	1158.04	1373.23	1224.38	1145.02	1195.25	TPRN
ENSG00000255108	0.0710528	1.05048	0.861112	0.922632	18.4514	25.2626	23.7136	17.478	25.3844	21.2042	AP006621.1
ENSG00000167232	0.0251908	1.01761	0.860768	0.92238	617.637	508.283	506.609	565.737	582.934	454.216	ZNF91
ENSG00000106692	-0.0231286	0.984096	0.860602	0.922261	2333.62	2348.41	1727.86	2293.3	2099.65	2121.53	FKTN
ENSG00000224728	-0.102155	0.93164	0.860416	0.92212	8.74014	8.08402	17.2463	9.19897	11.7856	15.6241	IMPDH1P8
ENSG00000072401	-0.0198231	0.986354	0.860253	0.922003	882.754	819.517	1019.69	907.019	964.606	886.111	UBE2D1
ENSG00000188693	0.104499	1.07512	0.860057	0.921852	7.76901	12.126	15.0905	12.8786	6.34609	13.3921	CYP51A1-AS1
ENSG00000145882	0.0240398	1.0168	0.860015	0.921852	719.605	667.942	529.245	655.887	595.626	635.009	PCYOX1L
ENSG00000165304	0.0124978	1.0087	0.859784	0.921676	3957.34	4023.82	3784.48	4003.39	3906.47	3753.14	MELK
ENSG00000234449	-0.0258047	0.982273	0.859777	0.921676	600.156	587.102	437.624	576.776	513.127	565.817	FAM239A
ENSG00000269680	0.0644644	1.0457	0.859659	0.921659	22.3359	40.4201	34.4925	32.1964	26.291	34.5963	AC008760.1
ENSG00000242951	-0.0630597	0.957232	0.859629	0.921659	32.0472	21.2205	31.2589	30.3566	29.9173	27.9002	AC007182.2
ENSG00000044090	0.0244658	1.0171	0.859136	0.921216	2076.27	2118.01	1511.2	1857.27	1792.32	1961.94	CUL7
ENSG00000159352	-0.0225401	0.984498	0.858992	0.921119	5467.44	5780.07	7536.62	6279.22	6383.26	6415.94	PSMD4
ENSG00000026652	-0.0167488	0.988458	0.858838	0.921012	1490.68	1477.35	1307.48	1392.72	1413.37	1522.24	AGPAT4
ENSG00000147408	-0.0518641	0.964689	0.858562	0.920775	57.2965	38.3991	61.4398	45.9949	58.928	58.0325	CSGALNACT1
ENSG00000136631	-0.0152102	0.989512	0.858497	0.920764	1049.79	998.376	1086.51	1079.04	1055.26	1032.31	VPS45
ENSG00000162244	-0.0206744	0.985772	0.85845	0.920764	12958.7	13593.3	17026.4	15106.6	14103.7	14995.8	RPL29
ENSG00000237276	-0.116756	0.922259	0.858383	0.920758	10.6824	13.1365	5.38946	11.0388	5.43951	15.6241	ANO7L1
ENSG00000275023	-0.0219817	0.984879	0.858327	0.920756	6911.51	7069.47	5276.28	6499.07	6237.3	6818.82	MLLT6
ENSG00000113108	-0.0257597	0.982303	0.858164	0.920641	455.458	437.547	338.458	440.631	398.897	415.155	APBB3
ENSG00000166439	-0.0415881	0.971585	0.858072	0.9206	837.111	867.011	417.144	752.476	720.735	710.898	RNF169
ENSG00000204842	0.0174147	1.01214	0.858066	0.9206	2109.29	2049.3	1801.16	2047.69	1840.37	2002.12	ATXN2
ENSG00000172403	0.0922489	1.06603	0.857935	0.92057	31.0761	15.1575	20.4799	31.2765	20.8515	10.0441	SYNPO2
ENSG00000165660	-0.0151714	0.989539	0.857934	0.92057	1111.94	1047.89	1018.61	1084.56	1068.86	1059.09	ABRAXAS2
ENSG00000174718	-0.0284045	0.980504	0.857879	0.92057	760.392	751.814	521.699	704.641	731.614	638.357	KIAA1551
ENSG00000233654	-0.0896031	0.939781	0.857773	0.92057	16.5092	12.126	17.2463	16.5582	21.758	10.0441	AC108047.1
ENSG00000116580	-0.0167435	0.988461	0.857663	0.920511	1783.96	1808.8	1601.75	1699.97	1683.53	1874.9	GON4L
ENSG00000134352	-0.0242193	0.983353	0.857595	0.920497	4629.36	4655.38	3320.98	4237.05	4376.99	4206.24	IL6ST
ENSG00000084072	-0.0180342	0.987577	0.857537	0.920493	712.807	681.079	763.147	686.243	747.026	751.074	PPIE
ENSG00000107130	-0.0136552	0.99058	0.857399	0.920404	6525	6617.78	7307.03	6837.6	6812.99	6992.91	NCS1
ENSG00000156502	0.0163476	1.0114	0.857351	0.920404	1141.07	1116.61	1274.07	1176.55	1162.24	1151.72	SUPV3L1
ENSG00000205609	-0.0621748	0.957819	0.857333	0.920404	28.1627	39.4096	35.5704	38.6357	42.6095	25.6682	EIF3CL
ENSG00000138867	-0.0114596	0.992088	0.857206	0.920372	3940.83	4099.61	3987.12	4048.47	3999.85	4075.67	GUCD1
ENSG00000108515	0.0370142	1.02599	0.857048	0.920261	144.698	153.596	126.113	124.186	170.438	118.297	ENO3
ENSG00000250846	-0.11082	0.926061	0.856849	0.920106	6.79789	10.105	12.9347	6.43928	14.5054	11.1601	EPHA5-AS1
ENSG00000100207	0.018071	1.0126	0.856743	0.920051	2239.42	2184.71	1847.51	2098.29	2101.46	1994.31	TCF20
ENSG00000105479	-0.106796	0.928648	0.856279	0.919611	13.5958	6.06301	10.7789	11.9587	11.7856	8.92808	CCDC114
ENSG00000232112	0.0254132	1.01777	0.856223	0.919608	3336.79	3375.08	4725.48	3700.75	3737.85	3797.78	TMA7
ENSG00000226314	0.105218	1.07566	0.855913	0.919334	20.3937	25.2626	7.54524	17.478	9.06585	23.4362	ZNF192P1
ENSG00000278771	-0.0692704	0.95312	0.85565	0.91911	51.4697	42.4411	43.1157	37.7158	75.2465	30.1323	RN7SL3
ENSG00000148690	-0.019238	0.986754	0.855538	0.919049	804.093	721.499	780.393	760.755	845.844	728.754	FRA10AC1
ENSG00000263235	-0.090749	0.939035	0.855162	0.918702	12.6246	16.168	14.0126	11.0388	19.9449	14.5081	AC006111.2
ENSG00000186615	0.0439699	1.03095	0.854804	0.918376	86.4303	88.9242	65.7514	71.752	70.7136	92.6288	KTN1-AS1
ENSG00000115446	0.0186363	1.013	0.854538	0.918148	996.376	1056.99	1167.36	1000.85	1116.01	1061.32	UNC50
ENSG00000224635	-0.092903	0.937634	0.854281	0.917931	17.4803	15.1575	9.70102	13.7985	19.0383	12.2761	AL391095.1
ENSG00000132109	-0.0241182	0.983422	0.854198	0.9179	463.227	431.484	556.192	466.388	493.182	515.596	TRIM21
ENSG00000040199	-0.0183907	0.987333	0.853792	0.917523	1011.91	1041.83	888.183	1028.45	987.271	964.232	PHLPP2
ENSG00000204356	0.0205187	1.01432	0.853746	0.917523	1641.2	1793.64	2080.33	1894.07	1710.73	1831.37	NELFE
ENSG00000164830	0.027727	1.0194	0.85362	0.917455	1546.03	1468.26	1046.63	1293.38	1414.27	1276.71	OXR1
ENSG00000227671	0.034827	1.02443	0.853529	0.917415	1091.55	960.988	618.71	831.587	851.283	926.288	AL390728.4
ENSG00000135002	0.0154118	1.01074	0.853426	0.917362	1540.21	1430.87	1510.13	1511.39	1518.53	1401.71	RFK
ENSG00000266235	-0.0761143	0.948609	0.853407	0.917362	25.2493	21.2205	16.1684	18.3979	24.4778	23.4362	MIR3176
ENSG00000236480	0.0631714	1.04476	0.853279	0.917322	35.9317	35.3676	31.2589	30.3566	41.7029	25.6682	PKMP1
ENSG00000130023	-0.0243738	0.983247	0.853205	0.9173	440.891	380.959	348.159	395.556	415.216	379.443	ERMARD
ENSG00000165887	0.0507047	1.03577	0.852948	0.917081	46.6141	55.5776	53.8946	42.3153	50.7688	58.0325	ANKRD2
ENSG00000227799	0.0633897	1.04492	0.852919	0.917081	36.9028	33.3466	28.0252	25.7571	37.17	31.2483	AC012358.2
ENSG00000105926	-0.0152407	0.989492	0.852917	0.917081	1479.03	1416.72	1373.23	1496.67	1428.78	1388.32	MPP6
ENSG00000260490	-0.102832	0.931203	0.85287	0.917081	10.6824	17.1785	7.54524	11.0388	12.6922	14.5081	MYL12BP1
ENSG00000101278	-0.10603	0.929141	0.852794	0.917081	13.5958	7.07352	15.0905	17.478	11.7856	8.92808	RPS10P5
ENSG00000172845	-0.0242526	0.98333	0.8527	0.917081	5065.4	5043.42	3690.7	4598.57	4864.73	4571.17	SP3
ENSG00000105649	-0.0470538	0.967911	0.852682	0.917081	79.6324	60.6301	60.3619	77.2714	58.0214	72.5406	RAB3A
ENSG00000013523	0.0213042	1.01488	0.852521	0.917031	443.805	457.758	396.664	414.874	439.694	425.2	ANGEL1
ENSG00000141564	-0.0183544	0.987358	0.852445	0.917008	2533.67	2903.17	2448.97	2780.85	2494.02	2713.02	RPTOR
ENSG00000268364	-0.0668822	0.954699	0.852432	0.917008	38.8451	23.2416	28.0252	34.0362	27.1975	33.4803	SMC5-AS1
ENSG00000179933	0.0255818	1.01789	0.852409	0.917008	776.901	871.053	1081.13	837.107	920.184	922.94	C14orf119
ENSG00000213385	0.0965694	1.06923	0.852398	0.917008	14.5669	15.1575	24.7915	11.9587	26.291	12.2761	AC105052.2
ENSG00000138641	0.0312815	1.02192	0.851703	0.916442	535.091	522.43	354.626	453.509	480.49	448.636	HERC3
ENSG00000164081	-0.0185105	0.987251	0.851693	0.916442	1078.92	1193.4	1298.86	1188.51	1227.52	1199.71	TEX264
ENSG00000174574	-0.0176005	0.987874	0.851636	0.916442	2634.67	2594.97	3087.08	2814.89	2827.64	2774.4	AKIRIN1
ENSG00000188185	0.0342247	1.02401	0.851601	0.916442	173.832	177.848	161.684	164.662	138.707	199.766	LINC00265
ENSG00000279660	-0.0944291	0.936643	0.851531	0.916442	13.5958	25.2626	10.7789	22.0775	16.3185	14.5081	AC005703.6
ENSG00000153936	-0.0182264	0.987446	0.851433	0.916442	3421.28	3274.03	2811.14	3164.45	3314.47	3149.38	HS2ST1
ENSG00000164663	0.0374888	1.02633	0.851354	0.916417	471.968	493.125	284.563	418.553	381.672	418.504	USP49
ENSG00000213590	0.0896443	1.06411	0.851025	0.916127	18.4514	13.1365	20.4799	11.0388	19.0383	18.9722	AL807752.1
ENSG00000233328	-0.0503296	0.965716	0.850928	0.916127	59.2387	84.8822	112.101	95.6693	79.7795	89.2808	PFN1P1
ENSG00000141458	-0.0244664	0.983184	0.850801	0.916056	7225.18	7492.87	5353.89	6913.03	6754.96	6748.51	NPC1
ENSG00000283050	0.0451163	1.03177	0.850685	0.915988	157.323	150.565	91.6208	117.747	122.389	148.429	GTF2IP12
ENSG00000147485	0.0676175	1.04798	0.850473	0.915819	35.9317	36.3781	75.4524	52.4341	44.4227	43.5244	PXDNL
ENSG00000267575	0.0271519	1.019	0.85012	0.915497	240.839	223.321	216.656	220.775	206.701	242.174	AC006504.5
ENSG00000172650	-0.07712	0.947948	0.849994	0.91542	37.8739	18.189	25.8694	24.8372	25.3844	36.8283	AGAP5
ENSG00000227542	0.0733504	1.05216	0.849821	0.915292	29.1338	27.2836	34.4925	39.5556	27.1975	18.9722	AC092614.1
ENSG00000213757	0.0832595	1.05941	0.849781	0.915292	15.538	23.2416	28.0252	27.5969	17.2251	17.8562	AC020898.1
ENSG00000251034	0.0966783	1.06931	0.84967	0.915246	14.5669	23.2416	9.70102	15.6383	15.4119	13.3921	AC037459.2
ENSG00000136144	0.0184519	1.01287	0.84965	0.915246	844.88	853.874	750.212	824.228	799.608	794.599	RCBTB1
ENSG00000112592	0.0199717	1.01394	0.849643	0.915246	709.894	648.742	762.069	718.44	706.23	665.142	TBP
ENSG00000260219	-0.0607994	0.958733	0.84943	0.915162	54.3831	48.5041	35.5704	47.8347	36.2634	61.3805	AC106782.2
ENSG00000143614	0.0207006	1.01445	0.849395	0.915162	1670.34	1692.59	1381.86	1652.14	1532.13	1493.22	GATAD2B
ENSG00000163666	0.107786	1.07757	0.849391	0.915162	20.3937	13.1365	10.7789	9.19897	21.758	10.0441	HESX1
ENSG00000172382	-0.0815946	0.945013	0.849232	0.915124	24.2782	16.168	19.402	15.6383	24.4778	23.4362	PRSS27
ENSG00000100116	0.0276368	1.01934	0.849124	0.915066	380.682	403.19	500.142	433.272	379.859	446.404	GCAT
ENSG00000157429	-0.054234	0.963106	0.849029	0.915021	65.0655	65.6826	61.4398	48.7546	61.6478	90.3968	ZNF19
ENSG00000217241	-0.074573	0.949623	0.848937	0.914981	22.3359	39.4096	59.284	45.075	48.049	33.4803	CBX3P9
ENSG00000147162	0.0349038	1.02449	0.848704	0.914789	7460.19	6957.31	4241.5	5869.86	5983.46	6361.25	OGT
ENSG00000168228	-0.0228311	0.984299	0.848633	0.91477	572.965	569.923	467.805	540.9	535.792	561.353	ZCCHC4
ENSG00000130414	-0.0156085	0.989239	0.848458	0.91464	2934.74	3106.28	3369.49	3196.64	3138.6	3176.16	NDUFA10
ENSG00000146859	0.0325964	1.02285	0.848409	0.91464	934.224	919.557	604.697	813.189	736.147	855.979	TMEM140
ENSG00000198948	0.0311319	1.02181	0.847917	0.914173	294.251	316.287	223.124	265.85	265.629	285.698	MFAP3L
ENSG00000145040	-0.034263	0.97653	0.847881	0.914173	412.729	445.632	648.891	476.507	519.473	546.845	UCN2
ENSG00000259845	0.103968	1.07473	0.847837	0.914173	17.4803	20.21	8.62313	16.5582	9.06585	17.8562	HERC2P10
ENSG00000242299	0.0352528	1.02474	0.847631	0.91404	123.333	138.439	161.684	146.264	139.614	126.109	AC073861.1
ENSG00000147679	-0.0196804	0.986451	0.847534	0.913994	1206.14	1106.5	1256.82	1233.58	1282.82	1099.27	UTP23
ENSG00000215817	-0.0908232	0.938987	0.847494	0.913994	14.5669	18.189	11.8568	14.7184	17.2251	15.6241	ZC3H11B
ENSG00000171806	-0.0342126	0.976565	0.847319	0.913879	169.947	169.764	210.189	160.062	208.515	194.186	METTL18
ENSG00000181061	-0.0253699	0.982569	0.847172	0.913778	1600.42	1698.65	2142.85	1872.91	1980.89	1681.83	HIGD1A
ENSG00000173175	0.109158	1.0786	0.847142	0.913778	9.71127	12.126	24.7915	14.7184	19.0383	8.92808	ADCY5
ENSG00000231006	-0.0796125	0.946312	0.847117	0.913778	21.3648	16.168	32.3367	23.9173	27.1975	22.3202	RPL7P32
ENSG00000115966	-0.0202544	0.986059	0.846966	0.913731	2676.42	2534.34	2123.45	2497.52	2503.08	2438.48	ATF2
ENSG00000153904	-0.0153197	0.989437	0.846864	0.913679	1495.53	1545.06	1607.14	1607.06	1514	1575.81	DDAH1
ENSG00000123136	-0.0275295	0.981099	0.846827	0.913679	5141.14	5295.03	7419.13	6111.8	5909.12	6177.11	DDX39A
ENSG00000280434	0.0801787	1.05715	0.846592	0.913502	27.1915	18.189	24.7915	21.1576	28.1041	16.7401	AL031595.3
ENSG00000159788	0.0158117	1.01102	0.846532	0.913496	2034.51	2050.31	1844.27	1967.66	1911.08	1987.61	RGS12
ENSG00000261490	-0.05673	0.961441	0.846508	0.913496	46.6141	42.4411	39.882	43.2352	38.0766	53.5685	AC005674.2
ENSG00000255389	0.0804138	1.05732	0.846488	0.913496	19.4225	27.2836	24.7915	30.3566	19.0383	17.8562	Z97989.1
ENSG00000218426	0.0343873	1.02412	0.84639	0.913496	168.976	165.722	209.111	153.623	181.317	196.418	AL590867.2
ENSG00000247572	-0.0403288	0.972433	0.846158	0.913325	85.4591	93.9767	80.8419	93.8295	81.5926	92.6288	CKMT2-AS1
ENSG00000059728	0.0385853	1.02711	0.846068	0.913286	345.721	339.529	211.267	307.246	266.536	300.207	MXD1
ENSG00000233971	-0.116216	0.922604	0.845894	0.913157	7.76901	14.147	17.2463	8.27908	22.6646	11.1601	RPS20P10
ENSG00000271833	0.0788385	1.05617	0.845733	0.913042	21.3648	21.2205	25.8694	16.5582	21.758	26.7842	AL445222.1
ENSG00000178386	0.0967058	1.06933	0.845416	0.912757	20.3937	15.1575	10.7789	16.5582	14.5054	12.2761	ZNF223
ENSG00000137876	0.0179933	1.01255	0.845257	0.912644	3411.57	3415.5	3775.85	3427.54	3778.65	3262.1	RSL24D1
ENSG00000197728	-0.0332401	0.977223	0.845146	0.912583	3844.69	3960.16	6163.38	4720.91	4823.94	4747.5	RPS26
ENSG00000198431	-0.0132391	0.990865	0.845073	0.912562	16852	17006.8	15736.1	16872.8	16943.2	16235.7	TXNRD1
ENSG00000259985	-0.0980246	0.934311	0.845057	0.912562	18.4514	17.1785	8.62313	13.7985	18.1317	15.6241	AC017100.1
ENSG00000226284	0.0990137	1.07104	0.84504	0.912562	13.5958	26.2731	12.9347	13.7985	13.5988	22.3202	ARPC3P1
ENSG00000241697	-0.0707713	0.952129	0.845026	0.912562	38.8451	52.5461	36.6483	47.8347	27.1975	60.2645	TMEFF1
ENSG00000243824	-0.110335	0.926373	0.84488	0.912562	12.6246	9.09452	16.1684	10.1189	9.97243	21.2042	RPL12P6
ENSG00000123009	-0.0870711	0.941432	0.844732	0.912485	23.307	12.126	31.2589	24.8372	24.4778	21.2042	NME2P1
ENSG00000137944	-0.0220235	0.98485	0.844679	0.912485	677.846	797.286	648.891	723.959	725.268	707.55	KYAT3
ENSG00000228331	-0.0961903	0.9355	0.844565	0.912422	21.3648	15.1575	12.9347	11.0388	19.9449	22.3202	RPL17P43
ENSG00000168438	-0.018265	0.987419	0.844411	0.912314	941.022	975.135	855.846	943.815	941.035	922.94	CDC40
ENSG00000181690	0.0736979	1.05241	0.844231	0.912177	24.2782	26.2731	26.9473	21.1576	29.9173	22.3202	PLAG1
ENSG00000237476	0.0707875	1.05029	0.843775	0.911743	35.9317	31.3256	23.7136	31.2765	31.7305	23.4362	LINC01637
ENSG00000206053	-0.0116161	0.991981	0.843699	0.911719	16067.3	16314.6	16571.5	16820.3	16285.9	16241.3	JPT2
ENSG00000111725	0.0201394	1.01406	0.843643	0.911717	848.765	781.118	893.572	884.021	810.487	792.367	PRKAB1
ENSG00000128872	0.0539906	1.03813	0.843581	0.911708	174.803	184.922	88.3871	138.904	128.735	165.169	TMOD2
ENSG00000235001	-0.0840393	0.943413	0.843209	0.911365	15.538	27.2836	34.4925	21.1576	26.291	34.5963	EIF4A1P2
ENSG00000069667	0.0935832	1.06702	0.843189	0.911365	18.4514	15.1575	12.9347	13.7985	15.4119	14.5081	RORA
ENSG00000149639	-0.0259679	0.982161	0.842971	0.911223	6827.99	6977.52	5015.43	6602.1	6236.4	6325.54	SOGA1
ENSG00000163536	0.0644637	1.0457	0.842766	0.91106	36.9028	41.4306	32.3367	28.5168	41.7029	35.7123	SERPINI1
ENSG00000152380	-0.0962799	0.935442	0.842691	0.911038	22.3359	9.09452	20.4799	20.2377	16.3185	18.9722	FAM151B
ENSG00000197329	-0.0283855	0.980517	0.842645	0.911038	861.389	815.475	628.411	822.388	823.179	705.318	PELI1
ENSG00000178229	0.0426693	1.03002	0.84262	0.911038	126.246	148.544	109.945	112.227	151.4	109.369	ZNF543
ENSG00000272476	-0.0691942	0.95317	0.842603	0.911038	24.2782	29.3046	34.4925	34.9561	28.1041	29.0162	AL024507.2
ENSG00000104518	0.0166747	1.01163	0.842192	0.910731	2599.71	2614.17	2812.22	2549.96	2561.1	2824.62	GSDMD
ENSG00000250995	-0.0992084	0.933545	0.842057	0.910644	12.6246	29.3046	12.9347	15.6383	19.9449	23.4362	AL391280.1
ENSG00000157911	-0.0178375	0.987712	0.841981	0.91062	851.678	891.263	859.079	914.378	838.591	881.647	PEX10
ENSG00000108176	-0.0465071	0.968278	0.841646	0.910316	64.0944	74.7772	89.465	82.7908	80.6861	71.4246	DNAJC12
ENSG00000100027	0.0773891	1.05511	0.841569	0.910291	72.8345	69.7247	24.7915	58.8734	49.8622	50.2204	YPEL1
ENSG00000145685	0.0264704	1.01852	0.841503	0.910277	1617.9	1778.48	1261.13	1533.47	1489.52	1551.25	LHFPL2
ENSG00000109814	-0.0142749	0.990154	0.841345	0.910164	3653.38	3567.07	3679.92	3531.49	3839.39	3637.07	UGDH
ENSG00000178537	-0.0275873	0.98106	0.841319	0.910164	283.569	302.14	358.938	318.284	331.81	311.367	SLC25A20
ENSG00000172840	-0.0234825	0.983855	0.841113	0.91003	764.277	680.068	601.463	677.964	699.884	703.086	PDP2
ENSG00000196118	-0.0380689	0.973958	0.84111	0.91003	116.535	126.313	130.425	141.664	107.884	133.921	CCDC189
ENSG00000162755	-0.0583823	0.96034	0.841078	0.91003	39.8162	47.4936	43.1157	48.7546	37.17	50.2204	KLHDC9
ENSG00000013392	0.0262814	1.01838	0.840923	0.91	331.154	290.014	286.719	281.489	300.986	310.251	RWDD2A
ENSG00000122126	-0.0249093	0.982882	0.840917	0.91	1953.91	1869.43	1455.15	1780.92	1737.92	1853.69	OCRL
ENSG00000260643	-0.118346	0.921243	0.840747	0.909925	9.71127	8.08402	14.0126	13.7985	13.5988	6.69606	AC092718.3
ENSG00000158615	-0.0184985	0.98726	0.840516	0.909744	3393.12	3365.98	2923.24	3202.16	3435.96	3169.47	PPP1R15B
ENSG00000171202	0.0282303	1.01976	0.840468	0.909744	574.907	593.165	780.393	653.127	646.395	609.341	TMEM126A
ENSG00000067248	-0.02026	0.986055	0.840444	0.909744	923.541	866	1017.53	964.052	975.485	905.084	DHX29
ENSG00000125995	0.0292939	1.02051	0.840325	0.909744	2015.09	2254.43	2996.54	2291.46	2457.75	2369.29	ROMO1
ENSG00000152242	0.0215287	1.01503	0.840099	0.909574	1526.61	1491.5	1243.89	1377.09	1458.7	1363.76	C18orf25
ENSG00000119844	-0.0160066	0.988966	0.839998	0.909523	1259.55	1287.38	1205.08	1258.42	1256.53	1280.06	AFTPH
ENSG00000270344	-0.0635715	0.956892	0.839995	0.909523	35.9317	35.3676	35.5704	35.876	31.7305	44.6404	POC1B-AS1
ENSG00000092871	0.0231035	1.01614	0.839973	0.909523	932.282	910.463	748.057	861.944	822.273	867.139	RFFL
ENSG00000148468	0.0143732	1.01001	0.839595	0.909261	3644.64	3819.7	3811.42	3869.09	3600.05	3693.99	FAM171A1
ENSG00000196417	-0.0273797	0.981201	0.839524	0.909242	426.325	425.421	333.068	395.556	407.963	405.111	ZNF765
ENSG00000141556	0.0166473	1.01161	0.838802	0.908519	4924.58	5419.32	5684.8	5326.21	5167.53	5350.15	TBCD
ENSG00000261098	0.0663267	1.04705	0.838656	0.908419	40.7873	33.3466	45.2714	33.1163	48.049	32.3643	AP000766.1
ENSG00000118292	0.101824	1.07313	0.838457	0.908261	14.5669	20.21	10.7789	13.7985	16.3185	12.2761	C1orf54
ENSG00000136319	-0.0269303	0.981507	0.838381	0.908237	286.482	292.035	272.707	262.171	298.266	308.019	TTC5
ENSG00000160714	-0.0244837	0.983172	0.838205	0.908105	1616.93	1727.96	2143.93	1835.2	1906.55	1839.18	UBE2Q1
ENSG00000253741	-0.0806434	0.945636	0.838054	0.907999	18.4514	26.2731	20.4799	22.0775	24.4778	22.3202	AC108002.1
ENSG00000108061	-0.0177656	0.987761	0.837978	0.907975	3096.92	3015.34	2791.74	3031.06	3173.95	2807.88	SHOC2
ENSG00000213326	0.0589062	1.04168	0.837966	0.907975	57.2965	47.4936	64.6735	66.2326	41.7029	54.6845	RPS7P11
ENSG00000219023	0.0710042	1.05045	0.837927	0.907975	37.8739	33.3466	57.1282	45.9949	46.2358	29.0162	AL033519.2
ENSG00000226754	-0.0841771	0.943322	0.837809	0.907966	27.1915	31.3256	35.5704	40.4755	17.2251	42.4084	AL606760.1
ENSG00000256073	-0.0453525	0.969053	0.837765	0.907966	68.95	71.7457	79.764	80.951	72.5268	73.6566	URB1-AS1
ENSG00000279233	-0.067799	0.954092	0.837657	0.907918	31.0761	33.3466	53.8946	37.7158	43.5161	42.4084	AC122688.3
ENSG00000048707	0.037523	1.02635	0.837535	0.907844	2371.49	2447.44	1428.21	2108.4	1962.76	2016.63	VPS13D
ENSG00000215492	-0.0658563	0.955378	0.837261	0.907606	33.0183	33.3466	50.6609	37.7158	38.9832	45.7564	HNRNPA1P7
ENSG00000171462	-0.0621442	0.957839	0.837154	0.907547	40.7873	36.3781	37.7262	37.7158	46.2358	35.7123	DLK2
ENSG00000231648	-0.0905529	0.939163	0.83715	0.907547	20.3937	15.1575	22.6357	22.0775	14.5054	25.6682	LINC01698
ENSG00000074054	0.0286115	1.02003	0.836768	0.907246	4103.98	3868.2	2833.78	3598.64	3388.81	3608.06	CLASP1
ENSG00000100029	0.0268772	1.0188	0.836426	0.906933	4895.45	5263.71	6872.64	5592.98	5542.86	5580.05	PES1
ENSG00000258674	0.061309	1.04341	0.836326	0.906883	49.5275	52.5461	74.3745	59.7933	42.6095	66.9606	AC011448.1
ENSG00000162642	0.0204688	1.01429	0.835932	0.906513	799.237	753.835	877.404	808.59	799.608	786.787	C1orf52
ENSG00000247516	0.0397492	1.02794	0.835913	0.906513	118.477	126.313	115.334	103.948	111.51	136.153	MIR4458HG
ENSG00000010256	-0.0221987	0.984731	0.835791	0.906477	5051.8	5332.42	6446.87	5819.27	5607.23	5663.75	UQCRC1
ENSG00000101146	-0.0236763	0.983723	0.835788	0.906477	1505.25	1497.56	1880.92	1702.73	1591.06	1669.55	RAE1
ENSG00000229951	-0.0803739	0.945813	0.835646	0.906437	22.3359	22.2311	23.7136	27.5969	19.0383	25.6682	AC104695.2
ENSG00000242071	-0.0372476	0.974512	0.835589	0.906432	177.716	176.838	250.071	204.217	206.701	208.694	RPL7AP6
ENSG00000028277	0.0983642	1.07056	0.835539	0.906432	15.538	18.189	24.7915	18.3979	24.4778	11.1601	POU2F2
ENSG00000260806	0.121402	1.08779	0.835523	0.906432	22.3359	8.08402	9.70102	10.1189	13.5988	13.3921	AL163051.1
ENSG00000232341	-0.0949335	0.936315	0.83548	0.906432	13.5958	16.168	18.3242	20.2377	16.3185	14.5081	RPL4P2
ENSG00000168152	-0.0394884	0.973	0.835307	0.906359	151.496	177.848	135.814	144.424	147.773	187.49	THAP9
ENSG00000225536	0.114119	1.08231	0.835196	0.906297	12.6246	8.08402	22.6357	12.8786	13.5988	13.3921	STIP1P3
ENSG00000083844	0.0222147	1.01552	0.835087	0.906236	707.951	687.142	598.23	652.207	666.34	645.053	ZNF264
ENSG00000278376	-0.120244	0.920032	0.834833	0.906019	10.6824	7.07352	11.8568	11.9587	9.06585	11.1601	AP004609.3
ENSG00000205238	-0.0584823	0.960274	0.834717	0.905952	56.3253	51.5356	42.0378	52.4341	59.8346	43.5244	SPDYE2
ENSG00000078140	-0.0143758	0.990085	0.834639	0.905925	6659.99	6475.3	6323.99	6657.3	6728.67	6266.39	UBE2K
ENSG00000213542	-0.13289	0.912003	0.834607	0.905925	18.4514	7.07352	14.0126	14.7184	22.6646	5.58005	AC007000.1
ENSG00000100403	-0.0149976	0.989658	0.834433	0.905818	7340.75	7726.3	7022.46	7526.6	7224.58	7571.01	ZC3H7B
ENSG00000162814	-0.0663609	0.955044	0.834344	0.90578	40.7873	56.5881	44.1935	55.1938	34.4502	59.1485	SPATA17
ENSG00000162004	0.0317687	1.02226	0.834122	0.905597	211.706	206.142	242.526	210.656	199.449	236.594	CCDC78
ENSG00000158715	-0.0262962	0.981938	0.834071	0.905597	291.338	339.529	336.302	326.564	325.464	332.571	SLC45A3
ENSG00000163322	-0.0311038	0.978671	0.834048	0.905597	391.364	421.379	328.757	418.553	409.776	337.035	ABRAXAS1
ENSG00000214297	0.11438	1.08251	0.833399	0.904987	16.5092	8.08402	16.1684	15.6383	11.7856	10.0441	ALDOAP2
ENSG00000031823	0.020333	1.01419	0.833376	0.904987	2959.02	3037.57	3503.15	3054.98	3009.86	3302.27	RANBP3
ENSG00000279519	-0.0402174	0.972508	0.833359	0.904987	189.37	163.701	125.035	159.142	164.998	168.517	AC007382.1
ENSG00000115325	0.032393	1.02271	0.833289	0.904987	741.941	738.677	1062.8	813.189	826.805	845.935	DOK1
ENSG00000142684	0.0600123	1.04247	0.833226	0.904987	45.6429	44.4621	63.5956	53.354	49.8622	43.5244	ZNF593
ENSG00000226784	-0.0711493	0.951879	0.833203	0.904987	27.1915	28.2941	32.3367	29.4367	33.5436	29.0162	PGAM4
ENSG00000100664	-0.0209559	0.985579	0.833121	0.904987	5806.37	5756.83	6898.5	6389.61	6452.16	5886.95	EIF5
ENSG00000196569	0.0729368	1.05186	0.833071	0.904987	34.9606	30.3151	34.4925	22.9974	35.3568	36.8283	LAMA2
ENSG00000249784	0.125433	1.09084	0.832831	0.904835	19.4225	10.105	7.54524	13.7985	8.15926	12.2761	SCARNA22
ENSG00000089775	0.0419154	1.02948	0.832519	0.904554	424.382	360.749	245.759	306.326	359.008	337.035	ZBTB25
ENSG00000124614	-0.0288651	0.980191	0.832371	0.904451	4100.1	4454.29	5907.92	4959.17	4885.59	4908.21	RPS10
ENSG00000223374	0.104174	1.07488	0.832344	0.904451	25.2493	27.2836	18.3242	11.0388	19.9449	35.7123	AC005104.1
ENSG00000243433	0.112868	1.08138	0.832272	0.904451	22.3359	11.1155	12.9347	9.19897	17.2251	16.7401	AC010973.1
ENSG00000183431	0.0205609	1.01435	0.832187	0.904426	4854.66	4767.55	5785.04	5019.88	5122.2	5045.48	SF3A3
ENSG00000213057	0.112568	1.08115	0.832061	0.904347	10.6824	11.1155	17.2463	10.1189	13.5988	12.2761	C1orf220
ENSG00000233927	0.0280934	1.01966	0.832056	0.904347	7872.92	8120.4	10965.4	9008.55	8584.45	8844.37	RPS28
ENSG00000245534	0.114681	1.08274	0.831758	0.904133	16.5092	19.1995	7.54524	11.0388	13.5988	15.6241	RORA-AS1
ENSG00000171824	0.0175967	1.01227	0.831666	0.904091	4194.3	4105.67	4671.58	4396.19	4140.37	4276.55	EXOSC10
ENSG00000272686	-0.0404985	0.972319	0.831613	0.904091	106.824	105.092	102.4	108.548	116.949	97.0928	AC006333.2
ENSG00000110435	-0.0166194	0.988546	0.831456	0.903979	1407.16	1419.76	1414.19	1433.2	1481.36	1373.81	PDHX
ENSG00000037637	-0.0195542	0.986538	0.831439	0.903979	1049.79	1008.48	969.024	977.851	1005.4	1088.11	FBXO42
ENSG00000183647	-0.0353697	0.975782	0.831342	0.903972	170.918	143.491	160.606	160.062	151.4	176.329	ZNF530
ENSG00000168434	0.018683	1.01303	0.831207	0.903883	804.093	832.654	807.341	793.871	789.635	830.311	COG7
ENSG00000166352	0.0359969	1.02527	0.831165	0.903883	193.254	219.279	263.006	236.414	197.636	224.318	C11orf74
ENSG00000274051	0.128395	1.09308	0.831104	0.903883	17.4803	14.147	8.62313	6.43928	10.879	20.0882	RF02271
ENSG00000233668	0.116073	1.08378	0.831038	0.903874	7.76901	15.1575	18.3242	14.7184	10.879	12.2761	AL353662.2
ENSG00000180447	-0.128366	0.914867	0.831021	0.903874	6.79789	9.09452	14.0126	10.1189	8.15926	14.5081	GAS1
ENSG00000010626	-0.0340556	0.976671	0.831	0.903874	270.944	291.025	252.227	241.013	265.629	329.223	LRRC23
ENSG00000223877	-0.102882	0.931171	0.830904	0.903874	12.6246	21.2205	25.8694	24.8372	26.291	12.2761	RPS8P10
ENSG00000214439	-0.108441	0.92759	0.830845	0.903874	18.4514	20.21	9.70102	23.9173	12.6922	15.6241	FAM185BP
ENSG00000121281	-0.0374944	0.974346	0.830743	0.903844	1132.33	1266.16	756.68	1083.64	1024.44	1131.63	ADCY7
ENSG00000273162	-0.0662244	0.955134	0.83044	0.903572	51.4697	40.4201	51.7388	42.3153	66.1807	41.2923	AL133215.2
ENSG00000163840	-0.0216649	0.985095	0.830188	0.903356	2471.52	2323.14	1999.49	2333.78	2233.83	2331.34	DTX3L
ENSG00000177051	0.0251753	1.0176	0.830075	0.903292	514.697	518.388	588.529	501.344	514.034	579.209	FBXO46
ENSG00000166266	-0.0272213	0.981309	0.830044	0.903292	2220	2040.2	1624.38	1979.62	2106	1911.72	CUL5
ENSG00000132356	-0.0258608	0.982234	0.829945	0.903267	5987	5882.13	4510.98	5515.7	5766.79	5394.79	PRKAA1
ENSG00000196459	-0.0244857	0.983171	0.829942	0.903267	570.051	485.041	565.893	574.936	543.951	528.988	TRAPPC2
ENSG00000126562	-0.0545173	0.962917	0.82982	0.903247	84.488	72.7562	64.6735	87.3902	84.3124	58.0325	WNK4
ENSG00000282988	0.11512	1.08307	0.829549	0.903011	13.5958	12.126	19.402	8.27908	13.5988	20.0882	AL031777.3
ENSG00000235605	-0.0494208	0.966324	0.829201	0.902689	68.95	68.7142	74.3745	82.7908	67.0873	69.1926	AL355472.2
ENSG00000074266	-0.0242167	0.983354	0.829193	0.902689	846.822	921.578	1056.33	912.538	994.524	964.232	EED
ENSG00000251192	0.0383069	1.02691	0.829094	0.902689	135.958	134.397	114.256	125.106	126.922	122.761	ZNF674
ENSG00000242028	-0.038948	0.973364	0.829022	0.902669	215.59	166.733	151.983	182.14	174.971	193.07	HYPK
ENSG00000259315	0.114394	1.08252	0.828875	0.902568	17.4803	17.1785	8.62313	14.7184	9.97243	15.6241	ACTG1P17
ENSG00000274911	-0.0989009	0.933744	0.828721	0.902458	14.5669	15.1575	25.8694	15.6383	23.5712	20.0882	AL627230.2
ENSG00000100281	-0.018351	0.987361	0.82862	0.902405	1715.01	1794.65	1694.45	1779.08	1847.62	1641.65	HMGXB4
ENSG00000080802	-0.0208972	0.98562	0.828508	0.902342	1171.18	1232.81	1048.79	1205.07	1140.48	1158.42	CNOT4
ENSG00000282886	-0.115634	0.922976	0.828426	0.902311	14.5669	9.09452	15.0905	9.19897	17.2251	15.6241	AL691447.3
ENSG00000226715	-0.0863179	0.941924	0.828425	0.902311	23.307	19.1995	21.5578	26.677	19.0383	22.3202	LINC01709
ENSG00000103642	0.0225254	1.01574	0.828417	0.902311	1451.83	1456.13	1695.52	1563.83	1570.21	1395.01	LACTB
ENSG00000268279	-0.114685	0.923584	0.82838	0.902311	8.74014	19.1995	17.2463	20.2377	18.1317	10.0441	AC090004.1
ENSG00000128626	0.0372045	1.02612	0.828229	0.902311	1346.95	1341.95	2102.97	1544.51	1588.34	1535.63	MRPS12
ENSG00000244187	0.0132824	1.00925	0.828087	0.902232	8640.11	8762.07	8996.08	8692.11	8578.11	8886.78	TMEM141
ENSG00000281005	0.107974	1.07771	0.828056	0.902232	18.4514	20.21	10.7789	17.478	10.879	17.8562	LINC00921
ENSG00000181610	-0.0324418	0.977764	0.827995	0.902232	1634.41	1733.01	2423.1	1996.18	1993.58	1930.7	MRPS23
ENSG00000213741	-0.0304111	0.979141	0.827955	0.902232	3106.63	3208.34	4417.2	3653.83	3775.02	3529.94	RPS29
ENSG00000229956	0.0850424	1.06072	0.827895	0.902232	33.0183	24.2521	25.8694	34.9561	19.9449	23.4362	ZRANB2-AS2
ENSG00000264522	0.0213379	1.0149	0.827798	0.902208	1858.74	1838.1	1556.48	1701.81	1709.82	1766.64	OTUD7B
ENSG00000124613	0.0436091	1.03069	0.827773	0.902208	155.38	134.397	106.711	134.305	133.268	117.181	ZNF391
ENSG00000177888	0.0450607	1.03173	0.827254	0.901732	1584.88	1456.13	826.743	1219.78	1314.55	1215.33	ZBTB41
ENSG00000149273	0.0263925	1.01846	0.827235	0.901732	21435.7	22720.1	29060	23979.9	23792.4	24114.7	RPS3
ENSG00000143093	-0.0205982	0.985824	0.826998	0.901568	1209.05	1238.88	1110.23	1266.7	1129.6	1214.22	STRIP1
ENSG00000176463	-0.0187559	0.987084	0.82698	0.901568	1076.98	1136.82	1173.82	1152.63	1103.31	1176.27	SLCO3A1
ENSG00000268996	-0.0432887	0.97044	0.826835	0.901508	92.257	92.9662	95.9323	97.5091	103.351	88.1647	MAN1B1-AS1
ENSG00000172986	-0.0255329	0.982458	0.826651	0.901365	1035.22	1050.92	828.898	1006.37	991.804	969.812	GXYLT2
ENSG00000176692	0.0388386	1.02729	0.826083	0.900803	231.128	247.573	324.445	269.53	226.646	285.698	FOXC2
ENSG00000167766	0.0331632	1.02325	0.826075	0.900803	2206.4	1924	1461.62	1680.65	1836.74	1949.67	ZNF83
ENSG00000229167	0.102857	1.0739	0.825972	0.900799	19.4225	23.2416	12.9347	20.2377	19.0383	12.2761	AC114488.1
ENSG00000087502	-0.0190429	0.986887	0.825972	0.900799	2231.65	2197.84	2465.14	2395.41	2382.51	2205.23	ERGIC2
ENSG00000134013	0.0283486	1.01984	0.825643	0.900556	26404.9	27864.6	20068.2	24654.2	22915.7	25323.4	LOXL2
ENSG00000133835	-0.0154254	0.989365	0.825477	0.900433	3442.64	3481.18	3273.56	3438.58	3517.55	3350.26	HSD17B4
ENSG00000140987	0.0476657	1.03359	0.825246	0.90024	95.1704	98.0187	77.6082	95.6693	87.9387	78.1207	ZSCAN32
ENSG00000171940	0.0350769	1.02461	0.825203	0.90024	4117.58	4224.91	2716.29	3593.12	3493.07	3708.5	ZNF217
ENSG00000148356	0.0194257	1.01356	0.824958	0.900041	1207.11	1158.04	1092.98	1098.36	1135.04	1180.74	LRSAM1
ENSG00000218891	-0.0249121	0.98288	0.824915	0.900041	655.51	732.614	815.964	729.479	743.4	768.93	ZNF579
ENSG00000160226	-0.0308551	0.97884	0.824841	0.90003	825.458	912.484	1161.97	1017.41	931.969	1012.22	C21orf2
ENSG00000089006	0.015979	1.01114	0.824798	0.90003	3757.29	3711.57	4056.11	3771.58	3828.51	3796.66	SNX5
ENSG00000073169	-0.0244899	0.983168	0.824713	0.900006	893.436	902.379	1090.83	954.853	972.766	1007.76	SELENOO
ENSG00000281649	-0.0316033	0.978332	0.82464	0.899984	2913.38	2888.02	2024.28	2631.83	2619.12	2749.85	EBLN3P
ENSG00000066422	0.0289916	1.0203	0.824448	0.899834	1379.97	1270.2	1001.36	1240.94	1190.35	1148.37	ZBTB11
ENSG00000125703	-0.0257313	0.982323	0.824272	0.899699	511.784	535.566	560.504	588.734	556.643	488.812	ATG4C
ENSG00000260276	0.0523745	1.03697	0.823899	0.89935	90.3148	64.6721	89.465	83.7107	70.7136	81.4687	AC022167.2
ENSG00000112031	0.0241154	1.01686	0.823816	0.899317	677.846	675.016	594.996	630.13	679.032	605.993	MTRF1L
ENSG00000234753	0.118823	1.08585	0.823806	0.899317	8.74014	13.1365	20.4799	12.8786	13.5988	12.2761	FOXP4-AS1
ENSG00000185607	0.0783024	1.05578	0.82369	0.899296	26.2204	30.3151	35.5704	26.677	34.4502	25.6682	ACTBP7
ENSG00000273084	-0.135558	0.910318	0.823684	0.899296	15.538	9.09452	7.54524	17.478	9.97243	7.81207	AC092171.5
ENSG00000214226	-0.0502352	0.965779	0.823522	0.89923	81.5746	91.9557	77.6082	91.0698	71.6202	98.2088	C17orf67
ENSG00000254999	0.0202849	1.01416	0.82341	0.899165	3770.88	3843.95	4450.61	3928.88	3912.82	4054.46	BRK1
ENSG00000115657	-0.0328571	0.977483	0.823302	0.899105	222.388	206.142	191.865	197.778	214.861	223.202	ABCB6
ENSG00000260025	-0.0556084	0.962189	0.823292	0.899105	61.181	52.5461	74.3745	63.4729	67.9939	63.6125	AC009414.2
ENSG00000141933	0.0333253	1.02337	0.823272	0.899105	369.999	391.064	490.441	401.075	373.513	448.636	TPGS1
ENSG00000146834	-0.0236102	0.983768	0.823198	0.899105	3118.29	3288.17	3911.67	3526.89	3357.08	3603.59	MEPCE
ENSG00000264070	0.0972672	1.06975	0.822995	0.899002	17.4803	34.3571	38.8041	23.9173	38.9832	21.2042	DND1P1
ENSG00000170421	0.032765	1.02297	0.822806	0.898854	16213	17216.9	24186.8	18632.5	18758.1	18930.9	KRT8
ENSG00000182378	-0.024227	0.983347	0.822731	0.89883	466.141	435.526	490.441	459.029	477.77	478.768	PLCXD1
ENSG00000176476	0.0435041	1.03061	0.82246	0.898592	254.435	231.405	376.184	278.729	286.481	270.074	SGF29
ENSG00000229692	0.0812416	1.05793	0.822215	0.898383	29.1338	25.2626	24.7915	25.7571	23.5712	25.6682	SOS1-IT1
ENSG00000183337	-0.0266548	0.981694	0.822204	0.898383	2134.54	2263.53	1706.3	2059.65	2130.47	2028.91	BCOR
ENSG00000115507	-0.0369773	0.974695	0.822042	0.898309	247.637	301.13	242.526	300.806	229.366	282.35	OTX1
ENSG00000178074	-0.0241338	0.983411	0.821929	0.898244	1044.93	919.557	877.404	924.497	1027.16	938.564	C2orf69
ENSG00000174547	-0.031591	0.978341	0.82188	0.898244	1191.57	1212.6	1666.42	1378.01	1375.29	1406.17	MRPL11
ENSG00000229119	0.0676006	1.04797	0.821804	0.898224	43.7007	69.7247	89.465	70.8321	60.7412	61.3805	AC026403.1
ENSG00000167863	-0.0285271	0.980421	0.821755	0.898224	3788.36	3725.72	5026.21	4249.01	4357.05	4182.8	ATP5PD
ENSG00000221164	0.0767471	1.05464	0.821741	0.898224	35.9317	35.3676	24.7915	30.3566	30.8239	30.1323	SNORA11F
ENSG00000102796	0.0565268	1.03996	0.82172	0.898224	70.8922	56.5881	61.4398	54.2739	58.928	69.1926	DHRS12
ENSG00000175536	-0.0644324	0.956321	0.821486	0.898108	42.7296	43.4516	46.3493	41.3954	54.3951	42.4084	LIPT2
ENSG00000258793	-0.162413	0.893529	0.821416	0.898089	14.5669	14.147	5.38946	3.67959	12.6922	22.3202	AL355102.4
ENSG00000139318	0.0965607	1.06922	0.821263	0.89798	93.2282	87.9137	75.4524	46.9148	147.773	44.6404	DUSP6
ENSG00000226964	-0.0657195	0.955469	0.821126	0.897889	50.4986	43.4516	77.6082	57.0336	60.7412	61.3805	RHEBP2
ENSG00000272288	-0.0819523	0.944778	0.821034	0.897846	27.1915	32.3361	23.7136	35.876	25.3844	26.7842	AL451165.2
ENSG00000234589	-0.0894999	0.939849	0.820903	0.897761	18.4514	27.2836	37.7262	34.9561	24.4778	29.0162	AC125807.1
ENSG00000072736	0.029508	1.02066	0.820661	0.897554	1264.41	1331.84	976.57	1182.99	1120.54	1198.59	NFATC3
ENSG00000246640	0.0668425	1.04742	0.820597	0.897543	70.8922	67.7037	43.1157	50.5944	52.5819	71.4246	AC009720.1
ENSG00000165819	0.020476	1.01429	0.820199	0.897166	1185.75	1126.71	1255.74	1226.22	1165.87	1123.82	METTL3
ENSG00000167065	-0.0327849	0.977531	0.820095	0.897109	199.081	188.964	205.877	212.496	201.262	193.07	DUSP18
ENSG00000197323	-0.0244408	0.983202	0.820001	0.897065	3027	2843.55	2388.61	2853.52	2866.62	2680.65	TRIM33
ENSG00000088305	-0.0358618	0.975449	0.81993	0.897046	1176.03	1185.32	805.185	994.409	1145.02	1108.2	DNMT3B
ENSG00000230295	-0.106137	0.929073	0.819924	0.897046	52.4408	50.5251	16.1684	26.677	56.2083	45.7564	GTF2IP23
ENSG00000170471	0.0296227	1.02075	0.819765	0.896982	4239.94	4016.75	3040.73	3789.06	3542.93	3737.52	RALGAPB
ENSG00000279583	0.116534	1.08413	0.819736	0.896982	12.6246	13.1365	20.4799	11.0388	19.0383	12.2761	AC009086.3
ENSG00000100528	0.0182527	1.01273	0.819722	0.896982	1949.05	2002.82	2139.61	2079.89	1964.57	1968.64	CNIH1
ENSG00000267013	0.076032	1.05411	0.819592	0.896966	53.412	34.3571	52.8167	31.2765	48.9556	53.5685	LINC01929
ENSG00000120784	0.031013	1.02173	0.819366	0.896777	491.39	496.157	382.651	431.432	464.171	446.404	ZFP30
ENSG00000154832	-0.0241936	0.98337	0.81898	0.896412	1534.38	1584.47	1894.93	1704.57	1655.42	1737.63	CXXC1
ENSG00000184227	0.0797265	1.05682	0.818369	0.895802	32.0472	27.2836	48.5051	34.9561	35.3568	31.2483	ACOT1
ENSG00000170633	0.0199021	1.01389	0.818271	0.895752	1135.25	1144.9	1254.67	1172.87	1137.76	1175.16	RNF34
ENSG00000255185	0.13095	1.09501	0.818148	0.895676	21.3648	20.21	6.46735	15.6383	18.1317	10.0441	PDXDC2P
ENSG00000250903	0.0529088	1.03735	0.817933	0.895498	101.968	87.9137	75.4524	71.752	94.2848	90.3968	GMDS-AS1
ENSG00000278921	0.0818323	1.05836	0.817621	0.895215	33.9894	56.5881	29.1031	43.2352	36.2634	33.4803	EPB41L4A-AS2
ENSG00000166847	0.0207114	1.01446	0.817499	0.895139	3359.13	3326.57	2920.01	3277.59	3008.96	3183.97	DCTN5
ENSG00000205581	0.0180559	1.01259	0.817438	0.89513	11646.7	11454	12870	12103.1	12005	11412.3	HMGN1
ENSG00000184640	0.0152886	1.01065	0.81742	0.89513	21370.6	22504.9	22884.7	22396.7	21303.8	22355.9	2020-09-09
ENSG00000186409	-0.0842149	0.943298	0.817192	0.894977	68.95	46.4831	30.181	40.4755	66.1807	47.9884	CCDC30
ENSG00000117228	-0.0221692	0.984751	0.817101	0.894936	1254.7	1182.29	1386.17	1305.33	1332.68	1242.12	GBP1
ENSG00000270157	0.0692307	1.04916	0.817063	0.894936	108.766	121.26	57.1282	74.5117	95.1914	104.905	AC004918.3
ENSG00000154222	0.020669	1.01443	0.816787	0.894707	2218.05	2456.53	2529.81	2371.5	2250.14	2480.89	CC2D1B
ENSG00000255182	-0.0433121	0.970425	0.816745	0.894707	105.853	98.0187	114.256	109.468	108.79	109.369	AC084125.2
ENSG00000198142	0.0225329	1.01574	0.816715	0.894707	1039.11	1032.73	906.507	976.011	1009.94	946.376	SOWAHC
ENSG00000181929	0.0183471	1.0128	0.816558	0.894631	1615.95	1595.58	1716	1568.42	1652.7	1643.88	PRKAG1
ENSG00000213169	0.0694854	1.04934	0.816301	0.894406	40.7873	39.4096	46.3493	34.0362	46.2358	40.1763	AC069218.1
ENSG00000064199	0.028185	1.01973	0.816224	0.894381	329.212	366.812	385.885	349.561	359.008	351.543	SPA17
ENSG00000043093	-0.0179234	0.987653	0.816172	0.894381	1809.21	1698.65	1679.35	1774.48	1763.31	1714.19	DCUN1D1
ENSG00000152464	-0.0284857	0.980449	0.815951	0.894255	503.044	440.579	557.27	499.504	507.688	523.408	RPP38
ENSG00000066135	0.0259078	1.01812	0.815881	0.894237	2505.51	2632.36	2046.92	2386.21	2281.87	2390.49	KDM4A
ENSG00000273284	0.166631	1.12243	0.81586	0.894237	20.3937	18.189	7.54524	6.43928	6.34609	29.0162	AP001033.2
ENSG00000273026	-0.0852685	0.942609	0.815772	0.894233	24.2782	25.2626	36.6483	25.7571	29.0107	36.8283	AL358472.3
ENSG00000173218	0.0245638	1.01717	0.81563	0.894136	4055.42	3990.47	3263.86	3859.89	3651.72	3608.06	VANGL1
ENSG00000268222	0.078253	1.05574	0.815605	0.894136	33.9894	36.3781	33.4146	24.8372	38.9832	34.5963	EEF1A1P7
ENSG00000149089	-0.0217944	0.985007	0.815466	0.894072	764.277	727.562	807.341	773.634	795.982	763.35	APIP
ENSG00000201302	-0.119632	0.920422	0.815437	0.894072	12.6246	14.147	18.3242	9.19897	20.8515	18.9722	SNORA65
ENSG00000235552	-0.0478284	0.967391	0.815346	0.894055	160.236	165.722	247.915	217.096	183.13	191.954	RPL6P27
ENSG00000185340	-0.0325464	0.977693	0.81527	0.89403	1244.98	1396.51	1740.79	1543.59	1353.53	1584.73	GAS2L1
ENSG00000261596	-0.131777	0.912706	0.815001	0.893794	12.6246	10.105	9.70102	10.1189	16.3185	8.92808	AC005632.2
ENSG00000174130	-0.0383923	0.973739	0.814742	0.893568	303.963	337.508	233.902	309.085	310.959	279.002	TLR6
ENSG00000249685	0.102969	1.07398	0.814338	0.893183	17.4803	25.2626	18.3242	23.9173	18.1317	14.5081	AC079921.2
ENSG00000213281	-0.01795	0.987635	0.8143	0.893183	7335.89	7059.37	6638.73	7085.05	7395.01	6816.59	NRAS
ENSG00000260300	-0.11743	0.921828	0.814016	0.892945	16.5092	11.1155	11.8568	14.7184	12.6922	15.6241	AC009119.2
ENSG00000278784	0.059272	1.04194	0.813998	0.892945	55.3542	60.6301	64.6735	56.1137	65.2741	51.3364	AL136295.7
ENSG00000197530	0.0231565	1.01618	0.813907	0.892941	1738.32	1776.46	2055.54	1757	1809.54	1915.07	MIB2
ENSG00000136021	-0.024868	0.982911	0.813833	0.892919	2847.34	2785.95	2306.69	2781.77	2739.7	2556.78	SCYL2
ENSG00000236829	-0.143746	0.905166	0.813685	0.892814	14.5669	11.1155	5.38946	11.9587	14.5054	7.81207	Z97634.1
ENSG00000104960	0.0245401	1.01716	0.813512	0.892682	3565.01	3815.66	4421.51	3841.49	3682.55	4079.01	PTOV1
ENSG00000166839	-0.0543619	0.96302	0.813071	0.892256	67.9789	62.6511	70.0629	72.6719	71.6202	63.6125	ANKDD1A
ENSG00000196834	0.0702785	1.04992	0.813063	0.892256	34.9606	45.4726	49.583	38.6357	42.6095	42.4084	POTEI
ENSG00000277662	-0.130486	0.913523	0.813039	0.892256	7.76901	11.1155	14.0126	11.0388	13.5988	11.1601	AL354696.1
ENSG00000240914	0.0811453	1.05786	0.812628	0.891944	57.2965	34.3571	45.2714	33.1163	57.1148	39.0603	RPL15P2
ENSG00000226334	0.0706476	1.05019	0.812625	0.891944	50.4986	49.5146	35.5704	47.8347	38.0766	43.5244	AL359182.1
ENSG00000227057	0.0295294	1.02068	0.812366	0.891772	1723.75	1708.76	2252.79	1877.51	1813.17	1878.24	WDR46
ENSG00000275765	-0.0721784	0.951201	0.812304	0.891762	35.9317	38.3991	48.5051	35.876	45.3292	47.9884	AC091982.3
ENSG00000272864	0.10368	1.07451	0.812165	0.891667	27.1915	14.147	33.4146	23.9173	26.291	18.9722	AC135803.1
ENSG00000265112	0.0987024	1.07081	0.811907	0.891441	33.0183	31.3256	16.1684	20.2377	25.3844	30.1323	MIR3153
ENSG00000166348	0.0388234	1.02728	0.811762	0.891341	1358.61	1415.71	903.273	1185.75	1181.28	1214.22	USP54
ENSG00000175390	-0.0251001	0.982752	0.811677	0.891304	4585.66	4795.84	5799.06	5218.58	5094.1	5132.53	EIF3F
ENSG00000197951	0.0313615	1.02198	0.81167	0.891304	287.453	304.161	348.159	308.166	297.36	313.599	ZNF71
ENSG00000188486	-0.0258975	0.982209	0.81166	0.891304	6994.05	7506.01	8705.05	8121.77	7208.26	8295.3	H2AFX
ENSG00000099814	-0.0164754	0.988645	0.811584	0.891304	3440.7	3504.42	3437.4	3470.77	3389.72	3643.77	CEP170B
ENSG00000146426	0.0300045	1.02102	0.811542	0.891304	296.194	320.329	337.38	303.566	301.893	329.223	TIAM2
ENSG00000102054	0.0177683	1.01239	0.811404	0.891294	6478.39	6611.72	7175.52	6855.07	6638.01	6521.96	RBBP7
ENSG00000182117	-0.0374093	0.974403	0.811303	0.891241	1274.12	1361.15	1941.28	1540.83	1576.55	1578.04	NOP10
ENSG00000143156	0.0215366	1.01504	0.811132	0.891112	874.014	927.641	970.102	890.461	909.305	930.752	NME7
ENSG00000155438	0.0369252	1.02592	0.811125	0.891112	1499.42	1427.84	2114.82	1652.14	1731.58	1528.93	NIFK
ENSG00000231549	-0.161162	0.894304	0.811097	0.891112	6.79789	8.08402	15.0905	7.35918	19.0383	6.69606	ATP5MDP1
ENSG00000255142	0.116405	1.08403	0.810772	0.890889	23.307	18.189	10.7789	19.3178	14.5054	14.5081	AP006621.2
ENSG00000228748	0.112644	1.08121	0.810644	0.890807	20.3937	20.21	17.2463	11.9587	15.4119	26.7842	AL450306.1
ENSG00000214837	0.122255	1.08844	0.810443	0.890644	45.6429	34.3571	10.7789	29.4367	19.9449	34.5963	LINC01347
ENSG00000023697	0.0178043	1.01242	0.81044	0.890644	1720.84	1791.62	1841.04	1754.24	1759.68	1773.34	DERA
ENSG00000115963	-0.0195551	0.986537	0.810432	0.890644	2671.57	2675.81	2875.81	2842.48	2880.22	2609.23	RND3
ENSG00000105556	0.0234458	1.01638	0.810338	0.890644	898.292	862.969	997.05	920.817	873.041	919.592	MIER2
ENSG00000188566	0.0263043	1.0184	0.810295	0.890644	528.293	576.997	538.946	542.739	498.622	574.745	NDOR1
ENSG00000214491	-0.0290536	0.980063	0.810166	0.89063	2796.84	3005.23	2244.17	2802.93	2596.46	2812.34	SEC14L6
ENSG00000144837	0.117896	1.08515	0.810089	0.890602	25.2493	17.1785	11.8568	13.7985	21.758	14.5081	PLA1A
ENSG00000142444	-0.0289074	0.980162	0.810039	0.890602	597.243	685.121	772.848	688.083	704.416	703.086	TIMM29
ENSG00000116898	-0.0300852	0.979362	0.810024	0.890602	2113.17	2166.52	2829.46	2420.25	2378.88	2458.57	MRPS15
ENSG00000138029	-0.0183697	0.987348	0.809893	0.890561	2785.19	2773.83	3053.67	2871.92	2922.83	2927.29	HADHB
ENSG00000188818	0.0555093	1.03923	0.809687	0.890393	127.218	134.397	99.166	95.6693	106.977	146.197	ZDHHC11
ENSG00000099337	0.0470458	1.03315	0.809575	0.890327	288.425	306.182	466.727	319.204	369.887	337.035	KCNK6
ENSG00000144567	0.0176227	1.01229	0.809307	0.89009	4052.51	4369.41	4081.97	4168.97	3972.66	4211.82	RETREG2
ENSG00000239763	0.133169	1.0967	0.809009	0.88982	9.71127	13.1365	23.7136	9.19897	15.4119	17.8562	AC009120.1
ENSG00000229097	-0.0685728	0.953581	0.80899	0.88982	51.4697	40.4201	56.0504	60.7132	47.1424	46.8724	CALM2P2
ENSG00000228393	-0.0762627	0.948512	0.808612	0.889499	36.9028	32.3361	35.5704	33.1163	42.6095	34.5963	LINC01004
ENSG00000226800	-0.0958921	0.935694	0.808064	0.888954	23.307	20.21	42.0378	33.1163	29.9173	27.9002	CACTIN-AS1
ENSG00000151611	-0.0319949	0.978067	0.807802	0.888724	332.125	297.088	301.81	304.486	300.08	349.311	MMAA
ENSG00000107521	-0.0239068	0.983566	0.80778	0.888724	1505.25	1496.55	1737.56	1630.06	1516.72	1671.78	HPS1
ENSG00000169627	0.109956	1.0792	0.807647	0.888669	18.4514	14.147	25.8694	19.3178	19.9449	14.5081	BOLA2B
ENSG00000279529	0.108879	1.07839	0.807367	0.888419	17.4803	29.3046	20.4799	19.3178	28.1041	14.5081	AC008764.8
ENSG00000278500	0.126667	1.09177	0.807253	0.888351	9.71127	16.168	19.402	12.8786	10.879	17.8562	AC009336.2
ENSG00000232499	0.0750569	1.0534	0.807249	0.888351	33.9894	44.4621	47.4272	45.9949	36.2634	36.8283	AL391058.1
ENSG00000138326	0.0297914	1.02086	0.807241	0.888351	23043.9	22636.3	30186.3	24776.5	25504	24033.3	RPS24
ENSG00000165355	0.030891	1.02164	0.807154	0.888351	348.634	380.959	320.134	343.122	358.101	325.875	FBXO33
ENSG00000112584	-0.0240289	0.983482	0.807142	0.888351	1079.89	1156.01	983.037	1136.99	1055.26	1081.41	FAM120B
ENSG00000242798	0.0738117	1.05249	0.80712	0.888351	40.7873	39.4096	44.1935	34.9561	47.1424	35.7123	AC073842.2
ENSG00000231312	0.0475213	1.03349	0.807095	0.888351	180.63	132.376	129.347	151.783	135.081	141.733	AC007388.1
ENSG00000198589	-0.0385257	0.973649	0.806739	0.888191	2090.84	2114.98	1405.57	1979.62	1783.25	2002.12	LRBA
ENSG00000170348	-0.0155575	0.989274	0.806681	0.888184	4667.23	4769.57	4541.16	4755.87	4683.42	4690.59	TMED10
ENSG00000179978	-0.160131	0.894944	0.805831	0.887307	18.4514	10.105	6.46735	5.51938	17.2251	16.7401	AC140134.1
ENSG00000164465	0.0233573	1.01632	0.805664	0.887181	838.082	836.696	883.871	841.706	787.822	889.459	DCBLD1
ENSG00000213920	0.0793382	1.05653	0.805622	0.887181	33.0183	35.3676	44.1935	41.3954	34.4502	30.1323	MDP1
ENSG00000227827	0.111863	1.08062	0.805343	0.886942	27.1915	40.4201	19.402	38.6357	16.3185	25.6682	AC138969.2
ENSG00000233025	0.121168	1.08761	0.805258	0.886907	21.3648	19.1995	11.8568	11.9587	21.758	14.5081	CRYZP1
ENSG00000154719	0.0310071	1.02173	0.804844	0.886509	1104.17	1082.25	1416.35	1220.7	1168.59	1134.98	MRPL39
ENSG00000241170	-0.144239	0.904857	0.804745	0.886457	14.5669	17.1785	6.46735	8.27908	15.4119	18.9722	AP001992.1
ENSG00000226650	-0.131981	0.912577	0.804632	0.88639	10.6824	9.09452	14.0126	11.9587	12.6922	12.2761	KIF4B
ENSG00000265912	-0.182434	0.881215	0.804576	0.886387	14.5669	8.08402	5.38946	10.1189	18.1317	3.34803	AC037487.1
ENSG00000100558	0.0433628	1.03051	0.804411	0.886263	359.317	388.033	541.101	436.951	439.694	371.631	PLEK2
ENSG00000163468	-0.0318318	0.978177	0.803983	0.885848	13173.3	13387.1	17977.1	15561.9	15057.5	14909.9	CCT3
ENSG00000148950	0.0287218	1.02011	0.80388	0.885794	397.191	416.327	389.119	365.199	412.496	401.763	IMMP1L
ENSG00000246339	0.15747	1.11533	0.803874	0.885794	17.4803	10.105	6.46735	10.1189	6.34609	14.5081	EXTL3-AS1
ENSG00000239377	0.104993	1.07549	0.803759	0.885775	18.4514	24.2521	18.3242	18.3979	16.3185	22.3202	AC073111.1
ENSG00000139239	0.0422209	1.0297	0.803741	0.885775	191.312	208.163	267.317	227.215	209.421	209.81	RPL14P1
ENSG00000249839	-0.130267	0.913662	0.803728	0.885775	11.6535	11.1155	19.402	15.6383	19.9449	10.0441	AC011330.1
ENSG00000126698	-0.0287664	0.980258	0.803721	0.885775	5586.89	5465.81	7106.54	6228.62	6298.95	5995.2	DNAJC8
ENSG00000204469	-0.0231363	0.984091	0.803693	0.885775	15525.4	16521.7	14001.8	15988.7	14523.5	16283.7	PRRC2A
ENSG00000115137	0.0512266	1.03615	0.803628	0.885775	245.695	215.237	146.593	198.698	181.317	207.578	DNAJC27
ENSG00000151366	-0.0434153	0.970355	0.803537	0.885775	645.799	695.226	1035.85	831.587	819.553	796.831	NDUFC2
ENSG00000179406	0.0377878	1.02654	0.803175	0.885535	258.32	223.321	215.578	210.656	220.3	249.986	LINC00174
ENSG00000268798	0.0627277	1.04444	0.803042	0.885447	69.9211	81.8507	106.711	71.752	97.9112	77.0046	AC027307.3
ENSG00000276449	-0.114628	0.923621	0.802951	0.885404	17.4803	20.21	22.6357	16.5582	32.6371	15.6241	AC004076.2
ENSG00000185839	-0.137652	0.908997	0.802595	0.88507	7.76901	16.168	18.3242	22.0775	11.7856	12.2761	AL035411.1
ENSG00000143612	0.0181748	1.01268	0.802556	0.88507	5081.91	5279.87	5624.44	5359.32	5196.54	5228.5	C1orf43
ENSG00000213260	-0.0883474	0.9406	0.802519	0.88507	26.2204	35.3676	25.8694	26.677	29.9173	36.8283	YWHAZP5
ENSG00000230580	0.109038	1.07851	0.802469	0.88507	20.3937	16.168	28.0252	19.3178	24.4778	15.6241	AC021016.1
ENSG00000237854	-0.0472824	0.967758	0.802403	0.88507	198.11	251.615	172.463	229.974	184.037	229.898	LINC00674
ENSG00000257949	-0.157912	0.896321	0.80215	0.884867	9.71127	13.1365	6.46735	6.43928	9.97243	16.7401	TEN1
ENSG00000213684	-0.132227	0.912422	0.801963	0.884719	16.5092	9.09452	10.7789	12.8786	12.6922	14.5081	LDHBP2
ENSG00000137098	-0.15826	0.896105	0.801877	0.884681	10.6824	9.09452	14.0126	5.51938	20.8515	11.1601	SPAG8
ENSG00000104497	-0.0296865	0.979633	0.801833	0.884681	548.687	477.968	451.636	493.065	522.193	494.392	SNX16
ENSG00000245205	0.0553776	1.03913	0.801817	0.884681	100.997	77.8087	113.179	87.3902	100.631	92.6288	EEF1A1P4
ENSG00000119383	-0.019179	0.986794	0.801815	0.884681	10820.3	11315.6	12275	11677.2	11384.9	11808.5	PTPA
ENSG00000145495	0.0361666	1.02539	0.801804	0.884681	9836.54	9416.87	6611.79	8417.06	8338.77	8470.51	2020-03-06
ENSG00000163946	-0.0333949	0.977118	0.801787	0.884681	4593.43	4380.53	3242.3	4241.65	4163.94	4097.99	FAM208A
ENSG00000267279	-0.0905521	0.939163	0.801589	0.884681	26.2204	32.3361	23.7136	23.9173	32.6371	31.2483	AC090409.1
ENSG00000104679	0.0284859	1.01994	0.80157	0.884681	455.458	463.821	514.154	497.664	453.292	453.1	R3HCC1
ENSG00000115568	0.0258074	1.01805	0.801503	0.884681	1136.22	1152.98	991.66	1093.76	1006.31	1124.94	ZNF142
ENSG00000116489	-0.0158072	0.989103	0.801047	0.884286	11134.9	11010.4	11307.1	11433.4	11513.6	10871	CAPZA1
ENSG00000175348	0.0295593	1.0207	0.800948	0.884234	983.751	992.313	1219.1	1045.92	1098.78	983.204	TMEM9B
ENSG00000160117	-0.0634332	0.956984	0.800938	0.884234	50.4986	68.7142	63.5956	64.3928	67.9939	58.0325	ANKLE1
ENSG00000112685	-0.0205496	0.985857	0.800822	0.88421	1862.62	1863.37	1711.69	1903.27	1778.72	1834.72	EXOC2
ENSG00000067533	0.0403597	1.02837	0.800425	0.88383	1105.14	1074.16	1560.79	1226.22	1323.61	1084.76	RRP15
ENSG00000061987	0.0383069	1.02691	0.800364	0.88382	2039.37	2101.84	1402.34	1811.28	1751.52	1836.95	MON2
ENSG00000164346	-0.0343739	0.976455	0.800144	0.883636	1418.82	1455.12	1953.14	1655.82	1705.29	1580.27	NSA2
ENSG00000154743	-0.0333974	0.977117	0.799428	0.882902	271.915	248.584	284.563	276.889	283.761	262.262	TSEN2
ENSG00000132646	-0.0292976	0.979897	0.799363	0.882888	6332.72	6249.96	8107.9	7148.52	6985.24	6979.52	PCNA
ENSG00000095564	-0.044917	0.969346	0.799207	0.882773	3592.2	3224.51	2077.1	3041.18	3011.68	3123.71	BTAF1
ENSG00000148335	0.0356754	1.02504	0.798852	0.882438	980.838	974.124	1336.59	1026.61	1078.84	1104.85	NTMT1
ENSG00000163701	-0.154057	0.89872	0.798833	0.882438	15.538	18.189	9.70102	5.51938	20.8515	22.3202	IL17RE
ENSG00000089737	-0.0221118	0.98479	0.798701	0.882388	2587.08	2636.4	2984.68	2742.21	2837.61	2753.2	DDX24
ENSG00000122008	0.0478123	1.0337	0.798617	0.882352	894.408	914.505	545.413	769.954	800.514	707.55	POLK
ENSG00000228118	0.145769	1.10632	0.798518	0.8823	8.74014	17.1785	24.7915	17.478	19.9449	7.81207	MYL6P5
ENSG00000169599	-0.0322086	0.977922	0.798441	0.882273	724.46	771.013	953.934	864.703	826.805	811.339	NFU1
ENSG00000141580	-0.0182538	0.987427	0.798081	0.881933	5230.49	5350.61	5743.01	5529.5	5425	5576.7	WDR45B
ENSG00000267249	0.0949295	1.06801	0.798057	0.881933	24.2782	25.2626	29.1031	28.5168	23.5712	21.2042	AP005482.3
ENSG00000188868	-0.0591365	0.959838	0.797932	0.881883	60.2098	78.8192	72.2187	74.5117	70.7136	74.7726	ZNF563
ENSG00000121964	0.0305752	1.02142	0.797915	0.881883	314.645	298.098	312.589	304.486	300.08	301.323	GTDC1
ENSG00000256618	0.100041	1.0718	0.797753	0.881801	25.2493	21.2205	31.2589	22.0775	29.9173	20.0882	MTRNR2L1
ENSG00000281207	-0.08088	0.945481	0.797655	0.88175	45.6429	31.3256	35.5704	39.5556	35.3568	44.6404	SLFNL1-AS1
ENSG00000239883	-0.053501	0.963595	0.797619	0.88175	110.708	111.155	82.9976	114.067	97.9112	104.905	PARGP1
ENSG00000234742	0.083126	1.05931	0.797465	0.881656	36.9028	35.3676	48.5051	45.9949	37.17	30.1323	AC144530.1
ENSG00000272980	-0.143178	0.905522	0.797391	0.881632	16.5092	8.08402	10.7789	9.19897	14.5054	15.6241	Z94721.2
ENSG00000238103	0.124836	1.09038	0.797284	0.881571	16.5092	15.1575	32.3367	19.3178	25.3844	13.3921	RPL9P7
ENSG00000274267	0.12933	1.09379	0.797199	0.881534	11.6535	14.147	18.3242	11.0388	12.6922	16.7401	HIST1H3B
ENSG00000144635	0.0267013	1.01868	0.79715	0.881534	1418.82	1465.23	1706.3	1496.67	1578.36	1428.49	DYNC1LI1
ENSG00000232546	-0.100679	0.932594	0.797089	0.881529	44.6718	26.2731	33.4146	50.5944	23.5712	37.9443	AC027644.1
ENSG00000253982	-0.0448718	0.969376	0.797032	0.881523	151.496	141.47	156.294	166.501	132.361	165.169	AC100810.1
ENSG00000095574	-0.0355725	0.975645	0.796933	0.881471	719.605	656.826	530.323	607.132	699.884	648.401	IKZF5
ENSG00000005073	-0.0440207	0.969948	0.796588	0.881147	203.937	195.027	268.395	247.452	218.487	220.97	HOXA11
ENSG00000269397	-0.126862	0.915821	0.796567	0.881147	17.4803	17.1785	15.0905	10.1189	19.0383	25.6682	AC011503.2
ENSG00000183605	0.0425215	1.02991	0.796451	0.881111	563.253	714.425	894.65	737.758	688.098	681.882	SFXN4
ENSG00000227507	0.157154	1.11509	0.796305	0.881007	13.5958	6.06301	12.9347	11.9587	7.25268	10.0441	LTB
ENSG00000114125	-0.0278343	0.980892	0.796262	0.881007	1756.77	1779.49	2181.65	1906.95	1949.16	1971.99	RNF7
ENSG00000267152	0.105169	1.07562	0.796222	0.881007	17.4803	24.2521	31.2589	23.9173	24.4778	18.9722	AC093227.1
ENSG00000145734	-0.0353438	0.975799	0.796027	0.880872	1516.9	1383.38	1067.11	1411.12	1355.34	1300.15	BDP1
ENSG00000250802	-0.168034	0.890055	0.795986	0.880872	12.6246	16.168	3.23367	13.7985	9.06585	13.3921	ZBED3-AS1
ENSG00000183580	0.0357067	1.02506	0.795749	0.880738	1303.25	1482.41	1080.05	1272.22	1129.6	1371.58	FBXL7
ENSG00000270225	0.124418	1.09007	0.795634	0.880668	25.2493	20.21	23.7136	25.7571	28.1041	8.92808	MTCO2P22
ENSG00000225259	-0.132559	0.912212	0.795633	0.880668	20.3937	20.21	7.54524	18.3979	19.9449	14.5081	ST13P6
ENSG00000233593	-0.0533445	0.9637	0.79533	0.880448	122.362	134.397	90.5429	116.827	121.482	122.761	AL590094.1
ENSG00000187535	-0.0419742	0.971325	0.795018	0.880159	955.589	1011.51	651.046	897.82	904.772	893.924	IFT140
ENSG00000178896	0.0507584	1.03581	0.795009	0.880159	618.608	670.974	1074.66	731.318	777.85	772.279	EXOSC4
ENSG00000135945	0.0225943	1.01578	0.79476	0.879989	1469.31	1453.1	1304.25	1375.25	1378.01	1409.52	REV1
ENSG00000270069	-0.0804753	0.945746	0.794689	0.879968	74.7767	63.6616	87.3092	47.8347	100.631	90.3968	MIR222HG
ENSG00000160796	0.0368964	1.0259	0.794252	0.879542	2152.99	2151.36	1548.93	1824.16	1821.33	2062.39	NBEAL2
ENSG00000259746	-0.13683	0.909515	0.794114	0.879446	17.4803	13.1365	18.3242	9.19897	17.2251	27.9002	HSPE1P3
ENSG00000263020	-0.123181	0.918161	0.794039	0.879422	24.2782	10.105	23.7136	24.8372	17.2251	21.2042	AL662899.2
ENSG00000104852	-0.036215	0.97521	0.793765	0.879175	7529.14	8015.3	10879.2	8955.2	8907.2	9231.63	SNRNP70
ENSG00000230092	-0.156494	0.897203	0.793619	0.879071	7.76901	9.09452	11.8568	14.7184	8.15926	8.92808	AL669831.4
ENSG00000272787	-0.149434	0.901604	0.793036	0.878483	11.6535	8.08402	10.7789	9.19897	14.5054	10.0441	AC253536.6
ENSG00000135336	0.0242091	1.01692	0.793019	0.878483	1291.6	1157.03	1180.29	1213.34	1230.24	1123.82	ORC3
ENSG00000180385	0.0380386	1.02672	0.792924	0.878475	280.656	227.363	251.149	230.894	254.75	254.45	EMC3-AS1
ENSG00000143621	-0.0265343	0.981776	0.792819	0.878415	8846.96	8881.3	10865.1	9795.07	9739.44	9587.64	ILF2
ENSG00000108094	0.0191518	1.01336	0.792639	0.878273	2875.51	2898.12	3107.56	2955.63	2943.68	2862.56	CUL2
ENSG00000197361	-0.0854996	0.942458	0.792546	0.878228	29.1338	31.3256	32.3367	33.1163	30.8239	34.5963	FBXL22
ENSG00000109705	0.116573	1.08416	0.792491	0.878225	19.4225	21.2205	15.0905	20.2377	14.5054	16.7401	NKX3-2
ENSG00000226243	0.104492	1.07512	0.792459	0.878225	22.3359	21.2205	35.5704	26.677	26.291	20.0882	RPL37AP1
ENSG00000186812	0.0338541	1.02374	0.792419	0.878225	385.537	357.718	317.978	356.92	352.662	326.991	ZNF397
ENSG00000100297	-0.0228965	0.984255	0.792337	0.878225	5225.63	5603.24	6128.89	5701.52	5570.06	5957.26	MCM5
ENSG00000269951	-0.127142	0.915644	0.791883	0.877781	15.538	11.1155	24.7915	17.478	22.6646	15.6241	AC090181.2
ENSG00000103550	0.0370565	1.02602	0.791774	0.877718	1325.59	1299.51	1805.47	1418.48	1514	1383.85	KNOP1
ENSG00000102910	-0.0239365	0.983545	0.791677	0.877667	2833.75	2825.36	2439.27	2816.73	2664.45	2754.31	LONP2
ENSG00000131828	0.0231926	1.01621	0.791639	0.877667	3437.79	3570.1	4038.86	3633.59	3571.94	3663.86	PDHA1
ENSG00000152253	-0.0269016	0.981526	0.791603	0.877667	1075.04	1121.66	1264.37	1248.3	1138.67	1137.21	SPC25
ENSG00000259051	-0.127223	0.915592	0.791569	0.877667	15.538	18.189	24.7915	22.9974	29.0107	11.1601	HNRNPUP1
ENSG00000156261	0.0298578	1.02091	0.791522	0.877667	9635.52	9775.6	12367.7	10446.4	10649.7	10029.6	CCT8
ENSG00000197713	0.018119	1.01264	0.79145	0.877667	2522.99	2400.95	2476.99	2427.61	2445.97	2435.13	RPE
ENSG00000084463	-0.0184417	0.987299	0.791431	0.877667	4051.54	4277.46	4308.33	4379.63	4143.09	4276.55	WBP11
ENSG00000164077	0.0459329	1.03235	0.791195	0.877537	235.984	235.447	321.212	241.933	239.338	286.814	MON1A
ENSG00000157741	-0.0500842	0.96588	0.79099	0.877366	1441.15	1344.98	812.73	1246.46	1227.52	1253.28	UBN2
ENSG00000156802	0.0286679	1.02007	0.790928	0.877356	8923.68	9427.99	7330.74	8652.55	8385	8140.17	ATAD2
ENSG00000185633	0.119408	1.08629	0.790823	0.877297	41.7584	32.3361	23.7136	18.3979	48.049	23.4362	NDUFA4L2
ENSG00000196584	-0.0217561	0.985033	0.790809	0.877297	1586.82	1483.42	1432.52	1549.11	1497.68	1525.58	XRCC2
ENSG00000232811	-0.112086	0.92525	0.790784	0.877297	18.4514	22.2311	15.0905	18.3979	20.8515	21.2042	AL360270.1
ENSG00000171311	0.0397483	1.02793	0.790575	0.877194	928.397	1048.9	1384.01	1046.84	1106.03	1116.01	EXOSC1
ENSG00000242262	0.0949273	1.06801	0.790361	0.877014	24.2782	34.3571	47.4272	34.9561	32.6371	31.2483	AC092597.1
ENSG00000229638	0.0545176	1.03851	0.790344	0.877014	238.897	225.342	370.795	269.53	286.481	246.638	RPL4P4
ENSG00000113456	0.0210543	1.0147	0.7902	0.876951	2002.46	2025.05	2032.9	2051.37	2053.41	1864.85	RAD1
ENSG00000158286	-0.0262736	0.981953	0.790189	0.876951	1119.71	1112.56	963.635	1068	1060.7	1128.29	RNF207
ENSG00000278730	-0.0308684	0.978831	0.790052	0.876902	968.213	932.694	762.069	899.66	897.519	925.172	AC005332.7
ENSG00000113758	0.0241013	1.01685	0.789937	0.876832	6486.15	6875.46	7776.99	6922.23	6783.07	7082.2	DBN1
ENSG00000012174	0.0364935	1.02562	0.789791	0.876727	1831.54	1677.43	1275.15	1584.06	1553.89	1527.82	MBTPS2
ENSG00000023330	-0.0284461	0.980476	0.789606	0.876579	1645.09	1721.9	2060.93	1859.11	1850.34	1824.68	ALAS1
ENSG00000226180	-0.124628	0.917241	0.789558	0.876579	14.5669	12.126	22.6357	15.6383	19.0383	18.9722	AC010536.1
ENSG00000231167	0.0628459	1.04452	0.789371	0.876434	69.9211	75.7877	67.9072	57.9535	74.34	72.5406	YBX1P2
ENSG00000150593	0.0386107	1.02712	0.789318	0.876433	2040.34	1951.28	1413.12	1667.77	1872.1	1723.12	PDCD4
ENSG00000162526	-0.0762808	0.9485	0.789318	0.876433	50.4986	47.4936	37.7262	50.5944	41.7029	51.3364	TSSK3
ENSG00000242485	-0.0457865	0.968762	0.789287	0.876433	1759.68	1851.24	2831.62	2167.28	2281.87	2199.65	MRPL20
ENSG00000229833	-0.0408987	0.972049	0.789266	0.876433	634.146	637.627	903.273	736.838	771.504	727.638	PET100
ENSG00000182134	-0.0300045	0.979417	0.789214	0.876433	728.345	667.942	607.931	726.719	651.835	668.49	TDRKH
ENSG00000005302	0.0239421	1.01673	0.78892	0.876279	856.534	873.074	923.753	884.941	885.733	837.007	MSL3
ENSG00000140575	-0.032392	0.977798	0.788912	0.876279	19258.4	19199.5	14465.3	18426.5	17546	18154.1	IQGAP1
ENSG00000178605	-0.0309205	0.978796	0.788885	0.876279	2740.52	2791.01	3531.17	3071.54	3012.58	3173.93	GTPBP6
ENSG00000162804	-0.157472	0.896595	0.788863	0.876279	30.1049	17.1785	5.38946	24.8372	16.3185	17.8562	SNED1
ENSG00000166471	-0.0234754	0.98386	0.788796	0.876279	1368.32	1288.39	1350.6	1397.32	1408.83	1264.44	TMEM41B
ENSG00000086730	-0.0744111	0.94973	0.788626	0.87624	55.3542	41.4306	44.1935	46.9148	52.5819	49.1044	LAT2
ENSG00000225850	-0.187029	0.878413	0.78838	0.876024	14.5669	11.1155	6.46735	22.0775	4.53292	10.0441	AL355490.1
ENSG00000106571	-0.0406293	0.972231	0.788182	0.875862	278.713	292.035	234.98	245.613	285.574	299.091	GLI3
ENSG00000198231	0.0169448	1.01181	0.788041	0.875762	6525	6575.34	6452.26	6439.28	6262.69	6624.63	DDX42
ENSG00000236017	-0.0511414	0.965172	0.787832	0.875588	184.514	144.502	164.917	140.744	175.877	196.418	ASMTL-AS1
ENSG00000198814	-0.0450395	0.969263	0.787788	0.875588	333.096	300.119	234.98	317.365	313.678	264.494	GK
ENSG00000274523	0.0399306	1.02806	0.787663	0.875515	3221.23	3467.03	4828.95	3744.9	3762.33	3693.99	RCC1L
ENSG00000143382	0.073568	1.05232	0.787454	0.875341	98.0838	98.0187	60.3619	63.4729	90.6585	90.3968	ADAMTSL4
ENSG00000103018	0.0263666	1.01844	0.787405	0.875341	4530.31	4605.87	5441.2	4988.6	4644.43	4678.31	CYB5B
ENSG00000122882	0.0200704	1.01401	0.787405	0.875341	1745.11	1829.01	1865.83	1766.2	1796.85	1801.24	ECD
ENSG00000008130	0.0208101	1.01453	0.787369	0.875341	2521.04	2726.34	2810.06	2665.86	2635.44	2639.36	NADK
ENSG00000267040	-0.100243	0.932876	0.787312	0.875341	21.3648	39.4096	52.8167	39.5556	42.6095	39.0603	AC027097.1
ENSG00000115904	-0.0474542	0.967642	0.787173	0.875316	2313.22	2259.48	1394.79	2101.05	2071.55	1995.42	SOS1
ENSG00000110048	0.0296885	1.02079	0.78715	0.875316	3170.73	3172.98	2527.66	2959.31	2791.37	2941.8	OSBP
ENSG00000226450	0.123827	1.08962	0.786973	0.875209	12.6246	28.2941	20.4799	17.478	20.8515	17.8562	CYP2D8P
ENSG00000136149	-0.0613047	0.958397	0.786831	0.875108	79.6324	97.0082	127.191	103.028	111.51	101.557	RPL13AP25
ENSG00000106484	0.154354	1.11292	0.786826	0.875108	26.2204	32.3361	20.4799	11.0388	46.2358	13.3921	MEST
ENSG00000215795	0.143065	1.10425	0.786781	0.875108	13.5958	18.189	15.0905	16.5582	7.25268	18.9722	AL390728.2
ENSG00000129347	-0.0253463	0.982585	0.786774	0.875108	1416.87	1455.12	1661.03	1552.79	1510.37	1549.02	KRI1
ENSG00000114127	-0.0569395	0.961301	0.78677	0.875108	2284.09	2081.63	1155.5	2016.41	1872.1	1855.92	XRN1
ENSG00000124541	-0.0440136	0.969953	0.786603	0.875108	1535.35	1559.21	2334.71	1954.78	1798.66	1842.53	RRP36
ENSG00000268575	0.0582138	1.04118	0.786273	0.874833	131.102	114.187	88.3871	101.189	116.949	102.673	AL031282.2
ENSG00000154096	-0.156637	0.897114	0.78627	0.874833	7.76901	16.168	18.3242	13.7985	9.06585	24.5522	THY1
ENSG00000214135	0.0280221	1.01961	0.786202	0.874833	621.521	649.753	565.893	594.254	592.907	616.037	AC132008.2
ENSG00000196388	0.0829762	1.0592	0.785749	0.874422	118.477	74.7772	65.7514	78.1913	61.6478	106.021	INCA1
ENSG00000104915	-0.0310304	0.978721	0.785714	0.874422	1835.43	1932.08	2372.44	2121.28	2037.1	2113.72	STX10
ENSG00000260398	0.161395	1.11837	0.785677	0.874422	28.1627	19.1995	5.38946	13.7985	19.0383	14.5081	AC068700.1
ENSG00000112701	0.030564	1.02141	0.785452	0.874264	2644.38	2712.19	2115.9	2480.04	2465	2371.52	SENP6
ENSG00000228107	-0.153809	0.898874	0.785218	0.874061	9.71127	9.09452	14.0126	12.8786	8.15926	15.6241	AP000692.1
ENSG00000120438	-0.0327204	0.977575	0.785182	0.874061	10922.3	11412.6	14606.5	12985.3	12399.4	12402.2	TCP1
ENSG00000130150	0.0385465	1.02708	0.784961	0.873891	1017.74	922.589	720.031	864.703	915.651	810.223	MOSPD2
ENSG00000121022	-0.0283173	0.980563	0.784885	0.873864	2846.37	2680.86	3338.23	3060.5	3087.83	2890.46	COPS5
ENSG00000116455	-0.0463403	0.96839	0.784772	0.873795	1294.51	1337.91	2042.6	1643.86	1572.02	1610.4	WDR77
ENSG00000110104	0.0446545	1.03144	0.784397	0.873436	1025.51	1120.65	1576.96	1287.86	1114.19	1206.41	CCDC86
ENSG00000122705	0.0423015	1.02976	0.784165	0.873235	4817.76	5232.38	7434.22	5794.43	5547.39	5635.85	CLTA
ENSG00000237758	-0.123997	0.917642	0.784111	0.873232	30.1049	13.1365	21.5578	18.3979	29.9173	22.3202	BANF1P3
ENSG00000251143	-0.107287	0.928332	0.783969	0.873131	23.307	26.2731	22.6357	20.2377	23.5712	34.5963	AP002490.1
ENSG00000169946	-0.0735717	0.950282	0.783775	0.872973	76.719	64.6721	70.0629	91.9897	77.0597	52.4524	ZFPM2
ENSG00000235847	0.144372	1.10525	0.783238	0.872432	16.5092	13.1365	10.7789	11.0388	15.4119	10.0441	LDHAP7
ENSG00000279159	-0.0827	0.944289	0.783	0.872225	124.304	93.9767	60.3619	80.951	125.109	89.2808	AC003681.1
ENSG00000280734	0.100675	1.07228	0.782883	0.872151	38.8451	34.3571	28.0252	24.8372	42.6095	26.7842	LINC01232
ENSG00000102780	0.0534385	1.03774	0.782807	0.872124	2135.51	1687.54	1131.79	1560.15	1650.89	1564.65	DGKH
ENSG00000174579	0.0293345	1.02054	0.782658	0.872016	1441.15	1454.11	1199.69	1401	1316.36	1295.69	MSL2
ENSG00000204514	-0.0583365	0.960371	0.782414	0.871801	228.215	177.848	268.395	224.455	286.481	189.722	ZNF814
ENSG00000227376	-0.14624	0.903602	0.782196	0.871617	33.9894	23.2416	38.8041	17.478	67.0873	21.2042	FTH1P16
ENSG00000224945	0.127208	1.09218	0.781865	0.871305	23.307	15.1575	21.5578	21.1576	11.7856	22.3202	AL353150.1
ENSG00000011523	-0.0354612	0.97572	0.781718	0.871198	697.269	677.037	540.024	673.365	617.384	672.954	CEP68
ENSG00000235472	0.144099	1.10504	0.781483	0.870994	11.6535	15.1575	14.0126	9.19897	15.4119	12.2761	EIF4A1P7
ENSG00000188158	-0.0437623	0.970122	0.781269	0.870813	1512.04	1460.18	1000.28	1456.2	1292.79	1347.02	NHS
ENSG00000138439	-0.035951	0.975389	0.780919	0.870481	714.749	798.297	594.996	725.799	747.026	688.578	FAM117B
ENSG00000160218	-0.0367335	0.97486	0.780827	0.870435	1820.86	1785.56	1334.43	1688.93	1613.72	1767.76	TRAPPC10
ENSG00000113387	-0.0282709	0.980595	0.780809	0.870435	5851.04	5767.95	7035.4	6296.7	6620.79	6103.46	SUB1
ENSG00000225616	0.0964632	1.06915	0.780405	0.870079	28.1627	34.3571	50.6609	35.876	30.8239	39.0603	AL138785.1
ENSG00000156697	-0.0459434	0.968656	0.780329	0.870052	1021.63	935.725	1443.3	1159.99	1262.87	1085.88	UTP14A
ENSG00000273729	-0.142822	0.905746	0.78014	0.869899	19.4225	36.3781	18.3242	45.075	15.4119	21.2042	AC007686.3
ENSG00000184785	0.0368856	1.0259	0.780026	0.869829	277.742	277.888	317.978	298.967	280.135	271.19	SMIM10
ENSG00000125841	-0.0268773	0.981543	0.780023	0.869829	1739.29	1676.42	1886.31	1861.87	1649.08	1891.64	NRSN2
ENSG00000008952	-0.0326799	0.977603	0.779992	0.869829	5124.63	5117.18	6549.27	5763.16	5986.18	5423.81	SEC62
ENSG00000189190	0.0459272	1.03235	0.779938	0.869829	201.023	253.636	250.071	212.496	212.141	258.914	ZNF600
ENSG00000225951	0.171707	1.12639	0.779478	0.869448	13.5958	6.06301	12.9347	8.27908	12.6922	7.81207	ODF2-AS1
ENSG00000229980	0.122752	1.08881	0.779312	0.869319	20.3937	24.2521	15.0905	20.2377	19.9449	14.5081	TOB1-AS1
ENSG00000271933	0.113242	1.08166	0.779225	0.86928	40.7873	26.2731	31.2589	24.8372	44.4227	21.2042	AL603756.1
ENSG00000167925	0.0323381	1.02267	0.779072	0.869167	614.723	555.776	538.946	516.062	553.017	604.877	GHDC
ENSG00000225518	-0.17028	0.88867	0.77866	0.868764	12.6246	11.1155	8.62313	5.51938	14.5054	16.7401	LINC01703
ENSG00000130270	-0.0362346	0.975197	0.778654	0.868764	1283.83	1268.18	972.258	1126.87	1235.68	1253.28	ATP8B3
ENSG00000124802	0.0431804	1.03038	0.778537	0.868742	442.834	444.621	614.398	505.024	487.743	463.144	EEF1E1
ENSG00000124602	0.0752612	1.05355	0.77844	0.868691	107.795	106.103	59.284	79.1112	91.5651	89.2808	UNC5CL
ENSG00000011009	-0.0316774	0.978282	0.778084	0.868352	2063.64	2034.14	2552.45	2295.14	2154.05	2348.08	LYPLA2
ENSG00000065615	-0.023653	0.983739	0.77788	0.86818	1007.06	960.988	1007.83	1032.12	1010.84	980.972	CYB5R4
ENSG00000116221	-0.0350674	0.975986	0.777821	0.868172	4470.1	4624.06	6042.66	5148.67	5133.99	5225.16	MRPL37
ENSG00000232456	0.148661	1.10854	0.777784	0.868172	13.5958	10.105	14.0126	11.0388	11.7856	11.1601	AL355994.2
ENSG00000272086	0.062879	1.04455	0.777503	0.867932	81.5746	95.9977	78.6861	72.6719	79.7795	93.7448	AC025181.2
ENSG00000179909	0.148417	1.10835	0.777341	0.867808	14.5669	17.1785	14.0126	10.1189	20.8515	10.0441	ZNF154
ENSG00000160207	-0.0575675	0.960883	0.777286	0.867804	98.0838	105.092	85.1534	97.5091	109.697	92.6288	HSF2BP
ENSG00000234743	-0.0910057	0.938868	0.777265	0.867804	43.7007	34.3571	70.0629	51.5142	54.3951	51.3364	EIF5AP4
ENSG00000240889	0.0867956	1.06201	0.77725	0.867804	55.3542	55.5776	70.0629	78.1913	48.9556	42.4084	NDUFB2-AS1
ENSG00000119669	-0.0265703	0.981751	0.777051	0.867714	1348.89	1443	1281.61	1456.2	1294.6	1399.48	IRF2BPL
ENSG00000180425	-0.0666028	0.954884	0.776925	0.86763	70.8922	66.6932	63.5956	73.5918	60.7412	77.0046	C11orf71
ENSG00000270019	-0.147679	0.902702	0.776798	0.867546	17.4803	15.1575	8.62313	18.3979	10.879	16.7401	AC110769.2
ENSG00000232480	0.0450988	1.03175	0.776755	0.867546	588.503	633.585	435.468	554.698	483.21	570.281	TGFB2-AS1
ENSG00000227939	0.0651818	1.04622	0.776725	0.867546	75.7479	97.0082	94.8544	92.9096	92.4717	69.1926	RPL3P2
ENSG00000260589	-0.118948	0.920859	0.776682	0.867546	26.2204	14.147	30.181	22.9974	29.9173	23.4362	STAM-AS1
ENSG00000228224	-0.177752	0.88408	0.776663	0.867546	4.85563	14.147	9.70102	8.27908	10.879	13.3921	NACAP1
ENSG00000188375	-0.0811395	0.945311	0.776314	0.867292	52.4408	48.5041	56.0504	42.3153	68.9005	54.6845	H3F3C
ENSG00000173681	-0.0414999	0.971644	0.776298	0.867292	600.156	573.965	436.546	518.822	543.951	597.065	BCLAF3
ENSG00000213903	-0.0390571	0.973291	0.776044	0.867105	318.53	264.752	285.641	275.049	307.332	311.367	LTB4R
ENSG00000124097	0.0939935	1.06732	0.775888	0.866987	33.0183	33.3466	34.4925	25.7571	35.3568	33.4803	HMGB1P1
ENSG00000237399	0.0562363	1.03975	0.775716	0.866853	100.997	98.0187	92.6987	87.3902	93.3782	100.441	PITRM1-AS1
ENSG00000280128	-0.0517431	0.96477	0.775669	0.866853	239.868	158.649	204.799	203.297	215.767	206.462	AL662795.1
ENSG00000224699	-0.0661364	0.955193	0.77566	0.866853	97.1127	77.8087	66.8293	78.1913	84.3124	91.5128	LAMTOR5-AS1
ENSG00000269693	-0.137661	0.908991	0.775562	0.866853	16.5092	21.2205	10.7789	22.0775	13.5988	17.8562	AC010422.6
ENSG00000229133	-0.177044	0.884514	0.775548	0.866853	3.88451	15.1575	12.9347	11.0388	12.6922	12.2761	RPS7P4
ENSG00000175324	0.0418535	1.02944	0.775478	0.866853	464.199	453.716	619.788	516.062	477.77	498.856	LSM1
ENSG00000176209	-0.0384248	0.973717	0.775178	0.866596	241.811	237.468	223.124	243.773	248.404	228.782	SMIM19
ENSG00000281468	-0.120475	0.919884	0.775163	0.866596	21.3648	42.4411	22.6357	21.1576	36.2634	36.8283	AC006504.8
ENSG00000274667	-0.189221	0.877079	0.775087	0.866596	3.88451	12.126	15.0905	12.8786	15.4119	6.69606	AC090517.2
ENSG00000005700	-0.0370174	0.974668	0.77494	0.866502	5486.87	5324.34	3947.24	5064.95	5103.17	4975.17	IBTK
ENSG00000124549	0.0488843	1.03446	0.774933	0.866502	234.042	242.521	206.955	244.693	179.504	237.71	BTN2A3P
ENSG00000266921	-0.140816	0.907006	0.774914	0.866502	16.5092	18.189	12.9347	23.9173	10.879	17.8562	AC006213.1
ENSG00000244257	0.126281	1.09148	0.774824	0.866502	34.9606	17.1785	18.3242	21.1576	24.4778	18.9722	PKD1P1
ENSG00000228002	-0.165011	0.891922	0.774657	0.866414	9.71127	12.126	9.70102	14.7184	13.5988	6.69606	DHX9P1
ENSG00000066427	-0.0336063	0.976975	0.774596	0.866404	443.805	428.453	388.041	414.874	457.825	417.388	ATXN3
ENSG00000144810	-0.0336231	0.976964	0.774525	0.866381	8038.99	8083.01	6235.6	7550.52	7297.1	8039.73	COL8A1
ENSG00000119421	-0.0358305	0.97547	0.774322	0.866211	1299.37	1371.25	1741.87	1489.31	1540.29	1492.1	NDUFA8
ENSG00000166685	0.0259827	1.01817	0.774235	0.866172	1058.53	1052.94	1009.98	1011.89	967.326	1089.23	COG1
ENSG00000110911	0.032786	1.02299	0.774218	0.866172	1465.43	1475.33	1189.99	1259.34	1378.92	1401.71	SLC11A2
ENSG00000223886	-0.17455	0.886044	0.774168	0.866172	6.79789	11.1155	11.8568	12.8786	6.34609	14.5081	AC073073.1
ENSG00000215908	0.0301327	1.02111	0.774167	0.866172	712.807	644.7	609.009	645.768	655.461	624.965	CROCCP2
ENSG00000214810	-0.156094	0.897452	0.774037	0.866172	12.6246	9.09452	10.7789	11.9587	9.97243	14.5081	CYCSP55
ENSG00000121775	-0.0386521	0.973564	0.773776	0.865945	611.81	592.154	763.147	703.721	610.132	706.434	TMEM39B
ENSG00000231050	-0.17402	0.886369	0.773647	0.865858	12.6246	8.08402	12.9347	19.3178	6.34609	12.2761	AL109917.1
ENSG00000133997	-0.043523	0.970283	0.773554	0.865811	517.61	431.484	610.087	482.946	571.148	552.425	MED6
ENSG00000250659	0.155116	1.11351	0.77349	0.865797	12.6246	10.105	12.9347	11.0388	10.879	10.0441	AP001363.1
ENSG00000164609	0.0231052	1.01614	0.773489	0.865797	1495.53	1458.15	1585.58	1528.87	1470.48	1466.44	SLU7
ENSG00000124198	0.0472856	1.03332	0.77346	0.865797	5439.28	5394.06	3428.77	4639.04	4527.49	4637.02	ARFGEF2
ENSG00000142102	0.0305448	1.0214	0.773407	0.865797	1173.12	1176.22	1028.31	1044.08	1060.7	1205.29	PGGHG
ENSG00000225200	0.0695176	1.04937	0.773294	0.865797	90.3148	97.0082	140.126	104.868	118.763	87.0487	AC246787.1
ENSG00000126759	0.101244	1.0727	0.773264	0.865797	31.0761	24.2521	38.8041	27.5969	29.9173	30.1323	CFP
ENSG00000148688	-0.0349295	0.976079	0.773243	0.865797	1064.35	1162.08	1395.87	1206.91	1304.58	1197.48	RPP30
ENSG00000117262	-0.0347891	0.976174	0.773192	0.865797	371.941	324.371	365.405	349.561	368.98	369.399	GPR89A
ENSG00000154493	-0.189467	0.87693	0.77311	0.865797	6.79789	6.06301	20.4799	17.478	9.06585	11.1601	C10orf90
ENSG00000178093	0.0695454	1.04939	0.773052	0.865797	76.719	70.7352	99.166	87.3902	80.6861	65.8446	TSSK6
ENSG00000235554	0.168745	1.12408	0.772908	0.865718	14.5669	8.08402	16.1684	6.43928	12.6922	15.6241	AC005822.1
ENSG00000205138	0.0485159	1.0342	0.772703	0.865546	237.926	295.067	351.393	273.21	302.799	277.886	SDHAF1
ENSG00000135930	0.0315706	1.02212	0.772476	0.865349	4024.35	4037.97	4997.1	4489.1	4158.5	4127	EIF4E2
ENSG00000106327	0.173068	1.12745	0.772404	0.865325	8.74014	14.147	11.8568	9.19897	6.34609	15.6241	TFR2
ENSG00000254759	0.112695	1.08125	0.772182	0.865135	33.0183	19.1995	31.2589	25.7571	29.9173	21.2042	NAP1L1P1
ENSG00000271303	0.0436352	1.03071	0.771927	0.864906	261.233	317.298	247.915	286.088	249.311	266.726	SRXN1
ENSG00000188710	-0.158567	0.895915	0.771844	0.864871	11.6535	9.09452	15.0905	17.478	9.06585	13.3921	QRFP
ENSG00000154146	-0.0426359	0.970879	0.771609	0.864665	275.8	271.825	353.548	304.486	308.239	314.715	NRGN
ENSG00000105771	0.0265181	1.01855	0.771597	0.864665	1118.74	1049.91	1170.59	1147.11	1053.45	1076.95	SMG9
ENSG00000264215	-0.134229	0.911157	0.771174	0.864292	18.4514	19.1995	10.7789	18.3979	18.1317	16.7401	AC126365.1
ENSG00000136146	0.0294357	1.02061	0.771116	0.864284	1080.86	1073.15	1272.99	1119.52	1129.6	1107.08	MED4
ENSG00000271380	-0.161366	0.894178	0.77101	0.864222	19.4225	25.2626	5.38946	19.3178	19.0383	17.8562	AL451085.2
ENSG00000079387	0.0329917	1.02313	0.770942	0.864203	1065.33	1132.77	909.74	1042.24	949.194	1047.93	SENP1
ENSG00000100629	0.0326088	1.02286	0.770914	0.864203	430.209	390.054	398.82	408.434	390.738	392.835	CEP128
ENSG00000165609	-0.0249606	0.982847	0.770709	0.864057	3357.18	3509.47	3892.27	3726.5	3538.4	3680.6	NUDT5
ENSG00000019995	0.0334465	1.02345	0.77067	0.864057	743.883	765.961	627.333	723.959	703.51	660.678	ZRANB1
ENSG00000104213	0.131119	1.09514	0.770555	0.863999	22.3359	19.1995	31.2589	12.8786	29.0107	24.5522	PDGFRL
ENSG00000273188	0.108755	1.0783	0.770533	0.863999	33.9894	37.3886	40.9599	22.0775	32.6371	50.2204	AL022328.3
ENSG00000230897	0.102866	1.0739	0.770526	0.863999	30.1049	31.3256	34.4925	22.0775	30.8239	36.8283	RPS18P12
ENSG00000160200	0.0858803	1.06134	0.770171	0.86374	270.944	275.867	114.256	190.419	195.822	237.71	CBS
ENSG00000167524	-0.0605248	0.958915	0.770167	0.86374	197.139	156.628	119.646	157.302	173.158	164.053	SGK494
ENSG00000231982	0.135383	1.09838	0.770137	0.86374	16.5092	17.1785	16.1684	18.3979	14.5054	12.2761	AC112907.2
ENSG00000144481	-0.0518074	0.964727	0.769877	0.863583	176.745	147.533	146.593	180.3	143.24	165.169	TRPM8
ENSG00000115540	-0.0252328	0.982662	0.769861	0.863583	1548.95	1523.84	1647.02	1650.3	1650.89	1498.8	MOB4
ENSG00000268093	-0.16761	0.890317	0.769852	0.863583	13.5958	8.08402	8.62313	12.8786	9.06585	12.2761	AC022154.1
ENSG00000257923	-0.0334115	0.977107	0.769705	0.863561	7312.58	7300.88	5654.62	6981.1	6778.54	6985.1	CUX1
ENSG00000153989	-0.0200913	0.98617	0.769702	0.863561	2922.12	2858.71	2997.62	2964.83	3034.34	2900.51	NUS1
ENSG00000142235	-0.121652	0.919135	0.769684	0.863561	29.1338	26.2731	14.0126	22.0775	28.1041	25.6682	LMTK3
ENSG00000250303	0.128338	1.09303	0.769673	0.863561	15.538	22.2311	23.7136	15.6383	23.5712	16.7401	AP002884.1
ENSG00000258057	-0.135078	0.910621	0.769493	0.863553	18.4514	15.1575	15.0905	12.8786	21.758	18.9722	BCDIN3D-AS1
ENSG00000173041	-0.0442755	0.969777	0.769421	0.863529	665.222	546.682	482.895	549.179	657.274	541.265	ZNF680
ENSG00000240764	0.120972	1.08747	0.769259	0.863405	44.6718	48.5041	21.5578	35.876	23.5712	46.8724	PCDHGC5
ENSG00000136950	0.0402278	1.02828	0.769246	0.863405	2333.62	2397.92	3276.79	2561.91	2630	2594.72	ARPC5L
ENSG00000271550	0.113307	1.0817	0.76918	0.863405	31.0761	26.2731	19.402	21.1576	24.4778	25.6682	BNIP3P11
ENSG00000273356	-0.147885	0.902573	0.769166	0.863405	16.5092	11.1155	10.7789	14.7184	14.5054	13.3921	LINC02019
ENSG00000221886	-0.0519793	0.964612	0.769101	0.863405	128.189	143.491	129.347	149.943	123.296	142.849	ZBED8
ENSG00000082701	0.0358919	1.02519	0.769021	0.863405	3184.32	3178.03	2419.87	2979.55	2762.36	2825.74	GSK3B
ENSG00000204568	-0.0322816	0.977873	0.76897	0.863405	1511.07	1586.49	1886.31	1759.76	1608.28	1727.58	MRPS18B
ENSG00000249532	0.160303	1.11752	0.768773	0.86326	10.6824	10.105	15.0905	11.0388	10.879	10.0441	AC106864.1
ENSG00000105393	0.032578	1.02284	0.768712	0.86325	2020.91	2177.63	2552.45	2195.79	2079.71	2324.65	BABAM1
ENSG00000179271	0.0454582	1.03201	0.768255	0.862852	2470.55	2675.81	3781.24	2964.83	2848.49	2835.78	GADD45GIP1
ENSG00000234912	0.0544769	1.03848	0.768214	0.862852	134.987	138.439	177.852	133.385	145.96	155.125	SNHG20
ENSG00000214541	0.154429	1.11298	0.768146	0.862844	10.6824	12.126	19.402	14.7184	11.7856	11.1601	RPS4XP3
ENSG00000177707	-0.0299859	0.97943	0.767932	0.86266	2008.29	1936.12	1644.86	1962.14	1842.18	1903.91	NECTIN3
ENSG00000070214	0.0315372	1.0221	0.767884	0.86266	7301.9	7411.02	5871.27	6859.67	6740.46	6539.82	SLC44A1
ENSG00000265479	0.0802614	1.05721	0.767852	0.86266	45.6429	46.4831	50.6609	45.075	46.2358	43.5244	DTX2P1-UPK3BP1-PMS2P11
ENSG00000157500	0.0351056	1.02463	0.767766	0.862646	3432.93	3399.33	2616.04	3152.49	3024.37	3045.59	APPL1
ENSG00000151276	0.0445063	1.03133	0.767486	0.862389	567.138	580.028	411.755	490.305	494.995	527.872	MAGI1
ENSG00000120645	-0.179212	0.883185	0.767413	0.862364	13.5958	9.09452	7.54524	6.43928	13.5988	14.5081	IQSEC3
ENSG00000163430	0.01913	1.01335	0.767391	0.862364	37755.5	38938.7	35849.6	37376.3	36656.9	37029.2	FSTL1
ENSG00000109184	-0.0283177	0.980563	0.767242	0.862286	2561.83	2504.02	2142.85	2396.33	2520.31	2436.25	DCUN1D4
ENSG00000148985	-0.035101	0.975963	0.767124	0.862211	479.737	543.65	488.285	540.9	467.798	541.265	PGAP2
ENSG00000255769	-0.0439019	0.970028	0.767119	0.862211	439.92	434.516	338.458	379.918	410.683	462.028	GOLGA2P10
ENSG00000119004	0.0450241	1.0317	0.767097	0.862211	486.534	508.283	677.994	516.062	584.747	518.944	CYP20A1
ENSG00000196741	0.0742517	1.05281	0.767066	0.862211	52.4408	65.6826	70.0629	62.553	59.8346	55.8005	LINC01560
ENSG00000165995	0.120681	1.08725	0.767057	0.862211	46.6141	32.3361	18.3242	32.1964	31.7305	25.6682	CACNB2
ENSG00000119888	0.235376	1.17721	0.767038	0.862211	154.409	162.691	198.332	82.7908	310.052	44.6404	EPCAM
ENSG00000241313	0.152161	1.11123	0.76688	0.862211	16.5092	12.126	30.181	16.5582	23.5712	12.2761	WWTR1-AS1
ENSG00000123473	-0.0306281	0.978994	0.766554	0.861971	2560.86	2474.72	2102.97	2566.51	2318.14	2408.35	STIL
ENSG00000254620	-0.183411	0.880618	0.766344	0.861793	21.3648	22.2311	5.38946	21.1576	25.3844	8.92808	AL050327.1
ENSG00000258477	0.119702	1.08651	0.766314	0.861793	22.3359	22.2311	21.5578	23.9173	19.9449	16.7401	PPIAP6
ENSG00000105647	-0.087537	0.941128	0.765782	0.861276	43.7007	36.3781	59.284	48.7546	49.8622	49.1044	PIK3R2
ENSG00000054523	-0.0361683	0.975242	0.765729	0.861273	4119.52	4146.09	3122.65	3891.17	3967.22	3820.1	KIF1B
ENSG00000240695	-0.185902	0.879099	0.765702	0.861273	6.79789	15.1575	7.54524	10.1189	15.4119	7.81207	AC117382.1
ENSG00000188227	0.178846	1.13198	0.765488	0.861117	12.6246	7.07352	15.0905	10.1189	13.5988	6.69606	ZNF793
ENSG00000100902	0.0315065	1.02208	0.765462	0.861117	1394.54	1396.51	1655.64	1451.6	1530.32	1366	PSMA6
ENSG00000214222	-0.0787509	0.946877	0.765407	0.861117	51.4697	58.6091	53.8946	52.4341	68.9005	51.3364	TUBBP2
ENSG00000234405	-0.140227	0.907376	0.765289	0.861065	23.307	12.126	14.0126	18.3979	16.3185	20.0882	Z69733.1
ENSG00000184056	-0.0289016	0.980166	0.765184	0.861004	715.72	727.562	694.162	731.318	683.565	767.814	VPS33B
ENSG00000168286	-0.031671	0.978287	0.765043	0.860903	965.3	1120.65	1146.88	1169.19	1047.11	1086.99	THAP11
ENSG00000100239	-0.0223668	0.984616	0.764984	0.860893	2361.78	2467.65	2572.93	2560.99	2450.5	2505.44	PPP6R2
ENSG00000248559	0.17097	1.12581	0.764933	0.860893	13.5958	15.1575	14.0126	6.43928	10.879	21.2042	AC109454.2
ENSG00000162482	-0.111646	0.925532	0.764775	0.860773	26.2204	23.2416	28.0252	21.1576	33.5436	29.0162	AKR7A3
ENSG00000232671	-0.103834	0.930556	0.76475	0.860773	28.1627	33.3466	23.7136	29.4367	29.0107	33.4803	AL391069.2
ENSG00000244218	-0.168022	0.890062	0.764746	0.860773	22.3359	10.105	10.7789	11.0388	13.5988	24.5522	RN7SL81P
ENSG00000109270	-0.0268218	0.98158	0.764534	0.860674	785.641	781.118	833.21	837.107	808.674	797.947	LAMTOR3
ENSG00000196510	-0.0365168	0.975006	0.7645	0.860674	1291.6	1369.23	1685.82	1479.19	1570.21	1406.17	ANAPC7
ENSG00000141854	-0.140842	0.90699	0.76431	0.860536	13.5958	18.189	12.9347	15.6383	19.0383	14.5081	MISP3
ENSG00000282951	0.162298	1.11907	0.764207	0.860478	10.6824	12.126	12.9347	11.0388	11.7856	8.92808	AC008537.4
ENSG00000234664	-0.0350323	0.97601	0.764129	0.860447	402.046	444.621	472.116	447.07	470.518	431.896	HMGN2P5
ENSG00000226174	-0.129582	0.914096	0.764009	0.860369	18.4514	18.189	16.1684	18.3979	16.3185	23.4362	TEX22
ENSG00000125107	0.0433853	1.03053	0.763855	0.860253	15842	16071	10954.6	14350.4	13415.6	13832.9	CNOT1
ENSG00000203326	0.0338383	1.02373	0.763411	0.85981	471.968	457.758	421.456	445.23	457.825	416.272	ZNF525
ENSG00000205659	-0.0385215	0.973652	0.763181	0.859608	284.54	274.857	271.629	288.848	265.629	300.207	LIN52
ENSG00000244716	-0.0541247	0.963179	0.763168	0.859608	148.582	150.565	192.943	165.582	187.663	156.241	BX679664.3
ENSG00000267980	-0.140435	0.907246	0.762935	0.859446	12.6246	26.2731	19.402	16.5582	19.0383	29.0162	AC007292.1
ENSG00000181029	-0.0510567	0.965229	0.762788	0.859338	227.244	214.226	298.576	259.411	234.805	272.306	TRAPPC5
ENSG00000117614	-0.0288922	0.980173	0.762595	0.859177	1270.23	1189.36	1413.12	1313.61	1300.95	1335.86	SYF2
ENSG00000173726	-0.0210065	0.985545	0.76253	0.859162	8256.52	8451.84	8956.2	8839.29	8783.9	8414.71	TOMM20
ENSG00000092098	-0.036195	0.975224	0.762301	0.85896	580.734	620.448	511.998	541.82	621.011	594.833	RNF31
ENSG00000173546	0.119436	1.08631	0.762252	0.85896	50.4986	31.3256	23.7136	31.2765	25.3844	41.2923	CSPG4
ENSG00000123552	0.0458348	1.03228	0.762231	0.85896	763.305	649.753	518.466	597.933	663.62	610.457	USP45
ENSG00000135747	0.122667	1.08875	0.762084	0.858888	24.2782	18.189	26.9473	19.3178	19.0383	25.6682	ZNF670-ZNF695
ENSG00000008018	0.0390857	1.02746	0.761974	0.858821	5443.16	5605.26	7438.53	6181.71	6051.45	5757.49	PSMB1
ENSG00000280077	0.0791301	1.05638	0.76196	0.858821	119.449	82.8612	137.97	84.6306	133.268	103.789	AL353763.2
ENSG00000196230	0.0223992	1.01565	0.761841	0.858786	63319.4	64955.1	70080.2	66237.2	62430.2	66631.3	TUBB
ENSG00000216867	0.117762	1.08505	0.761753	0.858744	35.9317	19.1995	29.1031	22.9974	29.0107	25.6682	RPL22P12
ENSG00000164944	-0.0235823	0.983787	0.76139	0.858392	5089.67	5055.54	4593.97	5130.27	5031.55	4820.04	VIRMA
ENSG00000075415	0.0301694	1.02113	0.761185	0.858218	11889.5	12259.4	14690.6	12819.7	12715.8	12498.2	SLC25A3
ENSG00000228205	0.0936855	1.06709	0.761117	0.858199	44.6718	40.4201	58.2061	41.3954	55.3017	36.8283	AC131235.1
ENSG00000204524	0.0857545	1.06124	0.761108	0.858199	124.304	86.9032	60.3619	78.1913	87.0322	91.5128	ZNF805
ENSG00000156504	-0.024019	0.983489	0.761034	0.858199	2958.05	2910.25	2637.6	2871	2865.71	2913.9	FAM122B
ENSG00000273327	-0.184555	0.87992	0.760978	0.858199	8.74014	10.105	9.70102	12.8786	13.5988	5.58005	OR6L2P
ENSG00000133812	-0.0622703	0.957756	0.760822	0.858096	1663.54	1699.66	911.896	1547.27	1448.72	1468.67	SBF2
ENSG00000119041	-0.0267908	0.981601	0.760651	0.857959	1905.35	1853.26	1683.67	1936.38	1795.04	1813.52	GTF3C3
ENSG00000235043	0.16317	1.11974	0.760598	0.857957	11.6535	12.126	25.8694	16.5582	17.2251	10.0441	TECRP1
ENSG00000170445	-0.0413845	0.971722	0.76051	0.857915	2445.3	2583.85	3453.56	2990.59	2845.77	2891.58	HARS
ENSG00000113712	-0.0292179	0.979951	0.760374	0.857819	6996.97	6958.32	5789.35	6787	6681.53	6681.55	CSNK1A1
ENSG00000249031	0.134398	1.09763	0.760361	0.857819	16.5092	21.2205	20.4799	17.478	21.758	13.3921	SUMO2P6
ENSG00000227959	-0.081783	0.944889	0.760349	0.857819	56.3253	43.4516	56.0504	48.7546	56.2083	60.2645	AL451042.2
ENSG00000126005	0.0278197	1.01947	0.760341	0.857819	1421.73	1488.47	1396.95	1407.44	1309.11	1511.08	MMP24OS
ENSG00000118495	0.0316167	1.02216	0.760291	0.857819	1861.65	1684.51	1542.46	1643.86	1567.49	1769.99	PLAGL1
ENSG00000162869	0.0284771	1.01993	0.760209	0.857819	723.489	703.31	732.966	733.158	709.856	672.954	PPP1R21
ENSG00000132915	-0.123627	0.917877	0.76012	0.857819	20.3937	18.189	22.6357	21.1576	19.0383	26.7842	PDE6A
ENSG00000189014	-0.109839	0.926692	0.759919	0.857706	33.0183	44.4621	22.6357	41.3954	35.3568	31.2483	FAM35DP
ENSG00000237991	-0.0997907	0.933168	0.759643	0.857452	30.1049	30.3151	30.181	33.1163	32.6371	31.2483	RPL35P1
ENSG00000172893	0.021913	1.0153	0.7593	0.857122	5146	5232.38	5545.75	5224.1	5061.46	5399.25	DHCR7
ENSG00000213131	-0.119747	0.920349	0.759181	0.857045	34.9606	26.2731	19.402	36.7959	26.291	24.5522	YWHAZP4
ENSG00000185716	0.0429663	1.03023	0.759124	0.857038	437.007	415.316	376.184	427.752	426.095	337.035	MOSMO
ENSG00000105612	-0.0248122	0.982949	0.759064	0.857028	1845.14	1874.48	1755.89	1772.64	1853.06	1947.44	DNASE2
ENSG00000251603	0.19071	1.14133	0.758978	0.856987	22.3359	13.1365	9.70102	11.9587	21.758	5.58005	AC092611.2
ENSG00000222020	0.128429	1.0931	0.758889	0.856944	23.307	25.2626	21.5578	25.7571	24.4778	13.3921	AC062017.1
ENSG00000080200	-0.0625789	0.957551	0.75884	0.856944	1685.88	1580.43	898.961	1482.87	1346.28	1522.24	CRYBG3
ENSG00000259488	-0.100778	0.93253	0.758589	0.856721	30.1049	28.2941	33.4146	30.3566	33.5436	34.5963	AC023355.1
ENSG00000241741	-0.0858508	0.942229	0.75843	0.856597	46.6141	46.4831	64.6735	61.6331	58.0214	46.8724	RPL7AP30
ENSG00000149657	-0.0256473	0.98238	0.75838	0.856597	2457.92	2572.74	2292.68	2563.75	2372.53	2519.95	LSM14B
ENSG00000257433	0.192372	1.14264	0.758338	0.856597	7.76901	10.105	21.5578	14.7184	6.34609	13.3921	AC004241.1
ENSG00000230042	-0.188862	0.877297	0.758285	0.856597	4.85563	18.189	17.2463	16.5582	19.9449	8.92808	AK3P3
ENSG00000172361	-0.106293	0.928972	0.7582	0.856567	32.0472	34.3571	33.4146	37.7158	44.4227	24.5522	CFAP53
ENSG00000138785	-0.0365118	0.97501	0.758185	0.856567	482.65	493.125	571.282	535.38	555.737	493.276	INTS12
ENSG00000187642	-0.0740157	0.94999	0.758183	0.856567	146.64	201.09	291.031	199.618	247.498	224.318	PERM1
ENSG00000164031	-0.0478804	0.967356	0.758137	0.856567	2108.32	2003.83	1374.31	1871.07	1964.57	1836.95	DNAJB14
ENSG00000257489	-0.138834	0.908253	0.758075	0.856567	41.7584	22.2311	16.1684	21.1576	36.2634	31.2483	AC010203.1
ENSG00000230797	0.0571703	1.04042	0.758039	0.856567	159.265	157.638	131.503	164.662	126.015	140.617	YY2
ENSG00000273654	-0.0970653	0.934933	0.758012	0.856567	64.0944	44.4621	33.4146	47.8347	55.3017	49.1044	AC020904.2
ENSG00000267645	0.128532	1.09318	0.757842	0.856563	23.307	38.3991	19.402	30.3566	23.5712	20.0882	AC105052.3
ENSG00000227627	0.178888	1.13201	0.757723	0.856486	21.3648	19.1995	5.38946	14.7184	12.6922	13.3921	AL080276.2
ENSG00000261360	0.157145	1.11508	0.757597	0.856401	17.4803	14.147	23.7136	9.19897	23.5712	16.7401	AC010491.1
ENSG00000089157	-0.0315877	0.978343	0.757514	0.856364	42702.4	43834.6	53398.7	47460.3	47277.5	48294.2	RPLP0
ENSG00000124243	0.0346199	1.02429	0.757461	0.856362	729.316	657.837	814.886	706.481	704.416	738.798	BCAS4
ENSG00000179101	-0.165922	0.891358	0.757431	0.856362	17.4803	19.1995	18.3242	13.7985	36.2634	11.1601	AL590139.1
ENSG00000183742	-0.206989	0.866344	0.757427	0.856362	8.74014	11.1155	10.7789	5.51938	21.758	7.81207	MACC1
ENSG00000144867	0.0472068	1.03326	0.757425	0.856362	2048.11	2032.12	2992.23	2333.78	2247.42	2262.15	SRPRB
ENSG00000179611	0.119361	1.08625	0.757419	0.856362	21.3648	42.4411	43.1157	25.7571	32.6371	40.1763	DGKZP1
ENSG00000258824	-0.137703	0.908965	0.757389	0.856362	19.4225	18.189	17.2463	20.2377	26.291	13.3921	AL122035.1
ENSG00000103966	-0.0242558	0.983328	0.757279	0.856362	5327.6	5552.71	6054.52	5818.35	5618.11	5784.28	EHD4
ENSG00000101104	-0.0495048	0.966268	0.757207	0.856362	1036.19	941.788	693.084	827.908	921.997	1016.68	PABPC1L
ENSG00000228192	0.117643	1.08496	0.757158	0.856362	25.2493	26.2731	34.4925	31.2765	19.0383	29.0162	AL512353.1
ENSG00000134014	0.0319902	1.02242	0.757138	0.856362	974.04	874.084	883.871	966.812	863.069	841.471	ELP3
ENSG00000104529	0.0330906	1.0232	0.757024	0.856362	7441.74	7398.9	9263.4	7853.16	7676.96	8026.34	EEF1D
ENSG00000261238	-0.166293	0.89113	0.756985	0.856362	19.4225	9.09452	10.7789	11.9587	13.5988	18.9722	AC009166.1
ENSG00000184470	0.0358571	1.02517	0.756963	0.856362	770.103	800.318	924.831	878.502	755.185	799.063	TXNRD2
ENSG00000273456	-0.152702	0.899564	0.75688	0.856362	15.538	13.1365	10.7789	13.7985	13.5988	16.7401	AC064836.3
ENSG00000140598	0.0366976	1.02576	0.756757	0.856362	606.954	646.721	546.491	607.132	616.478	530.104	EFL1
ENSG00000264608	0.120796	1.08733	0.756434	0.856059	21.3648	32.3361	28.0252	24.8372	30.8239	18.9722	AC005726.3
ENSG00000233330	0.183148	1.13536	0.756301	0.855966	10.6824	10.105	11.8568	11.9587	10.879	5.58005	AL078581.1
ENSG00000174456	-0.0548016	0.962727	0.756065	0.855757	172.861	164.712	212.345	172.941	181.317	217.622	C12orf76
ENSG00000051341	-0.0407583	0.972144	0.755978	0.855716	1809.21	1702.7	1316.11	1736.77	1563.86	1667.32	POLQ
ENSG00000157315	-0.169522	0.889137	0.755832	0.855607	17.4803	18.189	10.7789	13.7985	28.1041	10.0441	TMED6
ENSG00000103876	0.0323968	1.02271	0.755757	0.85558	987.636	999.387	1096.22	1102.96	954.634	955.304	FAH
ENSG00000264049	-0.194624	0.8738	0.755677	0.855547	9.71127	17.1785	4.31157	11.0388	13.5988	11.1601	MIR4737
ENSG00000168566	-0.0323178	0.977848	0.75548	0.85538	800.208	832.654	698.474	803.07	795.075	786.787	SNRNP48
ENSG00000148303	-0.0356518	0.975591	0.755473	0.85538	33833.1	35015.9	44291.6	39331.1	37725.7	38913	RPL7A
ENSG00000136942	-0.044278	0.969775	0.755329	0.855324	17035.5	17786.9	24841.1	20276.4	20596.7	20648.4	RPL35
ENSG00000224839	0.183363	1.13553	0.755213	0.855251	9.71127	16.168	9.70102	12.8786	6.34609	12.2761	RPL12P17
ENSG00000115307	0.0415301	1.0292	0.75513	0.855214	3435.85	3449.85	4672.66	3752.26	3554.72	3922.77	AUP1
ENSG00000244480	-0.186882	0.878502	0.755088	0.855214	14.5669	8.08402	6.46735	10.1189	9.97243	13.3921	AC005154.3
ENSG00000259943	-0.0576044	0.960858	0.754954	0.855129	152.467	144.502	149.827	133.385	146.867	186.374	AL050341.2
ENSG00000272172	-0.177013	0.884533	0.754927	0.855129	7.76901	10.105	12.9347	13.7985	11.7856	8.92808	AC138696.2
ENSG00000100426	-0.0288049	0.980232	0.754828	0.855101	1369.29	1451.08	1238.5	1373.41	1367.13	1401.71	ZBED4
ENSG00000176014	0.0360994	1.02534	0.754811	0.855101	6642.51	7004.8	8776.19	7327.9	7342.43	7197.14	TUBB6
ENSG00000118298	0.103922	1.07469	0.754778	0.855101	56.3253	72.7562	49.583	41.3954	79.7795	44.6404	CA14
ENSG00000115808	-0.0478629	0.967368	0.75477	0.855101	2702.65	2735.43	1814.09	2536.16	2497.64	2464.15	STRN
ENSG00000206149	-0.0405564	0.97228	0.754759	0.855101	483.621	428.453	375.106	427.752	442.413	455.332	HERC2P9
ENSG00000269161	-0.174753	0.885919	0.754538	0.855059	10.6824	8.08402	14.0126	9.19897	15.4119	12.2761	AC010618.2
ENSG00000136783	0.0235053	1.01643	0.754276	0.854819	1448.92	1457.14	1450.84	1389.96	1449.63	1447.46	NIPSNAP3A
ENSG00000206712	-0.182129	0.881401	0.754175	0.854761	19.4225	14.147	6.46735	10.1189	13.5988	22.3202	RNU6-26P
[truncated: 14,857 more rows]

## Sheet: Top 100 Downregulated(12 genes)
This tab indicates the Top 100 downregulated genes and selection for further analysis via scoring parameters
ID	log2FoldChange	Fold Change	pvalue	padj	LD2-3	LD2-2	LD2-1	Parent-3	Parent-2	Parent-1	Gene.name	Uniprot	Mitotic G2/G2-M Phase	Kinome	Matrsome	Cell Attachment	SCORE	inhbit or actvate?	Druggable?	DRUGS
ENSG00000138759	-4.23294	0.0531813	0.0154822	0.0455571	0	0	10.7789	72.6719	61.6478	66.9606	FRAS1	Involved in extracellular matrix organization (By similarity). Required for the regulation of epidermal-basement membrane adhesion responsible for proper organogenesis during embryonic development (By similarity). Involved in brain organization and function (By similarity).	NO	NO	YES	NO	0.5	INHIBIT	NO
ENSG00000150893	-4.07769	0.0592233	0.00505602	0.0176381	0	1.0105	16.1684	108.548	96.098	83.7007	FREM2	Extracellular matrix protein required for maintenance of the integrity of the skin epithelium and for maintenance of renal epithelia (PubMed:15838507). Required for epidermal adhesion (PubMed:15838507). Involved in the development of eyelids and the anterior segment of the eyeballs (PubMed:29688405, PubMed:30802441).	NO	NO	YES	NO	0.5	INHIBIT	NO
ENSG00000146530	-3.39235	0.0952361	0.00944548	0.0300768	1.94225	3.03151	56.0504	208.817	213.047	217.622	VWDE	VWDE (Von Willebrand Factor D And EGF Domains) is a Protein Coding gene. Diseases associated with VWDE include Hypertrophy Of Breast. Gene Ontology (GO) annotations related to this gene include calcium ion binding. An important paralog of this gene is FBLN2.	NO	NO	YES	NO	0.5	INHIBIT	NO
ENSG00000101825	-3.30078	0.101477	0.00322466	0.0119603	0.971127	4.04201	28.0252	112.227	106.977	104.905	MXRA5	In kidney, has anti-inflammatory and anti-fibrotic properties by limiting the induction of chemokines, fibronectin and collagen expression in response to TGB1 and pro-inflammatory stimuli.	NO	NO	YES	NO	0.5	INHIBIT	NO
ENSG00000168961	-3.54515	0.0856653	5.65e-07	5.23e-06	0.971127	0	9.70102	43.2352	34.4502	43.5244	LGALS9	Binds galactosides (PubMed:18005988). Has high affinity for the Forssman pentasaccharide (PubMed:18005988). Ligand for HAVCR2/TIM3 (PubMed:16286920). Binding to HAVCR2 induces T-helper type 1 lymphocyte (Th1) death (PubMed:16286920). Also stimulates bactericidal activity in infected macrophages by causing macrophage activation and IL1B secretion which restricts intracellular bacterial growth (By …	NO	NO	YES	NO	0.5	INHIBIT	YES	Neutralizing antibody: https://www.sigmaaldrich.com/US/en/product/mm/mabt834
ENSG00000164161	-3.37713	0.0962457	1.24e-11	2.29e-10	3.88451	4.04201	23.7136	114.067	102.444	107.137	HHIP	Modulates hedgehog signaling in several cell types including brain and lung through direct interaction with members of the hedgehog family.	NO	NO	YES	NO	0.5	INHIBIT	YES	Antagonist Shh: Recombinant Human Sonic Hedgehog/Shh https://www.rndsystems.com/products/recombinant-human-sonic-hedgehog-shh-c24ii-n-terminus_1845-sh
ENSG00000163993	-3.31208	0.100685	0.0085264	0.0275815	0.971127	0	4.31157	3.67959	44.4227	3.34803	S100P	May function as calcium sensor and contribute to cellular calcium signaling. In a calcium-dependent manner, functions by interacting with other proteins, such as EZR and PPP5C, and indirectly plays a role in physiological processes like the formation of microvilli in epithelial cells. May stimulate cell proliferation in an autocrine manner via activation of the receptor for activated glycation en…	NO	NO	YES	NO	0.5	INHIBIT	YES	Specific inhibitor: 5-Methyl Cromolyn http://glixxlabs.com/chemical-products/bioactive-screen-leads_p5/C5OH
ENSG00000005249	-3.72908	0.0754112	2.81e-05	0.000180587	4.85563	5.05251	36.6483	205.137	207.608	201.998	PRKAR2B	Regulatory subunit of the cAMP-dependent protein kinases involved in cAMP signaling in cells. Type II regulatory chains mediate membrane association by binding to anchoring proteins, including the MAP2 kinase	YES	NO	NO	NO	2	INHIBIT	YES indirectly	PKA antagonist cAMPS-Rp, triethylammonium salt https://www.tocris.com/products/camps-rp-triethylammonium-salt_1337#:~:text=cAMPS%2DRp%2C%20triethylammonium%20salt%20is,Resistant%20to%20hydrolysis%20by%20phosphodiesterases.; Inhibitor PKI 14-22 amide, myristoylated https://www.tocris.com/products/pki-14-22-amide-myristoylated_2546
ENSG00000081052	-3.89858	0.0670517	4.31e-10	6.49e-09	1.94225	3.03151	3.23367	37.7158	36.2634	47.9884	COL4A4	Type IV collagen is the major structural component of glomerular basement membranes (GBM), forming a 'chicken-wire' meshwork together with laminins, proteoglycans and entactin/nidogen.	NO	NO	YES	NO	0.5	INHIBIT	YES indirectly	Prolyl hydroxylase inhibitors: DMOG https://www.bio-techne.com/p/small-molecules-peptides/dmog_4408 ; integrin b1 blocking antibody https://www.abcam.com/integrin-beta-1-antibody-p5d2-ab24693.html?productWallTab=ShowAll
ENSG00000188153	-3.58271	0.0834638	1.96e-05	0.000130686	16.5092	14.147	93.7766	472.827	497.715	517.828	COL4A5	Type IV collagen is the major structural component of glomerular basement membranes (GBM), forming a 'chicken-wire' meshwork together with laminins, proteoglycans and entactin/nidogen.	NO	NO	YES	NO	0.5	INHIBIT	YES indirectly	Prolyl hydroxylase inhibitors: DMOG https://www.bio-techne.com/p/small-molecules-peptides/dmog_4408 ; integrin b1 blocking antibody https://www.abcam.com/integrin-beta-1-antibody-p5d2-ab24693.html?productWallTab=ShowAll
ENSG00000151388	-3.58232	0.0834864	1.29e-08	1.57e-07	0.971127	1.0105	12.9347	64.3928	56.2083	53.5685	ADAMTS12	Metalloprotease that may play a role in the degradation of COMP. Cleaves also alpha-2 macroglobulin and aggregan. Has anti-tumorigenic properties.	NO	NO	YES	NO	0.5	INHIBIT	YES indirectly	Inhibited by alpha-2-macroglobulin: https://www.abcam.com/recombinant-human-alpha-2-macroglobulin-protein-ab157817.html
ENSG00000225968	-3.414	0.0938175	0.00176663	0.00709592	18.4514	20.21	220.968	924.497	841.311	999.944	ELFN1	Postsynaptic protein that regulates circuit dynamics in the central nervous system by modulating the temporal dynamics of interneuron recruitment. Specifically present in excitatory synapses onto oriens-lacunosum molecular (OLM) interneurons and acts as a regulator of presynaptic release probability to direct the formation of highly facilitating pyramidal-OLM synapses (By similarity). Inhibits ph…	NO	NO	YES	NO	0.5	INHIBIT	YES indirectly	Glumate receptor competitor NS102: https://www.sigmaaldrich.com/US/en/product/sigma/n179
ENSG00000169903	-6.24787	0.0131584	1.02e-05	7.27e-05	0	0	1.07789	11.0388	60.7412	11.1601	TM4SF4		NO	NO	NO	NO	0	INHIBIT
ENSG00000139629	-5.03445	0.0305126	1.88e-05	0.000125771	0	0	2.15578	11.9587	25.3844	30.1323	GALNT6		NO	NO	NO	NO	0	INHIBIT
ENSG00000056487	-4.922	0.0329861	2.46e-07	2.41e-06	0	0	3.23367	23.9173	38.0766	31.2483	PHF21B		NO	NO	NO	NO	0	INHIBIT
ENSG00000112796	-4.6837	0.0389103	1.67e-06	1.4e-05	0	0	3.23367	34.9561	21.758	22.3202	ENPP5		NO	NO	NO	NO	0	INHIBIT
ENSG00000183549	-4.52324	0.0434879	1.68e-17	6.15e-16	2.91338	0	9.70102	79.1112	91.5651	112.717	ACSM5		NO	NO	NO	NO	0	INHIBIT
ENSG00000107485	-4.5197	0.0435947	1.81e-08	2.14e-07	0	0	5.38946	42.3153	28.1041	47.9884	GATA3		NO	NO	NO	NO	0	INHIBIT
ENSG00000023171	-4.47717	0.044899	4.95e-05	0.000302385	0	0	3.23367	9.19897	40.7963	18.9722	GRAMD1B		NO	NO	NO	NO	0	INHIBIT
ENSG00000147481	-4.42634	0.0465093	0.00610452	0.020702	0	0	8.62313	54.2739	63.4609	65.8446	SNTG1		NO	NO	NO	NO	0	INHIBIT
ENSG00000073849	-4.42045	0.0466994	0.00902999	0.0289721	0	0	9.70102	78.1913	69.807	58.0325	ST6GAL1		NO	NO	NO	NO	0	INHIBIT
ENSG00000268460	-4.3819	0.0479642	5.73e-11	9.7e-10	0.971127	0	6.46735	47.8347	57.1148	44.6404	AC006262.1		NO	NO	NO	NO	0	INHIBIT
ENSG00000055732	-4.34414	0.0492362	0.000828541	0.00369987	0	1.0105	11.8568	75.4316	89.7519	93.7448	MCOLN3		NO	NO	NO	NO	0	INHIBIT
ENSG00000276855	-4.34267	0.0492862	1.05e-08	1.29e-07	1.94225	1.0105	2.15578	27.5969	38.9832	36.8283	AC015922.4		NO	NO	NO	NO	0	INHIBIT
ENSG00000196581	-4.32882	0.0497618	0.0138839	0.0415778	0	0	10.7789	67.1525	59.8346	88.1647	AJAP1		NO	NO	NO	NO	0	INHIBIT
ENSG00000123453	-4.31282	0.0503168	0.00730353	0.024082	0.971127	0	23.7136	171.101	145.96	171.865	SARDH		NO	NO	NO	NO	0	INHIBIT
ENSG00000268621	-4.29401	0.0509772	0.000944462	0.00414308	0	1.0105	11.8568	83.7107	91.5651	74.7726	IGFL2-AS1		NO	NO	NO	NO	0	INHIBIT
ENSG00000144857	-4.26292	0.0520875	3.79e-15	1.08e-13	2.91338	0	8.62313	73.5918	67.9939	74.7726	BOC		NO	NO	NO	NO	0	INHIBIT
ENSG00000096696	-4.18919	0.0548188	0.00512928	0.0178422	0	2.021	6.46735	15.6383	123.296	14.5081	DSP		NO	NO	NO	NO	0	INHIBIT
ENSG00000169515	-4.13351	0.0569756	0.00647	0.0217494	0	0	7.54524	43.2352	46.2358	41.2923	CCDC8		NO	NO	NO	NO	0	INHIBIT
ENSG00000176049	-4.12124	0.0574621	0.00225005	0.00874865	0	1.0105	12.9347	69.9122	91.5651	79.2367	JAKMIP2		NO	NO	NO	NO	0	INHIBIT
ENSG00000183729	-4.11349	0.0577718	5.03e-06	3.84e-05	0	0	4.31157	22.9974	28.1041	20.0882	NPBWR1		NO	NO	NO	NO	0	INHIBIT
ENSG00000173930	-4.10678	0.0580412	0.00095678	0.0041895	0.971127	0	10.7789	58.8734	73.4334	68.0766	SLCO4C1		NO	NO	NO	NO	0	INHIBIT
ENSG00000141447	-4.05272	0.0602574	8.87e-05	0.000509348	0	0	5.38946	23.9173	53.4885	8.92808	OSBPL1A		NO	NO	NO	NO	0	INHIBIT
ENSG00000145284	-4.0485	0.0604337	1.75e-07	1.75e-06	0	0	6.46735	36.7959	34.4502	31.2483	SCD5		NO	NO	NO	NO	0	INHIBIT
ENSG00000134755	-4.00035	0.0624848	0.00793095	0.0258682	1.94225	0	23.7136	114.067	191.289	103.789	DSC2		NO	NO	NO	NO	0	INHIBIT
ENSG00000146122	-3.99777	0.0625965	0.00566509	0.0194261	0	2.021	21.5578	122.346	108.79	143.965	DAAM2		NO	NO	NO	NO	0	INHIBIT
ENSG00000116729	-3.98575	0.0631202	0.00873601	0.0281679	0.971127	4.04201	93.7766	514.223	520.38	528.988	WLS		NO	NO	NO	NO	0	INHIBIT
ENSG00000197444	-3.97777	0.0634705	0.00158875	0.00647998	1.94225	3.03151	48.5051	267.69	259.283	313.599	OGDHL		NO	NO	NO	NO	0	INHIBIT
ENSG00000099864	-3.97719	0.0634959	0.00975378	0.0308781	0	0	7.54524	35.876	33.5436	47.9884	PALM		NO	NO	NO	NO	0	INHIBIT
ENSG00000116711	-3.96005	0.0642548	6.2e-07	5.7e-06	0.971127	1.0105	7.54524	27.5969	91.5651	25.6682	PLA2G4A		NO	NO	NO	NO	0	INHIBIT
ENSG00000163093	-3.93353	0.0654469	0.0101543	0.0319426	0	0	7.54524	32.1964	42.6095	39.0603	BBS5		NO	NO	NO	NO	0	INHIBIT
ENSG00000234323	-3.91612	0.0662417	4.85e-05	0.000297253	0	0	4.31157	30.3566	16.3185	15.6241	LINC01505		NO	NO	NO	NO	0	INHIBIT
ENSG00000112655	-3.89634	0.0671559	0.0074161	0.0244198	0.971127	6.06301	90.5429	463.628	496.809	491.044	PTK7		NO	NO	NO	NO	0	INHIBIT
ENSG00000120162	-3.88512	0.0676801	0.000151421	0.000820556	0	0	4.31157	31.2765	20.8515	8.92808	MOB3B		NO	NO	NO	NO	0	INHIBIT
ENSG00000175264	-3.88129	0.0678604	1.14e-06	9.99e-06	1.94225	0	3.23367	21.1576	26.291	27.9002	CHST1		NO	NO	NO	NO	0	INHIBIT
ENSG00000198914	-3.87619	0.0681006	0.00219976	0.00859066	0.971127	1.0105	22.6357	123.266	116.949	119.413	POU3F3		NO	NO	NO	NO	0	INHIBIT
ENSG00000111052	-3.86165	0.0687905	3.57e-21	1.83e-19	4.85563	5.05251	11.8568	87.3902	113.323	111.601	LIN7A		NO	NO	NO	NO	0	INHIBIT
ENSG00000158220	-3.84689	0.0694978	2.31e-08	2.69e-07	0	2.021	5.38946	33.1163	33.5436	36.8283	ESYT3		NO	NO	NO	NO	0	INHIBIT
ENSG00000262995	-3.83669	0.0699908	1.77e-05	0.000118699	0.971127	1.0105	2.15578	13.7985	24.4778	20.0882	AC137056.1		NO	NO	NO	NO	0	INHIBIT
ENSG00000104369	-3.82481	0.0705697	9.4e-12	1.77e-10	1.94225	1.0105	10.7789	68.0724	68.9005	52.4524	JPH1		NO	NO	NO	NO	0	INHIBIT
ENSG00000171004	-3.78297	0.0726459	0.014694	0.0436301	0	2.021	26.9473	104.868	177.691	114.949	HS6ST2		NO	NO	NO	NO	0	INHIBIT
ENSG00000186529	-3.76687	0.0734616	1.2e-06	1.04e-05	0.971127	1.0105	4.31157	31.2765	35.3568	16.7401	CYP4F3		NO	NO	NO	NO	0	INHIBIT
ENSG00000198108	-3.76324	0.0736462	7.69e-14	1.88e-12	3.88451	1.0105	12.9347	87.3902	81.5926	68.0766	CHSY3		NO	NO	NO	NO	0	INHIBIT
ENSG00000199488	-3.75639	0.0739969	8.99e-07	8e-06	0	1.0105	5.38946	31.2765	25.3844	26.7842	RNU1-70P		NO	NO	NO	NO	0	INHIBIT
ENSG00000245848	-3.75397	0.0741214	1.85e-06	1.54e-05	0.971127	0	7.54524	22.0775	56.2083	33.4803	CEBPA		NO	NO	NO	NO	0	INHIBIT
ENSG00000105426	-3.70208	0.0768356	0.0166535	0.0484441	0.971127	2.021	72.2187	289.768	292.827	395.067	PTPRS		NO	NO	NO	NO	0	INHIBIT
ENSG00000198488	-3.69804	0.0770509	6.7e-19	2.8e-17	1.94225	9.09452	18.3242	118.667	119.669	136.153	B3GNT6		NO	NO	NO	NO	0	INHIBIT
ENSG00000125848	-3.68589	0.0777026	4.98e-07	4.65e-06	0.971127	0	6.46735	32.1964	27.1975	33.4803	FLRT3		NO	NO	NO	NO	0	INHIBIT
ENSG00000067606	-3.68296	0.0778609	0.00297092	0.011134	1.94225	0	14.0126	78.1913	61.6478	63.6125	PRKCZ		NO	NO	NO	NO	0	INHIBIT
ENSG00000018236	-3.65873	0.0791793	0.0164746	0.0480424	0.971127	0	18.3242	69.9122	107.884	64.7285	CNTN1		NO	NO	NO	NO	0	INHIBIT
ENSG00000173156	-3.65531	0.0793674	0.0103184	0.0323446	0	1.0105	15.0905	66.2326	76.1531	59.1485	RHOD		NO	NO	NO	NO	0	INHIBIT
ENSG00000109819	-3.63699	0.0803818	6.65e-05	0.000394537	5.82676	11.1155	59.284	321.964	299.173	324.759	PPARGC1A		NO	NO	NO	NO	0	INHIBIT
ENSG00000154639	-3.63311	0.0805983	0.00182813	0.00731165	0.971127	7.07352	38.8041	156.383	221.207	201.998	CXADR		NO	NO	NO	NO	0	INHIBIT
ENSG00000071575	-3.62355	0.0811342	1.63e-10	2.59e-09	0.971127	2.021	10.7789	57.0336	53.4885	54.6845	TRIB2		NO	NO	NO	NO	0	INHIBIT
ENSG00000224417	-3.61726	0.0814886	1.16e-11	2.15e-10	1.94225	3.03151	18.3242	89.23	85.219	106.021	AL606970.1		NO	NO	NO	NO	0	INHIBIT
ENSG00000064655	-3.60747	0.0820433	2.71e-05	0.000175305	0	0	6.46735	31.2765	24.4778	20.0882	EYA2		NO	NO	NO	NO	0	INHIBIT
ENSG00000113532	-3.60383	0.0822508	2.51e-06	2.04e-05	1.94225	0	6.46735	23.9173	52.5819	23.4362	ST8SIA4		NO	NO	NO	NO	0	INHIBIT
ENSG00000187244	-3.59683	0.0826509	2.36e-06	1.93e-05	15.538	15.1575	78.6861	424.993	407.963	487.696	BCAM		NO	NO	NO	NO	0	INHIBIT
ENSG00000198807	-3.5836	0.0834121	2.33e-06	1.91e-05	0.971127	0	9.70102	30.3566	34.4502	60.2645	PAX9		NO	NO	NO	NO	0	INHIBIT
ENSG00000251322	-3.58357	0.0834139	2.21e-11	3.93e-10	2.91338	1.0105	12.9347	66.2326	63.4609	68.0766	SHANK3		NO	NO	NO	NO	0	INHIBIT
ENSG00000170412	-3.56846	0.0842918	3.66e-15	1.04e-13	6.79789	4.04201	25.8694	126.946	168.625	133.921	GPRC5C		NO	NO	NO	NO	0	INHIBIT
ENSG00000003137	-3.55151	0.085288	0.000347998	0.00172287	4.85563	1.0105	22.6357	114.987	106.977	110.485	CYP26B1		NO	NO	NO	NO	0	INHIBIT
ENSG00000147234	-3.53069	0.0865282	0.0107733	0.0335526	2.91338	0	22.6357	105.788	87.9387	100.441	FRMPD3		NO	NO	NO	NO	0	INHIBIT
ENSG00000138271	-3.52299	0.0869912	2.55e-05	0.000165646	2.91338	0	3.23367	13.7985	19.0383	37.9443	GPR87		NO	NO	NO	NO	0	INHIBIT
ENSG00000107282	-3.49126	0.0889257	7.57e-10	1.09e-08	0.971127	3.03151	9.70102	46.9148	59.8346	43.5244	APBA1		NO	NO	NO	NO	0	INHIBIT
ENSG00000134321	-3.46585	0.0905058	6.49e-09	8.19e-08	3.88451	0	12.9347	62.553	70.7136	49.1044	RSAD2		NO	NO	NO	NO	0	INHIBIT
ENSG00000012504	-3.46327	0.0906678	1.52e-06	1.29e-05	0	1.0105	10.7789	46.9148	37.17	42.4084	NR1H4		NO	NO	NO	NO	0	INHIBIT
ENSG00000251630	-3.46163	0.0907705	0.000123014	0.000679917	0	3.03151	2.15578	22.9974	9.06585	24.5522	AC119751.6		NO	NO	NO	NO	0	INHIBIT
ENSG00000179277	-3.44148	0.0920476	0.0106359	0.033203	0	1.0105	12.9347	50.5944	51.6753	47.9884	MEIS3P1		NO	NO	NO	NO	0	INHIBIT
ENSG00000158321	-3.43994	0.0921454	0.0129487	0.0391658	5.82676	0	30.181	133.385	131.455	124.993	AUTS2		NO	NO	NO	NO	0	INHIBIT
ENSG00000130234	-3.43537	0.0924379	1.13e-06	9.85e-06	1.94225	1.0105	4.31157	23.9173	23.5712	30.1323	ACE2		NO	NO	NO	NO	0	INHIBIT
ENSG00000100077	-3.43475	0.0924778	6.41e-20	3.01e-18	14.5669	15.1575	53.8946	315.525	281.041	300.207	GRK3		NO	NO	NO	NO	0	INHIBIT
ENSG00000143845	-3.42891	0.0928531	1.75e-11	3.16e-10	2.91338	5.05251	24.7915	119.587	120.576	107.137	ETNK2		NO	NO	NO	NO	0	INHIBIT
ENSG00000177570	-3.42242	0.0932718	0.0032785	0.0121414	6.79789	1.0105	39.882	171.101	165.905	172.981	SAMD12		NO	NO	NO	NO	0	INHIBIT
ENSG00000167994	-3.42003	0.0934262	2.03e-08	2.38e-07	0.971127	2.021	9.70102	35.876	44.4227	52.4524	RAB3IL1		NO	NO	NO	NO	0	INHIBIT
ENSG00000182118	-3.39048	0.0953597	6.78e-11	1.13e-09	6.79789	1.0105	19.402	81.8709	90.6585	109.369	FAM89A		NO	NO	NO	NO	0	INHIBIT
ENSG00000115648	-3.38984	0.095402	0.00670228	0.0223877	1.94225	1.0105	29.1031	114.987	106.977	112.717	MLPH		NO	NO	NO	NO	0	INHIBIT
ENSG00000025039	-3.3813	0.0959681	0.0121992	0.0373535	0.971127	0	12.9347	49.6745	51.6753	42.4084	RRAGD		NO	NO	NO	NO	0	INHIBIT
ENSG00000154080	-3.36169	0.0972816	4.27e-07	4e-06	14.5669	14.147	60.3619	304.486	318.211	290.162	CHST9		NO	NO	NO	NO	0	INHIBIT
ENSG00000198865	-3.35884	0.0974736	0.0102466	0.0321671	0.971127	1.0105	24.7915	88.3101	106.977	78.1207	CCDC152		NO	NO	NO	NO	0	INHIBIT
ENSG00000113389	-3.35818	0.0975184	4.88e-09	6.27e-08	4.85563	0	11.8568	53.354	66.1807	49.1044	NPR3		NO	NO	NO	NO	0	INHIBIT
ENSG00000185630	-3.34777	0.0982249	0.00290925	0.0109291	0.971127	8.08402	36.6483	131.545	174.971	157.357	PBX1		NO	NO	NO	NO	0	INHIBIT
ENSG00000205795	-3.34444	0.0984514	1.03e-06	9.1e-06	0.971127	2.021	5.38946	34.0362	23.5712	25.6682	CYS1		NO	NO	NO	NO	0	INHIBIT
ENSG00000160094	-3.33854	0.0988552	0.000213299	0.00111359	8.74014	4.04201	43.1157	180.3	171.345	212.042	ZNF362		NO	NO	NO	NO	0	INHIBIT
ENSG00000162407	-3.33426	0.0991487	1.11e-23	6.85e-22	12.6246	11.1155	34.4925	182.14	195.822	203.114	PLPP3		NO	NO	NO	NO	0	INHIBIT
ENSG00000137766	-3.32618	0.0997057	3.04e-13	6.88e-12	7.76901	3.03151	15.0905	112.227	75.2465	69.1926	UNC13C		NO	NO	NO	NO	0	INHIBIT
ENSG00000087510	-3.32509	0.0997808	4.35e-05	0.00026899	0.971127	0	5.38946	20.2377	22.6646	18.9722	TFAP2C		NO	NO	NO	NO	0	INHIBIT
ENSG00000129757	-3.31964	0.100159	2.39e-08	2.77e-07	3.88451	0	12.9347	53.354	58.0214	53.5685	CDKN1C		NO	NO	NO	NO	0	INHIBIT
ENSG00000162981	-3.27891	0.103027	0.00411673	0.0147574	0	0	6.46735	13.7985	41.7029	5.58005	FAM84A		NO	NO	NO	NO	0	INHIBIT

## Sheet: Top 100 Upregulated (16 genes)
This tab indicates the Top 100 upregulated genes and selection for further analysis via scoring parameters
ID	log2FoldChange	Fold Change	pvalue	padj	LD2-3	LD2-2	LD2-1	Parent-3	Parent-2	Parent-1	Gene.name	Uniprot	Mitotic G2/G2-M Phase	Kinome	Matrsome	Cell Attachment	SCORE	inhbit or actvate?	Druggable?	DRUGS
ENSG00000105639	3.54801	11.6965	1.84e-34	2.5e-32	358.346	324.371	215.578	31.2765	29.0107	15.6241	JAK3	Non-receptor tyrosine kinase involved in various processes such as cell growth, development, or differentiation. Mediates essential signaling events in both innate and adaptive immunity and plays a crucial role in hematopoiesis during T-cells development. In the cytoplasm, plays a pivotal role in signal transduction via its association with type I receptors sharing the common subunit gamma such a…	NO	YES	NO	NO	1	ACTIVATE	YES indirectly	JAK Activators: Apigenin, Emodin
ENSG00000139269	3.80453	13.9727	1.29e-21	6.9e-20	209.763	222.311	103.478	17.478	13.5988	6.69606	INHBE	Inhibins and activins inhibit and activate, respectively, the secretion of follitropin by the pituitary gland. Inhibins/activins are involved in regulating a number of diverse functions such as hypothalamic and pituitary hormone secretion, gonadal hormone secretion, germ cell development and maturation, erythroid differentiation, insulin secretion, nerve cell survival, embryonic axial development…	NO	NO	YES	NO	0.5	ACTIVATE	YES	Recombinant: https://www.novusbio.com/products/inhbe-protein_nbp1-89262pep
ENSG00000166523	3.72927	13.2624	1.31e-51	5.27e-49	1071.15	1068.1	978.725	70.8321	117.856	44.6404	CLEC4E	Calcium-dependent lectin that acts as a pattern recognition receptor (PRR) of the innate immune system: recognizes damage-associated molecular patterns (DAMPs) of abnormal self and pathogen-associated molecular patterns (PAMPs) of bacteria and fungi (PubMed:18509109, PubMed:23602766). The PAMPs notably include mycobacterial trehalose 6,6'-dimycolate (TDM), a cell wall glycolipid with potent adjuv…	NO	NO	YES	NO	0.5	ACTIVATE	YES indirectly	Activated by: trehalose-6,6′-dimycolate AKA "cord factor" https://www.sigmaaldrich.com/US/en/product/sigma/t3034
ENSG00000135925	3.49374	11.2647	1.19e-06	1.04e-05	26.2204	27.2836	23.7136	3.67959	0	3.34803	WNT10A	Ligand for members of the frizzled family of seven transmembrane receptors (Probable). Functions in the canonical Wnt/beta-catenin signaling pathway (By similarity). Plays a role in normal ectoderm development (PubMed:17847007, PubMed:28589954). Required for normal tooth development (PubMed:17847007, PubMed:29178643, PubMed:28589954). Required for normal postnatal development and maintenance of t…	NO	NO	YES	NO	0.5	ACTIVATE	YES	Recombinant: https://www.abcam.com/recombinant-human-wnt10a-protein-ab289784.html ; wnt agonists?
ENSG00000232810	3.26923	9.64134	2.49e-31	2.74e-29	592.387	608.322	803.029	68.0724	102.444	35.7123	TNF	Cytokine that binds to TNFRSF1A/TNFR1 and TNFRSF1B/TNFBR. It is mainly secreted by macrophages and can induce cell death of certain tumor cell lines. It is potent pyrogen causing fever by direct action or by stimulation of interleukin-1 secretion and is implicated in the induction of cachexia, Under certain conditions it can stimulate cell proliferation and induce cell differentiation. Impairs re…	NO	NO	YES	NO	0.5	ACTIVATE	YES	Recombinant: https://www.rndsystems.com/products/recombinant-human-tnf-alpha-protein_210-ta
ENSG00000173918	3.1717	9.01109	2.67e-112	4.52e-108	2699.73	2858.71	2400.46	323.804	323.651	233.246	C1QTNF1	C1QTNF1 (C1q And TNF Related 1) is a Protein Coding gene. Diseases associated with C1QTNF1 include Nonobstructive Coronary Artery Disease and Late-Onset Retinal Degeneration. Gene Ontology (GO) annotations related to this gene include collagen binding. An important paralog of this gene is C1QTNF6.	NO	NO	YES	NO	0.5	ACTIVATE	YES	Recombinant: https://www.novusbio.com/products/recombinant-human-c1qtnf1-protein-cf_9268-tn
ENSG00000157368	3.14322	8.83492	1.25e-11	2.31e-10	68.95	66.6932	43.1157	5.51938	9.97243	4.46404	IL34	Cytokine that promotes the proliferation, survival and differentiation of monocytes and macrophages. Promotes the release of proinflammatory chemokines, and thereby plays an important role in innate immunity and in inflammatory processes. Plays an important role in the regulation of osteoclast proliferation and differentiation, and in the regulation of bone resorption. Signaling via CSF1R and its…	NO	NO	YES	NO	0.5	ACTIVATE	YES	Recombinant: https://www.novusbio.com/products/recombinant-human-il-34-protein_5265-il
ENSG00000169429	3.01169	8.06508	1.54e-39	2.73e-37	3301.83	3216.43	4154.19	405.675	625.544	290.162	CXCL8	IL-8 is a chemotactic factor that attracts neutrophils, basophils, and T-cells, but not monocytes. It is also involved in neutrophil activation. It is released from several cell types in response to an inflammatory stimulus. IL-8(6-77) has a 5-10-fold higher activity on neutrophil activation, IL-8(5-77) has increased activity on neutrophil activation and IL-8(7-77) has a higher affinity to recept…	NO	NO	YES	NO	0.5	ACTIVATE	YES	Recombinant: https://www.rndsystems.com/products/recombinant-human-il-8-cxcl8-protein_208-il
ENSG00000049323	2.89503	7.43859	6.14e-26	4.48e-24	620.55	672.995	323.367	82.7908	77.0597	56.9165	LTBP1	Key regulator of transforming growth factor beta (TGFB1, TGFB2 and TGFB3) that controls TGF-beta activation by maintaining it in a latent state during storage in extracellular space (PubMed:2022183, PubMed:8617200, PubMed:8939931). Associates specifically via disulfide bonds with the Latency-associated peptide (LAP), which is the regulatory chain of TGF-beta, and regulates integrin-dependent acti…	NO	NO	YES	NO	0.5	ACTIVATE	YES	Recombinant: https://www.abcam.com/recombinant-human-ltbp1-protein-ab114738.html
ENSG00000167772	2.80153	6.9718	5.94e-16	1.88e-14	197.139	186.943	172.463	21.1576	45.3292	12.2761	ANGPTL4	Mediates inactivation of the lipoprotein lipase LPL, and thereby plays a role in the regulation of triglyceride clearance from the blood serum and in lipid metabolism (PubMed:19270337, PubMed:21398697, PubMed:27929370, PubMed:29899144). May also play a role in regulating glucose homeostasis and insulin sensitivity (Probable). Inhibits proliferation, migration, and tubule formation of endothelial …	NO	NO	YES	NO	0.5	ACTIVATE	YES	Recombinant: https://www.rndsystems.com/products/recombinant-human-angiopoietin-like-4-protein-cf_4487-an
ENSG00000164400	2.66789	6.355	2.41e-15	7.04e-14	114.593	139.449	223.124	23.9173	32.6371	17.8562	CSF2	Cytokine that stimulates the growth and differentiation of hematopoietic precursor cells from various lineages, including granulocytes, macrophages, eosinophils and erythrocytes.	NO	NO	YES	NO	0.5	ACTIVATE	YES	Recombinant: https://www.rndsystems.com/products/recombinant-human-gm-csf-protein_215-gm
ENSG00000163735	2.5914	6.02682	1.84e-68	2.59e-65	8745.97	8718.61	7864.3	1378.01	1711.63	1110.43	CXCL5	CXCL5 (C-X-C Motif Chemokine Ligand 5) is a Protein Coding gene. Diseases associated with CXCL5 include Nonspecific Interstitial Pneumonia and Pulmonary Sarcoidosis. Among its related pathways are ERK Signaling and Peptide ligand-binding receptors. Gene Ontology (GO) annotations related to this gene include chemokine activity and CXCR chemokine receptor binding. An important paralog of this gene …	NO	NO	YES	NO	0.5	ACTIVATE	YES	Recombinant: https://www.rndsystems.com/products/recombinant-human-cxcl5-ena-78-protein_254-xbhttps://www.rndsystems.com/products/recombinant-human-cxcl5-ena-78-protein_254-xb
ENSG00000115009	2.50758	5.68667	0.00110025	0.00474642	157.323	152.586	143.36	22.0775	51.6753	5.58005	CCL20	Acts as a ligand for C-C chemokine receptor CCR6. Signals through binding and activation of CCR6 and induces a strong chemotactic response and mobilization of intracellular calcium ions (PubMed:11352563, PubMed:11035086, PubMed:20068036). The ligand-receptor pair CCL20-CCR6 is responsible for the chemotaxis of dendritic cells (DC), effector/memory T-cells and B-cells and plays an important role a…	NO	NO	YES	NO	0.5	ACTIVATE	YES	Recombinant: https://www.rndsystems.com/products/recombinant-human-ccl20-mip-3-alpha-protein_360-mp
ENSG00000196878	2.46586	5.52457	1.02e-104	8.61e-101	10236.6	11061	10328.4	1829.68	2209.35	1682.94	LAMB3	Binding to cells via a high affinity receptor, laminin is thought to mediate the attachment, migration and organization of cells into tissues during embryonic development by interacting with other extracellular matrix components.	NO	NO	YES	NO	0.5	ACTIVATE	YES	Recombinant: https://www.abcam.com/recombinant-human-lamb3-protein-ab158811.html
ENSG00000075223	2.35489	5.11556	2.71e-26	2.05e-24	17860	18078.9	9971.57	2985.07	3642.66	2345.85	SEMA3C	Binds to plexin family members and plays an important role in the regulation of developmental processes. Required for normal cardiovascular development during embryogenesis. Functions as attractant for growing axons, and thereby plays an important role in axon growth and axon guidance (By similarity).	NO	NO	YES	NO	0.5	ACTIVATE	YES	Recombinant: https://www.rndsystems.com/products/recombinant-human-semaphorin-3c-fc-chimera-protein-cf_5570-s3
ENSG00000049089	2.28986	4.8901	2.43e-12	4.9e-11	105.853	95.9977	87.3092	11.9587	28.1041	18.9722	COL9A2	COL9A2 (Collagen Type IX Alpha 2 Chain) is a Protein Coding gene. Diseases associated with COL9A2 include Stickler Syndrome, Type V and Epiphyseal Dysplasia, Multiple, 2. Among its related pathways are Integrin Pathway and Phospholipase-C Pathway. Gene Ontology (GO) annotations related to this gene include extracellular matrix structural constituent conferring tensile strength. An important paral…	NO	NO	YES	NO	0.5	ACTIVATE	YES	Recombinant: https://www.novusbio.com/products/collagen-ix-alpha-2-recombinant-protein-antigen_nbp2-30450pep
ENSG00000166396	2.2776	4.84871	6.4e-55	3.28e-52	573.936	531.524	621.943	120.507	130.548	103.789	SERPINB7	Might function as an inhibitor of Lys-specific proteases. Might influence the maturation of megakaryocytes via its action as a serpin.	NO	NO	YES	NO	0.5	ACTIVATE	NO
ENSG00000125144	5.43878	43.3747	7.1e-08	7.6e-07	291.338	318.308	274.862	14.7184	5.43951	0	MT1G		NO	NO	NO	NO	0	ACTIVATE
ENSG00000239911	4.68657	25.7513	1.6e-29	1.52e-27	145.669	139.449	137.97	3.67959	9.97243	2.23202	PRKAG2-AS1		NO	NO	NO	NO	0	ACTIVATE
ENSG00000205358	4.42245	21.4432	6.75e-06	5.02e-05	18.4514	25.2626	18.3242	1.83979	0.906585	0	MT1H		NO	NO	NO	NO	0	ACTIVATE
ENSG00000248587	4.36324	20.581	1.85e-09	2.53e-08	43.7007	51.5356	24.7915	1.83979	1.81317	2.23202	GDNF-AS1		NO	NO	NO	NO	0	ACTIVATE
ENSG00000256292	4.29187	19.5876	8.43e-18	3.17e-16	74.7767	70.7352	100.244	5.51938	5.43951	1.11601	LINC02376		NO	NO	NO	NO	0	ACTIVATE
ENSG00000258072	3.9293	15.2348	1.63e-05	0.000110333	26.2204	18.189	14.0126	1.83979	1.81317	0	AC126177.7		NO	NO	NO	NO	0	ACTIVATE
ENSG00000134545	3.83977	14.3181	2.32e-08	2.7e-07	26.2204	38.3991	32.3367	3.67959	1.81317	1.11601	KLRC1		NO	NO	NO	NO	0	ACTIVATE
ENSG00000085552	3.70111	13.006	1.23e-11	2.28e-10	47.5852	42.4411	60.3619	4.59949	5.43951	1.11601	IGSF9		NO	NO	NO	NO	0	ACTIVATE
ENSG00000232949	3.63685	12.4394	2.51e-08	2.89e-07	37.8739	26.2731	32.3367	1.83979	3.62634	2.23202	AC002480.3		NO	NO	NO	NO	0	ACTIVATE
ENSG00000157680	3.56026	11.7963	2.9e-86	1.46e-82	1386.77	1381.36	972.258	119.587	105.164	91.5128	DGKI		NO	NO	NO	NO	0	ACTIVATE
ENSG00000126561	3.15118	8.88381	1.53e-35	2.28e-33	353.49	307.193	342.769	24.8372	56.2083	31.2483	STAT5A		NO	NO	NO	NO	0	ACTIVATE
ENSG00000267577	3.15115	8.88365	3.1e-05	0.000198834	25.2493	14.147	20.4799	1.83979	3.62634	1.11601	AC010327.3		NO	NO	NO	NO	0	ACTIVATE
ENSG00000101331	3.12343	8.71457	4.63e-18	1.77e-16	288.425	244.542	111.023	21.1576	27.1975	25.6682	CCM2L		NO	NO	NO	NO	0	ACTIVATE
ENSG00000154451	3.11912	8.68856	0.000276482	0.00141096	17.4803	33.3466	7.54524	3.67959	1.81317	1.11601	GBP5		NO	NO	NO	NO	0	ACTIVATE
ENSG00000163661	3.11455	8.66111	1.84e-63	1.48e-60	1077.95	1181.28	1197.54	145.344	163.185	88.1647	PTX3		NO	NO	NO	NO	0	ACTIVATE
ENSG00000114455	3.09375	8.53712	2.39e-07	2.34e-06	32.0472	36.3781	22.6357	3.67959	3.62634	3.34803	HHLA2		NO	NO	NO	NO	0	ACTIVATE
ENSG00000145911	3.08674	8.49577	1.63e-48	5.09e-46	258.32	271.825	284.563	33.1163	36.2634	25.6682	N4BP3		NO	NO	NO	NO	0	ACTIVATE
ENSG00000169688	3.02893	8.16205	0.000191143	0.00100928	32.0472	32.3361	6.46735	4.59949	1.81317	2.23202	MT1B		NO	NO	NO	NO	0	ACTIVATE
ENSG00000172901	3.01247	8.06947	0.000143303	0.00077881	28.1627	13.1365	14.0126	2.75969	0.906585	3.34803	LVRN		NO	NO	NO	NO	0	ACTIVATE
ENSG00000162777	3.01082	8.06023	9.55e-40	1.72e-37	241.811	265.762	217.734	28.5168	36.2634	24.5522	DENND2D		NO	NO	NO	NO	0	ACTIVATE
ENSG00000204335	2.99081	7.9492	1.01e-56	5.71e-54	356.403	396.117	432.234	51.5142	56.2083	40.1763	SP5		NO	NO	NO	NO	0	ACTIVATE
ENSG00000132965	2.98312	7.90696	2.75e-70	4.65e-67	512.755	507.272	577.75	69.9122	77.0597	53.5685	ALOX5AP		NO	NO	NO	NO	0	ACTIVATE
ENSG00000254607	2.97934	7.88624	1.28e-05	8.92e-05	23.307	20.21	32.3367	6.43928	1.81317	1.11601	AP001783.1		NO	NO	NO	NO	0	ACTIVATE
ENSG00000238005	2.97307	7.85206	3.32e-07	3.18e-06	55.3542	60.6301	21.5578	2.75969	8.15926	6.69606	AL391832.2		NO	NO	NO	NO	0	ACTIVATE
ENSG00000162897	2.91028	7.51762	2.18e-18	8.63e-17	271.915	341.55	142.282	28.5168	41.7029	30.1323	FCAMR		NO	NO	NO	NO	0	ACTIVATE
ENSG00000136542	2.90034	7.46603	3.67e-59	2.38e-56	1487.77	1522.83	1082.2	198.698	203.982	143.965	GALNT5		NO	NO	NO	NO	0	ACTIVATE
ENSG00000280587	2.8963	7.44517	5.55e-08	6.03e-07	61.181	39.4096	34.4925	5.51938	9.97243	2.23202	LINC01348		NO	NO	NO	NO	0	ACTIVATE
ENSG00000170231	2.88205	7.37196	5.22e-41	9.91e-39	282.598	250.605	323.367	37.7158	45.3292	32.3643	FABP6		NO	NO	NO	NO	0	ACTIVATE
ENSG00000158125	2.88113	7.36729	8.93e-05	0.000512219	12.6246	18.189	26.9473	1.83979	2.71975	3.34803	XDH		NO	NO	NO	NO	0	ACTIVATE
ENSG00000005981	2.874	7.33095	1.09e-08	1.34e-07	45.6429	50.5251	31.2589	4.59949	8.15926	4.46404	ASB4		NO	NO	NO	NO	0	ACTIVATE
ENSG00000138670	2.83666	7.14365	2.6e-11	4.58e-10	85.4591	76.7982	51.7388	15.6383	6.34609	7.81207	RASGEF1B		NO	NO	NO	NO	0	ACTIVATE
ENSG00000175556	2.69807	6.48931	1.07e-17	4.01e-16	216.561	202.1	115.334	22.0775	34.4502	25.6682	LONRF3		NO	NO	NO	NO	0	ACTIVATE
ENSG00000249867	2.68848	6.44635	1.93e-06	1.61e-05	25.2493	28.2941	28.0252	3.67959	4.53292	4.46404	AC090833.1		NO	NO	NO	NO	0	ACTIVATE
ENSG00000140379	2.66905	6.36012	1.5e-13	3.51e-12	95.1704	87.9137	135.814	11.9587	25.3844	12.2761	BCL2A1		NO	NO	NO	NO	0	ACTIVATE
ENSG00000189221	2.65965	6.31879	3.28e-38	5.49e-36	1043.96	1094.37	679.072	149.023	173.158	122.761	MAOA		NO	NO	NO	NO	0	ACTIVATE
ENSG00000224848	2.65105	6.28123	4.1e-12	8.01e-11	90.3148	69.7247	63.5956	10.1189	17.2251	7.81207	AL589843.1		NO	NO	NO	NO	0	ACTIVATE
ENSG00000229672	2.65039	6.27836	0.0034385	0.0126397	17.4803	10.105	25.8694	7.35918	0.906585	0	AL450322.2		NO	NO	NO	NO	0	ACTIVATE
ENSG00000130475	2.64728	6.26486	8.91e-53	3.77e-50	425.353	443.611	393.43	58.8734	61.6478	82.5847	FCHO1		NO	NO	NO	NO	0	ACTIVATE
ENSG00000158714	2.64518	6.25573	4.17e-49	1.44e-46	362.23	323.361	354.626	46.9148	62.5544	56.9165	SLAMF8		NO	NO	NO	NO	0	ACTIVATE
ENSG00000273172	2.62177	6.15503	0.000226888	0.00117778	15.538	22.2311	26.9473	1.83979	7.25268	1.11601	LINC02091		NO	NO	NO	NO	0	ACTIVATE
ENSG00000232803	2.62093	6.15148	2.19e-07	2.15e-06	132.073	87.9137	31.2589	11.0388	15.4119	14.5081	SLCO4A1-AS1		NO	NO	NO	NO	0	ACTIVATE
ENSG00000137707	2.61925	6.14432	4.35e-06	3.36e-05	21.3648	32.3361	59.284	7.35918	6.34609	4.46404	BTG4		NO	NO	NO	NO	0	ACTIVATE
ENSG00000113494	2.58331	5.99313	2.03e-07	2.01e-06	38.8451	50.5251	53.8946	5.51938	14.5054	3.34803	PRLR		NO	NO	NO	NO	0	ACTIVATE
ENSG00000171872	2.56645	5.92351	0.000506024	0.00239978	21.3648	21.2205	9.70102	2.75969	1.81317	4.46404	KLF17		NO	NO	NO	NO	0	ACTIVATE
ENSG00000230882	2.56421	5.91433	1.18e-12	2.48e-11	100.026	97.0082	64.6735	13.7985	19.9449	10.0441	AC005077.4		NO	NO	NO	NO	0	ACTIVATE
ENSG00000137462	2.52359	5.75012	1.79e-24	1.16e-22	171.889	177.848	149.827	34.9561	29.9173	21.2042	TLR2		NO	NO	NO	NO	0	ACTIVATE
ENSG00000225541	2.5224	5.74536	0.000289193	0.00146917	27.1915	24.2521	9.70102	3.67959	3.62634	3.34803	AC002480.1		NO	NO	NO	NO	0	ACTIVATE
ENSG00000253968	2.51611	5.72037	3.67e-05	0.000230958	35.9317	24.2521	21.5578	7.35918	5.43951	1.11601	AC016573.1		NO	NO	NO	NO	0	ACTIVATE
ENSG00000168309	2.51601	5.71997	0.00075622	0.00341938	36.9028	18.189	11.8568	6.43928	0.906585	4.46404	FAM107A		NO	NO	NO	NO	0	ACTIVATE
ENSG00000141293	2.50844	5.69003	2.3e-55	1.25e-52	799.237	843.769	657.514	142.584	148.68	111.601	SKAP1		NO	NO	NO	NO	0	ACTIVATE
ENSG00000274331	2.48407	5.59475	0.00126227	0.00531646	24.2782	20.21	11.8568	0.919897	1.81317	7.81207	AL355974.1		NO	NO	NO	NO	0	ACTIVATE
ENSG00000272636	2.4788	5.57435	6.55e-12	1.25e-10	77.6901	77.8087	54.9725	12.8786	13.5988	11.1601	DOC2B		NO	NO	NO	NO	0	ACTIVATE
ENSG00000120915	2.4617	5.50867	3.44e-07	3.28e-06	32.0472	51.5356	38.8041	5.51938	10.879	5.58005	EPHX2		NO	NO	NO	NO	0	ACTIVATE
ENSG00000198910	2.45887	5.49786	2.24e-29	2.12e-27	328.241	369.844	271.629	45.9949	74.34	55.8005	L1CAM		NO	NO	NO	NO	0	ACTIVATE
ENSG00000131435	2.45856	5.49669	4.93e-33	6.22e-31	261.233	259.699	228.513	42.3153	55.3017	37.9443	PDLIM4		NO	NO	NO	NO	0	ACTIVATE
ENSG00000185985	2.44859	5.45883	6.71e-27	5.38e-25	1779.1	1803.75	937.766	311.845	263.816	252.218	SLITRK2		NO	NO	NO	NO	0	ACTIVATE
ENSG00000204381	2.44593	5.44877	1.71e-81	4.8e-78	1050.76	1020.61	1112.38	226.295	180.41	176.329	LAYN		NO	NO	NO	NO	0	ACTIVATE
ENSG00000222033	2.3794	5.20322	1.99e-09	2.7e-08	67.0077	60.6301	66.8293	19.3178	11.7856	5.58005	LINC01124		NO	NO	NO	NO	0	ACTIVATE
ENSG00000171522	2.37305	5.18035	4.51e-41	8.66e-39	1159.53	1247.97	916.208	224.455	250.217	165.169	PTGER4		NO	NO	NO	NO	0	ACTIVATE
ENSG00000228208	2.36181	5.14016	0.00140616	0.00583588	11.6535	11.1155	32.3367	3.67959	3.62634	3.34803	C1orf143		NO	NO	NO	NO	0	ACTIVATE
ENSG00000134242	2.33266	5.03735	3.22e-11	5.61e-10	82.5458	82.8612	54.9725	13.7985	14.5054	15.6241	PTPN22		NO	NO	NO	NO	0	ACTIVATE
ENSG00000249992	2.33148	5.03321	1.76e-33	2.26e-31	679.789	721.499	875.248	164.662	179.504	106.021	TMEM158		NO	NO	NO	NO	0	ACTIVATE
ENSG00000234155	2.30968	4.95773	8.57e-11	1.41e-09	104.882	137.428	75.4524	23.9173	27.1975	12.2761	LINC02535		NO	NO	NO	NO	0	ACTIVATE
ENSG00000256234	2.30919	4.95604	1.87e-05	0.000125208	46.6141	39.4096	48.5051	1.83979	16.3185	8.92808	AC022509.2		NO	NO	NO	NO	0	ACTIVATE
ENSG00000162711	2.30743	4.95002	1.45e-12	3e-11	105.853	109.134	102.4	20.2377	31.7305	11.1601	NLRP3		NO	NO	NO	NO	0	ACTIVATE
ENSG00000269220	2.30509	4.94199	3.44e-05	0.000218794	37.8739	38.3991	18.3242	7.35918	8.15926	3.34803	LINC00528		NO	NO	NO	NO	0	ACTIVATE
ENSG00000260001	2.28239	4.86483	4.26e-14	1.08e-12	121.391	125.302	99.166	32.1964	23.5712	14.5081	TGFBR3L		NO	NO	NO	NO	0	ACTIVATE
ENSG00000025708	2.26265	4.79872	2.17e-68	2.83e-65	1081.84	1153.99	1155.5	212.496	277.415	215.39	TYMP		NO	NO	NO	NO	0	ACTIVATE
ENSG00000232759	2.25934	4.78773	5.16e-39	8.99e-37	311.732	292.035	305.043	64.3928	69.807	54.6845	AC002480.2		NO	NO	NO	NO	0	ACTIVATE
ENSG00000258082	2.2542	4.77071	0.00214907	0.00841018	17.4803	24.2521	8.62313	2.75969	5.43951	2.23202	AL391832.3		NO	NO	NO	NO	0	ACTIVATE
ENSG00000227038	2.24877	4.75279	3.21e-05	0.000205083	42.7296	32.3361	24.7915	5.51938	11.7856	3.34803	GTF2IP7		NO	NO	NO	NO	0	ACTIVATE
ENSG00000257067	2.2463	4.74465	3.82e-07	3.62e-06	42.7296	44.4621	32.3367	7.35918	9.97243	7.81207	AP000797.3		NO	NO	NO	NO	0	ACTIVATE
ENSG00000178199	2.24306	4.73401	0.000384452	0.00188567	19.4225	28.2941	16.1684	2.75969	7.25268	3.34803	ZC3H12D		NO	NO	NO	NO	0	ACTIVATE
ENSG00000163347	2.23854	4.7192	1.22e-54	5.91e-52	6568.7	6431.85	5277.36	1322.81	1492.24	1055.74	CLDN1		NO	NO	NO	NO	0	ACTIVATE
ENSG00000266978	2.21965	4.65779	0.000306127	0.00153993	18.4514	24.2521	16.1684	3.67959	4.53292	4.46404	AC011511.2		NO	NO	NO	NO	0	ACTIVATE
ENSG00000181007	2.21449	4.64117	1.04e-13	2.49e-12	102.939	112.166	82.9976	16.5582	24.4778	23.4362	ZFP82		NO	NO	NO	NO	0	ACTIVATE
ENSG00000259459	2.20742	4.61849	0.00322001	0.0119471	27.1915	25.2626	8.62313	3.67959	8.15926	1.11601	LINC02568		NO	NO	NO	NO	0	ACTIVATE
ENSG00000231298	2.20703	4.61724	8.87e-65	8.33e-62	700.182	678.047	789.017	165.582	150.493	152.893	LINC00704		NO	NO	NO	NO	0	ACTIVATE
ENSG00000173432	2.1942	4.57637	3.66e-22	2.01e-20	461.285	466.852	599.308	109.468	147.773	74.7726	SAA1		NO	NO	NO	NO	0	ACTIVATE
ENSG00000137309	2.1942	4.57635	8.56e-28	7.27e-26	953.646	1004.44	977.647	212.496	282.854	143.965	HMGA1		NO	NO	NO	NO	0	ACTIVATE
ENSG00000161921	2.18921	4.56056	9.57e-14	2.31e-12	132.073	172.796	97.0102	31.2765	29.9173	26.7842	CXCL16		NO	NO	NO	NO	0	ACTIVATE
ENSG00000227906	2.17108	4.50361	0.000371595	0.00182738	18.4514	26.2731	16.1684	5.51938	4.53292	3.34803	SNAP25-AS1		NO	NO	NO	NO	0	ACTIVATE
ENSG00000101187	2.17048	4.50173	9.11e-33	1.13e-30	6376.42	6501.57	4097.07	1206.91	1465.95	1097.04	SLCO4A1		NO	NO	NO	NO	0	ACTIVATE

## Sheet: Genes w FOXD115% (4298, 23gene)
This tab indicates genes with predicted FOXD1 binding sites and whether or not binding sites are clustered within 100bp of each other. Genes with more than 2 clustered FOXD1 domains were analyzed for targetability.
ID	log2FoldChange	Fold Change	pvalue	padj	LD2-3	LD2-2	LD2-1	Parent-3	Parent-2	Parent-1	Gene.name	#FOXD1 bndng sites	Clustered sites?
ENSG00000086300	-0.486837	0.713588	1.05e-07	1.09e-06	1290.63	1153.99	1158.73	1701.81	1752.43	1594.78	SNX10	7	YES
ENSG00000137745	-1.41992	0.373732	3.21e-32	3.85e-30	511.784	475.947	624.099	1489.31	1421.53	1398.36	MMP13	6	YES
ENSG00000155666	-0.66653	0.63002	0.00146476	0.00604131	68.95	64.6721	86.2313	116.827	113.323	118.297	KDM8	4	YES
ENSG00000101331	3.12343	8.71457	4.63e-18	1.77e-16	288.425	244.542	111.023	21.1576	27.1975	25.6682	CCM2L	2	YES
ENSG00000078114	-0.925381	0.526542	4.94e-12	9.57e-11	188.399	171.785	191.865	351.401	364.447	331.455	NEBL	8	YES
ENSG00000175395	0.723347	1.65101	0.000330159	0.00164661	855.563	801.328	479.662	436.031	448.76	409.575	ZNF25	6	YES
ENSG00000100823	-0.31702	0.802726	0.0145601	0.0432883	2739.55	2799.09	3733.82	3713.63	3920.98	3914.96	APEX1	5	YES
ENSG00000139192	0.531993	1.44593	3.73e-06	2.94e-05	532.177	574.976	527.089	360.6	360.821	410.691	TAPBPL	5	YES
ENSG00000238005	2.97307	7.85206	3.32e-07	3.18e-06	55.3542	60.6301	21.5578	2.75969	8.15926	6.69606	AL391832.2	5	YES
ENSG00000239893	-0.8854	0.541337	1.25e-05	8.72e-05	76.719	70.7352	78.6861	158.222	124.202	135.037	ZNF736P9Y	4	YES
ENSG00000155363	-0.276149	0.825793	0.000264323	0.00135587	3431.96	3596.38	3483.75	4301.44	3999.85	4430.56	MOV10	4	YES
ENSG00000154639	-3.63311	0.0805983	0.00182813	0.00731165	0.971127	7.07352	38.8041	156.383	221.207	201.998	CXADR	3	YES
ENSG00000137731	-0.956723	0.515226	1.36e-11	2.49e-10	207.821	216.247	185.397	387.277	361.727	436.36	FXYD2	3	YES
ENSG00000141378	-0.444107	0.735039	0.0102425	0.0321663	633.175	531.524	870.936	916.218	976.392	874.951	PTRH2	3	YES
ENSG00000018510	-0.259233	0.835532	0.00732226	0.0241249	6434.68	6281.28	5283.82	7368.38	7143.89	7031.98	AGPS	3	YES
ENSG00000173905	0.329182	1.2563	0.000742448	0.00336371	5289.73	5256.63	4378.39	3972.12	4042.46	3865.86	GOLIM4	3	YES
ENSG00000223960	0.535366	1.44931	4.81e-05	0.000295338	823.515	723.52	673.682	539.06	547.577	444.172	AC009948.1	3	YES
ENSG00000105717	1.0473	2.06666	1.79e-17	6.56e-16	444.776	410.264	416.066	203.297	207.608	204.23	PBX4	3	YES
ENSG00000256234	2.30919	4.95604	1.87e-05	0.000125208	46.6141	39.4096	48.5051	1.83979	16.3185	8.92808	AC022509.2	3	YES
ENSG00000166106	-2.01687	0.247093	2.31e-27	1.91e-25	147.611	239.489	253.304	886.781	803.234	898.388	ADAMTS15	2	YES
ENSG00000104341	0.208247	1.15528	0.0007483	0.0033881	15130.2	15459.7	16113.4	13576.8	13426.5	13421.1	LAPTM4B	2	YES
ENSG00000142733	0.24012	1.18109	0.00704155	0.0233228	1461.55	1579.42	1478.87	1219.78	1245.65	1363.76	MAP3K6	2	YES
ENSG00000165512	1.61502	3.06315	1.23e-18	5.03e-17	582.676	637.627	534.634	149.943	243.871	178.562	ZNF22	2	YES
ENSG00000003147	-3.04089	0.121507	2.04e-22	1.16e-20	17.4803	10.105	29.1031	137.985	161.372	164.053	ICA1	1	NO
ENSG00000231652	-2.11081	0.231517	0.00167844	0.0067917	2.91338	6.06301	3.23367	23.9173	16.3185	12.2761	AL590428.1	1	NO
ENSG00000237523	-1.2577	0.41821	0.000975603	0.00425759	10.6824	20.21	22.6357	41.3954	43.5161	42.4084	LINC00857	1	NO
ENSG00000178691	-0.526182	0.69439	2.45e-13	5.6e-12	2238.45	2303.95	2206.44	3260.12	3338.05	3119.25	SUZ12	1	NO
ENSG00000157796	-0.483746	0.715118	0.00729113	0.0240682	768.161	676.026	453.792	842.626	863.975	949.724	WDR19	1	NO
ENSG00000120708	-0.29554	0.814768	2.33e-06	1.91e-05	111271	116432	114772	141427	135248	143661	TGFBI	1	NO
ENSG00000166321	0.328886	1.25604	0.0138597	0.0415128	300.078	273.846	297.498	215.256	241.152	237.71	NUDT13	1	NO
ENSG00000197977	0.453524	1.36938	0.000682986	0.00312671	802.151	823.559	637.034	597.013	538.511	516.712	ELOVL2	1	NO
ENSG00000237036	0.57612	1.49083	0.00689326	0.0229237	266.089	290.014	173.541	154.543	154.119	181.91	ZEB1-AS1	1	NO
ENSG00000117143	0.844051	1.79508	1.52e-34	2.1e-32	4882.82	4847.38	4911.95	2725.66	2819.48	2609.23	UAP1	1	NO
ENSG00000227986	1.14583	2.21273	0.000366007	0.001802	86.4303	58.6091	74.3745	45.075	29.0107	24.5522	TRIM60P18	1	NO
ENSG00000171872	2.56645	5.92351	0.000506024	0.00239978	21.3648	21.2205	9.70102	2.75969	1.81317	4.46404	KLF17	1	NO
ENSG00000081052	-3.89858	0.0670517	4.31e-10	6.49e-09	1.94225	3.03151	3.23367	37.7158	36.2634	47.9884	COL4A4	1	NO
ENSG00000188153	-3.58271	0.0834638	1.96e-05	0.000130686	16.5092	14.147	93.7766	472.827	497.715	517.828	COL4A5	1	NO
ENSG00000151388	-3.58232	0.0834864	1.29e-08	1.57e-07	0.971127	1.0105	12.9347	64.3928	56.2083	53.5685	ADAMTS12	1	NO
ENSG00000168961	-3.54515	0.0856653	5.65e-07	5.23e-06	0.971127	0	9.70102	43.2352	34.4502	43.5244	LGALS9	1	NO
ENSG00000225968	-3.414	0.0938175	0.00176663	0.00709592	18.4514	20.21	220.968	924.497	841.311	999.944	ELFN1	1	NO
ENSG00000164161	-3.37713	0.0962457	1.24e-11	2.29e-10	3.88451	4.04201	23.7136	114.067	102.444	107.137	HHIP	1	NO
ENSG00000163993	-3.31208	0.100685	0.0085264	0.0275815	0.971127	0	4.31157	3.67959	44.4227	3.34803	S100P	1	NO
ENSG00000049089	2.28986	4.8901	2.43e-12	4.9e-11	105.853	95.9977	87.3092	11.9587	28.1041	18.9722	COL9A2	1	NO
ENSG00000075223	2.35489	5.11556	2.71e-26	2.05e-24	17860	18078.9	9971.57	2985.07	3642.66	2345.85	SEMA3C	1	NO
ENSG00000196878	2.46586	5.52457	1.02e-104	8.61e-101	10236.6	11061	10328.4	1829.68	2209.35	1682.94	LAMB3	1	NO
ENSG00000115009	2.50758	5.68667	0.00110025	0.00474642	157.323	152.586	143.36	22.0775	51.6753	5.58005	CCL20	1	NO
ENSG00000163735	2.5914	6.02682	1.84e-68	2.59e-65	8745.97	8718.61	7864.3	1378.01	1711.63	1110.43	CXCL5	1	NO
ENSG00000167772	2.80153	6.9718	5.94e-16	1.88e-14	197.139	186.943	172.463	21.1576	45.3292	12.2761	ANGPTL4	1	NO
ENSG00000049323	2.89503	7.43859	6.14e-26	4.48e-24	620.55	672.995	323.367	82.7908	77.0597	56.9165	LTBP1	1	NO
ENSG00000169429	3.01169	8.06508	1.54e-39	2.73e-37	3301.83	3216.43	4154.19	405.675	625.544	290.162	CXCL8	1	NO
ENSG00000157368	3.14322	8.83492	1.25e-11	2.31e-10	68.95	66.6932	43.1157	5.51938	9.97243	4.46404	IL34	1	NO
ENSG00000135925	3.49374	11.2647	1.19e-06	1.04e-05	26.2204	27.2836	23.7136	3.67959	0	3.34803	WNT10A	1	NO
ENSG00000105639	3.54801	11.6965	1.84e-34	2.5e-32	358.346	324.371	215.578	31.2765	29.0107	15.6241	JAK3	1	NO
ENSG00000166523	3.72927	13.2624	1.31e-51	5.27e-49	1071.15	1068.1	978.725	70.8321	117.856	44.6404	CLEC4E	1	NO
ENSG00000134202	-1.34446	0.393802	1.98e-15	5.81e-14	205.879	177.848	281.33	562.057	562.989	561.353	GSTM3	6	NO
ENSG00000178996	-1.06229	0.478873	1.02e-14	2.73e-13	152.467	146.523	145.515	305.406	311.865	311.367	SNX18	6	NO
ENSG00000115380	-0.86372	0.549534	1.9e-19	8.57e-18	543.831	567.902	612.242	1034.88	1079.74	1020.03	EFEMP1	6	NO
ENSG00000171033	0.67528	1.59691	6.21e-09	7.85e-08	1345.98	1258.08	1082.2	738.678	828.619	741.03	PKIA	6	NO
ENSG00000256894	0.96437	1.95121	0.000389261	0.00190594	131.102	173.806	91.6208	59.7933	67.0873	77.0046	AC022509.3	6	NO
ENSG00000183729	-4.11349	0.0577718	5.03e-06	3.84e-05	0	0	4.31157	22.9974	28.1041	20.0882	NPBWR1	5	NO
ENSG00000133106	-1.80221	0.286734	0.00270501	0.0102765	4.85563	7.07352	5.38946	16.5582	29.0107	14.5081	EPSTI1	5	NO
ENSG00000100600	-0.831709	0.561863	9.45e-14	2.29e-12	1441.15	1496.55	1842.12	2801.09	2787.75	2916.13	LGMN	5	NO
ENSG00000166086	-0.664527	0.630896	0.0137657	0.0412898	34.9606	38.3991	44.1935	57.9535	63.4609	64.7285	JAM3	5	NO
ENSG00000265972	-0.420683	0.747071	0.00052619	0.00248219	1147.87	1073.15	865.547	1329.25	1390.7	1413.98	TXNIP	5	NO
ENSG00000169981	-0.407889	0.753725	0.0151319	0.0446977	166.063	165.722	222.046	252.972	250.217	229.898	ZNF35	5	NO
ENSG00000174695	-0.255632	0.83762	0.000394425	0.0019289	2208.34	2073.55	2174.11	2540.76	2627.28	2538.92	TMEM167A	5	NO
ENSG00000137601	0.376693	1.29836	0.000718735	0.00326737	1418.82	1406.62	1145.8	1005.45	1051.64	1002.18	NEK1	5	NO
ENSG00000148834	0.397819	1.31751	0.000672249	0.00308424	3064.88	3106.28	3912.75	2549.04	2680.77	2421.74	GSTO1	5	NO
ENSG00000281332	0.443824	1.3602	0.00134009	0.00560509	356.403	317.298	358.938	259.411	273.789	224.318	LINC00997	5	NO
ENSG00000154080	-3.36169	0.0972816	4.27e-07	4e-06	14.5669	14.147	60.3619	304.486	318.211	290.162	CHST9	4	NO
ENSG00000121316	-3.01251	0.123921	0.00376351	0.0136562	0	1.0105	7.54524	4.59949	40.7963	22.3202	PLBD1	4	NO
ENSG00000197724	-0.269548	0.82958	0.0148657	0.0440499	1857.77	1773.43	1464.85	2047.69	1966.38	2131.58	PHF2	4	NO
ENSG00000147164	-0.252259	0.839581	0.000948273	0.00415657	2263.7	2362.55	2512.56	2871	2807.69	2822.39	SNX12	4	NO
ENSG00000068697	0.233012	1.17529	0.000311519	0.00156379	10791.2	10312.2	10911.5	9196.21	9211.81	8829.87	LAPTM4A	4	NO
ENSG00000235954	0.331762	1.25855	0.00126206	0.00531646	510.813	527.482	543.257	422.233	419.749	414.039	TTC28-AS1	4	NO
ENSG00000240476	0.56528	1.47967	2.36e-08	2.74e-07	730.287	743.73	732.966	491.225	532.165	466.492	LINC00973	4	NO
ENSG00000129521	1.04258	2.05991	3.15e-11	5.51e-10	6428.86	6667.29	4288.93	2817.65	2840.33	2782.21	EGLN3	4	NO
ENSG00000107731	1.33965	2.53089	4.03e-13	8.94e-12	226.272	266.773	237.136	97.5091	111.51	78.1207	UNC5B	4	NO
ENSG00000279138	1.4497	2.73151	0.00266951	0.010153	26.2204	19.1995	34.4925	11.0388	8.15926	10.0441	AP002847.1	4	NO
ENSG00000182168	-2.50392	0.176297	3.22e-06	2.57e-05	3.88451	3.03151	11.8568	36.7959	33.5436	34.5963	UNC5C	3	NO
ENSG00000248890	-2.23421	0.212537	0.000999691	0.00435372	3.88451	6.06301	1.07789	17.478	18.1317	16.7401	HHIP-AS1	3	NO
ENSG00000146409	-1.57098	0.336579	5.57e-10	8.24e-09	70.8922	52.5461	102.4	183.979	255.657	229.898	SLC18B1	3	NO
ENSG00000271533	-1.42229	0.373119	5.42e-05	0.000328574	18.4514	31.3256	18.3242	69.9122	47.1424	65.8446	Z83843.1	3	NO
ENSG00000133863	-1.40187	0.378439	3.87e-18	1.49e-16	92.257	120.25	114.256	291.607	289.201	281.234	TEX15	3	NO
ENSG00000169122	-1.15813	0.448092	6.15e-08	6.64e-07	63.1232	48.5041	66.8293	131.545	137.801	128.341	FAM110B	3	NO
ENSG00000109762	-0.655197	0.634989	2.01e-08	2.36e-07	299.107	327.403	307.199	464.548	485.93	521.176	SNX25	3	NO
ENSG00000175970	-0.582858	0.66764	6.81e-13	1.47e-11	1405.22	1269.19	1336.59	2017.33	2038	1951.9	UNC119B	3	NO
ENSG00000085511	-0.553275	0.681471	9.09e-10	1.3e-08	1728.61	1871.45	1642.71	2656.66	2406.98	2631.55	MAP3K4	3	NO
ENSG00000107036	-0.507978	0.703207	0.000880045	0.00390407	1255.67	1155	838.6	1618.1	1413.37	1591.43	RIC1	3	NO
ENSG00000189057	-0.386447	0.765012	4e-06	3.12e-05	1208.08	1133.78	1225.56	1619.94	1505.84	1536.74	FAM111B	3	NO
ENSG00000055332	-0.340766	0.789622	0.000362129	0.00178498	4131.17	4052.11	3414.76	4964.69	4908.25	4816.7	EIF2AK2	3	NO
ENSG00000198538	-0.331632	0.794637	0.00354673	0.0129755	415.642	402.18	386.963	513.303	466.891	537.917	ZNF28	3	NO
ENSG00000092964	-0.245281	0.843652	0.00395633	0.0142701	945.877	895.305	904.351	1072.6	1059.8	1123.82	DPYSL2	3	NO
ENSG00000161813	-0.222326	0.857182	0.00374466	0.0136083	2649.23	2601.03	2448.97	3056.82	3060.63	2863.68	LARP4	3	NO
ENSG00000277586	-0.200043	0.870525	0.0017372	0.00699266	10016.2	10166.7	10687.3	11996.4	11654.1	11809.6	NEFL	3	NO
ENSG00000153130	0.241969	1.18261	0.0117086	0.0360866	1926.72	1851.24	1813.01	1638.34	1672.65	1413.98	SCOC	3	NO
ENSG00000175040	0.302675	1.23343	0.00886677	0.0285459	524.408	638.637	589.607	469.148	481.397	469.84	CHST2	3	NO
ENSG00000198399	0.369928	1.29229	0.00122476	0.00518949	3080.41	3015.34	2406.93	2184.76	2289.13	2105.91	ITSN2	3	NO
ENSG00000215717	0.451928	1.36787	1.07e-06	9.43e-06	2353.04	2229.17	2008.11	1603.38	1665.4	1549.02	TMEM167B	3	NO
ENSG00000146386	0.471449	1.3865	0.00020775	0.00108779	1721.81	1770.4	2256.03	1414.8	1448.72	1280.06	ABRACL	3	NO
ENSG00000183340	0.580024	1.49487	0.000263412	0.00135239	997.347	980.187	696.318	587.814	658.181	542.381	JRKL	3	NO
ENSG00000163874	0.686817	1.60973	2.42e-09	3.25e-08	1163.41	1112.56	1112.38	618.171	792.355	694.158	ZC3H12A	3	NO
ENSG00000187546	1.34561	2.54138	0.000186811	0.000989184	55.3542	72.7562	38.8041	22.0775	24.4778	18.9722	AGMO	3	NO
ENSG00000185630	-3.34777	0.0982249	0.00290925	0.0109291	0.971127	8.08402	36.6483	131.545	174.971	157.357	PBX1	2	NO
ENSG00000150551	-2.81822	0.141785	6.6e-07	6.03e-06	43.7007	46.4831	147.671	585.055	551.204	539.033	LYPD1	2	NO
ENSG00000113763	-2.51428	0.175035	4.39e-05	0.00027104	2.91338	2.021	16.1684	36.7959	41.7029	40.1763	UNC5A	2	NO
ENSG00000123342	-1.91603	0.264983	0.00260498	0.00994563	3.88451	6.06301	3.23367	13.7985	17.2251	18.9722	MMP19	2	NO
ENSG00000136010	-1.85202	0.277005	3.01e-14	7.78e-13	32.0472	29.3046	42.0378	119.587	123.296	129.457	ALDH1L2	2	NO
ENSG00000253507	-1.18734	0.439113	0.001153	0.00492869	24.2782	39.4096	16.1684	68.9923	49.8622	63.6125	AC104257.1	2	NO
ENSG00000160323	-0.880114	0.543324	7.94e-05	0.000461499	65.0655	77.8087	59.284	116.827	111.51	145.081	ADAMTS13	2	NO
ENSG00000168661	-0.862669	0.549934	0.00391901	0.0141446	41.7584	34.3571	28.0252	71.752	66.1807	51.3364	ZNF30	2	NO
ENSG00000134874	-0.789999	0.578345	6.4e-13	1.39e-11	340.865	365.802	330.913	609.892	569.335	616.037	DZIP1	2	NO
ENSG00000185722	-0.782121	0.581511	1.31e-26	1.02e-24	1712.1	1650.15	1615.76	2841.56	2787.75	2933.99	ANKFY1	2	NO
ENSG00000186834	-0.720525	0.606876	1.83e-07	1.82e-06	1411.05	1441.99	1968.23	2632.75	2541.16	2768.82	HEXIM1	2	NO
ENSG00000168517	-0.706491	0.612809	0.00234513	0.00907659	59.2387	60.6301	54.9725	80.951	97.0046	108.253	HEXIM2	2	NO
ENSG00000108861	-0.671926	0.627668	1.33e-08	1.61e-07	1418.82	1351.04	1764.51	2508.56	2321.76	2391.61	DUSP3	2	NO
ENSG00000167112	-0.593903	0.662548	0.000130462	0.000717096	1068.24	1107.51	1602.82	1889.47	1936.47	1874.9	TRUB2	2	NO
ENSG00000168734	-0.554189	0.68104	9.63e-06	6.91e-05	517.61	546.682	647.813	907.939	775.13	829.195	PKIG	2	NO
ENSG00000071189	-0.547865	0.684032	8.71e-07	7.77e-06	1457.66	1433.9	1149.03	1971.34	1938.28	1999.89	SNX13	2	NO
ENSG00000234616	-0.489453	0.712295	3.69e-09	4.81e-08	1190.6	1189.36	1155.5	1592.34	1621.88	1752.13	JRK	2	NO
ENSG00000144040	-0.459114	0.727433	8.19e-06	5.97e-05	832.255	755.856	914.052	1185.75	1118.73	1133.87	SFXN5	2	NO
ENSG00000198429	-0.451629	0.731217	0.000107875	0.000604301	340.865	380.959	333.068	503.184	464.171	475.42	ZNF69	2	NO
ENSG00000167196	-0.43099	0.741753	2.71e-06	2.19e-05	1077.95	1105.49	1242.81	1574.86	1538.47	1503.26	FBXO22	2	NO
ENSG00000080345	-0.3452	0.787199	0.00301323	0.0112726	6095.76	5597.17	4653.26	7200.04	7153.86	6411.47	RIF1	2	NO
ENSG00000111144	-0.309808	0.806749	0.000159131	0.0008563	1384.83	1371.25	1288.08	1636.5	1632.76	1746.55	LTA4H	2	NO
ENSG00000134748	-0.279885	0.823657	0.0016119	0.00655748	2219.02	2333.25	2616.04	2874.68	2913.76	2912.78	PRPF38A	2	NO
ENSG00000187742	-0.220469	0.858286	0.00315531	0.0117314	1378.03	1329.82	1380.78	1605.22	1586.52	1571.34	SECISBP2	2	NO
ENSG00000105939	-0.204449	0.86787	0.00134218	0.00560968	4910.99	4927.21	4690.98	5523.98	5601.79	5616.88	ZC3HAV1	2	NO
ENSG00000116171	0.199834	1.14857	0.00360251	0.0131568	3419.34	3461.98	3567.82	2988.75	3129.53	2977.51	SCP2	2	NO
ENSG00000186716	0.204136	1.152	0.00343676	0.0126371	2778.39	2945.61	2813.3	2480.96	2435.09	2495.4	BCR	2	NO
ENSG00000168092	0.211843	1.15817	0.00430702	0.0153491	5717.99	5791.19	5257.95	4818.42	4943.61	4715.14	PAFAH1B2	2	NO
ENSG00000148925	0.225814	1.16944	0.00624611	0.0210932	1827.66	1893.68	1687.98	1531.63	1561.14	1533.4	BTBD10	2	NO
ENSG00000141858	0.234915	1.17684	0.0121368	0.0371894	2486.08	2592.95	2856.41	2355.86	2092.4	2294.52	SAMD1	2	NO
ENSG00000105176	0.313223	1.24248	6.35e-06	4.75e-05	3077.5	3113.36	3179.78	2565.59	2546.6	2427.32	URI1	2	NO
ENSG00000166002	0.36762	1.29022	0.00112923	0.00484546	493.332	524.451	551.88	420.393	417.029	377.211	SMCO4	2	NO
ENSG00000143543	0.398455	1.3181	0.000848433	0.00377672	3998.13	4075.36	5257.95	3395.34	3376.12	3341.33	JTB	2	NO
ENSG00000111450	0.4102	1.32887	1.08e-06	9.45e-06	2044.22	2013.93	1828.1	1483.79	1504.93	1440.77	STX2	2	NO
ENSG00000134046	0.41926	1.33724	3.01e-07	2.92e-06	3354.27	3385.18	3715.49	2664.94	2666.27	2484.24	MBD2	2	NO
ENSG00000251022	0.446788	1.363	4.67e-06	3.59e-05	1639.26	1542.03	1380.78	1129.63	1140.48	1076.95	THAP9-AS1	2	NO
ENSG00000189046	0.466002	1.38128	0.00143237	0.00592364	403.989	448.663	552.958	331.163	334.53	351.543	ALKBH2	2	NO
ENSG00000151136	0.600468	1.51621	1.29e-06	1.12e-05	724.46	781.118	611.164	451.67	467.798	477.652	BTBD11	2	NO
ENSG00000065911	0.859696	1.81466	4.32e-15	1.22e-13	11835.1	12082.6	9640.66	6268.18	6467.58	5756.38	MTHFD2	2	NO
ENSG00000106336	0.8698	1.82741	0.0152908	0.0450959	40.7873	47.4936	34.4925	16.5582	26.291	24.5522	FBXO24	2	NO
ENSG00000198521	0.914409	1.8848	1.72e-08	2.04e-07	225.301	206.142	213.422	111.308	124.202	106.021	ZNF43	2	NO
ENSG00000007402	0.974711	1.96525	0.000172432	0.000920837	91.2859	79.8297	80.8419	43.2352	50.7688	33.4803	CACNA2D2	2	NO
ENSG00000166145	1.0292	2.04089	4.57e-10	6.86e-09	241.811	263.741	220.968	106.708	126.922	122.761	SPINT1	2	NO
ENSG00000147119	1.20321	2.30251	4.73e-24	2.99e-22	700.182	704.32	815.964	341.282	311.865	310.251	CHST7	2	NO
ENSG00000138152	1.27601	2.42169	8.61e-05	0.000496092	72.8345	55.5776	49.583	22.0775	29.0107	22.3202	BTBD16	2	NO
ENSG00000168209	1.71677	3.287	4.17e-26	3.11e-24	36023	37783.7	23671.6	9544.85	10472	9638.97	DDIT4	2	NO
ENSG00000206337	1.7891	3.45599	6.88e-07	6.27e-06	96.1415	123.281	61.4398	31.2765	32.6371	16.7401	HCP5	2	NO
ENSG00000258082	2.2542	4.77071	0.00214907	0.00841018	17.4803	24.2521	8.62313	2.75969	5.43951	2.23202	AL391832.3	2	NO
ENSG00000169903	-6.24787	0.0131584	1.02e-05	7.27e-05	0	0	1.07789	11.0388	60.7412	11.1601	TM4SF4	1	NO
ENSG00000056487	-4.922	0.0329861	2.46e-07	2.41e-06	0	0	3.23367	23.9173	38.0766	31.2483	PHF21B	1	NO
ENSG00000112796	-4.6837	0.0389103	1.67e-06	1.4e-05	0	0	3.23367	34.9561	21.758	22.3202	ENPP5	1	NO
ENSG00000183549	-4.52324	0.0434879	1.68e-17	6.15e-16	2.91338	0	9.70102	79.1112	91.5651	112.717	ACSM5	1	NO
ENSG00000107485	-4.5197	0.0435947	1.81e-08	2.14e-07	0	0	5.38946	42.3153	28.1041	47.9884	GATA3	1	NO
ENSG00000023171	-4.47717	0.044899	4.95e-05	0.000302385	0	0	3.23367	9.19897	40.7963	18.9722	GRAMD1B	1	NO
ENSG00000147481	-4.42634	0.0465093	0.00610452	0.020702	0	0	8.62313	54.2739	63.4609	65.8446	SNTG1	1	NO
ENSG00000268460	-4.3819	0.0479642	5.73e-11	9.7e-10	0.971127	0	6.46735	47.8347	57.1148	44.6404	AC006262.1	1	NO
ENSG00000055732	-4.34414	0.0492362	0.000828541	0.00369987	0	1.0105	11.8568	75.4316	89.7519	93.7448	MCOLN3	1	NO
ENSG00000123453	-4.31282	0.0503168	0.00730353	0.024082	0.971127	0	23.7136	171.101	145.96	171.865	SARDH	1	NO
ENSG00000268621	-4.29401	0.0509772	0.000944462	0.00414308	0	1.0105	11.8568	83.7107	91.5651	74.7726	IGFL2-AS1	1	NO
ENSG00000144857	-4.26292	0.0520875	3.79e-15	1.08e-13	2.91338	0	8.62313	73.5918	67.9939	74.7726	BOC	1	NO
ENSG00000138759	-4.23294	0.0531813	0.0154822	0.0455571	0	0	10.7789	72.6719	61.6478	66.9606	FRAS1	1	NO
ENSG00000096696	-4.18919	0.0548188	0.00512928	0.0178422	0	2.021	6.46735	15.6383	123.296	14.5081	DSP	1	NO
ENSG00000169515	-4.13351	0.0569756	0.00647	0.0217494	0	0	7.54524	43.2352	46.2358	41.2923	CCDC8	1	NO
ENSG00000176049	-4.12124	0.0574621	0.00225005	0.00874865	0	1.0105	12.9347	69.9122	91.5651	79.2367	JAKMIP2	1	NO
ENSG00000173930	-4.10678	0.0580412	0.00095678	0.0041895	0.971127	0	10.7789	58.8734	73.4334	68.0766	SLCO4C1	1	NO
ENSG00000150893	-4.07769	0.0592233	0.00505602	0.0176381	0	1.0105	16.1684	108.548	96.098	83.7007	FREM2	1	NO
ENSG00000141447	-4.05272	0.0602574	8.87e-05	0.000509348	0	0	5.38946	23.9173	53.4885	8.92808	OSBPL1A	1	NO
ENSG00000145284	-4.0485	0.0604337	1.75e-07	1.75e-06	0	0	6.46735	36.7959	34.4502	31.2483	SCD5	1	NO
ENSG00000134755	-4.00035	0.0624848	0.00793095	0.0258682	1.94225	0	23.7136	114.067	191.289	103.789	DSC2	1	NO
ENSG00000146122	-3.99777	0.0625965	0.00566509	0.0194261	0	2.021	21.5578	122.346	108.79	143.965	DAAM2	1	NO
ENSG00000116729	-3.98575	0.0631202	0.00873601	0.0281679	0.971127	4.04201	93.7766	514.223	520.38	528.988	WLS	1	NO
ENSG00000197444	-3.97777	0.0634705	0.00158875	0.00647998	1.94225	3.03151	48.5051	267.69	259.283	313.599	OGDHL	1	NO
ENSG00000099864	-3.97719	0.0634959	0.00975378	0.0308781	0	0	7.54524	35.876	33.5436	47.9884	PALM	1	NO
ENSG00000116711	-3.96005	0.0642548	6.2e-07	5.7e-06	0.971127	1.0105	7.54524	27.5969	91.5651	25.6682	PLA2G4A	1	NO
ENSG00000234323	-3.91612	0.0662417	4.85e-05	0.000297253	0	0	4.31157	30.3566	16.3185	15.6241	LINC01505	1	NO
ENSG00000112655	-3.89634	0.0671559	0.0074161	0.0244198	0.971127	6.06301	90.5429	463.628	496.809	491.044	PTK7	1	NO
ENSG00000120162	-3.88512	0.0676801	0.000151421	0.000820556	0	0	4.31157	31.2765	20.8515	8.92808	MOB3B	1	NO
ENSG00000198914	-3.87619	0.0681006	0.00219976	0.00859066	0.971127	1.0105	22.6357	123.266	116.949	119.413	POU3F3	1	NO
ENSG00000111052	-3.86165	0.0687905	3.57e-21	1.83e-19	4.85563	5.05251	11.8568	87.3902	113.323	111.601	LIN7A	1	NO
ENSG00000158220	-3.84689	0.0694978	2.31e-08	2.69e-07	0	2.021	5.38946	33.1163	33.5436	36.8283	ESYT3	1	NO
ENSG00000262995	-3.83669	0.0699908	1.77e-05	0.000118699	0.971127	1.0105	2.15578	13.7985	24.4778	20.0882	AC137056.1	1	NO
ENSG00000104369	-3.82481	0.0705697	9.4e-12	1.77e-10	1.94225	1.0105	10.7789	68.0724	68.9005	52.4524	JPH1	1	NO
ENSG00000171004	-3.78297	0.0726459	0.014694	0.0436301	0	2.021	26.9473	104.868	177.691	114.949	HS6ST2	1	NO
ENSG00000186529	-3.76687	0.0734616	1.2e-06	1.04e-05	0.971127	1.0105	4.31157	31.2765	35.3568	16.7401	CYP4F3	1	NO
ENSG00000198108	-3.76324	0.0736462	7.69e-14	1.88e-12	3.88451	1.0105	12.9347	87.3902	81.5926	68.0766	CHSY3	1	NO
ENSG00000199488	-3.75639	0.0739969	8.99e-07	8e-06	0	1.0105	5.38946	31.2765	25.3844	26.7842	RNU1-70P	1	NO
ENSG00000005249	-3.72908	0.0754112	2.81e-05	0.000180587	4.85563	5.05251	36.6483	205.137	207.608	201.998	PRKAR2B	1	NO
ENSG00000105426	-3.70208	0.0768356	0.0166535	0.0484441	0.971127	2.021	72.2187	289.768	292.827	395.067	PTPRS	1	NO
ENSG00000125848	-3.68589	0.0777026	4.98e-07	4.65e-06	0.971127	0	6.46735	32.1964	27.1975	33.4803	FLRT3	1	NO
ENSG00000067606	-3.68296	0.0778609	0.00297092	0.011134	1.94225	0	14.0126	78.1913	61.6478	63.6125	PRKCZ	1	NO
ENSG00000018236	-3.65873	0.0791793	0.0164746	0.0480424	0.971127	0	18.3242	69.9122	107.884	64.7285	CNTN1	1	NO
ENSG00000173156	-3.65531	0.0793674	0.0103184	0.0323446	0	1.0105	15.0905	66.2326	76.1531	59.1485	RHOD	1	NO
ENSG00000109819	-3.63699	0.0803818	6.65e-05	0.000394537	5.82676	11.1155	59.284	321.964	299.173	324.759	PPARGC1A	1	NO
ENSG00000071575	-3.62355	0.0811342	1.63e-10	2.59e-09	0.971127	2.021	10.7789	57.0336	53.4885	54.6845	TRIB2	1	NO
ENSG00000224417	-3.61726	0.0814886	1.16e-11	2.15e-10	1.94225	3.03151	18.3242	89.23	85.219	106.021	AL606970.1	1	NO
ENSG00000064655	-3.60747	0.0820433	2.71e-05	0.000175305	0	0	6.46735	31.2765	24.4778	20.0882	EYA2	1	NO
ENSG00000113532	-3.60383	0.0822508	2.51e-06	2.04e-05	1.94225	0	6.46735	23.9173	52.5819	23.4362	ST8SIA4	1	NO
ENSG00000198807	-3.5836	0.0834121	2.33e-06	1.91e-05	0.971127	0	9.70102	30.3566	34.4502	60.2645	PAX9	1	NO
ENSG00000170412	-3.56846	0.0842918	3.66e-15	1.04e-13	6.79789	4.04201	25.8694	126.946	168.625	133.921	GPRC5C	1	NO
ENSG00000003137	-3.55151	0.085288	0.000347998	0.00172287	4.85563	1.0105	22.6357	114.987	106.977	110.485	CYP26B1	1	NO
ENSG00000147234	-3.53069	0.0865282	0.0107733	0.0335526	2.91338	0	22.6357	105.788	87.9387	100.441	FRMPD3	1	NO
ENSG00000138271	-3.52299	0.0869912	2.55e-05	0.000165646	2.91338	0	3.23367	13.7985	19.0383	37.9443	GPR87	1	NO
ENSG00000134321	-3.46585	0.0905058	6.49e-09	8.19e-08	3.88451	0	12.9347	62.553	70.7136	49.1044	RSAD2	1	NO
ENSG00000012504	-3.46327	0.0906678	1.52e-06	1.29e-05	0	1.0105	10.7789	46.9148	37.17	42.4084	NR1H4	1	NO
ENSG00000179277	-3.44148	0.0920476	0.0106359	0.033203	0	1.0105	12.9347	50.5944	51.6753	47.9884	MEIS3P1	1	NO
ENSG00000158321	-3.43994	0.0921454	0.0129487	0.0391658	5.82676	0	30.181	133.385	131.455	124.993	AUTS2	1	NO
ENSG00000130234	-3.43537	0.0924379	1.13e-06	9.85e-06	1.94225	1.0105	4.31157	23.9173	23.5712	30.1323	ACE2	1	NO
ENSG00000143845	-3.42891	0.0928531	1.75e-11	3.16e-10	2.91338	5.05251	24.7915	119.587	120.576	107.137	ETNK2	1	NO
ENSG00000177570	-3.42242	0.0932718	0.0032785	0.0121414	6.79789	1.0105	39.882	171.101	165.905	172.981	SAMD12	1	NO
ENSG00000146530	-3.39235	0.0952361	0.00944548	0.0300768	1.94225	3.03151	56.0504	208.817	213.047	217.622	VWDE	1	NO
ENSG00000182118	-3.39048	0.0953597	6.78e-11	1.13e-09	6.79789	1.0105	19.402	81.8709	90.6585	109.369	FAM89A	1	NO
ENSG00000115648	-3.38984	0.095402	0.00670228	0.0223877	1.94225	1.0105	29.1031	114.987	106.977	112.717	MLPH	1	NO
ENSG00000025039	-3.3813	0.0959681	0.0121992	0.0373535	0.971127	0	12.9347	49.6745	51.6753	42.4084	RRAGD	1	NO
ENSG00000198865	-3.35884	0.0974736	0.0102466	0.0321671	0.971127	1.0105	24.7915	88.3101	106.977	78.1207	CCDC152	1	NO
ENSG00000160094	-3.33854	0.0988552	0.000213299	0.00111359	8.74014	4.04201	43.1157	180.3	171.345	212.042	ZNF362	1	NO
ENSG00000162407	-3.33426	0.0991487	1.11e-23	6.85e-22	12.6246	11.1155	34.4925	182.14	195.822	203.114	PLPP3	1	NO
ENSG00000137766	-3.32618	0.0997057	3.04e-13	6.88e-12	7.76901	3.03151	15.0905	112.227	75.2465	69.1926	UNC13C	1	NO
ENSG00000087510	-3.32509	0.0997808	4.35e-05	0.00026899	0.971127	0	5.38946	20.2377	22.6646	18.9722	TFAP2C	1	NO
ENSG00000101825	-3.30078	0.101477	0.00322466	0.0119603	0.971127	4.04201	28.0252	112.227	106.977	104.905	MXRA5	1	NO
ENSG00000162981	-3.27891	0.103027	0.00411673	0.0147574	0	0	6.46735	13.7985	41.7029	5.58005	FAM84A	1	NO
ENSG00000279406	-3.26807	0.103804	9.76e-08	1.02e-06	0.971127	3.03151	7.54524	38.6357	28.1041	42.4084	AL359183.1	1	NO
ENSG00000010810	-3.25962	0.104414	2.13e-26	1.62e-24	11.6535	17.1785	35.5704	193.178	203.982	213.158	FYN	1	NO
ENSG00000139973	-3.2495	0.105149	1.83e-06	1.53e-05	0.971127	1.0105	10.7789	34.0362	34.4502	50.2204	SYT16	1	NO
ENSG00000197172	-3.21172	0.107938	2.63e-08	3.03e-07	0.971127	5.05251	6.46735	33.1163	35.3568	45.7564	MAGEA6	1	NO
ENSG00000132688	-3.19666	0.109071	0.00150984	0.00620347	11.6535	1.0105	31.2589	133.385	133.268	135.037	NES	1	NO
ENSG00000182132	-3.1893	0.109629	3.33e-13	7.48e-12	4.85563	5.05251	11.8568	66.2326	72.5268	56.9165	KCNIP1	1	NO
ENSG00000196876	-3.15227	0.112479	0.000304199	0.00153434	3.88451	0	2.15578	16.5582	27.1975	10.0441	SCN8A	1	NO
ENSG00000163898	-3.13775	0.113617	1.33e-05	9.22e-05	1.94225	1.0105	6.46735	16.5582	38.0766	26.7842	LIPH	1	NO
ENSG00000003989	-3.1329	0.113999	0.00122628	0.00519332	13.5958	32.3361	159.528	582.295	687.191	531.22	SLC7A2	1	NO
ENSG00000141068	-3.12462	0.114655	2.34e-12	4.74e-11	6.79789	4.04201	17.2463	72.6719	99.7243	69.1926	KSR1	1	NO
ENSG00000138650	-3.12451	0.114664	7.97e-07	7.18e-06	1.94225	1.0105	14.0126	50.5944	50.7688	43.5244	PCDH10	1	NO
ENSG00000124212	-3.10027	0.116607	1.03e-10	1.67e-09	5.82676	5.05251	6.46735	43.2352	44.4227	61.3805	PTGIS	1	NO
ENSG00000104870	-3.09979	0.116646	1.74e-13	4.05e-12	3.88451	10.105	9.70102	58.8734	73.4334	69.1926	FCGRT	1	NO
ENSG00000065361	-3.07722	0.118485	0.00151211	0.00620633	0.971127	1.0105	7.54524	11.0388	58.928	8.92808	ERBB3	1	NO
ENSG00000162409	-3.07416	0.118737	4.98e-06	3.8e-05	28.1627	26.2731	113.179	480.186	485.023	444.172	PRKAA2	1	NO
ENSG00000149212	-3.06751	0.119285	1.36e-05	9.39e-05	0.971127	7.07352	3.23367	22.9974	50.7688	20.0882	SESN3	1	NO
ENSG00000205403	-3.05916	0.119978	4.03e-06	3.13e-05	86.4303	78.8192	328.757	1326.49	1314.55	1474.25	CFI	1	NO
ENSG00000127954	-3.04635	0.121048	0.00616735	0.0208857	0.971127	2.021	3.23367	3.67959	42.6095	4.46404	STEAP4	1	NO
ENSG00000050438	-3.04438	0.121214	1.77e-07	1.77e-06	1.94225	4.04201	22.6357	79.1112	79.7795	73.6566	SLC4A8	1	NO
ENSG00000183691	-3.04217	0.121399	1.38e-06	1.19e-05	1.94225	3.03151	24.7915	80.951	76.1531	84.8167	NOG	1	NO
ENSG00000106483	-3.04144	0.121461	1.77e-15	5.21e-14	8.74014	9.09452	25.8694	114.987	100.631	140.617	SFRP4	1	NO
ENSG00000176406	-3.02689	0.122692	1.12e-08	1.37e-07	5.82676	2.021	8.62313	48.7546	51.6753	32.3643	RIMS2	1	NO
ENSG00000104879	-3.01476	0.123728	0.00633453	0.0213705	2.91338	0	5.38946	5.51938	55.3017	5.58005	CKM	1	NO
ENSG00000265519	-3.01099	0.124052	2.81e-05	0.000181004	0.971127	1.0105	9.70102	28.5168	23.5712	40.1763	AC015922.3	1	NO
ENSG00000138472	-3.00611	0.124472	0.00154001	0.00630554	3.88451	3.03151	29.1031	98.429	77.9663	111.601	GUCA1C	1	NO
ENSG00000250799	-3.00099	0.124914	3.63e-05	0.000228939	0.971127	1.0105	7.54524	27.5969	19.0383	27.9002	PRODH2	1	NO
ENSG00000146411	-2.99353	0.125562	0.0062234	0.0210334	4.85563	4.04201	53.8946	160.062	161.372	177.445	SLC2A12	1	NO
ENSG00000134115	-2.98988	0.12588	3.72e-06	2.93e-05	0	4.04201	11.8568	48.7546	38.0766	36.8283	CNTN6	1	NO
ENSG00000151789	-2.97347	0.12732	1.36e-05	9.38e-05	1.94225	1.0105	18.3242	48.7546	54.3951	61.3805	ZNF385D	1	NO
ENSG00000134343	-2.96759	0.12784	7.67e-15	2.08e-13	18.4514	22.2311	68.985	255.731	270.162	326.991	ANO3	1	NO
ENSG00000071073	-2.95778	0.128712	5.11e-15	1.42e-13	21.3648	17.1785	64.6735	281.489	281.948	233.246	MGAT4A	1	NO
ENSG00000163623	-2.94692	0.129684	1.59e-06	1.35e-05	0.971127	4.04201	6.46735	27.5969	27.1975	32.3643	NKX6-1	1	NO
ENSG00000165548	-2.93439	0.130816	4.72e-09	6.08e-08	0.971127	11.1155	9.70102	60.7132	52.5819	51.3364	TMEM63C	1	NO
ENSG00000079112	-2.93234	0.131002	0.000477284	0.00228464	4.85563	5.05251	10.7789	23.9173	125.109	7.81207	CDH17	1	NO
ENSG00000198715	-2.92247	0.131901	1.33e-13	3.16e-12	11.6535	8.08402	26.9473	89.23	143.24	118.297	GLMP	1	NO
ENSG00000134531	-2.90743	0.133284	0.00508264	0.0177054	1.94225	4.04201	3.23367	6.43928	58.928	3.34803	EMP1	1	NO
ENSG00000006611	-2.90365	0.133633	0.000462835	0.0022224	5.82676	8.08402	42.0378	132.465	159.559	124.993	USH1C	1	NO
ENSG00000136378	-2.89217	0.1347	3.01e-08	3.42e-07	6.79789	3.03151	6.46735	41.3954	48.9556	30.1323	ADAMTS7	1	NO
ENSG00000165449	-2.88609	0.13527	2.54e-07	2.48e-06	0.971127	6.06301	17.2463	57.9535	61.6478	56.9165	SLC16A9	1	NO
ENSG00000108924	-2.87722	0.136104	6.26e-05	0.000373488	2.91338	4.04201	1.07789	14.7184	22.6646	22.3202	HLF	1	NO
ENSG00000115232	-2.87684	0.13614	8.69e-05	0.000499855	4.85563	2.021	2.15578	11.9587	32.6371	22.3202	ITGA4	1	NO
ENSG00000132437	-2.87579	0.136239	2.54e-06	2.06e-05	0.971127	7.07352	7.54524	41.3954	48.9556	22.3202	DDC	1	NO
ENSG00000118898	-2.86767	0.137007	9.47e-09	1.17e-07	7.76901	5.05251	6.46735	34.0362	64.3675	42.4084	PPL	1	NO
ENSG00000148702	-2.86732	0.137041	7.71e-29	7e-27	28.1627	31.3256	52.8167	273.21	225.74	316.947	HABP2	1	NO
ENSG00000132970	-2.85974	0.137763	2.78e-26	2.09e-24	25.2493	33.3466	63.5956	292.527	288.294	300.207	WASF3	1	NO
ENSG00000170293	-2.85725	0.138001	5.21e-10	7.76e-09	5.82676	4.04201	10.7789	45.075	50.7688	52.4524	CMTM8	1	NO
ENSG00000174740	-2.84688	0.138997	5.15e-06	3.92e-05	6.79789	1.0105	4.31157	22.0775	29.0107	36.8283	PABPC5	1	NO
ENSG00000109452	-2.84428	0.139247	1.52e-07	1.54e-06	1.94225	4.04201	14.0126	48.7546	45.3292	46.8724	INPP4B	1	NO
ENSG00000227145	-2.83246	0.140393	1.33e-05	9.22e-05	2.91338	2.021	5.38946	24.8372	18.1317	30.1323	IL21-AS1	1	NO
ENSG00000119514	-2.82609	0.141014	1.1e-22	6.37e-21	17.4803	15.1575	23.7136	117.747	132.361	148.429	GALNT12	1	NO
ENSG00000151117	-2.82251	0.141365	7.34e-06	5.4e-05	5.82676	1.0105	4.31157	25.7571	30.8239	22.3202	TMEM86A	1	NO
ENSG00000136848	-2.80074	0.143513	9.04e-08	9.5e-07	76.719	57.5986	195.098	776.393	728.894	787.903	DAB2IP	1	NO
ENSG00000123610	-2.79972	0.143615	5.53e-10	8.19e-09	77.6901	77.8087	199.41	803.07	844.031	821.383	TNFAIP6	1	NO
ENSG00000138646	-2.79846	0.143741	9.35e-07	8.29e-06	28.1627	30.3151	97.0102	333.003	352.662	393.951	HERC5	1	NO
ENSG00000111335	-2.78885	0.144701	2.07e-05	0.000137096	3.88451	3.03151	3.23367	17.478	20.8515	32.3643	OAS2	1	NO
ENSG00000164929	-2.78722	0.144865	8.36e-11	1.38e-09	5.82676	6.06301	14.0126	51.5142	60.7412	64.7285	BAALC	1	NO
ENSG00000136235	-2.78311	0.145278	0.00376212	0.0136562	0.971127	1.0105	8.62313	11.0388	51.6753	8.92808	GPNMB	1	NO
ENSG00000166415	-2.75336	0.148305	2.27e-21	1.18e-19	38.8451	40.4201	95.9323	383.597	371.7	420.736	WDR72	1	NO
ENSG00000137261	-2.75007	0.148644	1.66e-05	0.000112346	1.94225	3.03151	22.6357	57.9535	61.6478	63.6125	KIAA0319	1	NO
ENSG00000073737	-2.74534	0.149131	1.17e-17	4.37e-16	42.7296	27.2836	90.5429	347.721	346.315	378.327	DHRS9	1	NO
ENSG00000213424	-2.74431	0.149239	1.58e-05	0.000107439	1.94225	2.021	8.62313	28.5168	31.7305	22.3202	KRT222	1	NO
ENSG00000157214	-2.72073	0.151697	3.49e-26	2.61e-24	35.9317	25.2626	56.0504	277.809	223.926	267.842	STEAP2	1	NO
ENSG00000137198	-2.70459	0.153404	4.93e-09	6.34e-08	3.88451	6.06301	14.0126	53.354	47.1424	53.5685	GMPR	1	NO
ENSG00000179954	-2.69221	0.154726	5.44e-15	1.51e-13	20.3937	9.09452	24.7915	94.7494	116.043	139.501	SSC5D	1	NO
ENSG00000144648	-2.68194	0.155831	0.00153691	0.00629436	6.79789	1.0105	0	20.2377	15.4119	15.6241	ACKR2	1	NO
ENSG00000066468	-2.67959	0.156086	7.73e-08	8.23e-07	151.496	148.544	417.144	1505.87	1430.59	1656.16	FGFR2	1	NO
ENSG00000153253	-2.66744	0.157405	0.000650412	0.00299987	0	2.021	8.62313	18.3979	19.9449	27.9002	SCN3A	1	NO
ENSG00000181885	-2.66646	0.157513	0.00869455	0.028061	2.91338	2.021	3.23367	6.43928	41.7029	3.34803	CLDN7	1	NO
ENSG00000101955	-2.66603	0.15756	1.86e-24	1.2e-22	53.412	30.3151	78.6861	351.401	355.381	320.295	SRPX	1	NO
ENSG00000122862	-2.66576	0.15759	6.27e-14	1.55e-12	15.538	11.1155	9.70102	68.9923	75.2465	88.1647	SRGN	1	NO
ENSG00000135253	-2.65488	0.158783	1.67e-11	3.02e-10	11.6535	11.1155	31.2589	87.3902	108.79	141.733	KCP	1	NO
ENSG00000174292	-2.65341	0.158944	1.87e-17	6.81e-16	24.2782	20.21	54.9725	189.499	215.767	216.506	TNK1	1	NO
ENSG00000137642	-2.64782	0.159561	0.00533122	0.0184648	5.82676	2.021	2.15578	8.27908	48.9556	5.58005	SORL1	1	NO
ENSG00000159166	-2.62979	0.161567	0.00146862	0.00605431	3.88451	4.04201	1.07789	6.43928	30.8239	18.9722	LAD1	1	NO
ENSG00000148600	-2.61752	0.162948	0.00409502	0.014692	14.5669	6.06301	66.8293	160.062	175.877	199.766	CDHR1	1	NO
ENSG00000099139	-2.61149	0.16363	1.08e-10	1.76e-09	791.468	708.362	1622.23	6434.68	6171.12	6471.74	PCSK5	1	NO
ENSG00000165272	-2.60259	0.164642	0.000419503	0.00203866	0	6.06301	5.38946	20.2377	32.6371	15.6241	AQP3	1	NO
ENSG00000175414	-2.60167	0.164747	6.68e-05	0.000395998	3.88451	2.021	12.9347	21.1576	57.1148	34.5963	ARL10	1	NO
ENSG00000111186	-2.5755	0.167763	2.41e-06	1.96e-05	5.82676	3.03151	6.46735	24.8372	30.8239	35.7123	WNT5B	1	NO
ENSG00000124568	-2.56902	0.168518	8.16e-15	2.2e-13	14.5669	12.126	19.402	99.3489	75.2465	98.2088	SLC17A1	1	NO
ENSG00000168461	-2.56694	0.168761	2.34e-08	2.72e-07	8.74014	9.09452	36.6483	114.067	115.136	90.3968	RAB31	1	NO
ENSG00000108852	-2.56283	0.169243	3.45e-09	4.52e-08	11.6535	14.147	50.6609	141.664	160.466	146.197	MPP2	1	NO
ENSG00000124374	-2.54724	0.171082	3.15e-10	4.83e-09	6.79789	10.105	24.7915	78.1913	77.9663	84.8167	PAIP2B	1	NO
ENSG00000100151	-2.54556	0.171281	1.64e-12	3.38e-11	8.74014	23.2416	29.1031	141.664	111.51	100.441	PICK1	1	NO
ENSG00000136869	-2.54297	0.171589	0.00057172	0.00267309	0.971127	2.021	7.54524	22.9974	23.5712	13.3921	TLR4	1	NO
ENSG00000047648	-2.52437	0.173816	1.17e-20	5.85e-19	61.181	51.5356	122.88	448.91	407.963	494.392	ARHGAP6	1	NO
ENSG00000239697	-2.52103	0.174218	1.1e-16	3.73e-15	15.538	14.147	25.8694	100.269	105.164	111.601	TNFSF12	1	NO
ENSG00000167711	-2.52066	0.174263	3.78e-12	7.41e-11	30.1049	14.147	59.284	195.938	196.729	198.65	SERPINF2	1	NO
ENSG00000226791	-2.51824	0.174556	7.27e-05	0.000427231	0.971127	8.08402	4.31157	24.8372	29.9173	21.2042	AC109826.1	1	NO
ENSG00000107518	-2.51403	0.175065	1.41e-25	9.98e-24	72.8345	67.7037	140.126	554.698	497.715	545.729	ATRNL1	1	NO
ENSG00000135549	-2.51029	0.175521	6.36e-06	4.75e-05	4.85563	5.05251	4.31157	26.677	30.8239	23.4362	PKIB	1	NO
ENSG00000178947	-2.50885	0.175695	0.000313379	0.00157266	1.94225	6.06301	2.15578	13.7985	20.8515	23.4362	SMIM10L2A	1	NO
ENSG00000128833	-2.50737	0.175875	1.9e-11	3.4e-10	15.538	12.126	40.9599	132.465	119.669	135.037	MYO5C	1	NO
ENSG00000076555	-2.50471	0.1762	1.35e-11	2.48e-10	14.5669	21.2205	52.8167	166.501	153.213	179.678	ACACB	1	NO
ENSG00000251292	-2.50266	0.176451	1.79e-08	2.13e-07	9.71127	4.04201	10.7789	49.6745	45.3292	43.5244	ERVH-1	1	NO
ENSG00000215386	-2.49034	0.177965	2.1e-06	1.73e-05	2.91338	5.05251	11.8568	41.3954	32.6371	35.7123	MIR99AHG	1	NO
ENSG00000173227	-2.48265	0.178915	1.41e-12	2.93e-11	9.71127	13.1365	19.402	68.0724	80.6861	85.9327	SYT12	1	NO
ENSG00000175164	-2.46277	0.181399	1.82e-07	1.81e-06	10.6824	4.04201	8.62313	38.6357	37.17	53.5685	ABO	1	NO
ENSG00000231205	-2.46228	0.181459	0.00069929	0.00318926	2.91338	3.03151	3.23367	17.478	22.6646	10.0441	ZNF826P	1	NO
ENSG00000078725	-2.46018	0.181724	2.51e-51	9.88e-49	203.937	226.353	322.29	1415.72	1292.79	1426.26	BRINP1	1	NO
ENSG00000109255	-2.44586	0.183537	6.34e-07	5.81e-06	91.2859	74.7772	227.435	734.078	707.136	700.854	NMU	1	NO
ENSG00000235142	-2.44444	0.183717	2.59e-32	3.12e-30	88.3725	62.6511	111.023	442.471	433.348	549.077	LINC02532	1	NO
ENSG00000171227	-2.43196	0.185313	4.14e-10	6.26e-09	10.6824	19.1995	42.0378	119.587	115.136	150.661	TMEM37	1	NO
ENSG00000153246	-2.42096	0.186732	6.42e-31	6.83e-29	58.2676	55.5776	89.465	333.003	339.063	414.039	PLA2R1	1	NO
ENSG00000269416	-2.416	0.187374	0.000545679	0.00256695	4.85563	0	7.54524	21.1576	25.3844	18.9722	LINC01224	1	NO
ENSG00000139679	-2.41547	0.187444	1.61e-06	1.36e-05	6.79789	5.05251	6.46735	38.6357	29.9173	29.0162	LPAR6	1	NO
ENSG00000137673	-2.40075	0.189366	1.01e-29	9.66e-28	123.333	170.775	245.759	919.897	874.854	1051.28	MMP7	1	NO
ENSG00000244242	-2.39554	0.190052	7.9e-14	1.93e-12	33.0183	19.1995	57.1282	192.259	162.279	218.738	IFITM10	1	NO
ENSG00000086570	-2.39306	0.190378	2.63e-21	1.36e-19	29.1338	35.3676	54.9725	214.336	179.504	231.014	FAT2	1	NO
ENSG00000114279	-2.38012	0.192093	2.76e-05	0.000177972	4.85563	2.021	14.0126	38.6357	30.8239	37.9443	FGF12	1	NO
ENSG00000143341	-2.37971	0.192149	3.4e-08	3.83e-07	7.76901	7.07352	19.402	47.8347	66.1807	62.4965	HMCN1	1	NO
ENSG00000199568	-2.37949	0.192177	0.00284746	0.0107308	2.91338	0	8.62313	18.3979	27.1975	13.3921	RNU5A-1	1	NO
ENSG00000136881	-2.36786	0.193733	0.000940861	0.00412836	2.91338	1.0105	12.9347	26.677	39.8897	18.9722	BAAT	1	NO
ENSG00000141934	-2.36201	0.19452	1.5e-06	1.28e-05	5.82676	5.05251	8.62313	34.9561	34.4502	30.1323	PLPP2	1	NO
ENSG00000223865	-2.35297	0.195742	0.00155852	0.00637208	0	4.04201	8.62313	18.3979	27.1975	17.8562	HLA-DPB1	1	NO
ENSG00000271447	-2.33823	0.197753	0.00116564	0.0049714	1.94225	2.021	6.46735	20.2377	11.7856	20.0882	MMP28	1	NO
ENSG00000165795	-2.33674	0.197957	6.48e-11	1.09e-09	14.5669	15.1575	29.1031	80.0311	127.828	87.0487	NDRG2	1	NO
ENSG00000151623	-2.33053	0.19881	0.00492021	0.0171999	0	2.021	14.0126	21.1576	28.1041	30.1323	NR3C2	1	NO
ENSG00000124406	-2.31009	0.201648	5.12e-26	3.76e-24	59.2387	35.3676	58.2061	250.212	275.602	231.014	ATP8A1	1	NO
ENSG00000165949	-2.3054	0.202305	5.09e-14	1.27e-12	28.1627	38.3991	74.3745	194.098	254.75	244.406	IFI27	1	NO
ENSG00000250305	-2.28979	0.204506	2.65e-15	7.69e-14	18.4514	23.2416	23.7136	114.067	116.043	88.1647	TRMT9B	1	NO
ENSG00000276107	-2.28899	0.204619	0.000785154	0.00353226	3.88451	1.0105	6.46735	20.2377	19.0383	15.6241	AC037198.1	1	NO
ENSG00000235944	-2.28125	0.20572	6.69e-06	4.97e-05	7.76901	4.04201	8.62313	34.9561	25.3844	39.0603	ZNF815P	1	NO
ENSG00000257507	-2.28101	0.205754	0.00782148	0.0255506	1.94225	0	10.7789	23.9173	24.4778	12.2761	LINC02373	1	NO
ENSG00000135636	-2.27491	0.206625	7.58e-19	3.14e-17	79.6324	71.7457	159.528	519.742	489.556	491.044	DYSF	1	NO
ENSG00000112394	-2.27197	0.207047	1.06e-05	7.53e-05	4.85563	10.105	4.31157	27.5969	34.4502	31.2483	SLC16A10	1	NO
ENSG00000116990	-2.27188	0.20706	5.84e-21	2.94e-19	43.7007	46.4831	85.1534	288.848	262.91	291.278	MYCL	1	NO
ENSG00000140323	-2.26885	0.207495	8.67e-05	0.000499018	2.91338	9.09452	6.46735	37.7158	32.6371	17.8562	DISP2	1	NO
ENSG00000204936	-2.2673	0.207718	0.000172757	0.000921987	1.94225	4.04201	9.70102	23.9173	22.6646	27.9002	CD177	1	NO
ENSG00000067445	-2.26701	0.20776	1.31e-12	2.74e-11	33.0183	40.4201	93.7766	282.408	252.031	266.726	TRO	1	NO
ENSG00000151692	-2.26564	0.207957	3.11e-29	2.92e-27	66.0366	78.8192	114.256	434.192	436.067	370.515	RNF144A	1	NO
ENSG00000115221	-2.2649	0.208064	6.71e-25	4.5e-23	254.435	241.51	469.961	1581.3	1545.73	1509.96	ITGB6	1	NO
ENSG00000128606	-2.25326	0.20975	1.47e-07	1.49e-06	11.6535	10.105	8.62313	40.4755	40.7963	64.7285	LRRC17	1	NO
ENSG00000181045	-2.23083	0.213036	4.26e-06	3.29e-05	4.85563	6.06301	14.0126	33.1163	43.5161	39.0603	SLC26A11	1	NO
ENSG00000132470	-2.23007	0.213148	8.83e-09	1.09e-07	11.6535	25.2626	31.2589	77.2714	146.867	93.7448	ITGB4	1	NO
ENSG00000138378	-2.21393	0.215547	3.45e-08	3.88e-07	15.538	6.06301	22.6357	65.3127	76.1531	62.4965	STAT4	1	NO
ENSG00000154556	-2.21332	0.215638	9.42e-06	6.77e-05	5.82676	5.05251	9.70102	36.7959	29.9173	27.9002	SORBS2	1	NO
ENSG00000173698	-2.21168	0.215883	1.79e-11	3.23e-10	16.5092	14.147	16.1684	80.0311	64.3675	72.5406	ADGRG2	1	NO
ENSG00000106538	-2.20711	0.216568	8.08e-08	8.57e-07	2077.24	2225.13	4707.15	13537.2	13472.8	14589.6	RARRES2	1	NO
ENSG00000169851	-2.19612	0.218223	5.03e-08	5.5e-07	27.1915	6.06301	19.402	79.1112	83.4058	79.2367	PCDH7	1	NO
ENSG00000179546	-2.18594	0.21977	0.00146723	0.00605003	1.94225	3.03151	8.62313	23.9173	24.4778	12.2761	HTR1D	1	NO
ENSG00000099812	-2.18405	0.220057	1.67e-09	2.3e-08	13.5958	14.147	26.9473	63.4729	99.7243	83.7007	MISP	1	NO
ENSG00000187726	-2.18093	0.220534	2.39e-10	3.72e-09	18.4514	11.1155	22.6357	82.7908	64.3675	89.2808	DNAJB13	1	NO
ENSG00000147251	-2.17722	0.221101	1.09e-24	7.12e-23	59.2387	47.4936	86.2313	292.527	300.08	276.77	DOCK11	1	NO
ENSG00000134215	-2.17469	0.221489	3.26e-51	1.2e-48	169.947	198.058	248.993	926.337	901.145	953.072	VAV3	1	NO
ENSG00000111261	-2.17366	0.221647	5.06e-08	5.53e-07	10.6824	8.08402	23.7136	60.7132	63.4609	65.8446	MANSC1	1	NO
ENSG00000165617	-2.17287	0.221768	5.48e-13	1.19e-11	27.1915	27.2836	62.5177	176.62	175.877	171.865	DACT1	1	NO
ENSG00000069535	-2.17082	0.222085	0.000228058	0.00118313	5.82676	3.03151	19.402	33.1163	58.0214	34.5963	MAOB	1	NO
ENSG00000171951	-2.17014	0.22219	9.93e-06	7.1e-05	8.74014	3.03151	12.9347	37.7158	38.0766	34.5963	SCG2	1	NO
ENSG00000156966	-2.16366	0.22319	2.59e-12	5.2e-11	24.2782	36.3781	68.985	195.938	188.57	193.07	B3GNT7	1	NO
ENSG00000161267	-2.16357	0.223203	1.15e-06	1e-05	12.6246	12.126	46.3493	95.6693	102.444	118.297	BDH1	1	NO
ENSG00000185561	-2.15652	0.224296	1.67e-19	7.56e-18	27.1915	35.3676	34.4925	149.023	150.493	131.689	TLCD2	1	NO
ENSG00000140600	-2.14757	0.225692	2.22e-05	0.000146304	9.71127	7.07352	38.8041	79.1112	87.0322	78.1207	SH3GL3	1	NO
ENSG00000082482	-2.1446	0.226158	0.00570684	0.0195257	0	4.04201	12.9347	31.2765	18.1317	24.5522	KCNK2	1	NO
ENSG00000108813	-2.14161	0.226627	6.13e-07	5.64e-06	11.6535	6.06301	11.8568	49.6745	37.17	43.5244	DLX4	1	NO
ENSG00000164128	-2.13757	0.227262	4.04e-08	4.48e-07	10.6824	12.126	10.7789	44.1551	47.1424	56.9165	NPY1R	1	NO
ENSG00000146966	-2.1369	0.227368	1.81e-07	1.8e-06	13.5958	8.08402	21.5578	64.3928	47.1424	78.1207	DENND2A	1	NO
ENSG00000105929	-2.13677	0.227388	0.00163019	0.00662024	1.94225	4.04201	8.62313	11.9587	28.1041	23.4362	ATP6V0A4	1	NO
ENSG00000061337	-2.13572	0.227554	4.53e-10	6.81e-09	15.538	33.3466	49.583	137.985	124.202	168.517	LZTS1	1	NO
ENSG00000277494	-2.13359	0.22789	0.00115063	0.00492354	2.91338	5.05251	4.31157	11.9587	21.758	20.0882	GPIHBP1	1	NO
ENSG00000225792	-2.12099	0.22989	0.00122932	0.00519838	2.91338	4.04201	4.31157	15.6383	15.4119	17.8562	AC004540.2	1	NO
ENSG00000137868	-2.12012	0.230028	3.96e-15	1.12e-13	33.9894	28.2941	56.0504	145.344	184.037	183.026	STRA6	1	NO
ENSG00000185275	-2.11598	0.230689	8.29e-14	2.02e-12	18.4514	25.2626	32.3367	100.269	121.482	106.021	CD24P4	1	NO
ENSG00000177614	-2.11421	0.230972	9.1e-17	3.13e-15	154.409	196.037	364.327	1080.88	963.7	1045.7	PGBD5	1	NO
ENSG00000166689	-2.11254	0.23124	2.9e-59	1.96e-56	145.669	177.848	189.709	734.998	729.801	751.074	PLEKHA7	1	NO
ENSG00000135744	-2.10735	0.232073	1.22e-15	3.67e-14	22.3359	29.3046	25.8694	109.468	105.164	119.413	AGT	1	NO
ENSG00000198624	-2.10703	0.232124	0.000948863	0.00415807	1.94225	7.07352	6.46735	13.7985	29.0107	23.4362	CCDC69	1	NO
ENSG00000185442	-2.09873	0.233464	5.65e-05	0.000341334	5.82676	5.05251	7.54524	23.9173	29.0107	25.6682	FAM174B	1	NO
ENSG00000154040	-2.09827	0.233539	0.000237331	0.00122672	8.74014	7.07352	10.7789	25.7571	66.1807	21.2042	CABYR	1	NO
ENSG00000198774	-2.09809	0.233567	2.51e-15	7.3e-14	23.307	31.3256	42.0378	154.543	129.642	127.225	RASSF9	1	NO
ENSG00000101265	-2.08777	0.235244	1.14e-24	7.46e-23	164.12	175.827	296.42	871.143	882.107	947.492	RASSF2	1	NO
ENSG00000109743	-2.08526	0.235654	5.37e-09	6.85e-08	14.5669	11.1155	24.7915	80.951	67.9939	63.6125	BST1	1	NO
ENSG00000136425	-2.08275	0.236065	2.85e-08	3.26e-07	10.6824	16.168	31.2589	80.0311	70.7136	93.7448	CIB2	1	NO
ENSG00000180044	-2.08246	0.236112	4.63e-08	5.09e-07	14.5669	11.1155	34.4925	85.5505	82.4992	84.8167	C3orf80	1	NO
ENSG00000196782	-2.07718	0.236976	7.39e-06	5.43e-05	8.74014	7.07352	7.54524	32.1964	29.9173	36.8283	MAML3	1	NO
ENSG00000004139	-2.06739	0.23859	3.25e-11	5.66e-10	21.3648	17.1785	31.2589	79.1112	109.697	102.673	SARM1	1	NO
ENSG00000135298	-2.06139	0.239586	0.00233532	0.00904067	5.82676	1.0105	9.70102	14.7184	21.758	32.3643	ADGRB3	1	NO
ENSG00000135100	-2.06046	0.239739	0.00105574	0.00456838	3.88451	3.03151	6.46735	14.7184	21.758	18.9722	HNF1A	1	NO
ENSG00000250510	-2.05706	0.240306	4.48e-06	3.45e-05	7.76901	6.06301	17.2463	42.3153	44.4227	41.2923	GPR162	1	NO
ENSG00000102575	-2.05608	0.240469	5.42e-05	0.000328574	6.79789	7.07352	7.54524	24.8372	24.4778	40.1763	ACP5	1	NO
ENSG00000267056	-2.04793	0.241831	1.98e-05	0.000131484	5.82676	7.07352	9.70102	34.0362	30.8239	27.9002	AC005336.1	1	NO
ENSG00000169067	-2.04202	0.242824	2.26e-06	1.85e-05	10.6824	7.07352	17.2463	45.9949	58.928	37.9443	ACTBL2	1	NO
ENSG00000124564	-2.03838	0.243437	3e-19	1.31e-17	49.5275	32.3361	56.0504	180.3	185.85	199.766	SLC17A3	1	NO
ENSG00000278621	-2.03634	0.243781	0.00030576	0.00153854	4.85563	7.07352	5.38946	17.478	22.6646	31.2483	AC037198.2	1	NO
ENSG00000237840	-2.03617	0.24381	0.00191702	0.00762388	6.79789	3.03151	5.38946	33.1163	13.5988	15.6241	FAM21FP	1	NO
ENSG00000241119	-2.03361	0.244243	0.000200025	0.00105027	11.6535	3.03151	5.38946	26.677	27.1975	29.0162	UGT1A9	1	NO
ENSG00000122592	-2.0239	0.245893	1.31e-05	9.07e-05	7.76901	8.08402	10.7789	26.677	44.4227	36.8283	HOXA7	1	NO
ENSG00000182389	-2.02256	0.246122	0.000773924	0.00348682	2.91338	8.08402	5.38946	29.4367	19.9449	16.7401	CACNB4	1	NO
ENSG00000196611	-2.02172	0.246264	2.83e-15	8.17e-14	122.362	115.197	251.149	671.525	681.752	627.197	MMP1	1	NO
ENSG00000105419	-2.01029	0.248223	0.000421973	0.00204902	5.82676	3.03151	11.8568	35.876	25.3844	21.2042	MEIS3	1	NO
ENSG00000170482	-2.0021	0.249636	1.21e-15	3.66e-14	25.2493	32.3361	38.8041	121.426	136.894	126.109	SLC23A1	1	NO
ENSG00000143375	-2.00042	0.249927	1.8e-06	1.51e-05	8.74014	18.189	25.8694	55.1938	95.1914	59.1485	CGN	1	NO
ENSG00000143515	-1.99969	0.250053	2.83e-21	1.45e-19	82.5458	79.8297	140.126	407.515	414.309	383.907	ATP8B2	1	NO
ENSG00000178695	-1.97585	0.254221	1.86e-19	8.39e-18	120.42	111.155	211.267	564.817	587.467	585.905	KCTD12	1	NO
ENSG00000140022	-1.97136	0.255012	2.06e-05	0.000136366	5.82676	9.09452	19.402	52.4341	42.6095	37.9443	STON2	1	NO
ENSG00000078018	-1.97111	0.255057	2.48e-15	7.24e-14	44.6718	30.3151	51.7388	153.623	192.196	149.545	MAP2	1	NO
ENSG00000000003	-1.965	0.256139	8.11e-27	6.44e-25	127.218	106.103	177.852	544.579	555.737	501.088	TSPAN6	1	NO
ENSG00000104381	-1.9646	0.256209	4.02e-16	1.29e-14	33.9894	39.4096	60.3619	185.819	170.438	162.937	GDAP1	1	NO
ENSG00000167680	-1.9622	0.256637	2.2e-27	1.83e-25	211.706	233.426	354.626	1089.16	994.524	1027.84	SEMA6B	1	NO
ENSG00000260328	-1.95659	0.257637	0.00196546	0.00778904	3.88451	3.03151	7.54524	20.2377	21.758	13.3921	AC104024.2	1	NO
ENSG00000198729	-1.9312	0.262211	6.04e-16	1.9e-14	32.0472	42.4411	58.2061	170.181	159.559	174.097	PPP1R14C	1	NO
ENSG00000241388	-1.92707	0.262963	0.000225507	0.00117097	4.85563	9.09452	6.46735	22.0775	24.4778	31.2483	HNF1A-AS1	1	NO
ENSG00000113361	-1.91919	0.264403	3.63e-61	2.79e-58	6430.8	6513.7	8359.05	26776.4	25952.8	27837.7	CDH6	1	NO
ENSG00000282840	-1.91225	0.265677	0.00179686	0.0072002	5.82676	8.08402	2.15578	25.7571	17.2251	17.8562	AC004554.2	1	NO
ENSG00000135114	-1.90763	0.26653	3.36e-14	8.65e-13	31.0761	27.2836	43.1157	133.385	118.763	127.225	OASL	1	NO
ENSG00000154479	-1.90461	0.267088	0.000109964	0.000613807	7.76901	7.07352	7.54524	32.1964	29.0107	22.3202	CCDC173	1	NO
ENSG00000198416	-1.90459	0.267091	3.09e-05	0.000197873	9.71127	8.08402	9.70102	33.1163	42.6095	26.7842	ZNF658B	1	NO
ENSG00000166963	-1.90173	0.267622	1.17e-06	1.02e-05	16.5092	32.3361	67.9072	146.264	130.548	157.357	MAP1A	1	NO
ENSG00000269706	-1.90153	0.267659	6.83e-05	0.000403419	18.4514	10.105	57.1282	112.227	107.884	98.2088	AC008687.6	1	NO
ENSG00000166387	-1.89464	0.268941	1.69e-05	0.000114031	7.76901	8.08402	16.1684	42.3153	33.5436	42.4084	PPFIBP2	1	NO
ENSG00000272398	-1.89034	0.269744	2.71e-50	9.76e-48	15193.3	15306.1	20573.7	62634.9	61990.5	64708.5	CD24	1	NO
ENSG00000132563	-1.88898	0.269997	1.37e-08	1.66e-07	17.4803	16.168	32.3367	78.1913	72.5268	92.6288	REEP2	1	NO
ENSG00000266976	-1.88639	0.270484	0.00953836	0.0303268	1.94225	7.07352	5.38946	14.7184	29.0107	8.92808	AC079466.1	1	NO
ENSG00000161040	-1.88177	0.271351	6.52e-18	2.48e-16	58.2676	58.6091	89.465	263.091	216.674	279.002	FBXL13	1	NO
ENSG00000170579	-1.87876	0.271918	0.0083259	0.0270001	4.85563	3.03151	5.38946	7.35918	23.5712	17.8562	DLGAP1	1	NO
ENSG00000174827	-1.87138	0.273312	8.13e-26	5.85e-24	743.883	710.383	1167.36	3200.32	2996.26	3391.55	PDZK1	1	NO
ENSG00000165092	-1.86262	0.274976	5.93e-34	7.89e-32	4958.57	4965.61	7368.47	20344.4	20711.8	21826.9	ALDH1A1	1	NO
ENSG00000170959	-1.84272	0.278795	0.00398624	0.0143658	2.91338	4.04201	6.46735	14.7184	16.3185	16.7401	DCDC1	1	NO
ENSG00000203721	-1.84036	0.279253	1.47e-09	2.04e-08	30.1049	17.1785	42.0378	107.628	106.07	104.905	LINC00862	1	NO
ENSG00000165215	-1.83885	0.279545	0.00199177	0.00787115	10.6824	12.126	20.4799	26.677	101.538	25.6682	CLDN3	1	NO
ENSG00000198074	-1.8386	0.279592	0.0114641	0.0354126	142.756	136.418	199.41	303.566	1167.68	239.942	AKR1B10	1	NO
ENSG00000120820	-1.83404	0.280478	5.68e-05	0.000342656	13.5958	7.07352	16.1684	34.0362	36.2634	61.3805	GLT8D2	1	NO
ENSG00000072134	-1.83063	0.281141	7.56e-17	2.65e-15	39.8162	38.3991	50.6609	145.344	156.839	155.125	EPN2	1	NO
ENSG00000138336	-1.82338	0.282558	1.95e-06	1.62e-05	11.6535	16.168	31.2589	81.8709	66.1807	59.1485	TET1	1	NO
ENSG00000169026	-1.81536	0.284133	7.66e-05	0.000447208	8.74014	9.09452	8.62313	30.3566	26.291	36.8283	SLC49A3	1	NO
ENSG00000143502	-1.81395	0.28441	9.94e-18	3.73e-16	127.218	136.418	230.669	590.574	540.325	603.761	SUSD4	1	NO
ENSG00000189060	-1.81361	0.284478	8.64e-07	7.72e-06	26.2204	40.4201	40.9599	82.7908	194.916	99.3248	H1F0	1	NO
ENSG00000164220	-1.80775	0.285635	1.46e-07	1.48e-06	15.538	21.2205	14.0126	58.8734	52.5819	66.9606	F2RL2	1	NO
ENSG00000163590	-1.80586	0.286011	6.38e-14	1.58e-12	52.4408	35.3676	64.6735	160.982	174.064	197.534	PPM1L	1	NO
ENSG00000057657	-1.79357	0.288458	7.48e-09	9.37e-08	19.4225	22.2311	30.181	70.8321	98.8178	78.1207	PRDM1	1	NO
ENSG00000048342	-1.79177	0.288818	4.66e-07	4.36e-06	17.4803	21.2205	48.5051	103.028	99.7243	97.0928	CC2D2A	1	NO
ENSG00000010379	-1.78553	0.290069	0.00345495	0.0126892	9.71127	3.03151	5.38946	13.7985	23.5712	25.6682	SLC6A13	1	NO
ENSG00000159556	-1.7839	0.290397	0.000216899	0.00113079	13.5958	4.04201	15.0905	41.3954	29.9173	41.2923	ISL2	1	NO
ENSG00000152377	-1.77625	0.291941	7.91e-70	1.22e-66	1932.54	2095.78	2408.01	7441.05	7057.76	7543.11	SPOCK1	1	NO
ENSG00000148082	-1.77026	0.293155	3.71e-11	6.4e-10	25.2493	27.2836	31.2589	91.9897	88.8453	104.905	SHC3	1	NO
ENSG00000226887	-1.7701	0.293189	0.00131829	0.00552485	5.82676	5.05251	9.70102	30.3566	18.1317	21.2042	ERVMER34-1	1	NO
ENSG00000204262	-1.76998	0.293212	1.39e-21	7.38e-20	101.968	78.8192	128.269	359.68	329.997	362.703	COL5A2	1	NO
ENSG00000116106	-1.76856	0.293502	3.34e-32	3.95e-30	233.07	222.311	313.666	864.703	817.74	935.216	EPHA4	1	NO
ENSG00000205744	-1.7672	0.293779	6.27e-27	5.05e-25	103.911	107.113	143.36	403.835	376.233	424.084	DENND1C	1	NO
ENSG00000084444	-1.76166	0.294909	5.07e-14	1.27e-12	39.8162	37.3886	56.0504	158.222	135.081	157.357	FAM234B	1	NO
ENSG00000100644	-1.76038	0.295171	5.21e-28	4.54e-26	290.367	245.552	383.729	970.492	1069.77	1072.49	HIF1A	1	NO
ENSG00000135220	-1.74743	0.297832	3.67e-19	1.59e-17	49.5275	63.6616	67.9072	200.538	210.328	195.302	UGT2A3	1	NO
ENSG00000253671	-1.74631	0.298064	8.29e-05	0.000480119	8.74014	11.1155	8.62313	28.5168	32.6371	34.5963	AC027117.1	1	NO
ENSG00000243244	-1.74084	0.299196	9.89e-07	8.73e-06	25.2493	13.1365	17.2463	54.2739	58.0214	74.7726	STON1	1	NO
ENSG00000225329	-1.73774	0.29984	0.00432875	0.0154095	1.94225	8.08402	7.54524	22.0775	18.1317	17.8562	LHFPL3-AS2	1	NO
ENSG00000153822	-1.73447	0.300519	4.57e-44	1.03e-41	351.548	369.844	461.338	1317.29	1251.09	1363.76	KCNJ16	1	NO
ENSG00000168243	-1.73244	0.300943	1.92e-09	2.61e-08	63.1232	76.7982	157.372	306.326	341.783	337.035	GNG4	1	NO
ENSG00000272899	-1.72951	0.301555	3.31e-05	0.000211263	7.76901	20.21	26.9473	60.7132	70.7136	49.1044	AC025594.2	1	NO
ENSG00000253873	-1.72386	0.302739	0.0038804	0.0140202	2.91338	8.08402	8.62313	29.4367	19.0383	15.6241	PCDHGA11	1	NO
ENSG00000154930	-1.7169	0.304202	1.1e-05	7.81e-05	19.4225	17.1785	26.9473	57.0336	101.538	49.1044	ACSS1	1	NO
ENSG00000231638	-1.71527	0.304546	5.84e-27	4.72e-25	216.561	223.321	322.29	840.786	807.767	850.399	LUARIS	1	NO
ENSG00000267480	-1.71445	0.304719	6.9e-05	0.000407091	13.5958	7.07352	23.7136	52.4341	50.7688	41.2923	AP001542.3	1	NO
ENSG00000272841	-1.71256	0.305119	5.46e-22	2.98e-20	258.32	296.077	434.39	1056.04	1112.38	1068.02	AL139393.2	1	NO
ENSG00000143554	-1.71206	0.305224	2.17e-08	2.53e-07	20.3937	32.3361	47.4272	95.6693	116.949	113.833	SLC27A3	1	NO
ENSG00000183044	-1.71195	0.305248	7.73e-09	9.67e-08	22.3359	23.2416	23.7136	66.2326	75.2465	85.9327	ABAT	1	NO
ENSG00000214510	-1.70853	0.305973	0.00656588	0.022006	3.88451	9.09452	3.23367	14.7184	16.3185	22.3202	SPINK13	1	NO
ENSG00000113721	-1.70143	0.307482	1.04e-07	1.08e-06	21.3648	17.1785	33.4146	72.6719	72.5268	88.1647	PDGFRB	1	NO
ENSG00000146049	-1.69523	0.308806	2.4e-06	1.96e-05	13.5958	15.1575	21.5578	45.9949	62.5544	53.5685	KAAG1	1	NO
ENSG00000002746	-1.69446	0.30897	1.16e-33	1.51e-31	278.713	329.424	382.651	1019.25	1008.12	1177.39	HECW1	1	NO
ENSG00000244468	-1.69105	0.309701	0.000403244	0.00196813	10.6824	5.05251	11.8568	32.1964	30.8239	25.6682	AC093001.1	1	NO
ENSG00000104848	-1.68943	0.31005	0.000136133	0.000744392	18.4514	5.05251	19.402	45.075	46.2358	46.8724	KCNA7	1	NO
ENSG00000165181	-1.67779	0.312561	0.00160207	0.00652634	5.82676	9.09452	5.38946	22.9974	20.8515	21.2042	C9orf84	1	NO
ENSG00000244694	-1.67667	0.312804	1.58e-21	8.35e-20	91.2859	67.7037	84.0755	270.45	256.564	249.986	PTCHD4	1	NO
ENSG00000178662	-1.67521	0.31312	4.34e-07	4.07e-06	23.307	29.3046	15.0905	59.7933	82.4992	74.7726	CSRNP3	1	NO
ENSG00000108984	-1.67206	0.313805	8.59e-15	2.31e-13	57.2965	53.5566	86.2313	219.855	210.328	195.302	MAP2K6	1	NO
ENSG00000188859	-1.6625	0.315892	0.00184611	0.0073731	3.88451	12.126	9.70102	23.9173	21.758	35.7123	FAM78B	1	NO
ENSG00000065320	-1.6604	0.316352	1.93e-17	7.05e-16	53.412	65.6826	72.2187	207.897	209.421	185.258	NTN1	1	NO
ENSG00000185345	-1.65912	0.316633	0.0015218	0.00624003	5.82676	11.1155	5.38946	24.8372	24.4778	21.2042	PRKN	1	NO
ENSG00000166147	-1.65583	0.317356	4.78e-43	1.04e-40	348.634	347.613	397.742	1251.06	1032.6	1161.77	FBN1	1	NO
ENSG00000021300	-1.65441	0.317668	0.0107066	0.0333756	6.79789	6.06301	2.15578	11.9587	19.0383	16.7401	PLEKHB1	1	NO
ENSG00000124496	-1.65199	0.3182	6.64e-06	4.94e-05	15.538	12.126	16.1684	44.1551	43.5161	50.2204	TRERF1	1	NO
ENSG00000205835	-1.63928	0.321017	3.75e-09	4.88e-08	28.1627	44.4621	49.583	153.623	116.949	108.253	GMNC	1	NO
ENSG00000213030	-1.63902	0.321075	2.76e-06	2.23e-05	52.4408	43.4516	131.503	257.571	207.608	241.058	CGB8	1	NO
ENSG00000164251	-1.63484	0.322005	7.56e-09	9.47e-08	99.0549	110.145	238.214	468.228	484.116	434.128	F2RL1	1	NO
ENSG00000171903	-1.62327	0.3246	3.95e-21	2e-19	83.5169	80.8402	103.478	271.37	258.377	294.626	CYP4F11	1	NO
ENSG00000130545	-1.62217	0.324846	3.43e-18	1.33e-16	133.044	120.25	190.787	409.354	466.891	488.812	CRB3	1	NO
ENSG00000065325	-1.6194	0.32547	1.9e-08	2.24e-07	25.2493	27.2836	46.3493	104.868	91.5651	106.021	GLP2R	1	NO
ENSG00000169129	-1.61691	0.326034	1.86e-10	2.92e-09	56.3253	34.3571	68.985	148.103	172.251	168.517	AFAP1L2	1	NO
ENSG00000196482	-1.61178	0.327194	0.00462529	0.0163106	5.82676	9.09452	5.38946	22.9974	25.3844	13.3921	ESRRG	1	NO
ENSG00000169184	-1.60607	0.328493	1.55e-20	7.61e-19	260.262	308.203	431.157	1033.96	970.952	1034.54	MN1	1	NO
ENSG00000166165	-1.60507	0.328719	0.00666351	0.0222714	37.8739	25.2626	30.181	43.2352	206.701	33.4803	CKB	1	NO
ENSG00000153982	-1.6043	0.328895	3.58e-05	0.000225884	24.2782	12.126	24.7915	49.6745	83.4058	52.4524	GDPD1	1	NO
ENSG00000159403	-1.59977	0.32993	0.00123309	0.00520849	31.0761	27.2836	26.9473	50.5944	164.998	42.4084	C1R	1	NO
ENSG00000177839	-1.59279	0.33153	1.97e-05	0.000131144	12.6246	22.2311	17.2463	43.2352	64.3675	49.1044	PCDHB9	1	NO
ENSG00000006788	-1.59275	0.331539	2.34e-06	1.91e-05	28.1627	22.2311	34.4925	57.9535	87.9387	110.485	MYH13	1	NO
ENSG00000153898	-1.59135	0.331861	2.01e-07	1.98e-06	32.0472	39.4096	76.5303	156.383	131.455	156.241	MCOLN2	1	NO
ENSG00000165633	-1.59122	0.331891	3.61e-41	7.01e-39	558.398	592.154	735.122	1915.23	1870.28	1891.64	VSTM4	1	NO
ENSG00000129295	-1.58714	0.332831	1.27e-10	2.05e-09	36.9028	40.4201	54.9725	119.587	152.306	123.877	LRRC6	1	NO
ENSG00000178184	-1.57866	0.334792	1.9e-09	2.59e-08	43.7007	31.3256	61.4398	149.023	128.735	128.341	PARD6G	1	NO
ENSG00000171234	-1.57322	0.336057	0.000126224	0.000695835	10.6824	11.1155	23.7136	44.1551	49.8622	40.1763	UGT2B7	1	NO
ENSG00000144730	-1.56781	0.337319	1.04e-15	3.21e-14	69.9211	58.6091	78.6861	204.217	185.85	224.318	IL17RD	1	NO
ENSG00000189052	-1.5671	0.337485	0.00553719	0.0190727	7.76901	5.05251	6.46735	23.9173	15.4119	17.8562	CGB5	1	NO
ENSG00000133321	-1.56417	0.338171	4.83e-08	5.29e-07	49.5275	43.4516	78.6861	130.625	215.767	159.589	RARRES3	1	NO
ENSG00000198246	-1.55788	0.339651	6.35e-12	1.22e-10	86.4303	99.0292	165.995	343.122	341.783	347.079	SLC29A3	1	NO
ENSG00000272482	-1.55727	0.339794	9.2e-07	8.17e-06	17.4803	27.2836	22.6357	58.8734	74.34	64.7285	AC254633.1	1	NO
ENSG00000254726	-1.55694	0.339871	2.3e-12	4.68e-11	62.1521	54.5671	94.8544	203.297	213.954	203.114	MEX3A	1	NO
ENSG00000186952	-1.55541	0.340231	0.000780667	0.00351394	10.6824	11.1155	6.46735	29.4367	27.1975	26.7842	TMEM232	1	NO
ENSG00000196411	-1.55485	0.340364	5.99e-11	1.01e-09	38.8451	40.4201	33.4146	104.868	115.136	111.601	EPHB4	1	NO
ENSG00000138400	-1.55116	0.341237	0.000424946	0.00206096	6.79789	15.1575	24.7915	49.6745	42.6095	43.5244	MDH1B	1	NO
ENSG00000185100	-1.55052	0.341387	2.08e-06	1.71e-05	21.3648	16.168	29.1031	57.9535	64.3675	72.5406	ADSSL1	1	NO
ENSG00000110693	-1.53908	0.344105	0.00405147	0.0145605	14.5669	8.08402	14.0126	23.9173	59.8346	22.3202	SOX6	1	NO
ENSG00000273295	-1.53175	0.345858	3.06e-06	2.46e-05	22.3359	22.2311	18.3242	70.8321	61.6478	49.1044	AP000350.6	1	NO
ENSG00000261069	-1.52307	0.347945	0.00611238	0.0207203	16.5092	14.147	2.15578	31.2765	27.1975	36.8283	AC124312.3	1	NO
ENSG00000225111	-1.52087	0.348475	0.000589899	0.00275123	9.71127	10.105	15.0905	24.8372	37.17	37.9443	AC083900.1	1	NO
ENSG00000126217	-1.51579	0.349705	0.000142863	0.00077667	9.71127	18.189	21.5578	42.3153	40.7963	58.0325	MCF2L	1	NO
ENSG00000125730	-1.51052	0.350984	4.38e-14	1.11e-12	359.317	357.718	465.649	873.902	1472.29	1021.15	C3	1	NO
ENSG00000186567	-1.51027	0.351046	1.79e-09	2.45e-08	43.7007	45.4726	35.5704	134.305	97.0046	124.993	CEACAM19	1	NO
ENSG00000105699	-1.50733	0.351762	1.6e-15	4.75e-14	599.185	579.018	985.193	2046.77	1950.97	2149.43	LSR	1	NO
ENSG00000214049	-1.50728	0.351775	7.72e-10	1.11e-08	191.312	162.691	352.47	648.528	655.461	701.97	UCA1	1	NO
ENSG00000236039	-1.50478	0.352384	0.0127436	0.0386215	10.6824	3.03151	7.54524	27.5969	18.1317	14.5081	AC019117.1	1	NO
ENSG00000095587	-1.50043	0.353447	1.1e-13	2.63e-12	84.488	83.8717	132.581	268.61	282.854	297.975	TLL2	1	NO
ENSG00000142765	-1.49175	0.355582	2.63e-05	0.000170749	17.4803	14.147	23.7136	45.9949	59.8346	49.1044	SYTL1	1	NO
ENSG00000185112	-1.49121	0.355714	0.00644862	0.0216904	7.76901	7.07352	5.38946	22.0775	18.1317	16.7401	FAM43A	1	NO
ENSG00000183023	-1.48787	0.356539	1.07e-25	7.65e-24	145.669	134.397	169.229	436.031	417.936	403.995	SLC8A1	1	NO
ENSG00000122547	-1.48228	0.357922	1.27e-17	4.67e-16	96.1415	93.9767	129.347	300.806	310.052	279.002	EEPD1	1	NO
ENSG00000138642	-1.4673	0.361659	1.14e-08	1.39e-07	82.5458	124.292	192.943	394.636	349.942	358.239	HERC6	1	NO
ENSG00000267327	-1.46299	0.36274	0.0108094	0.0336465	3.88451	9.09452	6.46735	16.5582	19.0383	17.8562	AC009271.1	1	NO
ENSG00000259343	-1.46122	0.363185	0.00354381	0.0129691	15.538	7.07352	7.54524	34.9561	21.758	26.7842	TMC3-AS1	1	NO
ENSG00000090971	-1.46088	0.363271	1.26e-17	4.67e-16	125.275	105.092	151.983	345.881	325.464	380.559	NAT14	1	NO
ENSG00000155016	-1.45552	0.364625	1.41e-25	9.98e-24	136.929	146.523	150.905	390.036	375.326	426.316	CYP2U1	1	NO
ENSG00000112294	-1.45443	0.364899	3.4e-11	5.91e-10	48.5563	64.6721	79.764	187.659	163.185	176.329	ALDH5A1	1	NO
ENSG00000136206	-1.45295	0.365273	0.00254441	0.00973858	17.4803	10.105	7.54524	23.9173	42.6095	30.1323	SPDYE1	1	NO
ENSG00000106714	-1.4523	0.365439	1.8e-06	1.51e-05	20.3937	29.3046	28.0252	73.5918	59.8346	79.2367	CNTNAP3	1	NO
ENSG00000277011	-1.45051	0.365892	0.000167551	0.000898175	12.6246	29.3046	19.402	54.2739	44.4227	69.1926	AC148477.4	1	NO
ENSG00000144749	-1.44496	0.367302	3.07e-11	5.38e-10	59.2387	50.5251	81.9197	169.261	169.531	181.91	LRIG1	1	NO
ENSG00000076351	-1.44342	0.367695	2.05e-12	4.19e-11	71.8634	75.7877	105.633	257.571	203.982	225.434	SLC46A1	1	NO
ENSG00000261335	-1.43962	0.368664	0.00777478	0.0254128	4.85563	9.09452	7.54524	20.2377	19.9449	17.8562	AC005837.1	1	NO
ENSG00000242110	-1.4368	0.369386	1.24e-37	2.02e-35	309.789	333.466	336.302	838.026	854.003	960.884	AMACR	1	NO
ENSG00000079263	-1.43342	0.370252	0.00817771	0.0265756	6.79789	5.05251	10.7789	22.0775	21.758	16.7401	SP140	1	NO
ENSG00000134326	-1.43213	0.370583	0.000499141	0.00237328	11.6535	13.1365	20.4799	34.9561	51.6753	34.5963	CMPK2	1	NO
ENSG00000189120	-1.42945	0.371272	1.17e-07	1.21e-06	27.1915	39.4096	34.4925	81.8709	87.9387	102.673	SP6	1	NO
ENSG00000180626	-1.42546	0.372301	7.41e-17	2.61e-15	92.257	84.8822	102.4	234.574	242.058	274.538	ZNF594	1	NO
ENSG00000225511	-1.42209	0.373172	2.94e-23	1.79e-21	132.073	122.271	120.724	329.323	349.035	326.991	LINC00475	1	NO
ENSG00000171219	-1.42058	0.373563	1.5e-05	0.000102527	16.5092	22.2311	22.6357	49.6745	55.3017	59.1485	CDC42BPG	1	NO
ENSG00000088280	-1.41668	0.374573	5.93e-33	7.43e-31	295.222	305.172	334.146	791.112	791.449	912.896	ASAP3	1	NO
ENSG00000186469	-1.4159	0.374775	3.92e-10	5.97e-09	51.4697	45.4726	70.0629	135.225	153.213	156.241	GNG2	1	NO
ENSG00000259207	-1.41208	0.37577	1.2e-64	1.07e-61	953.646	879.137	971.18	2430.37	2464.1	2567.94	ITGB3	1	NO
ENSG00000184925	-1.41175	0.375855	0.00815028	0.0265119	6.79789	10.105	5.38946	18.3979	19.9449	21.2042	LCN12	1	NO
ENSG00000133640	-1.40787	0.376868	1.78e-05	0.00011916	27.1915	21.2205	50.6609	82.7908	90.6585	88.1647	LRRIQ1	1	NO
ENSG00000174672	-1.40608	0.377335	2.11e-05	0.00013969	22.3359	18.189	35.5704	62.553	61.6478	77.0046	BRSK2	1	NO
ENSG00000147799	-1.4052	0.377567	1e-18	4.11e-17	133.044	118.229	150.905	365.199	318.211	381.675	ARHGAP39	1	NO
ENSG00000273521	-1.401	0.378667	0.0166075	0.0483327	7.76901	9.09452	4.31157	12.8786	25.3844	17.8562	AL162274.1	1	NO
ENSG00000196139	-1.39973	0.379001	3.57e-08	3.99e-07	150.525	123.281	164.917	292.527	551.204	312.483	AKR1C3	1	NO
ENSG00000106789	-1.39732	0.379633	1.15e-05	8.08e-05	24.2782	45.4726	66.8293	119.587	122.389	116.065	CORO2A	1	NO
ENSG00000258701	-1.39548	0.380118	0.00111473	0.00479297	10.6824	15.1575	18.3242	52.4341	31.7305	31.2483	LINC00638	1	NO
ENSG00000184500	-1.39446	0.380386	4.05e-30	3.98e-28	314.645	283.951	367.561	825.148	845.844	867.139	PROS1	1	NO
ENSG00000186868	-1.39125	0.381234	2.3e-06	1.89e-05	23.307	44.4621	29.1031	86.4703	81.5926	85.9327	MAPT	1	NO
ENSG00000251079	-1.38899	0.381832	0.000666525	0.00306381	12.6246	13.1365	14.0126	34.9561	40.7963	27.9002	BMS1P2	1	NO
ENSG00000188596	-1.38285	0.383461	0.00177767	0.00713176	10.6824	16.168	9.70102	29.4367	26.291	40.1763	CFAP54	1	NO
ENSG00000144452	-1.38146	0.383831	1.61e-26	1.24e-24	369.028	379.949	288.875	907.939	857.629	941.912	ABCA12	1	NO
ENSG00000153944	-1.37639	0.385181	2.45e-47	7.03e-45	649.684	644.7	588.529	1648.46	1533.94	1709.73	MSI2	1	NO
ENSG00000180537	-1.37249	0.386223	3.87e-07	3.66e-06	44.6718	40.4201	74.3745	130.625	158.652	121.645	RNF182	1	NO
ENSG00000235750	-1.36892	0.387181	6.19e-11	1.04e-09	67.9789	111.155	75.4524	224.455	212.141	220.97	KIAA0040	1	NO
ENSG00000173868	-1.36353	0.38863	7.33e-05	0.000430617	29.1338	24.2521	62.5177	91.9897	97.9112	107.137	PHOSPHO1	1	NO
ENSG00000166589	-1.359	0.389852	5.49e-20	2.59e-18	144.698	132.376	130.425	345.881	320.931	380.559	CDH16	1	NO
ENSG00000137965	-1.35702	0.390387	1.07e-18	4.4e-17	282.598	223.321	337.38	705.561	704.416	748.842	IFI44	1	NO
ENSG00000197467	-1.35228	0.391672	0.0119484	0.0366918	5.82676	6.06301	16.1684	26.677	20.8515	23.4362	COL13A1	1	NO
ENSG00000123243	-1.3512	0.391966	2.05e-19	9.18e-18	738.056	784.15	542.179	1762.52	1587.43	1920.65	ITIH5	1	NO
ENSG00000164099	-1.35116	0.391977	6.82e-15	1.86e-13	75.7479	84.8822	81.9197	207.897	196.729	214.274	PRSS12	1	NO
ENSG00000265018	-1.35017	0.392245	0.00919549	0.0294305	9.71127	10.105	5.38946	22.9974	17.2251	24.5522	AGAP12P	1	NO
ENSG00000159388	-1.3461	0.393354	3.79e-06	2.97e-05	183.543	198.058	206.955	409.354	780.57	304.671	BTG2	1	NO
ENSG00000118432	-1.34449	0.393793	3e-12	5.95e-11	72.8345	58.6091	77.6082	180.3	169.531	180.794	CNR1	1	NO
ENSG00000164849	-1.3443	0.393844	0.00351741	0.0128878	14.5669	8.08402	10.7789	34.9561	25.3844	24.5522	GPR146	1	NO
ENSG00000221890	-1.33607	0.396098	4.56e-30	4.45e-28	284.54	307.193	331.991	796.631	718.922	815.803	NPTXR	1	NO
ENSG00000234184	-1.33236	0.397118	7.61e-05	0.000445389	26.2204	19.1995	22.6357	44.1551	59.8346	68.0766	LINC01781	1	NO
ENSG00000259345	-1.33032	0.397679	0.00291158	0.010931	12.6246	8.08402	20.4799	28.5168	33.5436	41.2923	AC013652.1	1	NO
ENSG00000138061	-1.32896	0.398054	1.31e-46	3.24e-44	5214.95	5340.5	6235.6	14349.5	14230.7	13597.5	CYP1B1	1	NO
ENSG00000163082	-1.32783	0.398367	6.93e-06	5.13e-05	46.6141	39.4096	84.0755	126.946	167.718	130.573	SGPP2	1	NO
ENSG00000092929	-1.32738	0.398492	0.000305132	0.00153657	12.6246	27.2836	35.5704	59.7933	67.0873	61.3805	UNC13D	1	NO
ENSG00000228412	-1.32404	0.399416	0.000758698	0.00342966	14.5669	12.126	26.9473	44.1551	48.9556	40.1763	AL022068.1	1	NO
ENSG00000233695	-1.32264	0.399803	1.06e-10	1.73e-09	82.5458	66.6932	70.0629	173.861	162.279	214.274	GAS6-AS1	1	NO
ENSG00000166313	-1.32183	0.400028	2.49e-12	4.99e-11	83.5169	121.26	120.724	264.93	250.217	297.975	APBB1	1	NO
ENSG00000008311	-1.32052	0.400391	5.41e-25	3.67e-23	268.031	254.647	216.656	598.853	593.813	657.33	AASS	1	NO
ENSG00000182224	-1.31661	0.401478	1.37e-06	1.17e-05	48.5563	36.3781	30.181	104.868	81.5926	101.557	CYB5D1	1	NO
ENSG00000273036	-1.30345	0.405156	2.3e-05	0.000150375	23.307	24.2521	28.0252	56.1137	57.1148	73.6566	AL390726.5	1	NO
ENSG00000065357	-1.30114	0.405804	1.68e-07	1.68e-06	46.6141	39.4096	34.4925	107.628	89.7519	100.441	DGKA	1	NO
ENSG00000215374	-1.29865	0.406507	0.0111059	0.0344424	12.6246	9.09452	7.54524	22.0775	17.2251	33.4803	FAM66B	1	NO
ENSG00000165912	-1.29726	0.406899	1.38e-12	2.89e-11	161.207	165.722	251.149	473.747	446.04	498.856	PACSIN3	1	NO
ENSG00000159496	-1.29644	0.407131	0.00507083	0.0176716	12.6246	13.1365	6.46735	27.5969	26.291	25.6682	RGL4	1	NO
ENSG00000212127	-1.29389	0.40785	0.00982507	0.0310457	13.5958	8.08402	14.0126	36.7959	16.3185	34.5963	TAS2R14	1	NO
ENSG00000233237	-1.29133	0.408574	1.39e-06	1.19e-05	59.2387	42.4411	31.2589	107.628	103.351	116.065	LINC00472	1	NO
ENSG00000102904	-1.29073	0.408744	0.00675788	0.0225373	13.5958	7.07352	25.8694	33.1163	33.5436	46.8724	TSNAXIP1	1	NO
ENSG00000215105	-1.28987	0.408987	2.25e-11	3.99e-10	59.2387	64.6721	68.985	155.463	161.372	154.009	TTC3P1	1	NO
ENSG00000260244	-1.28958	0.40907	2.04e-06	1.69e-05	32.0472	28.2941	35.5704	78.1913	85.219	70.3086	AC104083.1	1	NO
ENSG00000172061	-1.28952	0.409088	9.08e-05	0.000519488	22.3359	19.1995	21.5578	44.1551	53.4885	56.9165	LRRC15	1	NO
ENSG00000162496	-1.2888	0.409292	2.97e-47	8.38e-45	887.61	847.811	984.115	2243.63	2188.5	2209.7	DHRS3	1	NO
ENSG00000268912	-1.28776	0.409588	0.0075118	0.0247061	13.5958	11.1155	6.46735	22.0775	23.5712	31.2483	AC012313.5	1	NO
ENSG00000135899	-1.28571	0.41017	3.46e-14	8.89e-13	99.0549	99.0292	111.023	270.45	260.19	220.97	SP110	1	NO
ENSG00000187994	-1.27616	0.412892	9.26e-05	0.000528359	21.3648	21.2205	19.402	46.9148	48.9556	54.6845	RINL	1	NO
ENSG00000218336	-1.27386	0.413551	5.42e-66	6.29e-63	4087.47	4142.05	4232.88	10424.3	9414.88	10296.3	TENM3	1	NO
ENSG00000185745	-1.2709	0.4144	1.42e-32	1.74e-30	394.277	371.865	446.247	979.691	989.084	954.188	IFIT1	1	NO
ENSG00000269843	-1.26583	0.415861	0.00255348	0.0097711	17.4803	10.105	25.8694	40.4755	34.4502	53.5685	AC008537.2	1	NO
ENSG00000230487	-1.26477	0.416167	4.87e-19	2.06e-17	145.669	165.722	184.319	380.837	396.178	412.923	PSMG3-AS1	1	NO
ENSG00000154898	-1.26452	0.416236	0.0113391	0.0350885	11.6535	7.07352	10.7789	23.9173	17.2251	30.1323	CCDC144CP	1	NO
ENSG00000106006	-1.26347	0.416541	1.72e-07	1.72e-06	42.7296	42.4411	44.1935	95.6693	95.1914	120.529	HOXA6	1	NO
ENSG00000106976	-1.2604	0.417429	3.86e-34	5.17e-32	2405.48	2359.52	2676.4	5941.62	5356.1	6529.77	DNM1	1	NO
ENSG00000223829	-1.26034	0.417445	0.002072	0.0081501	13.5958	13.1365	15.0905	35.876	38.0766	25.6682	AC004870.2	1	NO
ENSG00000143878	-1.25755	0.418252	1.33e-13	3.15e-12	994.434	1035.76	1593.12	2877.44	2897.45	2884.88	RHOB	1	NO
ENSG00000137877	-1.25525	0.418921	2.16e-05	0.000142521	52.4408	44.4621	102.4	165.582	146.867	161.821	SPTBN5	1	NO
ENSG00000274180	-1.25137	0.420049	1.36e-11	2.49e-10	98.0838	97.0082	90.5429	253.892	190.383	236.594	NATD1	1	NO
ENSG00000175567	-1.24881	0.420795	7.7e-23	4.52e-21	974.04	947.851	1235.26	2476.36	2315.42	2709.67	UCP2	1	NO
ENSG00000223703	-1.24855	0.42087	9.04e-05	0.000517658	32.0472	46.4831	25.8694	79.1112	65.2741	104.905	AC027612.1	1	NO
ENSG00000119699	-1.24746	0.42119	0.000604065	0.0028111	28.1627	19.1995	53.8946	72.6719	90.6585	75.8886	TGFB3	1	NO
ENSG00000177374	-1.24594	0.421634	6.14e-05	0.000367331	31.0761	20.21	33.4146	57.9535	66.1807	77.0046	HIC1	1	NO
ENSG00000172264	-1.24418	0.422149	3.23e-31	3.49e-29	865.274	803.349	1015.37	2091.85	2098.74	2165.06	MACROD2	1	NO
ENSG00000130513	-1.24166	0.422886	1.83e-13	4.24e-12	134.987	139.449	116.412	270.45	350.848	303.555	GDF15	1	NO
ENSG00000184619	-1.24033	0.423275	0.0154858	0.0455597	9.71127	6.06301	9.70102	22.0775	19.0383	18.9722	KRBA2	1	NO
ENSG00000261879	-1.23937	0.423557	0.00134413	0.0056159	16.5092	15.1575	26.9473	35.876	44.4227	58.0325	AC087500.1	1	NO
ENSG00000272896	-1.2382	0.4239	0.0046172	0.0162854	14.5669	11.1155	16.1684	34.0362	22.6646	42.4084	AL355987.3	1	NO
ENSG00000177822	-1.23684	0.424301	4.25e-18	1.64e-16	204.908	191.995	211.267	509.623	413.403	511.132	AC098864.1	1	NO
ENSG00000141401	-1.23476	0.424913	3.22e-41	6.33e-39	724.46	788.192	824.587	1871.07	1749.71	1878.24	IMPA2	1	NO
ENSG00000149150	-1.23411	0.425105	5.52e-09	7.04e-08	54.3831	71.7457	59.284	150.863	130.548	155.125	SLC43A1	1	NO
ENSG00000163075	-1.2225	0.428539	1.15e-09	1.61e-08	79.6324	74.7772	58.2061	152.703	174.064	170.749	CFAP221	1	NO
ENSG00000089847	-1.22239	0.428571	0.0155374	0.0456719	6.79789	13.1365	7.54524	21.1576	21.758	21.2042	ANKRD24	1	NO
ENSG00000163629	-1.21952	0.429425	1.07e-31	1.21e-29	5015.87	5086.87	4088.44	11272.4	10558.1	11220.4	PTPN13	1	NO
ENSG00000165300	-1.21525	0.430699	8.82e-20	4.09e-18	210.734	217.258	219.89	498.584	451.479	555.773	SLITRK5	1	NO
ENSG00000174599	-1.21461	0.430889	0.000136887	0.00074779	29.1338	20.21	42.0378	75.4316	63.4609	72.5406	TRAM1L1	1	NO
ENSG00000170439	-1.21455	0.430908	4.89e-08	5.35e-07	53.412	54.5671	73.2966	136.145	126.922	157.357	METTL7B	1	NO
ENSG00000108846	-1.20991	0.432294	5.45e-42	1.12e-39	1228.48	1235.84	1372.16	2838.8	2902.88	3132.64	ABCC3	1	NO
ENSG00000112852	-1.20769	0.43296	1.1e-05	7.81e-05	34.9606	32.3361	48.5051	80.951	81.5926	104.905	PCDHB2	1	NO
ENSG00000137070	-1.20606	0.43345	8.63e-05	0.000496965	26.2204	25.2626	21.5578	53.354	54.3951	61.3805	IL11RA	1	NO
ENSG00000268543	-1.20558	0.433596	0.0131342	0.0396347	9.71127	9.09452	8.62313	20.2377	20.8515	22.3202	AC012313.4	1	NO
ENSG00000196689	-1.20531	0.433677	1.17e-05	8.22e-05	28.1627	43.4516	50.6609	102.109	86.1256	92.6288	TRPV1	1	NO
ENSG00000100344	-1.20512	0.433734	6.34e-07	5.81e-06	42.7296	47.4936	66.8293	127.866	124.202	108.253	PNPLA3	1	NO
ENSG00000206190	-1.20501	0.433767	5.45e-28	4.73e-26	749.71	816.486	952.856	2004.46	1882.07	1917.3	ATP10A	1	NO
ENSG00000000971	-1.20323	0.4343	7.4e-47	1.92e-44	643.857	638.637	669.371	1516.91	1461.41	1515.54	CFH	1	NO
ENSG00000172889	-1.2021	0.434642	3.4e-20	1.62e-18	410.787	383.991	511.998	1022.01	943.755	1039	EGFL7	1	NO
ENSG00000215481	-1.20184	0.434721	0.00680951	0.0226742	9.71127	11.1155	15.0905	23.9173	26.291	32.3643	BCRP3	1	NO
ENSG00000266490	-1.20074	0.435052	6.73e-05	0.00039836	24.2782	34.3571	37.7262	59.7933	85.219	75.8886	AC127024.5	1	NO
ENSG00000237975	-1.20052	0.435119	2.01e-07	1.98e-06	67.0077	44.4621	49.583	126.026	117.856	127.225	FLG-AS1	1	NO
ENSG00000257151	-1.20048	0.435131	0.00015309	0.000828272	18.4514	28.2941	31.2589	55.1938	58.928	64.7285	PWAR6	1	NO
ENSG00000170525	-1.19742	0.436055	3.09e-23	1.87e-21	4329.28	4676.6	5767.8	11270.6	10617	11990.4	PFKFB3	1	NO
ENSG00000279192	-1.19716	0.436133	0.00144809	0.00598281	54.3831	40.4201	16.1684	86.4703	95.1914	73.6566	PWAR5	1	NO
ENSG00000169297	-1.19706	0.436164	1.7e-05	0.000114632	35.9317	37.3886	43.1157	83.7107	110.603	71.4246	NR0B1	1	NO
ENSG00000013016	-1.19215	0.437651	0.00172974	0.00697094	13.5958	17.1785	28.0252	48.7546	38.0766	46.8724	EHD3	1	NO
ENSG00000176046	-1.19102	0.437994	3.06e-10	4.69e-09	121.391	102.061	104.555	206.057	255.657	289.046	NUPR1	1	NO
ENSG00000186496	-1.19074	0.438079	0.00511547	0.0178051	17.4803	15.1575	8.62313	32.1964	28.1041	34.5963	ZNF396	1	NO
ENSG00000198569	-1.18946	0.438466	9.5e-05	0.000539957	35.9317	45.4726	21.5578	72.6719	81.5926	81.4687	SLC34A3	1	NO
ENSG00000128656	-1.18931	0.438514	1.18e-14	3.14e-13	134.987	136.418	176.774	340.362	337.25	342.615	CHN1	1	NO
ENSG00000267648	-1.18928	0.438521	0.00290005	0.0108974	10.6824	20.21	24.7915	47.8347	43.5161	34.5963	AC060766.5	1	NO
ENSG00000205560	-1.18352	0.440275	2.15e-06	1.77e-05	43.7007	59.6196	38.8041	110.388	96.098	117.181	CPT1B	1	NO
ENSG00000182621	-1.18254	0.440575	3.67e-07	3.49e-06	51.4697	82.8612	62.5177	137.985	168.625	139.501	PLCB1	1	NO
ENSG00000118997	-1.18168	0.440838	0.00439165	0.015581	9.71127	16.168	18.3242	33.1163	29.0107	37.9443	DNAH7	1	NO
ENSG00000178814	-1.18162	0.440855	1.5e-06	1.28e-05	44.6718	48.5041	48.5051	102.109	127.828	90.3968	OPLAH	1	NO
ENSG00000145934	-1.17347	0.443355	6.83e-43	1.46e-40	1120.68	1184.31	1254.67	2740.37	2548.41	2738.69	TENM2	1	NO
ENSG00000164116	-1.17229	0.443718	1.21e-20	6e-19	193.254	193.006	178.93	425.912	410.683	438.592	GUCY1A1	1	NO
ENSG00000099957	-1.17034	0.444316	0.000736581	0.0033422	24.2782	15.1575	32.3367	52.4341	50.7688	58.0325	P2RX6	1	NO
ENSG00000167740	-1.16668	0.445446	1.07e-13	2.57e-12	161.207	155.617	205.877	401.075	356.288	415.155	CYB5D2	1	NO
ENSG00000176728	-1.16504	0.445952	4.77e-06	3.66e-05	35.9317	42.4411	48.5051	103.948	98.8178	80.3527	TTTY14	1	NO
ENSG00000270605	-1.16394	0.446292	0.000109776	0.000613165	27.1915	26.2731	26.9473	54.2739	56.2083	70.3086	AL353622.1	1	NO
ENSG00000130768	-1.16343	0.446451	7.09e-05	0.000417303	34.9606	43.4516	35.5704	72.6719	110.603	71.4246	SMPDL3B	1	NO
ENSG00000271503	-1.16006	0.447494	0.000325566	0.0016261	20.3937	23.2416	22.6357	45.075	51.6753	51.3364	CCL5	1	NO
ENSG00000278175	-1.15721	0.448378	0.0025374	0.00971618	16.5092	13.1365	19.402	31.2765	38.9832	39.0603	GLIDR	1	NO
ENSG00000261298	-1.15645	0.448615	3.26e-07	3.14e-06	63.1232	44.4621	56.0504	120.507	113.323	131.689	AC122134.1	1	NO
ENSG00000224078	-1.15344	0.449551	1.36e-29	1.3e-27	451.574	408.243	466.727	1022.93	953.727	973.16	SNHG14	1	NO
ENSG00000151575	-1.15264	0.449801	2.07e-10	3.24e-09	74.7767	79.8297	73.2966	173.861	168.625	164.053	TEX9	1	NO
ENSG00000204388	-1.152	0.450001	0.00343702	0.0126371	1053.67	1101.45	2396.15	3570.12	3233.79	3308.97	HSPA1B	1	NO
ENSG00000255446	-1.15178	0.450071	0.00053979	0.00254137	19.4225	26.2731	19.402	52.4341	45.3292	46.8724	AP003064.2	1	NO
ENSG00000251432	-1.151	0.450314	3.64e-15	1.04e-13	229.186	170.775	208.033	422.233	462.358	466.492	AC108062.1	1	NO
ENSG00000230590	-1.14725	0.451485	3.78e-06	2.97e-05	42.7296	43.4516	35.5704	96.5892	91.5651	81.4687	FTX	1	NO
ENSG00000240445	-1.14719	0.451503	0.00451199	0.015964	30.1049	39.4096	10.7789	58.8734	61.6478	58.0325	FOXO3B	1	NO
ENSG00000242366	-1.14379	0.45257	5.1e-27	4.15e-25	389.422	404.201	441.935	940.135	854.91	934.1	UGT1A8	1	NO
ENSG00000133069	-1.13797	0.4544	0.00112765	0.00483992	32.0472	18.189	47.4272	62.553	71.6202	80.3527	TMCC2	1	NO
ENSG00000168564	-1.13693	0.454728	2.81e-13	6.39e-12	167.034	181.89	237.136	424.073	425.188	437.476	CDKN2AIP	1	NO
ENSG00000234537	-1.13455	0.455476	2.43e-07	2.38e-06	56.3253	49.5146	52.8167	104.868	123.296	120.529	AL354751.1	1	NO
ENSG00000205269	-1.13093	0.456622	1.84e-11	3.31e-10	147.611	108.124	127.191	294.367	258.377	286.814	TMEM170B	1	NO
ENSG00000100478	-1.12882	0.45729	0.000116709	0.000647398	38.8451	26.2731	48.5051	78.1913	74.34	95.9768	AP4S1	1	NO
ENSG00000214796	-1.12878	0.457302	0.0137957	0.0413503	7.76901	12.126	16.1684	28.5168	26.291	23.4362	AC098934.1	1	NO
ENSG00000259974	-1.12789	0.457583	0.00369863	0.0134562	21.3648	22.2311	12.9347	33.1163	38.9832	52.4524	LINC00261	1	NO
ENSG00000137801	-1.12417	0.458766	1.63e-15	4.84e-14	12885.9	13320.4	18650.8	32900.1	32554.6	32319.6	THBS1	1	NO
ENSG00000111319	-1.12413	0.458777	1.56e-07	1.58e-06	82.5458	80.8402	56.0504	161.902	144.147	174.097	SCNN1A	1	NO
ENSG00000179542	-1.12322	0.459067	1.5e-13	3.5e-12	168.976	154.607	137.97	363.359	306.426	337.035	SLITRK4	1	NO
ENSG00000110446	-1.12261	0.459261	0.00312705	0.0116468	13.5958	20.21	30.181	54.2739	41.7029	42.4084	SLC15A3	1	NO
ENSG00000213376	-1.12158	0.45959	0.0117875	0.0362768	13.5958	10.105	19.402	26.677	40.7963	25.6682	GAPDHP71	1	NO
ENSG00000165376	-1.1201	0.460061	2.81e-36	4.36e-34	691.442	764.95	756.68	1650.3	1548.45	1610.4	CLDN2	1	NO
ENSG00000267547	-1.11824	0.460655	0.00269473	0.0102397	18.4514	13.1365	26.9473	41.3954	41.7029	43.5244	AC060766.4	1	NO
ENSG00000073910	-1.11737	0.460932	5.61e-05	0.000338938	45.6429	57.5986	31.2589	108.548	99.7243	83.7007	FRY	1	NO
ENSG00000082458	-1.11703	0.461041	0.000196635	0.00103601	25.2493	52.5461	50.6609	85.5505	100.631	91.5128	DLG3	1	NO
ENSG00000260274	-1.11592	0.461397	0.0102137	0.0320877	8.74014	16.168	25.8694	36.7959	33.5436	39.0603	AC068338.2	1	NO
ENSG00000118785	-1.11552	0.461525	1.11e-46	2.8e-44	4183.61	4030.89	4518.52	8864.13	9476.53	9246.14	SPP1	1	NO
ENSG00000136247	-1.11538	0.461569	3.58e-16	1.16e-14	296.194	279.909	374.028	714.76	689.005	651.749	ZDHHC4	1	NO
ENSG00000184669	-1.10758	0.464072	0.00657786	0.0220287	15.538	12.126	20.4799	26.677	38.9832	37.9443	OR7E14P	1	NO
ENSG00000221995	-1.10641	0.464447	0.0106895	0.0333409	26.2204	9.09452	26.9473	55.1938	36.2634	42.4084	TIAF1	1	NO
ENSG00000139508	-1.10632	0.464477	6.06e-11	1.02e-09	103.911	95.9977	93.7766	195.018	213.047	225.434	SLC46A3	1	NO
ENSG00000120149	-1.10402	0.465218	1.21e-05	8.46e-05	45.6429	42.4411	63.5956	118.667	114.23	91.5128	MSX2	1	NO
ENSG00000265458	-1.09983	0.466573	0.00198025	0.00783662	23.307	21.2205	16.1684	35.876	48.9556	45.7564	AC132938.3	1	NO
ENSG00000159917	-1.09946	0.46669	0.000908681	0.00400588	25.2493	23.2416	20.4799	43.2352	46.2358	59.1485	ZNF235	1	NO
ENSG00000115129	-1.09585	0.467862	5.15e-06	3.92e-05	49.5275	68.7142	91.6208	152.703	140.521	154.009	TP53I3	1	NO
ENSG00000105048	-1.09199	0.469115	2.86e-24	1.82e-22	385.537	451.695	416.066	914.378	847.657	909.548	TNNT1	1	NO
ENSG00000230699	-1.08975	0.469842	2.86e-08	3.26e-07	79.6324	66.6932	65.7514	140.744	153.213	158.473	AL645608.3	1	NO
ENSG00000105877	-1.08896	0.470099	2.09e-05	0.00013841	55.3542	49.5146	33.4146	101.189	91.5651	102.673	DNAH11	1	NO
ENSG00000049130	-1.08743	0.470601	2.35e-44	5.43e-42	1385.8	1297.48	1402.34	2894.92	2979.04	2805.65	KITLG	1	NO
ENSG00000232774	-1.08703	0.47073	1.6e-10	2.55e-09	87.4014	101.05	95.9323	191.339	203.075	209.81	AL355916.1	1	NO
ENSG00000138587	-1.08572	0.471157	6.41e-13	1.39e-11	297.165	286.983	402.053	659.566	742.493	688.578	MNS1	1	NO
ENSG00000204311	-1.08465	0.471506	0.00522079	0.0181195	17.4803	15.1575	16.1684	27.5969	37.17	39.0603	PJVK	1	NO
ENSG00000205707	-1.08366	0.471832	2.27e-12	4.62e-11	118.477	130.355	132.581	287.008	271.975	247.754	ETFRF1	1	NO
ENSG00000238273	-1.08185	0.472423	0.000339394	0.00168471	28.1627	25.2626	32.3367	54.2739	56.2083	71.4246	AC108058.1	1	NO
ENSG00000185829	-1.08063	0.472822	9.77e-05	0.000553718	41.7584	28.2941	44.1935	81.8709	70.7136	89.2808	ARL17A	1	NO
ENSG00000198846	-1.07781	0.473746	2.6e-22	1.46e-20	318.53	335.487	375.106	729.479	702.603	738.798	TOX	1	NO
ENSG00000112246	-1.07708	0.473987	7.05e-13	1.52e-11	208.792	283.951	210.189	492.145	485.93	505.552	SIM1	1	NO
ENSG00000197748	-1.07637	0.474219	0.00400844	0.0144273	22.3359	22.2311	19.402	44.1551	58.928	31.2483	CFAP43	1	NO
ENSG00000072840	-1.07345	0.47518	9.19e-22	4.97e-20	3413.51	3611.54	2843.48	7139.32	6385.98	7246.25	EVC	1	NO
ENSG00000160867	-1.07074	0.476075	3.28e-27	2.71e-25	1066.3	1149.95	1271.91	2382.53	2349.87	2593.61	FGFR4	1	NO
ENSG00000008086	-1.06959	0.476454	3.19e-19	1.39e-17	2293.8	2210.98	1747.26	4600.41	4117.71	4407.12	CDKL5	1	NO
ENSG00000231187	-1.0669	0.477344	0.000776816	0.00349807	31.0761	20.21	24.7915	55.1938	49.8622	54.6845	AL356056.2	1	NO
ENSG00000182752	-1.06489	0.478008	0.00198546	0.00785354	17.4803	22.2311	26.9473	40.4755	45.3292	53.5685	PAPPA	1	NO
ENSG00000256061	-1.06038	0.479507	0.00622336	0.0210334	20.3937	14.147	26.9473	33.1163	41.7029	53.5685	DNAAF4	1	NO
ENSG00000119862	-1.05997	0.479642	1.3e-09	1.82e-08	83.5169	86.9032	93.7766	179.38	193.103	177.445	LGALSL	1	NO
ENSG00000104783	-1.058	0.480298	0.0161579	0.0472246	14.5669	13.1365	38.8041	45.9949	42.6095	49.1044	KCNN4	1	NO
ENSG00000179023	-1.05282	0.482026	9.67e-14	2.32e-12	220.446	289.004	292.109	549.179	531.259	581.441	KLHDC7A	1	NO
ENSG00000152527	-1.05216	0.482246	6.22e-10	9.13e-09	168.976	142.481	117.49	276.889	310.959	303.555	PLEKHH2	1	NO
ENSG00000109654	-1.04856	0.483451	3.85e-12	7.52e-11	279.684	271.825	211.267	520.662	477.77	582.557	TRIM2	1	NO
ENSG00000226711	-1.04832	0.483531	0.00937725	0.0298877	15.538	17.1785	21.5578	43.2352	43.5161	24.5522	FAM66C	1	NO
ENSG00000214517	-1.04751	0.483801	1.16e-15	3.53e-14	1690.73	1765.35	2299.14	4155.18	3682.55	4055.58	PPME1	1	NO
ENSG00000265185	-1.04441	0.484845	0.000623295	0.00289104	26.2204	51.5356	59.284	95.6693	99.7243	85.9327	SNORD3B-1	1	NO
ENSG00000256542	-1.04277	0.485394	0.00595761	0.020277	13.5958	18.189	20.4799	37.7158	38.0766	31.2483	AC148477.2	1	NO
ENSG00000205336	-1.03901	0.486661	4.28e-17	1.52e-15	4737.16	5269.77	6507.23	11338.7	10807.4	11785.1	ADGRG1	1	NO
ENSG00000109610	-1.03892	0.486691	6.67e-11	1.12e-09	151.496	149.554	182.164	359.68	291.014	341.499	SOD3	1	NO
ENSG00000166263	-1.03879	0.486735	8.51e-16	2.65e-14	299.107	244.542	300.732	551.018	612.851	570.281	STXBP4	1	NO
ENSG00000241684	-1.03778	0.487076	0.0107329	0.0334461	33.0183	14.147	15.0905	45.9949	38.9832	43.5244	ADAMTS9-AS2	1	NO
ENSG00000110042	-1.03198	0.489038	5.84e-08	6.32e-07	76.719	69.7247	85.1534	164.662	146.867	161.821	DTX4	1	NO
ENSG00000263142	-1.03003	0.489701	8.77e-17	3.04e-15	218.503	214.226	194.02	425.912	423.375	431.896	LRRC37A17P	1	NO
ENSG00000138639	-1.0265	0.4909	4.5e-07	4.21e-06	59.2387	67.7037	63.5956	129.706	121.482	137.269	ARHGAP24	1	NO
ENSG00000169071	-1.02583	0.491128	5.83e-14	1.45e-12	288.425	337.508	268.395	548.259	617.384	657.33	ROR2	1	NO
ENSG00000154265	-1.02426	0.491661	3.87e-05	0.000241381	90.3148	69.7247	46.3493	141.664	143.24	136.153	ABCA5	1	NO
ENSG00000233198	-1.0157	0.494588	0.000797149	0.00357385	33.0183	33.3466	21.5578	60.7132	61.6478	55.8005	RNF224	1	NO
ENSG00000213420	-1.01507	0.494805	1.73e-05	0.000116813	44.6718	48.5041	40.9599	88.3101	91.5651	91.5128	GPC2	1	NO
ENSG00000162174	-1.01405	0.495154	2.52e-06	2.05e-05	108.766	109.134	177.852	272.29	284.668	239.942	ASRGL1	1	NO
ENSG00000174928	-1.014	0.495173	0.000583039	0.00272225	52.4408	38.3991	87.3092	108.548	124.202	126.109	C3orf33	1	NO
ENSG00000132837	-1.01171	0.495957	4.26e-07	4e-06	84.488	87.9137	70.0629	153.623	149.587	187.49	DMGDH	1	NO
ENSG00000164675	-1.01052	0.496366	3.84e-05	0.00024028	42.7296	40.4201	51.7388	81.8709	97.9112	91.5128	IQUB	1	NO
ENSG00000217648	-1.00716	0.497525	0.00073358	0.00332948	47.5852	67.7037	117.49	143.504	162.279	160.705	AL136116.3	1	NO
ENSG00000250327	-1.007	0.497579	0.00905342	0.0290417	15.538	17.1785	32.3367	45.075	37.17	47.9884	RPSAP70	1	NO
ENSG00000001617	-1.00556	0.498077	3.15e-29	2.94e-27	1321.7	1495.54	1530.61	2838.8	2873.87	3015.46	SEMA3F	1	NO
ENSG00000167536	-1.00285	0.499012	2.39e-07	2.34e-06	105.853	133.386	132.581	226.295	218.487	301.323	DHRS13	1	NO
ENSG00000140057	-1.00173	0.499402	0.00775034	0.0253427	17.4803	18.189	18.3242	42.3153	29.0107	36.8283	AK7	1	NO
ENSG00000128394	-1.00166	0.499425	8.77e-06	6.36e-05	70.8922	50.5251	70.0629	122.346	143.24	117.181	APOBEC3F	1	NO
ENSG00000235513	-0.995266	0.501644	0.0123505	0.0377038	11.6535	18.189	22.6357	30.3566	38.0766	35.7123	AL035681.1	1	NO
ENSG00000228262	-0.992965	0.502444	6.42e-15	1.77e-13	237.926	222.311	255.46	447.07	466.891	511.132	LINC01320	1	NO
ENSG00000154928	-0.99296	0.502446	2.5e-07	2.44e-06	77.6901	65.6826	84.0755	147.184	152.306	152.893	EPHB1	1	NO
ENSG00000115290	-0.989509	0.503649	1.02e-17	3.8e-16	265.118	293.046	283.485	557.458	582.934	528.988	GRB14	1	NO
ENSG00000114638	-0.989503	0.503651	2.49e-06	2.03e-05	57.2965	68.7142	71.1408	124.186	122.389	145.081	UPK1B	1	NO
ENSG00000185477	-0.986691	0.504634	4.13e-12	8.05e-11	274.829	224.332	204.799	479.267	464.171	453.1	GPRIN3	1	NO
ENSG00000152779	-0.986651	0.504648	6.94e-10	1.01e-08	175.774	151.575	128.269	297.127	291.014	316.947	SLC16A12	1	NO
ENSG00000183935	-0.984904	0.505259	0.000457429	0.00220081	36.9028	31.3256	51.7388	76.3515	71.6202	89.2808	HTR7P1	1	NO
ENSG00000088538	-0.984377	0.505444	0.00183586	0.00733807	23.307	33.3466	48.5051	65.3127	66.1807	75.8886	DOCK3	1	NO
ENSG00000161149	-0.984142	0.505526	0.01119	0.0346841	18.4514	12.126	21.5578	33.1163	36.2634	33.4803	TUBA3FP	1	NO
ENSG00000150667	-0.983607	0.505714	0.0100251	0.0315834	15.538	30.3151	16.1684	42.3153	38.0766	42.4084	FSIP1	1	NO
ENSG00000282164	-0.983389	0.50579	0.0098222	0.0310453	14.5669	23.2416	18.3242	33.1163	33.5436	44.6404	PEG13	1	NO
ENSG00000234460	-0.981612	0.506414	0.0053574	0.0185441	23.307	20.21	36.6483	57.0336	40.7963	60.2645	AL772337.3	1	NO
ENSG00000171791	-0.978043	0.507668	1.34e-13	3.18e-12	425.353	437.547	328.757	809.51	786.009	753.306	BCL2	1	NO
ENSG00000196535	-0.977399	0.507895	6.55e-23	3.88e-21	764.277	847.811	890.338	1680.65	1540.29	1705.26	MYO18A	1	NO
ENSG00000270959	-0.973947	0.509111	4.08e-05	0.000253428	61.181	66.6932	91.6208	138.904	121.482	170.749	LPP-AS2	1	NO
ENSG00000168779	-0.973207	0.509373	2.83e-16	9.23e-15	239.868	249.594	277.018	510.543	501.341	491.044	SHOX2	1	NO
ENSG00000126803	-0.973	0.509446	3.95e-07	3.73e-06	85.4591	95.9977	109.945	184.899	216.674	168.517	HSPA2	1	NO
ENSG00000205213	-0.972779	0.509524	2.1e-27	1.76e-25	605.012	612.364	563.737	1158.15	1147.74	1191.9	LGR4	1	NO
ENSG00000267102	-0.96709	0.511537	1.03e-05	7.34e-05	58.2676	63.6616	61.4398	103.948	135.988	118.297	AC060766.1	1	NO
ENSG00000164920	-0.961095	0.513667	0.000433115	0.00209517	36.9028	32.3361	45.2714	83.7107	66.1807	72.5406	OSR2	1	NO
ENSG00000101871	-0.960948	0.513719	3.25e-33	4.12e-31	1665.48	1547.08	1545.7	3172.73	2942.77	3149.38	MID1	1	NO
ENSG00000185339	-0.960708	0.513805	2.54e-09	3.41e-08	106.824	110.145	101.322	212.496	203.982	203.114	TCN2	1	NO
ENSG00000083857	-0.9603	0.51395	5.03e-17	1.78e-15	4190.41	3855.07	3173.31	7478.77	6926.31	7427.04	FAT1	1	NO
ENSG00000237819	-0.957301	0.515019	0.00046582	0.00223482	36.9028	32.3361	51.7388	83.7107	73.4334	77.0046	AC002454.1	1	NO
ENSG00000135697	-0.952714	0.51666	2.97e-05	0.000190769	47.5852	54.5671	68.985	114.067	107.884	108.253	BCO1	1	NO
ENSG00000147852	-0.950632	0.517406	1.58e-25	1.11e-23	2365.66	2511.1	2122.37	4639.96	4314.44	4575.64	VLDLR	1	NO
ENSG00000188707	-0.947032	0.518699	1.01e-11	1.89e-10	1402.31	1384.39	1931.58	2923.43	2978.13	3192.9	ZBED6CL	1	NO
ENSG00000164114	-0.946962	0.518724	1.87e-13	4.33e-12	375.826	345.592	445.169	742.357	799.608	704.202	MAP9	1	NO
ENSG00000079215	-0.946392	0.518929	6.83e-05	0.000403419	47.5852	66.6932	75.4524	121.426	108.79	135.037	SLC1A3	1	NO
ENSG00000264885	-0.945169	0.519369	0.00468741	0.0165124	33.0183	18.189	31.2589	57.9535	46.2358	54.6845	AC026271.3	1	NO
ENSG00000019144	-0.944752	0.519519	1.01e-27	8.51e-26	2549.21	2751.6	2952.34	5403.48	5046.05	5434.97	PHLDB1	1	NO
ENSG00000145476	-0.942488	0.520335	2.41e-20	1.17e-18	363.201	393.085	397.742	721.199	752.465	743.262	CYP4V2	1	NO
ENSG00000120885	-0.935656	0.522805	4.13e-10	6.26e-09	312.703	341.55	439.78	642.088	702.603	746.61	CLU	1	NO
ENSG00000176485	-0.934667	0.523163	1.98e-10	3.11e-09	221.417	184.922	255.46	425.912	410.683	427.432	PLA2G16	1	NO
ENSG00000108785	-0.933511	0.523583	0.0151263	0.0446888	28.1627	33.3466	12.9347	52.4341	49.8622	40.1763	HSD17B1P1	1	NO
ENSG00000186472	-0.932948	0.523787	4.01e-05	0.000249459	49.5275	56.5881	49.583	103.028	103.351	90.3968	PCLO	1	NO
ENSG00000164855	-0.93032	0.524742	7.77e-13	1.67e-11	397.191	363.781	483.973	789.272	760.625	821.383	TMEM184A	1	NO
ENSG00000143412	-0.925441	0.526519	0.00333029	0.0123051	37.8739	21.2205	31.2589	54.2739	55.3017	62.4965	ANXA9	1	NO
ENSG00000132274	-0.9214	0.527996	1.67e-18	6.75e-17	683.673	704.32	591.762	1212.42	1220.26	1320.24	TRIM22	1	NO
ENSG00000095539	-0.919288	0.52877	6.65e-05	0.000394537	58.2676	49.5146	52.8167	90.1499	100.631	113.833	SEMA4G	1	NO
ENSG00000176974	-0.918638	0.529008	1.74e-18	7.04e-17	1532.44	1598.61	1908.95	3157.09	3091.45	3276.6	SHMT1	1	NO
ENSG00000203780	-0.917723	0.529344	3.3e-07	3.17e-06	97.1127	84.8822	112.101	178.46	192.196	184.142	FANK1	1	NO
ENSG00000274512	-0.917121	0.529565	2.45e-05	0.000159586	61.181	52.5461	65.7514	110.388	106.07	122.761	TBC1D3L	1	NO
ENSG00000230982	-0.917046	0.529592	0.00826753	0.0268417	23.307	22.2311	22.6357	40.4755	35.3568	53.5685	DSTNP1	1	NO
ENSG00000165804	-0.917021	0.529601	2.24e-07	2.2e-06	116.535	119.239	153.061	245.613	219.394	268.958	ZNF219	1	NO
ENSG00000092421	-0.916597	0.529757	7.52e-16	2.35e-14	4311.8	4202.68	3386.73	7730.82	6946.25	7791.98	SEMA6A	1	NO
ENSG00000218537	-0.915943	0.529997	0.00362415	0.0132204	28.1627	29.3046	24.7915	50.5944	60.7412	43.5244	MIF-AS1	1	NO
ENSG00000134516	-0.906705	0.533402	2.98e-10	4.59e-09	560.34	617.417	810.574	1289.7	1242.93	1191.9	DOCK2	1	NO
ENSG00000160712	-0.906161	0.533603	3.69e-05	0.000232181	57.2965	57.5986	54.9725	99.3489	101.538	118.297	IL6R	1	NO
ENSG00000263934	-0.904477	0.534226	0.00527262	0.0182806	25.2493	22.2311	29.1031	53.354	40.7963	49.1044	SNORD3A	1	NO
ENSG00000204177	-0.903901	0.53444	7.73e-06	5.65e-05	234.042	185.932	130.425	353.241	328.184	350.427	BMS1P1	1	NO
ENSG00000140398	-0.90361	0.534548	0.000249074	0.00128271	98.0838	62.6511	117.49	156.383	162.279	201.998	NEIL1	1	NO
ENSG00000135525	-0.903064	0.53475	1.85e-18	7.4e-17	452.545	416.327	395.586	792.032	773.317	801.295	MAP7	1	NO
ENSG00000280187	-0.899508	0.536069	0.000188995	0.0009995	45.6429	54.5671	68.985	97.5091	100.631	117.181	AC022107.1	1	NO
ENSG00000242265	-0.898273	0.536529	1.07e-37	1.75e-35	13074.3	13447.8	14333.8	26033.1	24718	25394.8	PEG10	1	NO
ENSG00000283406	-0.896976	0.537011	0.00072908	0.00330994	35.9317	45.4726	33.4146	69.9122	71.6202	72.5406	AC007326.3	1	NO
ENSG00000241635	-0.896731	0.537102	1.09e-15	3.35e-14	393.306	330.434	377.262	689.923	689.005	670.722	UGT1A1	1	NO
ENSG00000175155	-0.896318	0.537256	5.7e-07	5.27e-06	140.813	146.523	100.244	245.613	239.338	237.71	YPEL2	1	NO
ENSG00000176771	-0.894921	0.537777	4.31e-08	4.76e-07	442.834	471.905	308.277	812.269	722.548	741.03	NCKAP5	1	NO
ENSG00000236618	-0.894	0.53812	0.000456215	0.0021956	35.9317	49.5146	43.1157	74.5117	80.6861	83.7007	PITPNA-AS1	1	NO
ENSG00000082438	-0.893733	0.53822	1e-32	1.23e-30	2589.02	2506.05	2346.57	4686.88	4655.31	4485.24	COBLL1	1	NO
ENSG00000167476	-0.892952	0.538511	0.000796379	0.00357229	45.6429	37.3886	32.3367	72.6719	70.7136	71.4246	JSRP1	1	NO
ENSG00000197077	-0.892591	0.538646	1.58e-11	2.87e-10	2072.38	2176.62	1573.72	3722.82	3338.05	3752.02	KIAA1671	1	NO
ENSG00000196814	-0.891263	0.539142	2.35e-14	6.12e-13	287.453	255.657	296.42	525.261	516.753	514.48	MVB12B	1	NO
ENSG00000047346	-0.889273	0.539886	4.01e-06	3.12e-05	217.532	188.964	129.347	321.044	352.662	320.295	FAM214A	1	NO
ENSG00000272462	-0.88766	0.54049	0.00172858	0.00696792	30.1049	30.3151	35.5704	56.1137	58.928	62.4965	U91328.1	1	NO
ENSG00000171016	-0.885491	0.541303	0.0003148	0.00157886	49.5275	53.5566	44.1935	103.028	91.5651	77.0046	PYGO1	1	NO
ENSG00000182612	-0.883703	0.541974	2.83e-06	2.28e-05	77.6901	87.9137	105.633	172.021	163.185	164.053	TSPAN10	1	NO
ENSG00000283366	-0.883625	0.542004	0.00816691	0.0265519	21.3648	28.2941	24.7915	42.3153	54.3951	40.1763	AC000095.2	1	NO
ENSG00000263272	-0.87928	0.543639	0.00812837	0.0264508	32.0472	22.2311	20.4799	45.075	47.1424	45.7564	AC004148.2	1	NO
ENSG00000253661	-0.876895	0.544538	0.00112227	0.00482172	51.4697	41.4306	76.5303	91.9897	106.977	111.601	ZFHX4-AS1	1	NO
ENSG00000165023	-0.875219	0.545171	9.14e-07	8.13e-06	217.532	223.321	153.061	319.204	387.112	385.023	DIRAS2	1	NO
ENSG00000172123	-0.874629	0.545394	2.98e-12	5.93e-11	354.461	352.665	446.247	698.202	708.043	706.434	SLFN12	1	NO
ENSG00000184898	-0.873187	0.545939	7.04e-09	8.85e-08	394.277	324.371	267.317	611.732	593.813	602.645	RBM43	1	NO
ENSG00000254413	-0.872751	0.546105	0.00570628	0.0195257	23.307	26.2731	26.9473	43.2352	49.8622	46.8724	CHKB-CPT1B	1	NO
ENSG00000163412	-0.872229	0.546302	4.28e-08	4.74e-07	207.821	188.964	164.917	299.887	349.035	381.675	EIF4E3	1	NO
ENSG00000103196	-0.871357	0.546632	1.28e-15	3.85e-14	640.944	683.1	779.315	1210.58	1283.72	1352.6	CRISPLD2	1	NO
ENSG00000038002	-0.867543	0.54808	1.09e-10	1.76e-09	301.049	262.731	323.367	525.261	499.528	594.833	AGA	1	NO
ENSG00000106004	-0.867461	0.548111	7.03e-07	6.39e-06	423.411	433.505	665.059	941.055	949.194	883.879	HOXA5	1	NO
ENSG00000151729	-0.866787	0.548367	5.45e-05	0.000330514	235.984	231.405	384.807	506.863	603.786	440.824	SLC25A4	1	NO
ENSG00000006282	-0.866727	0.548389	3.98e-20	1.89e-18	957.531	960.988	1036.93	1728.49	1717.07	1945.2	SPATA20	1	NO
ENSG00000265962	-0.865997	0.548667	0.00204153	0.00803491	31.0761	37.3886	30.181	60.7132	58.928	60.2645	GACAT2	1	NO
ENSG00000031003	-0.86525	0.548951	1.52e-28	1.36e-26	1131.36	1145.91	1175.98	2163.6	2016.24	2110.37	FAM13B	1	NO
ENSG00000198794	-0.864743	0.549144	1.57e-07	1.59e-06	223.359	196.037	293.186	451.67	412.496	431.896	SCAMP5	1	NO
ENSG00000137203	-0.863759	0.549519	3.67e-06	2.89e-05	88.3725	120.25	121.802	195.938	188.57	216.506	TFAP2A	1	NO
ENSG00000065534	-0.862143	0.550135	8.64e-19	3.56e-17	3484.4	3637.81	3045.04	6440.2	5758.63	6285.36	MYLK	1	NO
ENSG00000077585	-0.860405	0.550798	1.65e-11	2.99e-10	206.85	202.1	222.046	374.398	401.617	368.283	GPR137B	1	NO
ENSG00000173581	-0.859356	0.551199	8.27e-07	7.43e-06	148.582	127.323	190.787	282.408	277.415	285.698	CCDC106	1	NO
ENSG00000166347	-0.858489	0.55153	7.86e-05	0.000457217	132.073	95.9977	135.814	213.416	267.443	177.445	CYB5A	1	NO
ENSG00000166275	-0.856357	0.552346	5.82e-06	4.39e-05	163.149	130.355	215.578	306.326	302.799	311.367	BORCS7	1	NO
ENSG00000164039	-0.85614	0.552429	2.99e-07	2.89e-06	118.477	122.271	146.593	211.576	245.685	243.29	BDH2	1	NO
ENSG00000135828	-0.855461	0.552689	4.29e-09	5.55e-08	198.11	249.594	264.083	422.233	410.683	454.216	RNASEL	1	NO
ENSG00000173258	-0.853868	0.553299	0.00550771	0.0189881	33.9894	36.3781	22.6357	54.2739	61.6478	52.4524	ZNF483	1	NO
ENSG00000173786	-0.853827	0.553315	2.51e-11	4.44e-10	1995.67	2196.83	2766.95	4205.77	4010.73	4359.13	CNP	1	NO
ENSG00000130517	-0.852542	0.553808	1.18e-11	2.2e-10	327.27	307.193	279.174	521.582	528.539	602.645	PGPEP1	1	NO
ENSG00000142677	-0.848853	0.555226	0.00864744	0.0279249	21.3648	27.2836	32.3367	50.5944	42.6095	52.4524	IL22RA1	1	NO
ENSG00000074356	-0.848564	0.555337	4.49e-32	5.24e-30	1562.54	1560.22	1642.71	2894.92	2804.97	2880.42	NCBP3	1	NO
ENSG00000161664	-0.848484	0.555368	0.000462679	0.00222238	49.5275	52.5461	56.0504	84.6306	87.0322	113.833	ASB16	1	NO
ENSG00000169992	-0.847809	0.555628	1.03e-19	4.76e-18	1540.21	1650.15	1548.93	2816.73	2624.56	3091.35	NLGN2	1	NO
ENSG00000004975	-0.847604	0.555707	1.18e-21	6.31e-20	961.415	989.282	1058.49	1812.2	1712.54	1890.52	DVL2	1	NO
ENSG00000165695	-0.843056	0.557462	0.0139899	0.0418362	30.1049	20.21	22.6357	50.5944	38.0766	42.4084	AK8	1	NO
ENSG00000171861	-0.840319	0.55852	2.11e-05	0.00013969	248.608	242.521	406.365	534.46	519.473	551.309	MRM3	1	NO
ENSG00000121236	-0.839899	0.558683	3.89e-10	5.91e-09	368.057	302.14	410.677	631.05	661.807	640.589	TRIM6	1	NO
ENSG00000253846	-0.836383	0.560046	6.36e-05	0.000379315	73.8056	72.7562	60.3619	123.266	112.417	135.037	PCDHGA10	1	NO
ENSG00000127415	-0.835584	0.560356	8.43e-10	1.21e-08	274.829	271.825	217.734	441.551	445.133	479.884	IDUA	1	NO
ENSG00000183250	-0.835406	0.560425	0.000416618	0.00202701	53.412	43.4516	53.8946	82.7908	91.5651	94.8608	LINC01547	1	NO
ENSG00000119737	-0.834934	0.560609	0.00131507	0.00551271	57.2965	36.3781	47.4272	77.2714	88.8453	85.9327	GPR75	1	NO
ENSG00000013588	-0.833335	0.56123	1.19e-07	1.23e-06	314.645	295.067	414.988	572.176	675.406	575.861	GPRC5A	1	NO
ENSG00000260597	-0.831766	0.561841	0.0128175	0.0388108	57.2965	42.4411	22.6357	71.752	67.9939	79.2367	AC012531.1	1	NO
ENSG00000040633	-0.831307	0.56202	3e-06	2.41e-05	713.778	743.73	1160.89	1571.18	1483.17	1602.59	PHF23	1	NO
ENSG00000282057	-0.830373	0.562384	0.000124475	0.000687317	67.0077	56.5881	58.2061	114.067	109.697	99.3248	AC092807.3	1	NO
ENSG00000173890	-0.830157	0.562468	1.85e-18	7.4e-17	528.293	504.241	495.83	892.3	941.035	883.879	GPR160	1	NO
ENSG00000104447	-0.830007	0.562526	7.91e-11	1.31e-09	295.222	292.035	239.292	499.504	480.49	491.044	TRPS1	1	NO
ENSG00000100439	-0.829504	0.562723	7.61e-17	2.65e-15	448.66	471.905	476.428	842.626	783.289	857.095	ABHD4	1	NO
ENSG00000175772	-0.829054	0.562898	0.00219143	0.00856408	37.8739	32.3361	36.6483	60.7132	63.4609	65.8446	LINC01106	1	NO
ENSG00000132434	-0.828837	0.562983	7.38e-06	5.43e-05	461.285	455.737	738.356	995.329	921.09	1022.26	LANCL2	1	NO
ENSG00000163576	-0.827968	0.563322	9.65e-09	1.19e-07	154.409	155.617	145.515	286.088	259.283	263.378	EFHB	1	NO
ENSG00000273760	-0.827641	0.56345	0.000422895	0.00205219	100.997	119.239	175.696	211.576	208.515	282.35	AC245041.1	1	NO
ENSG00000242207	-0.82564	0.564232	0.000976172	0.00425897	77.6901	55.5776	98.0881	160.062	119.669	129.457	HOXB-AS4	1	NO
ENSG00000151364	-0.82499	0.564486	0.000286717	0.00145835	61.181	56.5881	85.1534	125.106	121.482	111.601	KCTD14	1	NO
ENSG00000230359	-0.824891	0.564525	0.00315151	0.0117224	41.7584	39.4096	64.6735	86.4703	73.4334	98.2088	TPI1P2	1	NO
ENSG00000145217	-0.821369	0.565905	2.17e-10	3.39e-09	281.627	299.109	322.29	537.22	477.77	581.441	SLC26A1	1	NO
ENSG00000164543	-0.819826	0.56651	2.4e-16	7.91e-15	3177.53	3181.06	3865.32	6014.29	6115.82	5913.73	STK17A	1	NO
ENSG00000168538	-0.818559	0.567008	3.66e-15	1.04e-13	453.516	519.398	487.207	845.386	901.145	826.963	TRAPPC11	1	NO
ENSG00000141542	-0.816973	0.567632	1.82e-07	1.81e-06	153.438	164.712	192.943	275.049	328.184	295.742	RAB40B	1	NO
ENSG00000253293	-0.81693	0.567649	1.44e-17	5.3e-16	1163.41	1231.8	1326.88	2208.67	2031.66	2316.84	HOXA10	1	NO
ENSG00000132256	-0.814572	0.568577	1.2e-16	4.03e-15	661.337	591.144	619.788	1118.6	1033.51	1142.79	TRIM5	1	NO
ENSG00000204682	-0.813485	0.569006	4.15e-10	6.27e-09	416.613	417.337	538.946	821.468	771.504	818.035	CASC10	1	NO
ENSG00000116663	-0.813389	0.569044	0.00027098	0.00138581	100.026	71.7457	128.269	181.22	178.597	166.285	FBXO6	1	NO
ENSG00000095739	-0.812572	0.569366	8.4e-08	8.9e-07	582.676	643.69	865.547	1213.34	1166.77	1292.34	BAMBI	1	NO
ENSG00000184481	-0.810393	0.570226	1.63e-08	1.95e-07	199.081	179.869	163.839	322.884	298.266	332.571	FOXO4	1	NO
ENSG00000132840	-0.809859	0.570437	8.57e-12	1.62e-10	778.844	798.297	993.816	1544.51	1426.06	1534.51	BHMT2	1	NO
ENSG00000267493	-0.809392	0.570622	0.00350446	0.0128626	34.9606	36.3781	54.9725	78.1913	69.807	72.5406	CIRBP-AS1	1	NO
ENSG00000261305	-0.80893	0.570805	0.00166136	0.00673229	88.3725	59.6196	120.724	175.7	147.773	146.197	AC005586.2	1	NO
ENSG00000160588	-0.807977	0.571182	1.11e-06	9.71e-06	146.64	147.533	200.488	294.367	286.481	283.466	MPZL3	1	NO
ENSG00000166803	-0.805152	0.572302	3.46e-06	2.74e-05	547.715	613.375	892.494	1160.91	1261.97	1162.88	PCLAF	1	NO
ENSG00000023608	-0.803987	0.572764	3.75e-07	3.56e-06	186.456	138.439	177.852	287.928	302.799	286.814	SNAPC1	1	NO
ENSG00000197766	-0.803322	0.573028	0.000429676	0.00208265	68.95	70.7352	89.465	136.145	107.884	156.241	CFD	1	NO
ENSG00000164651	-0.802853	0.573214	2.9e-08	3.32e-07	174.803	177.848	214.5	344.961	311.865	331.455	SP8	1	NO
ENSG00000254122	-0.802685	0.573281	0.00271647	0.0103085	39.8162	59.6196	47.4272	92.9096	69.807	93.7448	PCDHGB7	1	NO
ENSG00000274307	-0.801107	0.573909	0.000605152	0.00281461	62.1521	48.5041	60.3619	111.308	97.9112	88.1647	AC023449.2	1	NO
ENSG00000269486	-0.799286	0.574633	0.000302413	0.00152852	101.968	64.6721	75.4524	130.625	143.24	148.429	ERVK9-11	1	NO
ENSG00000149809	-0.799048	0.574728	7.5e-05	0.000439316	84.488	86.9032	123.958	177.54	168.625	166.285	TM7SF2	1	NO
ENSG00000141736	-0.795823	0.576014	3.47e-18	1.34e-16	2013.15	2089.72	2176.26	3590.36	3360.71	3951.79	ERBB2	1	NO
ENSG00000018408	-0.792067	0.577516	1.45e-34	2.02e-32	7532.06	7501.97	7939.75	13201.4	13569.8	13006	WWTR1	1	NO
ENSG00000268812	-0.791417	0.577776	0.0155166	0.0456276	56.3253	55.5776	26.9473	62.553	85.219	93.7448	AC004264.1	1	NO
ENSG00000280351	-0.791316	0.577817	0.0012383	0.0052259	121.391	134.397	231.747	268.61	252.937	321.411	AC127496.7	1	NO
ENSG00000100058	-0.790817	0.578017	1.54e-05	0.000104712	121.391	123.281	175.696	242.853	237.525	245.522	CRYBB2P1	1	NO
ENSG00000175471	-0.789164	0.578679	4.19e-14	1.06e-12	403.989	426.432	390.197	701.882	672.686	736.566	MCTP1	1	NO
ENSG00000262879	-0.789025	0.578735	1.6e-09	2.21e-08	205.879	225.342	195.098	367.039	368.98	345.963	AC068152.1	1	NO
ENSG00000083457	-0.788753	0.578844	3.42e-06	2.71e-05	347.663	284.962	451.636	610.812	592	669.606	ITGAE	1	NO
ENSG00000180592	-0.78776	0.579243	9.11e-05	0.000520646	71.8634	78.8192	77.6082	126.026	147.773	119.413	SKIDA1	1	NO
ENSG00000256294	-0.787736	0.579253	0.000332968	0.00165763	75.7479	55.5776	84.0755	118.667	127.828	124.993	ZNF225	1	NO
ENSG00000229028	-0.786123	0.5799	6.78e-08	7.26e-07	163.149	180.88	147.671	283.328	276.508	289.046	KRT223P	1	NO
ENSG00000104835	-0.783987	0.58076	1.83e-06	1.53e-05	115.564	137.428	142.282	237.334	208.515	234.362	SARS2	1	NO
ENSG00000272382	-0.783697	0.580877	0.00797668	0.0260073	37.8739	28.2941	34.4925	52.4341	67.0873	53.5685	AC025171.5	1	NO
ENSG00000101333	-0.782763	0.581253	7.92e-31	8.26e-29	3067.79	2988.06	3198.1	5330.8	5214.68	5374.7	PLCB4	1	NO
ENSG00000129197	-0.782427	0.581388	3.6e-10	5.5e-09	270.944	244.542	258.694	441.551	415.216	476.536	RPAIN	1	NO
ENSG00000164761	-0.782032	0.581547	0.0138946	0.0416025	33.0183	52.5461	38.8041	59.7933	94.2848	59.1485	TNFRSF11B	1	NO
ENSG00000205413	-0.781851	0.58162	3.58e-22	1.98e-20	1055.61	996.355	972.258	1720.21	1765.12	1715.31	SAMD9	1	NO
ENSG00000143434	-0.780983	0.58197	9.23e-06	6.65e-05	136.929	122.271	158.45	222.615	221.207	274.538	SEMA6C	1	NO
ENSG00000164093	-0.779712	0.582483	6.15e-10	9.02e-09	271.915	318.308	327.679	515.142	500.435	560.237	PITX2	1	NO
ENSG00000165655	-0.779556	0.582546	1.64e-09	2.26e-08	548.687	612.364	748.057	1066.16	1131.42	1076.95	ZNF503	1	NO
ENSG00000127804	-0.778335	0.583039	2.21e-10	3.46e-09	734.172	862.969	989.504	1463.56	1530.32	1439.65	METTL16	1	NO
ENSG00000119938	-0.77524	0.584291	4.98e-06	3.8e-05	95.1704	103.071	111.023	177.54	175.877	175.213	PPP1R3C	1	NO
ENSG00000120075	-0.774664	0.584525	9.49e-06	6.82e-05	141.784	146.523	187.553	236.414	295.547	281.234	HOXB5	1	NO
ENSG00000090776	-0.774198	0.584714	1.17e-08	1.43e-07	249.58	240.5	293.186	455.349	409.776	474.304	EFNB1	1	NO
ENSG00000134901	-0.773843	0.584858	1.75e-21	9.21e-20	889.552	911.473	959.323	1598.78	1566.58	1552.37	KDELC1	1	NO
ENSG00000175806	-0.773265	0.585092	0.00288034	0.0108378	54.3831	53.5566	87.3092	112.227	96.098	124.993	MSRA	1	NO
ENSG00000166446	-0.772293	0.585486	0.00249462	0.00958057	50.4986	58.6091	46.3493	92.9096	101.538	70.3086	CDYL2	1	NO
ENSG00000164040	-0.771854	0.585664	2.08e-25	1.45e-23	4548.76	4550.29	5029.44	8064.74	8106.68	7949.33	PGRMC2	1	NO
ENSG00000172250	-0.770569	0.586186	0.0144298	0.0429672	26.2204	56.5881	50.6609	80.951	67.0873	79.2367	SERHL	1	NO
ENSG00000171953	-0.767954	0.58725	5.91e-06	4.45e-05	162.178	143.491	188.631	253.892	269.256	319.179	ATPAF2	1	NO
ENSG00000125968	-0.767903	0.58727	2.83e-09	3.76e-08	5086.76	5317.26	7045.1	9956.05	9665.1	10088.7	ID1	1	NO
ENSG00000280303	-0.766591	0.587805	0.0107829	0.0335764	39.8162	32.3361	50.6609	80.0311	75.2465	52.4524	ERICD	1	NO
ENSG00000101004	-0.765965	0.58806	6.71e-10	9.79e-09	343.779	375.907	333.068	577.696	552.11	662.91	NINL	1	NO
ENSG00000003249	-0.765659	0.588185	3.68e-08	4.1e-07	227.244	265.762	265.161	409.354	400.711	479.884	DBNDD1	1	NO
ENSG00000176422	-0.764744	0.588558	2.53e-06	2.06e-05	135.958	151.575	183.242	255.731	261.096	282.35	SPRYD4	1	NO
ENSG00000070159	-0.762405	0.589513	1.26e-20	6.25e-19	2019.94	2099.82	1977.93	3593.12	3215.66	3536.63	PTPN3	1	NO
ENSG00000129187	-0.760851	0.590148	2.19e-09	2.96e-08	1136.22	1240.9	1565.1	2214.19	2190.31	2273.31	DCTD	1	NO
ENSG00000167447	-0.760296	0.590375	1.11e-11	2.06e-10	515.668	519.398	604.697	925.417	867.602	984.32	SMG8	1	NO
ENSG00000253187	-0.759478	0.59071	4.39e-08	4.84e-07	290.367	290.014	241.448	466.388	419.749	507.784	HOXA10-AS	1	NO
ENSG00000187240	-0.759433	0.590729	1.53e-06	1.3e-05	504.986	466.852	330.913	743.277	735.24	728.754	DYNC2H1	1	NO
ENSG00000171298	-0.758255	0.591211	5.77e-10	8.51e-09	584.618	619.438	482.895	940.135	1009.94	903.968	GAA	1	NO
ENSG00000183011	-0.757258	0.59162	0.000603609	0.00280975	443.805	466.852	847.223	1004.53	962.793	1002.18	NAA38	1	NO
ENSG00000206530	-0.756771	0.591819	0.00120154	0.00510133	82.5458	78.8192	54.9725	128.786	104.257	133.921	CFAP44	1	NO
ENSG00000275066	-0.755945	0.592159	2.96e-21	1.51e-19	1078.92	1104.48	1127.47	1799.32	1852.15	1940.74	SYNRG	1	NO
ENSG00000196911	-0.755581	0.592308	0.00017377	0.000926515	123.333	98.0187	79.764	163.742	174.064	171.865	KPNA5	1	NO
ENSG00000258048	-0.755357	0.5924	0.0021114	0.0082858	72.8345	70.7352	44.1935	103.948	101.538	112.717	AC073569.2	1	NO
ENSG00000127863	-0.755279	0.592432	6.29e-29	5.75e-27	1901.47	1856.29	1929.43	3205.84	3221.1	3171.7	TNFRSF19	1	NO
ENSG00000187210	-0.754236	0.59286	9.71e-27	7.67e-25	1868.45	1887.62	1801.16	3201.24	3086.92	3085.77	GCNT1	1	NO
ENSG00000108963	-0.752615	0.593527	5.15e-10	7.68e-09	302.02	301.13	361.094	535.38	536.698	551.309	DPH1	1	NO
ENSG00000055163	-0.749683	0.594734	1.5e-15	4.47e-14	540.918	579.018	572.36	983.37	912.931	948.608	CYFIP2	1	NO
ENSG00000012817	-0.748659	0.595157	7.87e-15	2.13e-13	1129.42	1152.98	1003.52	1890.39	1725.23	1908.38	KDM5D	1	NO
ENSG00000248008	-0.74803	0.595416	1.14e-09	1.6e-08	253.464	239.489	279.174	438.791	418.842	438.592	NRAV	1	NO
ENSG00000275160	-0.747171	0.595771	0.0121367	0.0371894	30.1049	37.3886	57.1282	68.0724	68.9005	71.4246	AL354718.1	1	NO
ENSG00000004660	-0.746608	0.596003	1.45e-13	3.41e-12	994.434	966.04	1165.2	1712.85	1733.39	1796.78	CAMKK1	1	NO
ENSG00000255121	-0.746381	0.596097	0.0115566	0.0356702	37.8739	28.2941	38.8041	49.6745	59.8346	66.9606	AP003392.4	1	NO
ENSG00000235109	-0.74638	0.596098	6e-09	7.61e-08	214.619	242.521	255.46	388.197	409.776	396.183	ZSCAN31	1	NO
ENSG00000184986	-0.746263	0.596146	0.00252565	0.00968489	53.412	55.5776	86.2313	115.907	103.351	107.137	TMEM121	1	NO
ENSG00000109339	-0.745533	0.596448	2.1e-05	0.000138781	183.543	211.195	137.97	305.406	302.799	285.698	MAPK10	1	NO
ENSG00000059377	-0.743583	0.597254	3.66e-10	5.58e-09	612.781	540.619	697.396	1076.28	1032.6	987.668	TBXAS1	1	NO
ENSG00000168014	-0.743582	0.597255	1.03e-15	3.18e-14	754.565	757.877	769.614	1335.69	1181.28	1304.61	C2CD3	1	NO
ENSG00000233818	-0.743124	0.597444	0.00231825	0.00897869	43.7007	52.5461	44.1935	81.8709	76.1531	77.0046	AP000695.2	1	NO
ENSG00000196975	-0.743001	0.597495	1.1e-19	5.07e-18	6744.47	6957.31	7479.49	11450	11401.2	12599.7	ANXA4	1	NO
ENSG00000173933	-0.74173	0.598022	2.16e-09	2.93e-08	314.645	319.319	362.172	524.341	534.885	607.109	RBM4	1	NO
ENSG00000179300	-0.740384	0.59858	0.00359154	0.0131224	55.3542	60.6301	92.6987	103.948	111.51	132.805	RTL3	1	NO
ENSG00000165716	-0.739565	0.59892	0.00491644	0.0171902	37.8739	64.6721	49.583	83.7107	85.219	84.8167	FAM69B	1	NO
ENSG00000210112	-0.739455	0.598966	0.000684319	0.00312943	77.6901	85.8927	65.7514	124.186	147.773	110.485	MT-TM	1	NO
ENSG00000132376	-0.738515	0.599356	3.51e-09	4.6e-08	272.887	287.993	329.835	479.267	484.116	522.292	INPP5K	1	NO
ENSG00000107249	-0.737618	0.599729	1.42e-13	3.36e-12	1728.61	1773.43	1496.11	2849.84	2594.65	2892.7	GLIS3	1	NO
ENSG00000275832	-0.737581	0.599744	2.57e-13	5.85e-12	638.03	672.995	749.135	1147.11	1099.69	1187.43	ARHGAP23	1	NO
ENSG00000244045	-0.737445	0.599801	4.62e-05	0.000284029	239.868	232.416	363.249	469.148	452.386	469.84	TMEM199	1	NO
ENSG00000110583	-0.734761	0.600917	7.95e-10	1.14e-08	665.222	630.553	817.042	1152.63	1204.85	1156.19	NAA40	1	NO
ENSG00000172671	-0.73455	0.601005	7.3e-05	0.000428645	137.9	107.113	113.179	226.295	181.317	188.606	ZFAND4	1	NO
ENSG00000228782	-0.734506	0.601024	0.00647598	0.0217565	49.5275	36.3781	58.2061	82.7908	68.9005	88.1647	MRPL45P2	1	NO
ENSG00000197417	-0.734308	0.601106	0.000658636	0.00303414	62.1521	77.8087	87.3092	118.667	118.763	140.617	SHPK	1	NO
ENSG00000196196	-0.733329	0.601514	0.0144317	0.0429672	32.0472	33.3466	56.0504	70.8321	64.3675	65.8446	HRCT1	1	NO
ENSG00000182636	-0.732389	0.601906	6.77e-05	0.000400395	409.815	484.031	692.006	861.944	819.553	951.956	NDN	1	NO
ENSG00000182628	-0.732058	0.602044	5.49e-11	9.31e-10	2313.22	2375.69	2957.73	4354.79	4198.39	4144.86	SKA2	1	NO
ENSG00000087842	-0.731977	0.602078	2.45e-09	3.29e-08	293.28	316.287	349.237	536.3	496.809	559.121	PIR	1	NO
ENSG00000137460	-0.730091	0.602866	3.8e-11	6.55e-10	340.865	351.655	361.094	602.533	543.951	601.529	FHDC1	1	NO
ENSG00000175984	-0.729295	0.603198	0.00360963	0.0131771	50.4986	65.6826	51.7388	102.109	75.2465	101.557	DENND2C	1	NO
ENSG00000174332	-0.729109	0.603276	5.57e-10	8.24e-09	311.732	312.245	367.561	543.659	549.39	549.077	GLIS1	1	NO
ENSG00000163435	-0.728785	0.603412	2.89e-17	1.03e-15	2063.64	2077.59	2327.17	3416.5	3714.28	3586.85	ELF3	1	NO
ENSG00000167779	-0.727543	0.603932	1.19e-08	1.44e-07	618.608	726.551	852.612	1210.58	1207.57	1218.68	IGFBP6	1	NO
ENSG00000167889	-0.725967	0.604592	0.000243902	0.00125876	83.5169	73.7667	82.9976	134.305	118.763	145.081	MGAT5B	1	NO
ENSG00000173894	-0.725929	0.604608	5.05e-07	4.71e-06	303.963	295.067	370.795	551.018	470.518	582.557	CBX2	1	NO
ENSG00000184557	-0.725684	0.60471	0.00265883	0.0101297	448.66	426.432	455.948	568.497	1088.81	542.381	SOCS3	1	NO
ENSG00000170456	-0.724291	0.605294	5.09e-14	1.27e-12	568.109	611.354	645.657	974.171	1019.91	1020.03	DENND5B	1	NO
ENSG00000172915	-0.724011	0.605412	0.000110738	0.000617314	483.621	454.726	282.408	655.887	677.219	685.23	NBEA	1	NO
ENSG00000178700	-0.723013	0.605831	3.53e-09	4.62e-08	247.637	252.626	283.485	415.794	434.254	443.056	DHFR2	1	NO
ENSG00000153933	-0.722375	0.606099	1.53e-06	1.3e-05	226.272	231.405	199.41	413.954	330.903	339.267	DGKE	1	NO
ENSG00000167842	-0.720933	0.606705	1.5e-09	2.08e-08	409.815	455.737	513.076	769.954	785.103	714.246	MIS12	1	NO
ENSG00000183688	-0.720683	0.60681	1.43e-07	1.46e-06	1333.36	1355.08	1860.44	2515.92	2470.44	2507.67	RFLNB	1	NO
ENSG00000133466	-0.717042	0.608343	6.66e-15	1.83e-13	719.605	742.719	760.991	1209.66	1154.08	1292.34	C1QTNF6	1	NO
ENSG00000091986	-0.716192	0.608702	7.49e-05	0.00043874	2320.99	2405	3884.72	4697.92	4783.14	4662.69	CCDC80	1	NO
ENSG00000089127	-0.715433	0.609022	0.000134307	0.000735763	85.4591	91.9557	85.1534	157.302	134.175	139.501	OAS1	1	NO
ENSG00000187720	-0.715063	0.609179	8.23e-06	6e-05	135.958	157.638	140.126	248.372	212.141	252.218	THSD4	1	NO
ENSG00000166025	-0.71492	0.609239	1.22e-11	2.26e-10	1176.03	1221.7	1019.69	1943.74	1729.76	1938.51	AMOTL1	1	NO
ENSG00000184924	-0.71356	0.609814	2.45e-06	2e-05	169.947	213.216	225.279	340.362	341.783	313.599	PTRHD1	1	NO
ENSG00000267745	-0.713078	0.610017	0.00113333	0.00485934	67.9789	60.6301	56.0504	103.028	93.3782	107.137	AC060766.7	1	NO
ENSG00000167912	-0.711262	0.610786	0.000162308	0.00087145	100.997	90.9452	102.4	183.979	147.773	149.545	AC090152.1	1	NO
ENSG00000141499	-0.709522	0.611523	2.67e-05	0.000172892	385.537	402.18	588.529	715.68	738.867	794.599	WRAP53	1	NO
ENSG00000253305	-0.709327	0.611606	0.0135091	0.0406279	32.0472	40.4201	32.3367	61.6331	50.7688	59.1485	PCDHGB6	1	NO
ENSG00000265806	-0.708945	0.611767	0.00379546	0.0137574	70.8922	73.7667	46.3493	109.468	93.3782	110.485	MIR4292	1	NO
ENSG00000167258	-0.708744	0.611853	2.77e-18	1.09e-16	3156.16	3076.98	2812.22	5123.83	4741.44	4920.49	CDK12	1	NO
ENSG00000109794	-0.708676	0.611881	4.03e-08	4.48e-07	681.731	729.583	589.607	1186.67	953.727	1131.63	FAM149A	1	NO
ENSG00000170004	-0.707076	0.61256	3.82e-27	3.12e-25	5240.2	5359.7	5188.97	8601.96	8302.5	8873.39	CHD3	1	NO
ENSG00000187764	-0.707021	0.612584	6.5e-16	2.04e-14	869.158	894.295	942.077	1524.27	1400.67	1490.99	SEMA4D	1	NO
ENSG00000165879	-0.706758	0.612695	0.00134105	0.00560632	57.2965	57.5986	73.2966	98.429	103.351	104.905	FRAT1	1	NO
ENSG00000110172	-0.70646	0.612822	9.13e-06	6.6e-05	774.959	711.394	1096.22	1411.12	1441.47	1359.3	CHORDC1	1	NO
ENSG00000215067	-0.705588	0.613192	0.000667714	0.00306843	69.9211	93.9767	85.1534	131.545	123.296	151.777	ALOX12-AS1	1	NO
ENSG00000109536	-0.704941	0.613468	0.000172569	0.000921274	236.955	229.384	367.561	455.349	441.507	460.912	FRG1	1	NO
ENSG00000108590	-0.703822	0.613944	0.00238204	0.00920045	122.362	118.229	209.111	246.532	262.003	222.086	MED31	1	NO
ENSG00000260290	-0.703372	0.614135	0.00292754	0.0109861	45.6429	53.5566	49.583	80.951	79.7795	81.4687	AC092115.1	1	NO
ENSG00000125731	-0.702789	0.614383	2.73e-08	3.14e-07	224.33	245.552	259.772	383.597	389.832	414.039	SH2D3A	1	NO
ENSG00000135469	-0.701955	0.614738	0.000551327	0.00258992	105.853	134.397	142.282	191.339	179.504	252.218	COQ10A	1	NO
ENSG00000080298	-0.701917	0.614755	3.91e-06	3.06e-05	166.063	170.775	140.126	249.292	273.789	253.334	RFX3	1	NO
ENSG00000256092	-0.70178	0.614813	0.00149888	0.00616253	58.2676	56.5881	60.3619	93.8295	102.444	88.1647	AC137767.1	1	NO
ENSG00000106258	-0.700578	0.615326	7.42e-05	0.000435445	133.044	114.187	99.166	181.22	186.756	196.418	CYP3A5	1	NO
ENSG00000067646	-0.700206	0.615484	3.66e-12	7.19e-11	409.815	408.243	406.365	689.003	659.994	639.473	ZFY	1	NO
ENSG00000196730	-0.698688	0.616132	4.57e-09	5.91e-08	5254.77	5312.21	4060.42	7951.59	7499.27	8293.07	DAPK1	1	NO
ENSG00000160401	-0.698018	0.616418	0.000917301	0.00403694	85.4591	68.7142	87.3092	118.667	123.296	150.661	CFAP157	1	NO
ENSG00000229821	-0.698003	0.616425	0.00310616	0.0115869	65.0655	51.5356	66.8293	85.5505	98.8178	113.833	AC103925.1	1	NO
ENSG00000230453	-0.695903	0.617323	0.00470037	0.0165477	57.2965	75.7877	106.711	126.026	129.642	131.689	ANKRD18B	1	NO
ENSG00000139625	-0.694114	0.618089	1.94e-07	1.92e-06	313.674	300.119	287.797	458.109	448.76	554.657	MAP3K12	1	NO
ENSG00000180539	-0.694053	0.618115	0.00620969	0.0209954	42.7296	53.5566	40.9599	74.5117	69.807	78.1207	C9orf139	1	NO
ENSG00000167193	-0.693893	0.618184	5.48e-13	1.19e-11	2441.41	2490.89	2943.72	4293.16	4278.17	4166.06	CRK	1	NO
ENSG00000106868	-0.693478	0.618361	3.21e-12	6.33e-11	468.083	519.398	521.699	819.629	792.355	828.079	SUSD1	1	NO
ENSG00000140443	-0.693212	0.618475	1.04e-09	1.47e-08	1902.44	1968.46	1523.06	2891.24	2827.64	3005.41	IGF1R	1	NO
ENSG00000167880	-0.692763	0.618668	2.11e-10	3.3e-09	572.965	568.913	665.059	910.698	992.71	1016.68	EVPL	1	NO
ENSG00000078401	-0.692327	0.618855	9.57e-13	2.05e-11	674.933	694.215	602.541	1061.56	1085.18	1040.12	EDN1	1	NO
ENSG00000178802	-0.691305	0.619293	2.94e-08	3.35e-07	349.606	321.34	408.521	571.256	596.533	573.629	MPI	1	NO
ENSG00000005882	-0.690837	0.619494	6.36e-08	6.87e-07	320.472	354.686	370.795	535.38	525.819	628.313	PDK2	1	NO
ENSG00000278053	-0.689182	0.620206	5.17e-18	1.98e-16	1480	1465.23	1615.76	2456.13	2491.3	2403.88	DDX52	1	NO
ENSG00000267002	-0.688262	0.620601	3.03e-05	0.000194082	214.619	213.216	157.372	293.447	309.145	342.615	AC060780.1	1	NO
ENSG00000119922	-0.688065	0.620686	3.27e-09	4.3e-08	389.422	365.802	403.131	652.207	649.115	562.469	IFIT2	1	NO
ENSG00000164604	-0.6874	0.620972	0.00213953	0.00838062	69.9211	69.7247	60.3619	106.708	123.296	91.5128	GPR85	1	NO
ENSG00000164181	-0.686773	0.621242	1.25e-08	1.52e-07	339.894	303.151	282.408	508.703	486.836	495.508	ELOVL7	1	NO
ENSG00000138311	-0.68368	0.622575	1.82e-10	2.86e-09	351.548	364.791	342.769	585.055	572.962	542.381	ZNF365	1	NO
ENSG00000117114	-0.683643	0.622591	7.81e-11	1.3e-09	2851.23	2919.34	2323.93	4415.51	4279.08	4308.91	ADGRL2	1	NO
ENSG00000166900	-0.682238	0.623198	1.47e-15	4.38e-14	789.526	825.58	851.534	1338.45	1275.56	1343.68	STX3	1	NO
ENSG00000143036	-0.681683	0.623438	1.1e-07	1.14e-06	351.548	284.962	354.626	507.783	532.165	550.193	SLC44A3	1	NO
ENSG00000101049	-0.681135	0.623674	2.03e-13	4.68e-12	733.201	694.215	667.215	1099.28	1087	1175.16	SGK2	1	NO
ENSG00000116675	-0.68006	0.624139	2.55e-07	2.49e-06	291.338	295.067	240.37	447.99	459.639	417.388	DNAJC6	1	NO
ENSG00000108406	-0.679755	0.624271	1.75e-21	9.21e-20	1568.37	1548.09	1495.04	2435.89	2464.1	2488.7	DHX40	1	NO
ENSG00000129422	-0.679624	0.624328	5.3e-10	7.88e-09	1156.61	1141.87	928.064	1668.69	1744.27	1757.71	MTUS1	1	NO
ENSG00000108511	-0.679166	0.624526	3.99e-06	3.11e-05	504.986	504.241	687.695	872.983	855.816	987.668	HOXB6	1	NO
ENSG00000152076	-0.678338	0.624885	9.52e-08	9.97e-07	225.301	226.353	240.37	355.08	358.101	395.067	CCDC74B	1	NO
ENSG00000180573	-0.677723	0.625151	0.00477676	0.0167608	58.2676	66.6932	79.764	103.948	130.548	91.5128	HIST1H2AC	1	NO
ENSG00000146648	-0.677521	0.625239	4.22e-06	3.27e-05	11649.6	11729.9	7993.64	17345.6	15659.4	17175.4	EGFR	1	NO
ENSG00000116991	-0.677307	0.625331	1.4e-12	2.93e-11	1487.77	1411.67	1296.7	2267.55	2081.52	2364.82	SIPA1L2	1	NO
ENSG00000108559	-0.675793	0.625988	3.09e-09	4.08e-08	1180.89	1170.16	1476.71	2108.4	1971.82	2032.25	NUP88	1	NO
ENSG00000174197	-0.675432	0.626145	3.08e-08	3.49e-07	914.801	931.683	721.109	1416.64	1289.16	1397.24	MGA	1	NO
ENSG00000148225	-0.674427	0.626581	4.11e-05	0.000255218	231.128	234.437	169.229	337.602	312.772	364.935	WDR31	1	NO
ENSG00000147862	-0.671164	0.628	2.11e-11	3.76e-10	690.471	613.375	613.32	1006.37	1068.86	977.624	NFIB	1	NO
ENSG00000141232	-0.669978	0.628516	6.29e-07	5.77e-06	497.217	541.629	579.906	832.507	989.991	749.958	TOB1	1	NO
ENSG00000256806	-0.669796	0.628596	0.0136357	0.040958	40.7873	35.3676	39.882	68.0724	56.2083	60.2645	C17orf100	1	NO
ENSG00000150627	-0.668866	0.629001	0.00271825	0.0103129	63.1232	72.7562	56.0504	110.388	92.4717	102.673	WDR17	1	NO
ENSG00000186638	-0.668825	0.629019	6.69e-06	4.97e-05	403.018	385.001	293.186	576.776	527.632	617.153	KIF24	1	NO
ENSG00000135315	-0.668752	0.629051	1.93e-08	2.28e-07	269.973	297.088	284.563	439.711	477.77	435.244	CEP162	1	NO
ENSG00000113161	-0.668312	0.629242	1.63e-15	4.84e-14	2838.6	2633.37	3071.99	4494.62	4581.88	4499.75	HMGCR	1	NO
ENSG00000117009	-0.668062	0.629352	0.000839822	0.00374135	327.27	327.403	192.943	456.269	417.029	475.42	KMO	1	NO
ENSG00000204272	-0.667755	0.629485	1.58e-07	1.59e-06	442.834	436.537	554.036	726.719	746.119	803.527	NBDY	1	NO
ENSG00000111875	-0.66717	0.629741	1.6e-10	2.55e-09	637.059	627.522	738.356	1102.96	1051.64	1023.38	ASF1A	1	NO
ENSG00000162545	-0.667086	0.629777	4.54e-17	1.61e-15	1903.41	1816.88	1858.28	2987.83	2781.4	3091.35	CAMK2N1	1	NO
ENSG00000005100	-0.665374	0.630525	3.44e-13	7.71e-12	1007.06	992.313	1144.72	1676.05	1644.55	1663.97	DHX33	1	NO
ENSG00000114853	-0.66491	0.630728	1.33e-06	1.14e-05	336.981	299.109	274.862	508.703	428.815	508.9	ZBTB47	1	NO
ENSG00000023839	-0.664093	0.631085	0.0128785	0.0389604	105.853	75.7877	84.0755	118.667	191.289	110.485	ABCC2	1	NO
ENSG00000174282	-0.664034	0.631111	4.22e-12	8.22e-11	2044.22	2039.19	1717.08	3099.13	2985.38	3109.2	ZBTB4	1	NO
ENSG00000234684	-0.663565	0.631316	0.000696765	0.0031786	92.257	85.8927	87.3092	159.142	137.801	122.761	SDCBP2-AS1	1	NO
ENSG00000103227	-0.661734	0.632118	0.000211165	0.00110328	159.265	173.806	139.048	215.256	240.245	293.51	LMF1	1	NO
ENSG00000167191	-0.660718	0.632563	1.45e-10	2.33e-09	727.374	694.215	672.604	1132.39	1003.59	1177.39	GPRC5B	1	NO
ENSG00000245532	-0.660584	0.632622	1.61e-09	2.22e-08	7179.54	6073.12	6522.32	9156.66	10919.8	11184.6	NEAT1	1	NO
ENSG00000181027	-0.659013	0.633311	0.00130158	0.00546295	279.684	260.71	445.169	579.535	480.49	494.392	FKRP	1	NO
ENSG00000177370	-0.658062	0.633729	0.000351346	0.00173639	464.199	458.768	740.511	913.458	841.311	868.255	TIMM22	1	NO
ENSG00000213199	-0.65744	0.634002	0.00153477	0.00629017	110.708	87.9137	119.646	155.463	147.773	199.766	ASIC3	1	NO
ENSG00000108599	-0.656621	0.634362	4.77e-09	6.14e-08	619.579	495.146	552.958	873.902	877.574	878.299	AKAP10	1	NO
ENSG00000213949	-0.656219	0.634539	7.43e-05	0.000435821	172.861	213.216	157.372	276.889	313.678	265.61	ITGA1	1	NO
ENSG00000178921	-0.656087	0.634597	2.18e-12	4.45e-11	1843.2	1978.56	2162.25	3256.44	2960	3211.88	PFAS	1	NO
ENSG00000164323	-0.655993	0.634639	9.41e-14	2.28e-12	839.053	878.126	840.755	1350.41	1407.02	1271.13	CFAP97	1	NO
ENSG00000182010	-0.655274	0.634955	2.72e-08	3.13e-07	788.555	678.047	629.489	1159.99	1121.45	1020.03	RTKN2	1	NO
ENSG00000175662	-0.65513	0.635018	5.74e-11	9.71e-10	763.305	832.654	693.084	1184.83	1203.94	1217.57	TOM1L2	1	NO
ENSG00000265763	-0.654598	0.635252	0.00102316	0.00444447	98.0838	73.7667	91.6208	134.305	130.548	150.661	ZNF488	1	NO
ENSG00000176809	-0.653865	0.635575	9.21e-10	1.31e-08	571.994	564.871	508.765	855.505	810.487	926.288	LRRC37A3	1	NO
ENSG00000182870	-0.653582	0.6357	1.27e-05	8.81e-05	305.905	327.403	433.312	544.579	560.269	571.397	GALNT9	1	NO
ENSG00000165246	-0.652345	0.636245	4.11e-06	3.19e-05	477.794	430.474	340.614	682.564	628.263	653.982	NLGN4Y	1	NO
ENSG00000173083	-0.652143	0.636334	9.04e-05	0.000517559	142.756	130.355	171.385	230.894	217.58	249.986	HPSE	1	NO
ENSG00000131067	-0.65212	0.636345	5.4e-10	8.02e-09	537.033	582.049	613.32	913.458	849.47	959.768	GGT7	1	NO
ENSG00000167721	-0.651527	0.636606	3.63e-09	4.74e-08	1885.93	1862.36	2327.17	3307.95	3201.15	3031.08	TSR1	1	NO
ENSG00000152582	-0.651193	0.636754	0.000376696	0.00185139	108.766	85.8927	95.9323	155.463	150.493	150.661	SPEF2	1	NO
ENSG00000198088	-0.650883	0.636891	0.00369117	0.0134378	102.939	69.7247	112.101	165.582	147.773	132.805	NUP62CL	1	NO
ENSG00000150347	-0.650375	0.637115	7.5e-11	1.25e-09	1116.8	1049.91	916.208	1620.86	1595.59	1624.91	ARID5B	1	NO
ENSG00000133030	-0.648796	0.637812	6.38e-22	3.47e-20	4932.35	5236.42	5019.74	8118.09	7685.12	8010.72	MPRIP	1	NO
ENSG00000187607	-0.648463	0.63796	9.92e-06	7.1e-05	197.139	174.817	228.513	306.326	318.211	315.831	ZNF286A	1	NO
ENSG00000109111	-0.648114	0.638114	3.26e-15	9.35e-14	4231.2	4326.97	4813.86	7189.92	6735.02	7028.63	SUPT6H	1	NO
ENSG00000164120	-0.647668	0.638311	0.00651418	0.0218631	83.5169	62.6511	51.7388	104.868	103.351	102.673	HPGD	1	NO
ENSG00000146576	-0.647261	0.638491	7.16e-07	6.5e-06	440.891	482.01	594.996	801.231	780.57	793.483	C7orf26	1	NO
ENSG00000203865	-0.646088	0.639011	0.0155759	0.0457532	41.7584	44.4621	35.5704	67.1525	58.0214	65.8446	ATP1A1-AS1	1	NO
ENSG00000086061	-0.646064	0.639021	0.000223482	0.00116082	5128.52	5186.91	8323.48	9959.73	9708.62	9497.24	DNAJA1	1	NO
ENSG00000180329	-0.645371	0.639328	8.3e-08	8.79e-07	695.327	716.446	897.884	1175.63	1228.42	1206.41	CCDC43	1	NO
ENSG00000134245	-0.644992	0.639496	0.00202458	0.00797656	66.0366	67.7037	62.5177	99.3489	106.07	101.557	WNT2B	1	NO
ENSG00000248121	-0.643977	0.639947	0.00390958	0.0141166	98.0838	111.155	65.7514	149.023	138.707	142.849	SMURF2P1	1	NO
ENSG00000100068	-0.6425	0.640602	0.00399369	0.0143865	59.2387	54.5671	67.9072	88.3101	97.0046	98.2088	LRP5L	1	NO
ENSG00000168778	-0.642079	0.640789	9.78e-13	2.09e-11	603.07	636.616	656.436	998.089	975.485	984.32	TCTN2	1	NO
ENSG00000188171	-0.641689	0.640962	0.00317736	0.011803	65.0655	61.6406	56.0504	94.7494	97.9112	92.6288	ZNF626	1	NO
ENSG00000181284	-0.640656	0.641421	0.000139293	0.000759461	212.677	246.563	314.744	366.119	408.87	430.78	TMEM102	1	NO
ENSG00000131370	-0.640459	0.641509	8.01e-05	0.000465327	118.477	133.386	144.437	202.377	197.636	217.622	SH3BP5	1	NO
ENSG00000091656	-0.639721	0.641837	3.04e-11	5.33e-10	2840.55	2818.29	2372.44	4224.17	4029.77	4262.04	ZFHX4	1	NO
ENSG00000078687	-0.639652	0.641868	1.98e-08	2.33e-07	331.154	361.76	356.782	507.783	568.429	559.121	TNRC6C	1	NO
ENSG00000124225	-0.639066	0.642128	8.75e-05	0.000502957	5614.08	5851.82	8835.48	10597.2	10601.6	10414.6	PMEPA1	1	NO
ENSG00000105866	-0.636978	0.643059	1e-08	1.24e-07	536.062	484.031	465.649	757.995	826.805	725.406	SP4	1	NO
ENSG00000019485	-0.635757	0.643603	1.32e-05	9.13e-05	173.832	193.006	178.93	310.005	262.003	275.654	PRDM11	1	NO
ENSG00000165029	-0.635733	0.643614	7e-06	5.18e-05	8948.93	8997.51	6219.43	12757.1	12212.6	12579.7	ABCA1	1	NO
ENSG00000083750	-0.635415	0.643756	6.62e-05	0.000393299	169.947	160.67	135.814	257.571	243.871	223.202	RRAGB	1	NO
ENSG00000134569	-0.634842	0.644011	7.51e-13	1.62e-11	657.453	705.331	665.059	1071.68	1028.07	1049.05	LRP4	1	NO
ENSG00000198920	-0.63472	0.644066	8.9e-12	1.68e-10	529.264	547.692	533.556	845.386	850.377	803.527	KIAA0753	1	NO
ENSG00000166260	-0.634591	0.644124	1.42e-12	2.94e-11	1704.33	1708.76	1953.14	2873.76	2690.74	2764.36	COX11	1	NO
ENSG00000137502	-0.634054	0.644363	0.000328891	0.00164125	121.391	128.334	108.867	197.778	162.279	197.534	RAB30	1	NO
ENSG00000122870	-0.63365	0.644544	1.86e-10	2.92e-09	8851.82	8835.83	7259.6	13160.1	12467.4	13080.7	BICC1	1	NO
ENSG00000196507	-0.633409	0.644651	3e-07	2.91e-06	312.703	339.529	393.43	537.22	537.605	545.729	TCEAL3	1	NO
ENSG00000224687	-0.631909	0.645322	0.0138208	0.0414111	54.3831	51.5356	43.1157	89.23	66.1807	75.8886	RASAL2-AS1	1	NO
ENSG00000175283	-0.630652	0.645885	9.87e-06	7.06e-05	521.495	526.472	712.486	927.256	854.003	943.028	DOLK	1	NO
ENSG00000238083	-0.629973	0.646188	0.0004627	0.00222238	93.2282	113.176	107.789	149.023	168.625	168.517	LRRC37A2	1	NO
ENSG00000125686	-0.629951	0.646198	8.15e-09	1.02e-07	2352.07	2370.64	1921.88	3634.51	3222.91	3427.26	MED1	1	NO
ENSG00000146350	-0.629946	0.6462	0.00063619	0.00294519	164.12	120.25	114.256	207.897	205.795	204.23	TBC1D32	1	NO
ENSG00000227036	-0.629327	0.646478	5.07e-15	1.42e-13	1194.49	1222.71	1307.48	1874.75	1949.16	1936.28	LINC00511	1	NO
ENSG00000279095	-0.62846	0.646867	4.18e-09	5.41e-08	430.209	422.39	476.428	716.6	658.181	678.534	AC243964.3	1	NO
ENSG00000153707	-0.628271	0.646951	0.000156621	0.000844406	2384.12	2381.75	1523.06	3405.46	3010.77	3306.74	PTPRD	1	NO
ENSG00000214870	-0.62783	0.647149	2.01e-05	0.000133307	154.409	153.596	144.437	231.814	223.926	244.406	AC004540.1	1	NO
ENSG00000083099	-0.625844	0.64804	6.14e-08	6.64e-07	769.132	748.782	948.544	1302.57	1255.62	1245.47	LYRM2	1	NO
ENSG00000114841	-0.625483	0.648203	0.00831708	0.0269766	111.68	136.418	71.1408	167.421	158.652	167.401	DNAH1	1	NO
ENSG00000108561	-0.624411	0.648685	0.000116415	0.00064598	2281.18	2390.85	3562.43	4348.35	4153.97	4189.5	C1QBP	1	NO
ENSG00000258711	-0.623426	0.649127	0.0159663	0.0467619	56.3253	39.4096	58.2061	87.3902	72.5268	77.0046	AL358334.2	1	NO
ENSG00000174231	-0.62298	0.649328	9.48e-17	3.25e-15	10669.8	11287.3	10301.4	16807.4	15741	17134.1	PRPF8	1	NO
ENSG00000078269	-0.621782	0.649868	2.48e-19	1.1e-17	4174.87	4215.82	3941.85	6395.13	6138.49	6446.07	SYNJ2	1	NO
ENSG00000197587	-0.621532	0.64998	0.00727762	0.0240387	64.0944	69.7247	49.583	89.23	93.3782	100.441	DMBX1	1	NO
ENSG00000205476	-0.621146	0.650154	2.4e-11	4.25e-10	2194.75	2424.2	2300.22	3702.59	3224.72	3716.31	CCDC85C	1	NO
ENSG00000104267	-0.620942	0.650246	2.84e-20	1.37e-18	2771.6	2750.59	2636.52	4108.26	4190.24	4250.88	CA2	1	NO
ENSG00000144369	-0.620387	0.650496	8.41e-07	7.54e-06	229.186	240.5	225.279	336.682	366.26	366.051	FAM171B	1	NO
ENSG00000106526	-0.619553	0.650872	1.71e-10	2.71e-09	753.594	790.213	672.604	1131.47	1135.95	1139.45	ACTR3C	1	NO
ENSG00000160539	-0.618509	0.651344	0.00253937	0.00972149	95.1704	74.7772	84.0755	126.026	117.856	147.313	PLPP7	1	NO
ENSG00000237440	-0.618432	0.651378	0.00119405	0.00507336	120.42	113.176	91.6208	184.899	165.905	148.429	ZNF737	1	NO
ENSG00000173950	-0.617324	0.651879	2.01e-05	0.000133792	753.594	878.126	1122.08	1397.32	1414.27	1410.64	XXYLT1	1	NO
ENSG00000177082	-0.616066	0.652448	6.12e-05	0.000366759	187.427	176.838	224.201	273.21	308.239	320.295	WDR73	1	NO
ENSG00000128739	-0.615282	0.652802	3.45e-07	3.29e-06	474.881	527.482	607.931	783.753	825.899	855.979	SNRPN	1	NO
ENSG00000134575	-0.614948	0.652954	9.02e-05	0.000517029	432.151	461.8	641.345	771.794	763.344	814.687	ACP2	1	NO
ENSG00000105662	-0.614249	0.65327	7.19e-07	6.53e-06	364.172	367.823	348.159	559.298	490.462	605.993	CRTC1	1	NO
ENSG00000162576	-0.61405	0.65336	0.000144887	0.000787141	259.291	211.195	212.345	309.085	334.53	403.995	MXRA8	1	NO
ENSG00000249306	-0.612873	0.653893	0.000176599	0.000939822	313.674	273.846	411.755	477.427	513.127	536.801	LINC01411	1	NO
ENSG00000120696	-0.612703	0.65397	0.00489178	0.0171217	61.181	61.6406	71.1408	90.1499	101.538	104.905	KBTBD7	1	NO
ENSG00000118515	-0.612117	0.654236	0.000273705	0.00139788	322.414	318.308	473.194	550.099	557.55	593.717	SGK1	1	NO
ENSG00000167840	-0.611421	0.654552	0.00123142	0.00520467	129.16	130.355	178.93	251.132	203.075	214.274	ZNF232	1	NO
ENSG00000162631	-0.611413	0.654555	1.77e-07	1.76e-06	480.708	485.041	590.684	818.709	782.383	774.511	NTNG1	1	NO
ENSG00000204991	-0.609577	0.655389	2.27e-05	0.00014894	205.879	197.048	225.279	333.923	284.668	340.383	SPIRE2	1	NO
ENSG00000122420	-0.608333	0.655954	0.00292904	0.0109893	147.611	161.68	98.0881	208.817	217.58	195.302	PTGFR	1	NO
ENSG00000158352	-0.607921	0.656142	0.000214538	0.00111952	470.025	544.661	346.003	722.119	659.994	693.042	SHROOM4	1	NO
ENSG00000064393	-0.607573	0.6563	1.31e-08	1.59e-07	16143	15783	12912.1	23800.5	21534.1	22987.6	HIPK2	1	NO
ENSG00000154957	-0.605478	0.657253	0.000328168	0.00163813	123.333	162.691	141.204	213.416	204.888	232.13	ZNF18	1	NO
ENSG00000138593	-0.603867	0.657988	3.74e-06	2.94e-05	1890.78	1926.02	1395.87	2683.34	2613.68	2627.09	SECISBP2L	1	NO
ENSG00000102984	-0.603711	0.658059	0.00992707	0.031327	48.5563	57.5986	54.9725	78.1913	79.7795	87.0487	ZNF821	1	NO
ENSG00000163807	-0.602417	0.65865	2.42e-12	4.89e-11	902.177	994.334	918.363	1412.96	1460.51	1399.48	KIAA1143	1	NO
ENSG00000076258	-0.602299	0.658704	0.00146312	0.00603603	88.3725	81.8507	80.8419	130.625	121.482	129.457	FMO4	1	NO
ENSG00000157657	-0.60112	0.659242	4.56e-11	7.78e-10	1717.92	1531.92	1562.94	2485.56	2271	2546.73	ZNF618	1	NO
ENSG00000181004	-0.60096	0.659315	0.00140406	0.00583081	100.997	124.292	140.126	202.377	166.812	184.142	BBS12	1	NO
ENSG00000136883	-0.600899	0.659343	2.26e-05	0.000148535	1292.57	1134.79	977.647	1509.55	1676.28	1982.03	KIF12	1	NO
ENSG00000115525	-0.600792	0.659392	1.62e-09	2.23e-08	481.679	463.821	460.26	746.037	692.631	693.042	ST3GAL5	1	NO
ENSG00000165410	-0.600338	0.6596	1.17e-08	1.43e-07	982.78	997.366	1196.46	1646.62	1601.94	1564.65	CFL2	1	NO
ENSG00000100557	-0.600252	0.659639	2.39e-10	3.72e-09	636.088	641.669	583.139	950.254	907.491	965.348	CCDC198	1	NO
ENSG00000163251	-0.600049	0.659732	4.62e-08	5.08e-07	1164.38	1254.03	987.349	1655.82	1754.24	1754.37	FZD5	1	NO
ENSG00000105996	-0.598822	0.660293	1.73e-05	0.00011653	443.805	363.781	493.674	708.321	617.384	643.937	HOXA2	1	NO
ENSG00000112902	-0.597743	0.660787	9.47e-05	0.000539103	6198.7	6321.7	4188.69	8958.88	8024.18	8305.34	SEMA5A	1	NO
ENSG00000165801	-0.597611	0.660847	5.96e-10	8.77e-09	1731.52	1861.35	2087.88	2942.75	2743.33	2908.32	ARHGEF40	1	NO
ENSG00000141252	-0.596148	0.661518	1.79e-05	0.000120207	1082.81	1046.88	1472.4	1837.03	1766.03	1840.3	VPS53	1	NO
ENSG00000163762	-0.596102	0.661539	2.93e-19	1.29e-17	2650.2	2623.26	2744.31	3996.03	4105.92	4016.52	TM4SF18	1	NO
ENSG00000140474	-0.595871	0.661645	1.97e-06	1.64e-05	406.902	343.571	429.001	620.011	557.55	604.877	ULK3	1	NO
ENSG00000157578	-0.594857	0.66211	0.0045668	0.0161211	77.6901	83.8717	65.7514	113.147	125.109	104.905	LCA5L	1	NO
ENSG00000121067	-0.594449	0.662297	1.75e-07	1.75e-06	1286.74	1285.36	1621.15	2055.05	2160.39	2113.72	SPOP	1	NO
ENSG00000168806	-0.59292	0.663	7.75e-07	7e-06	425.353	417.337	518.466	675.205	679.032	697.506	LCMT2	1	NO
ENSG00000182552	-0.592695	0.663103	0.00104322	0.00451885	187.427	184.922	278.096	329.323	326.371	323.643	RWDD4	1	NO
ENSG00000188266	-0.592513	0.663187	0.000906431	0.00399804	95.1704	105.092	114.256	169.261	152.306	151.777	HYKK	1	NO
ENSG00000060656	-0.591742	0.663541	0.00273956	0.0103751	111.68	121.26	94.8544	177.54	179.504	136.153	PTPRU	1	NO
ENSG00000108523	-0.591607	0.663603	5.4e-07	5.02e-06	1423.67	1412.68	1817.32	2391.73	2256.49	2362.59	RNF167	1	NO
ENSG00000176024	-0.591006	0.66388	0.0119749	0.0367561	60.2098	57.5986	84.0755	103.028	92.4717	108.253	ZNF613	1	NO
ENSG00000276256	-0.589979	0.664353	1.88e-08	2.23e-07	567.138	502.22	506.609	773.634	765.158	835.891	AC011043.1	1	NO
ENSG00000124160	-0.589079	0.664767	1.46e-05	0.000100276	1370.26	1340.94	1856.13	2366.9	2209.35	2292.28	NCOA5	1	NO
ENSG00000006695	-0.588479	0.665044	1.15e-07	1.19e-06	425.353	434.516	503.375	674.285	672.686	701.97	COX10	1	NO
ENSG00000160325	-0.587745	0.665382	4.69e-08	5.16e-07	337.952	335.487	352.47	518.822	498.622	524.524	CACFD1	1	NO
ENSG00000075292	-0.586234	0.66608	4.45e-19	1.89e-17	2552.12	2521.2	2478.07	3736.62	3847.55	3753.14	ZNF638	1	NO
ENSG00000210127	-0.585796	0.666282	0.0142212	0.042445	49.5275	49.5146	56.0504	78.1913	82.4992	71.4246	MT-TA	1	NO
ENSG00000185621	-0.584975	0.666661	5.98e-05	0.000359063	578.791	564.871	408.521	792.951	787.822	748.842	LMLN	1	NO
ENSG00000101846	-0.584844	0.666721	2.07e-05	0.000137096	189.37	222.311	214.5	308.166	300.986	330.339	STS	1	NO
ENSG00000210117	-0.584795	0.666744	0.00974809	0.0308717	70.8922	64.6721	68.985	100.269	119.669	85.9327	MT-TW	1	NO
ENSG00000167380	-0.583623	0.667286	3.48e-05	0.000220551	205.879	194.016	238.214	301.726	322.744	331.455	ZNF226	1	NO
ENSG00000103599	-0.583313	0.667429	0.0148751	0.0440698	84.488	84.8822	60.3619	133.385	117.856	92.6288	IQCH	1	NO
ENSG00000108557	-0.582735	0.667697	2.09e-16	6.9e-15	2157.84	2262.51	2217.22	3242.64	3273.68	3426.15	RAI1	1	NO
ENSG00000186594	-0.582723	0.667702	2.96e-06	2.38e-05	340.865	323.361	399.898	516.062	520.38	556.889	MIR22HG	1	NO
ENSG00000245849	-0.582713	0.667707	0.011363	0.0351494	85.4591	73.7667	59.284	98.429	104.257	126.109	RAD51-AS1	1	NO
ENSG00000141279	-0.581974	0.668049	9.98e-23	5.82e-21	4721.62	4797.86	4765.36	7181.64	7088.59	7112.33	NPEPPS	1	NO
ENSG00000146674	-0.581673	0.668188	3.85e-06	3.02e-05	64220.6	66904.3	49105.5	92147	84015	93570.7	IGFBP3	1	NO
ENSG00000227543	-0.58143	0.668301	0.0110946	0.0344139	99.0549	60.6301	81.9197	127.866	118.763	114.949	SPAG5-AS1	1	NO
ENSG00000073584	-0.58116	0.668426	6.89e-13	1.49e-11	2845.4	2820.31	3173.31	4507.5	4292.68	4421.63	SMARCE1	1	NO
ENSG00000105708	-0.5806	0.668686	0.00927497	0.0296343	86.4303	65.6826	97.0102	120.507	140.521	110.485	ZNF14	1	NO
ENSG00000185404	-0.58047	0.668746	8e-07	7.2e-06	437.978	431.484	519.544	689.923	659.087	727.638	SP140L	1	NO
ENSG00000140471	-0.579902	0.669009	9.77e-05	0.000553603	183.543	208.163	228.513	292.527	295.547	339.267	LINS1	1	NO
ENSG00000145147	-0.579686	0.669109	0.000448304	0.00216184	120.42	121.26	130.425	195.938	190.383	168.517	SLIT2	1	NO
ENSG00000063601	-0.579661	0.669121	9.67e-09	1.19e-07	716.691	637.627	676.916	1056.04	941.942	1039	MTMR1	1	NO
ENSG00000124459	-0.57961	0.669145	1.32e-05	9.14e-05	210.734	205.132	228.513	306.326	339.969	315.831	ZNF45	1	NO
ENSG00000214654	-0.579458	0.669215	8.85e-05	0.000508145	156.351	147.533	164.917	240.093	238.432	220.97	B3GNT10	1	NO
ENSG00000162600	-0.579169	0.669349	2.06e-06	1.7e-05	256.377	257.678	267.317	390.036	409.776	366.051	OMA1	1	NO
ENSG00000213463	-0.579034	0.669412	1.12e-07	1.17e-06	527.322	462.81	547.569	766.274	795.982	733.218	SYNJ2BP	1	NO
ENSG00000112186	-0.578693	0.66957	8.8e-11	1.45e-09	793.41	821.538	875.248	1286.94	1220.26	1209.75	CAP2	1	NO
ENSG00000141456	-0.578604	0.669611	1.48e-05	0.000101305	1280.92	1325.78	1754.81	2180.16	2059.76	2272.2	PELP1	1	NO
ENSG00000160602	-0.577605	0.670075	0.000407426	0.00198682	164.12	161.68	209.111	243.773	267.443	286.814	NEK8	1	NO
ENSG00000214941	-0.577068	0.670325	0.000550003	0.00258514	181.601	191.995	253.304	324.724	323.651	284.582	ZSWIM7	1	NO
ENSG00000124098	-0.576874	0.670415	6.27e-09	7.92e-08	564.225	608.322	540.024	887.701	838.591	828.079	FAM210B	1	NO
ENSG00000134897	-0.576224	0.670717	5.46e-10	8.1e-09	812.833	719.478	770.692	1109.4	1178.56	1146.14	BIVM	1	NO
ENSG00000279312	-0.575202	0.671192	0.00582701	0.0199006	75.7479	82.8612	86.2313	111.308	111.51	142.849	AL136164.4	1	NO
ENSG00000135482	-0.574779	0.671389	0.00375075	0.0136216	124.304	91.9557	143.36	186.739	174.064	174.097	ZC3H10	1	NO
ENSG00000115415	-0.5745	0.671519	4.64e-16	1.47e-14	22976.9	23805.4	21327.2	34067.5	33760.3	33599.7	STAT1	1	NO
ENSG00000106591	-0.573939	0.67178	0.000160581	0.000863278	1155.64	970.082	1492.88	1716.53	1804.1	1864.85	MRPL32	1	NO
ENSG00000120071	-0.573901	0.671798	7.25e-10	1.05e-08	1204.2	1228.77	1050.94	1737.69	1696.22	1754.37	KANSL1	1	NO
ENSG00000073008	-0.573763	0.671862	3.92e-14	1e-12	4190.41	4499.77	4522.83	6686.73	6224.61	6755.2	PVR	1	NO
ENSG00000236088	-0.573672	0.671904	6.25e-05	0.000373069	161.207	171.785	184.319	262.171	262.003	244.406	COX10-AS1	1	NO
ENSG00000139112	-0.572418	0.672489	1.82e-10	2.87e-09	2089.86	2147.32	2015.66	3005.3	2912.86	3383.74	GABARAPL1	1	NO
ENSG00000162572	-0.569243	0.67397	0.000333017	0.00165763	139.842	153.596	129.347	198.698	207.608	222.086	SCNN1D	1	NO
ENSG00000153823	-0.568974	0.674096	5.2e-05	0.000315912	182.572	223.321	210.189	295.287	315.492	302.439	PID1	1	NO
ENSG00000196922	-0.568358	0.674384	2.94e-08	3.35e-07	585.589	594.175	531.4	874.822	795.075	869.371	ZNF252P	1	NO
ENSG00000278535	-0.567528	0.674772	1.47e-06	1.25e-05	444.776	449.674	547.569	713.84	700.79	720.942	DHRS11	1	NO
ENSG00000071282	-0.566923	0.675055	2.16e-05	0.000142705	605.012	651.774	828.898	1055.12	988.178	1044.58	LMCD1	1	NO
ENSG00000269825	-0.566088	0.675446	2.51e-05	0.000163054	359.317	336.497	278.096	503.184	456.012	484.348	AC022150.4	1	NO
ENSG00000128928	-0.566087	0.675446	4.16e-07	3.91e-06	1306.17	1360.14	1649.17	2215.11	2032.56	2139.39	IVD	1	NO
ENSG00000185551	-0.566062	0.675458	8.02e-15	2.17e-13	2517.16	2632.36	2523.34	3865.41	3616.37	3879.25	NR2F2	1	NO
ENSG00000184988	-0.565945	0.675513	0.000188591	0.000997676	181.601	167.743	184.319	260.331	237.525	293.51	TMEM106A	1	NO
ENSG00000167202	-0.56577	0.675595	1.09e-08	1.34e-07	837.111	845.79	725.421	1208.75	1149.55	1208.64	TBC1D2B	1	NO
ENSG00000128487	-0.565562	0.675692	1.62e-13	3.79e-12	1308.11	1347	1360.3	2009.98	1906.55	2026.67	SPECC1	1	NO
ENSG00000257354	-0.564428	0.676224	0.00895772	0.0287839	89.3436	67.7037	100.244	133.385	114.23	132.805	AC048341.1	1	NO
ENSG00000182150	-0.564104	0.676375	5.39e-06	4.09e-05	758.45	674.005	577.75	1051.44	976.392	945.26	ERCC6L2	1	NO
ENSG00000164535	-0.563034	0.676877	1.88e-07	1.86e-06	490.419	464.831	538.946	775.473	705.323	725.406	DAGLB	1	NO
ENSG00000166444	-0.56275	0.67701	5.79e-08	6.27e-07	555.484	578.007	560.504	847.225	765.158	891.692	ST5	1	NO
ENSG00000182963	-0.562575	0.677093	6.69e-15	1.83e-13	3229.97	3175	3484.82	4897.53	4831.19	4875.85	GJC1	1	NO
ENSG00000114019	-0.562222	0.677258	6.11e-15	1.69e-13	5323.72	5442.57	5065.01	7724.38	7524.65	8130.13	AMOTL2	1	NO
ENSG00000176399	-0.562122	0.677305	7.11e-07	6.47e-06	338.923	332.455	329.835	527.101	474.144	476.536	DMRTA1	1	NO
ENSG00000047365	-0.56142	0.677635	0.000476096	0.0022796	198.11	216.247	156.294	292.527	268.349	282.35	ARAP2	1	NO
ENSG00000182318	-0.56099	0.677837	0.00334029	0.0123297	100.997	107.113	142.282	170.181	163.185	183.026	ZSCAN22	1	NO
ENSG00000161395	-0.560849	0.677903	4.67e-06	3.59e-05	373.884	427.442	454.87	609.892	579.308	664.026	PGAP3	1	NO
ENSG00000134138	-0.560831	0.677912	3.25e-08	3.67e-07	781.757	793.244	925.909	1201.39	1259.25	1226.49	MEIS2	1	NO
ENSG00000109103	-0.560154	0.67823	1.38e-06	1.19e-05	571.022	586.091	706.019	916.218	875.761	954.188	UNC119	1	NO
ENSG00000136444	-0.559291	0.678636	1.11e-05	7.82e-05	555.484	630.553	703.863	878.502	876.668	1030.08	RSAD1	1	NO
ENSG00000215190	-0.559239	0.67866	0.0160283	0.0469026	75.7479	95.9977	131.503	160.982	151.4	132.805	LINC00680	1	NO
ENSG00000133026	-0.558745	0.678892	9.41e-17	3.23e-15	4314.72	4393.66	4163.89	6441.12	6116.73	6404.78	MYH10	1	NO
ENSG00000139531	-0.555289	0.680521	3.46e-05	0.000219975	253.464	273.846	301.81	369.799	413.403	435.244	SUOX	1	NO
ENSG00000142871	-0.554283	0.680995	5.42e-05	0.000328574	9964.73	10150.5	14108.5	16732.9	16609.5	16910.9	CYR61	1	NO
ENSG00000011258	-0.553559	0.681337	6.86e-05	0.000404924	597.243	597.207	449.481	757.995	870.322	785.671	MBTD1	1	NO
ENSG00000065559	-0.553065	0.681571	2.79e-09	3.71e-08	958.502	928.652	1006.75	1515.99	1391.61	1335.86	MAP2K4	1	NO
ENSG00000008838	-0.552687	0.681749	4.36e-08	4.81e-07	2023.83	2236.24	2505.02	3358.55	3164.89	3398.25	MED24	1	NO
ENSG00000123643	-0.552624	0.681779	1.27e-05	8.84e-05	336.981	306.182	364.327	534.46	462.358	479.884	SLC36A1	1	NO
ENSG00000128973	-0.552115	0.682019	3.64e-07	3.46e-06	860.418	913.494	1018.61	1359.61	1261.06	1474.25	CLN6	1	NO
[truncated: 3,038 more rows]

## Sheet: Candidates (Score>1) 92 gen (2)
	This tab details the scoring of target genes without clustered FOXD1 binding domains. Genes with scores greater than 2 were analyzed for targetability.
[truncated: 662 more rows]

[truncated: 2 more sheets: Candidate Ranking (73), Final  List (28)]
